# Supplementary material for: Myeloid cell reprogramming alleviates immunosuppression and promotes clearance of metastatic lesions
Source: Front Oncol. 2022 Nov 21;12:1039993. doi: 10.3389/fonc.2022.1039993 (PMC9720131; doi:10.3389/fonc.2022.1039993)
Supplement: Supplementary Table 1 — List of genes used to assign identities to single cell clusters in . [file Table_1.xlsx]

## Sheet: TableS1
	p_val	avg_log2FC	pct.1	pct.2	p_val_adj	cluster	gene
Chil3	0	4.60641	0.985	0.165	0	Alveolar Macrophages	Chil3
Lpl	0	3.99196	0.979	0.08	0	Alveolar Macrophages	Lpl
Ear2	0	3.9535	0.982	0.064	0	Alveolar Macrophages	Ear2
Plet1	0	3.686	0.979	0.006	0	Alveolar Macrophages	Plet1
Spp1	0	3.61036	0.938	0.028	0	Alveolar Macrophages	Spp1
Abcg1	0	3.59871	0.985	0.205	0	Alveolar Macrophages	Abcg1
Mrc1	0	3.58113	0.979	0.013	0	Alveolar Macrophages	Mrc1
Ear1	0	3.19774	0.946	0.005	0	Alveolar Macrophages	Ear1
Atp6v0d2	0	3.04442	0.977	0.004	0	Alveolar Macrophages	Atp6v0d2
Fabp1	0	3.0014	0.884	0.003	0	Alveolar Macrophages	Fabp1
Mt1	0	2.80087	0.977	0.177	0	Alveolar Macrophages	Mt1
Il18	0	2.7941	0.987	0.075	0	Alveolar Macrophages	Il18
Slc7a2	0	2.75041	0.967	0.006	0	Alveolar Macrophages	Slc7a2
Axl	0	2.56235	0.979	0.026	0	Alveolar Macrophages	Axl
Nceh1	0	2.54473	0.972	0.117	0	Alveolar Macrophages	Nceh1
Ltc4s	0	2.46465	0.969	0.013	0	Alveolar Macrophages	Ltc4s
Cd164	0	2.45269	0.979	0.318	0	Alveolar Macrophages	Cd164
Tcf7l2	0	2.40389	0.956	0.104	0	Alveolar Macrophages	Tcf7l2
Gns	0	2.36814	0.969	0.22	0	Alveolar Macrophages	Gns
Abhd12	0	2.35461	0.974	0.16	0	Alveolar Macrophages	Abhd12
Pld3	0	2.34545	0.961	0.092	0	Alveolar Macrophages	Pld3
Lipa	0	2.2513	0.967	0.256	0	Alveolar Macrophages	Lipa
Fcgrt	0	2.19209	0.974	0.152	0	Alveolar Macrophages	Fcgrt
F7	0	2.16832	0.954	0.007	0	Alveolar Macrophages	F7
Dab2	0	2.16392	0.951	0.019	0	Alveolar Macrophages	Dab2
Clec4n	0	2.13101	0.972	0.106	0	Alveolar Macrophages	Clec4n
Anxa4	0	2.06918	0.969	0.125	0	Alveolar Macrophages	Anxa4
Sept9	0	2.06677	0.974	0.299	0	Alveolar Macrophages	Sept9
AU020206	0	2.0253	0.967	0.115	0	Alveolar Macrophages	AU020206
Net1	0	2.00056	0.949	0.048	0	Alveolar Macrophages	Net1
Sort1	0	1.98739	0.967	0.214	0	Alveolar Macrophages	Sort1
Lrp1	0	1.95724	0.967	0.201	0	Alveolar Macrophages	Lrp1
Ctsk	0	1.93899	0.799	0.008	0	Alveolar Macrophages	Ctsk
Dhrs3	0	1.9344	0.972	0.161	0	Alveolar Macrophages	Dhrs3
Itgax	0	1.92987	0.941	0.061	0	Alveolar Macrophages	Itgax
Acaa1b	0	1.90115	0.864	0.023	0	Alveolar Macrophages	Acaa1b
Lmna	0	1.89998	0.967	0.13	0	Alveolar Macrophages	Lmna
AI504432	0	1.8713	0.925	0.039	0	Alveolar Macrophages	AI504432
Ncoa4	0	1.84666	0.951	0.176	0	Alveolar Macrophages	Ncoa4
Colgalt1	0	1.84185	0.969	0.141	0	Alveolar Macrophages	Colgalt1
Olr1	0	1.83726	0.905	0.019	0	Alveolar Macrophages	Olr1
Pik3ap1	0	1.82874	0.967	0.228	0	Alveolar Macrophages	Pik3ap1
Shtn1	0	1.79353	0.956	0.081	0	Alveolar Macrophages	Shtn1
Ccnd2	0	1.7908	0.936	0.165	0	Alveolar Macrophages	Ccnd2
Cd302	0	1.7853	0.967	0.218	0	Alveolar Macrophages	Cd302
S100a1	0	1.78297	0.959	0.193	0	Alveolar Macrophages	S100a1
Runx1	0	1.76509	0.956	0.231	0	Alveolar Macrophages	Runx1
Rexo2	0	1.75007	0.982	0.258	0	Alveolar Macrophages	Rexo2
Hvcn1	0	1.7184	0.959	0.059	0	Alveolar Macrophages	Hvcn1
Cidec	0	1.71829	0.874	0.001	0	Alveolar Macrophages	Cidec
Bcl2a1b	0	1.69271	0.969	0.133	0	Alveolar Macrophages	Bcl2a1b
Lilra5	0	1.6368	0.946	0.042	0	Alveolar Macrophages	Lilra5
Dst	0	1.61467	0.931	0.07	0	Alveolar Macrophages	Dst
Cyb561a3	0	1.61429	0.923	0.105	0	Alveolar Macrophages	Cyb561a3
Dock10	0	1.59714	0.956	0.207	0	Alveolar Macrophages	Dock10
Pla2g15	0	1.59509	0.946	0.118	0	Alveolar Macrophages	Pla2g15
Cd2	0	1.58825	0.961	0.136	0	Alveolar Macrophages	Cd2
Bcl2a1a	0	1.58045	0.959	0.072	0	Alveolar Macrophages	Bcl2a1a
Camk1	0	1.5511	0.964	0.155	0	Alveolar Macrophages	Camk1
Mgll	0	1.54658	0.954	0.081	0	Alveolar Macrophages	Mgll
Lgmn	0	1.5417	0.941	0.176	0	Alveolar Macrophages	Lgmn
Cebpa	0	1.52417	0.905	0.113	0	Alveolar Macrophages	Cebpa
Klhdc4	0	1.51764	0.913	0.112	0	Alveolar Macrophages	Klhdc4
Sulf2	0	1.51759	0.92	0.056	0	Alveolar Macrophages	Sulf2
Sh2d1b1	0	1.49817	0.933	0.066	0	Alveolar Macrophages	Sh2d1b1
Krt19	0	1.47181	0.823	0.014	0	Alveolar Macrophages	Krt19
Myof	0	1.46954	0.928	0.111	0	Alveolar Macrophages	Myof
Lpin1	0	1.4643	0.884	0.021	0	Alveolar Macrophages	Lpin1
Rassf4	0	1.45334	0.956	0.182	0	Alveolar Macrophages	Rassf4
Prkar2b	0	1.43809	0.915	0.146	0	Alveolar Macrophages	Prkar2b
Cndp2	0	1.43763	0.956	0.18	0	Alveolar Macrophages	Cndp2
Lrp12	0	1.43502	0.895	0.024	0	Alveolar Macrophages	Lrp12
Cd274	0	1.42596	0.928	0.133	0	Alveolar Macrophages	Cd274
Ms4a8a	0	1.41796	0.859	0.067	0	Alveolar Macrophages	Ms4a8a
Ppp1r14b	0	1.41169	0.982	0.228	0	Alveolar Macrophages	Ppp1r14b
Gpnmb	0	1.40416	0.535	0.003	0	Alveolar Macrophages	Gpnmb
Vat1	0	1.3939	0.902	0.104	0	Alveolar Macrophages	Vat1
Bcl2a1d	0	1.39204	0.941	0.102	0	Alveolar Macrophages	Bcl2a1d
Tmbim1	0	1.37734	0.951	0.117	0	Alveolar Macrophages	Tmbim1
Bhlhe41	0	1.37367	0.799	0.012	0	Alveolar Macrophages	Bhlhe41
Evl	0	1.37172	0.936	0.19	0	Alveolar Macrophages	Evl
Dapk1	0	1.36404	0.9	0.03	0	Alveolar Macrophages	Dapk1
Lima1	0	1.35811	0.92	0.075	0	Alveolar Macrophages	Lima1
Ly75	0	1.34733	0.884	0.069	0	Alveolar Macrophages	Ly75
Egr2	0	1.33431	0.789	0.084	0	Alveolar Macrophages	Egr2
Tnfsf13	0	1.33309	0.9	0.136	0	Alveolar Macrophages	Tnfsf13
Tbxas1	0	1.32516	0.877	0.046	0	Alveolar Macrophages	Tbxas1
Abcd2	0	1.31831	0.902	0.187	0	Alveolar Macrophages	Abcd2
Ramp1	0	1.31507	0.925	0.101	0	Alveolar Macrophages	Ramp1
Phgdh	0	1.31121	0.874	0.044	0	Alveolar Macrophages	Phgdh
Comt	0	1.29573	0.951	0.187	0	Alveolar Macrophages	Comt
B3gnt7	0	1.28589	0.838	0.009	0	Alveolar Macrophages	B3gnt7
Npc1	0	1.25588	0.91	0.128	0	Alveolar Macrophages	Npc1
Serpinb6a	0	1.25461	0.954	0.163	0	Alveolar Macrophages	Serpinb6a
Rgs1	0	1.24564	0.668	0.076	0	Alveolar Macrophages	Rgs1
Blvra	0	1.21772	0.892	0.126	0	Alveolar Macrophages	Blvra
Atp13a3	0	1.21136	0.938	0.171	0	Alveolar Macrophages	Atp13a3
Serpine1	0	1.19842	0.653	0.016	0	Alveolar Macrophages	Serpine1
Tgfbr1	0	1.19776	0.905	0.166	0	Alveolar Macrophages	Tgfbr1
Lrrc58	0	1.18163	0.933	0.173	0	Alveolar Macrophages	Lrrc58
Klhl9	0	1.17892	0.936	0.188	0	Alveolar Macrophages	Klhl9
Acox1	0	1.17585	0.882	0.119	0	Alveolar Macrophages	Acox1
Siglecf	0	1.17432	0.817	0.053	0	Alveolar Macrophages	Siglecf
Pcyox1	0	1.17085	0.823	0.088	0	Alveolar Macrophages	Pcyox1
Kcnn3	0	1.16871	0.848	0.02	0	Alveolar Macrophages	Kcnn3
Abcc5	0	1.16751	0.871	0.112	0	Alveolar Macrophages	Abcc5
Cd200r4	0	1.16109	0.82	0.031	0	Alveolar Macrophages	Cd200r4
Hsd3b7	0	1.15307	0.843	0.083	0	Alveolar Macrophages	Hsd3b7
Tbc1d9	0	1.14957	0.853	0.053	0	Alveolar Macrophages	Tbc1d9
Kcnq1ot1	0	1.14818	0.825	0.111	0	Alveolar Macrophages	Kcnq1ot1
Ppt2	0	1.14103	0.897	0.118	0	Alveolar Macrophages	Ppt2
Adcy3	0	1.1082	0.722	0.01	0	Alveolar Macrophages	Adcy3
Frmd4a	0	1.09379	0.859	0.076	0	Alveolar Macrophages	Frmd4a
Plekhb2	0	1.09121	0.871	0.126	0	Alveolar Macrophages	Plekhb2
Mtss1	0	1.08666	0.871	0.086	0	Alveolar Macrophages	Mtss1
Zfp703	0	1.0808	0.841	0.115	0	Alveolar Macrophages	Zfp703
Gusb	0	1.07961	0.907	0.174	0	Alveolar Macrophages	Gusb
Adgre1	0	1.0793	0.851	0.112	0	Alveolar Macrophages	Adgre1
Krt79	0	1.07313	0.373	0.001	0	Alveolar Macrophages	Krt79
Amz1	0	1.07271	0.861	0.087	0	Alveolar Macrophages	Amz1
Rin2	0	1.06673	0.877	0.113	0	Alveolar Macrophages	Rin2
Perp	0	1.0604	0.81	0.003	0	Alveolar Macrophages	Perp
Slc9a4	0	1.05508	0.789	0.002	0	Alveolar Macrophages	Slc9a4
Renbp	0	1.05304	0.815	0.065	0	Alveolar Macrophages	Renbp
Mgat4b	0	1.04949	0.866	0.084	0	Alveolar Macrophages	Mgat4b
Pqlc3	0	1.04932	0.877	0.167	0	Alveolar Macrophages	Pqlc3
Itpripl2	0	1.04708	0.907	0.144	0	Alveolar Macrophages	Itpripl2
Pparg	0	1.04694	0.779	0.026	0	Alveolar Macrophages	Pparg
Gsto1	0	1.03879	0.874	0.107	0	Alveolar Macrophages	Gsto1
Sdc3	0	1.02673	0.843	0.103	0	Alveolar Macrophages	Sdc3
Cd22	0	1.01423	0.848	0.041	0	Alveolar Macrophages	Cd22
Car4	0	1.01146	0.676	0.079	0	Alveolar Macrophages	Car4
Bcar3	0	1.00629	0.807	0.031	0	Alveolar Macrophages	Bcar3
Ralgds	0	1.00328	0.797	0.037	0	Alveolar Macrophages	Ralgds
Gdf15	0	1.00327	0.329	0.003	0	Alveolar Macrophages	Gdf15
Dnase2a	0	0.999621	0.879	0.14	0	Alveolar Macrophages	Dnase2a
Tfec	0	0.99545	0.774	0.033	0	Alveolar Macrophages	Tfec
Creb5	0	0.990336	0.756	0.016	0	Alveolar Macrophages	Creb5
Cdk6	0	0.98979	0.851	0.086	0	Alveolar Macrophages	Cdk6
Ivns1abp	0	0.987066	0.895	0.157	0	Alveolar Macrophages	Ivns1abp
Card11	0	0.986819	0.797	0.04	0	Alveolar Macrophages	Card11
Samd8	0	0.98242	0.874	0.131	0	Alveolar Macrophages	Samd8
Mfsd12	0	0.965146	0.756	0.038	0	Alveolar Macrophages	Mfsd12
Spns1	0	0.944985	0.825	0.084	0	Alveolar Macrophages	Spns1
Slc16a10	0	0.93624	0.812	0.133	0	Alveolar Macrophages	Slc16a10
Flvcr2	0	0.935524	0.761	0.002	0	Alveolar Macrophages	Flvcr2
Il1a	0	0.929232	0.614	0.017	0	Alveolar Macrophages	Il1a
Slamf9	0	0.923705	0.748	0.016	0	Alveolar Macrophages	Slamf9
Atxn1	0	0.918324	0.807	0.125	0	Alveolar Macrophages	Atxn1
Nav2	0	0.913031	0.733	0.023	0	Alveolar Macrophages	Nav2
Pald1	0	0.911674	0.81	0.032	0	Alveolar Macrophages	Pald1
Kctd12b	0	0.908339	0.728	0.026	0	Alveolar Macrophages	Kctd12b
2022-09-11	0	0.907623	0.851	0.137	0	Alveolar Macrophages	2022-09-11
Pros1	0	0.90615	0.848	0.118	0	Alveolar Macrophages	Pros1
Cttnbp2nl	0	0.895264	0.784	0.064	0	Alveolar Macrophages	Cttnbp2nl
Aig1	0	0.890319	0.766	0.093	0	Alveolar Macrophages	Aig1
Pianp	0	0.888664	0.769	0.05	0	Alveolar Macrophages	Pianp
Nagk	0	0.888262	0.82	0.114	0	Alveolar Macrophages	Nagk
Trerf1	0	0.886134	0.748	0.038	0	Alveolar Macrophages	Trerf1
P2ry14	0	0.88589	0.715	0.02	0	Alveolar Macrophages	P2ry14
Afap1	0	0.880359	0.746	0.045	0	Alveolar Macrophages	Afap1
Asph	0	0.861902	0.781	0.099	0	Alveolar Macrophages	Asph
Tns1	0	0.860564	0.861	0.128	0	Alveolar Macrophages	Tns1
Slc6a4	0	0.859857	0.686	0.004	0	Alveolar Macrophages	Slc6a4
Nln	0	0.857835	0.756	0.069	0	Alveolar Macrophages	Nln
Epcam	0	0.855528	0.555	0.017	0	Alveolar Macrophages	Epcam
Xlr	0	0.847414	0.463	0.024	0	Alveolar Macrophages	Xlr
Ttyh2	0	0.846524	0.779	0.014	0	Alveolar Macrophages	Ttyh2
Tmem106a	0	0.838322	0.799	0.111	0	Alveolar Macrophages	Tmem106a
Qdpr	0	0.830531	0.81	0.069	0	Alveolar Macrophages	Qdpr
Tmcc3	0	0.830169	0.859	0.108	0	Alveolar Macrophages	Tmcc3
Sh3pxd2b	0	0.826508	0.704	0.021	0	Alveolar Macrophages	Sh3pxd2b
Cpne5	0	0.820811	0.581	0.002	0	Alveolar Macrophages	Cpne5
Lsr	0	0.820138	0.738	0.042	0	Alveolar Macrophages	Lsr
Slco2b1	0	0.817782	0.679	0.003	0	Alveolar Macrophages	Slco2b1
Ggta1	0	0.805872	0.823	0.118	0	Alveolar Macrophages	Ggta1
Man2a2	0	0.798579	0.799	0.102	0	Alveolar Macrophages	Man2a2
Sfxn3	0	0.793472	0.761	0.098	0	Alveolar Macrophages	Sfxn3
Sh3tc1	0	0.788109	0.751	0.066	0	Alveolar Macrophages	Sh3tc1
4931406C07Rik	0	0.786669	0.697	0.05	0	Alveolar Macrophages	4931406C07Rik
Mink1	0	0.777422	0.815	0.116	0	Alveolar Macrophages	Mink1
Adarb1	0	0.771575	0.715	0.016	0	Alveolar Macrophages	Adarb1
Uap1l1	0	0.771071	0.763	0.097	0	Alveolar Macrophages	Uap1l1
Nek6	0	0.769737	0.653	0.032	0	Alveolar Macrophages	Nek6
Rxra	0	0.757756	0.781	0.074	0	Alveolar Macrophages	Rxra
Slc29a1	0	0.752889	0.797	0.093	0	Alveolar Macrophages	Slc29a1
Slc39a2	0	0.745885	0.55	0.001	0	Alveolar Macrophages	Slc39a2
Slc36a4	0	0.735535	0.72	0.07	0	Alveolar Macrophages	Slc36a4
Prune2	0	0.724056	0.656	0.003	0	Alveolar Macrophages	Prune2
Pon3	0	0.718935	0.663	0.034	0	Alveolar Macrophages	Pon3
Dhrs7b	0	0.718285	0.684	0.064	0	Alveolar Macrophages	Dhrs7b
Trem2	0	0.716417	0.666	0.078	0	Alveolar Macrophages	Trem2
Kazald1	0	0.716332	0.568	0.01	0	Alveolar Macrophages	Kazald1
Mitf	0	0.712622	0.697	0.055	0	Alveolar Macrophages	Mitf
Fcor	0	0.710478	0.64	0.065	0	Alveolar Macrophages	Fcor
Nrp2	0	0.710079	0.653	0.065	0	Alveolar Macrophages	Nrp2
Cdc42bpb	0	0.704492	0.792	0.107	0	Alveolar Macrophages	Cdc42bpb
C77080	0	0.69973	0.545	0.007	0	Alveolar Macrophages	C77080
Mmp19	0	0.689633	0.55	0.057	0	Alveolar Macrophages	Mmp19
Gm10134	0	0.688303	0.653	0.008	0	Alveolar Macrophages	Gm10134
Slc12a7	0	0.688216	0.692	0.048	0	Alveolar Macrophages	Slc12a7
Luzp1	0	0.683375	0.833	0.121	0	Alveolar Macrophages	Luzp1
Ffar4	0	0.673369	0.591	0.004	0	Alveolar Macrophages	Ffar4
Havcr2	0	0.671576	0.661	0.035	0	Alveolar Macrophages	Havcr2
Acot1	0	0.671184	0.62	0.055	0	Alveolar Macrophages	Acot1
Tep1	0	0.665884	0.679	0.085	0	Alveolar Macrophages	Tep1
Igflr1	0	0.649992	0.553	0.029	0	Alveolar Macrophages	Igflr1
Plekhm2	0	0.64393	0.674	0.066	0	Alveolar Macrophages	Plekhm2
Tlr7	0	0.642998	0.699	0.09	0	Alveolar Macrophages	Tlr7
Mmd	0	0.633166	0.674	0.048	0	Alveolar Macrophages	Mmd
Man1c1	0	0.625531	0.674	0.072	0	Alveolar Macrophages	Man1c1
Atp10a	0	0.623858	0.594	0.015	0	Alveolar Macrophages	Atp10a
Kcnip4	0	0.616245	0.599	0.001	0	Alveolar Macrophages	Kcnip4
C530008M17Rik	0	0.616019	0.589	0.007	0	Alveolar Macrophages	C530008M17Rik
Tmem245	0	0.612336	0.671	0.072	0	Alveolar Macrophages	Tmem245
Lhfpl2	0	0.610847	0.566	0.007	0	Alveolar Macrophages	Lhfpl2
Dip2c	0	0.60956	0.599	0.021	0	Alveolar Macrophages	Dip2c
Cxcl14	0	0.606937	0.53	0.014	0	Alveolar Macrophages	Cxcl14
Tmem238	0	0.606783	0.653	0.053	0	Alveolar Macrophages	Tmem238
Mob3b	0	0.605731	0.668	0.072	0	Alveolar Macrophages	Mob3b
Gpr155	0	0.6039	0.55	0.024	0	Alveolar Macrophages	Gpr155
Mmp12	0	0.60377	0.198	0.002	0	Alveolar Macrophages	Mmp12
Deptor	0	0.597923	0.604	0.045	0	Alveolar Macrophages	Deptor
Dpp7	0	0.592666	0.62	0.038	0	Alveolar Macrophages	Dpp7
Bckdhb	0	0.589132	0.571	0.026	0	Alveolar Macrophages	Bckdhb
Mertk	0	0.583734	0.568	0.017	0	Alveolar Macrophages	Mertk
Ppp1r12b	0	0.582672	0.609	0.027	0	Alveolar Macrophages	Ppp1r12b
Dnmt3a	0	0.572876	0.64	0.067	0	Alveolar Macrophages	Dnmt3a
Mcoln3	0	0.571043	0.447	0.002	0	Alveolar Macrophages	Mcoln3
Rarres1	0	0.567867	0.514	0.002	0	Alveolar Macrophages	Rarres1
Fam118b	0	0.565343	0.63	0.074	0	Alveolar Macrophages	Fam118b
Tmem86a	0	0.564	0.586	0.057	0	Alveolar Macrophages	Tmem86a
Fam89a	0	0.561881	0.576	0.029	0	Alveolar Macrophages	Fam89a
Vstm2a	0	0.561758	0.519	0	0	Alveolar Macrophages	Vstm2a
Cyp4v3	0	0.55959	0.666	0.059	0	Alveolar Macrophages	Cyp4v3
Myo7a	0	0.550025	0.584	0.017	0	Alveolar Macrophages	Myo7a
Socs2	0	0.549526	0.589	0.043	0	Alveolar Macrophages	Socs2
Dock7	0	0.546606	0.581	0.041	0	Alveolar Macrophages	Dock7
Cluh	0	0.540824	0.566	0.046	0	Alveolar Macrophages	Cluh
Galnt3	0	0.540249	0.548	0.018	0	Alveolar Macrophages	Galnt3
Clec16a	0	0.539669	0.653	0.068	0	Alveolar Macrophages	Clec16a
Ahnak2	0	0.53371	0.388	0.011	0	Alveolar Macrophages	Ahnak2
Inf2	0	0.529281	0.573	0.061	0	Alveolar Macrophages	Inf2
Ppfibp1	0	0.527882	0.663	0.059	0	Alveolar Macrophages	Ppfibp1
B3glct	0	0.525492	0.542	0.026	0	Alveolar Macrophages	B3glct
Dennd4c	0	0.524904	0.596	0.056	0	Alveolar Macrophages	Dennd4c
AU022793	0	0.524725	0.486	0.001	0	Alveolar Macrophages	AU022793
Aldoc	0	0.521969	0.445	0.018	0	Alveolar Macrophages	Aldoc
Cox6b2	0	0.519271	0.463	0.035	0	Alveolar Macrophages	Cox6b2
Clmn	0	0.509578	0.509	0.02	0	Alveolar Macrophages	Clmn
Plekhg1	0	0.509281	0.571	0.028	0	Alveolar Macrophages	Plekhg1
Tmem64	0	0.500794	0.581	0.056	0	Alveolar Macrophages	Tmem64
Mavs	0	0.500453	0.56	0.032	0	Alveolar Macrophages	Mavs
Lyrm4	0	0.493356	0.509	0.024	0	Alveolar Macrophages	Lyrm4
Clec4b1	0	0.485299	0.499	0.025	0	Alveolar Macrophages	Clec4b1
Ccdc80	0	0.483968	0.411	0.013	0	Alveolar Macrophages	Ccdc80
Gmpr	0	0.483168	0.499	0.008	0	Alveolar Macrophages	Gmpr
Acss1	0	0.481481	0.537	0.031	0	Alveolar Macrophages	Acss1
Slc7a8	0	0.480888	0.535	0.028	0	Alveolar Macrophages	Slc7a8
Snx24	0	0.479443	0.527	0.043	0	Alveolar Macrophages	Snx24
Pdgfc	0	0.471632	0.476	0.001	0	Alveolar Macrophages	Pdgfc
Aco1	0	0.470376	0.55	0.055	0	Alveolar Macrophages	Aco1
Il1rl2	0	0.470149	0.504	0.007	0	Alveolar Macrophages	Il1rl2
Hs6st1	0	0.468628	0.563	0.054	0	Alveolar Macrophages	Hs6st1
Gm16096	0	0.465822	0.494	0.035	0	Alveolar Macrophages	Gm16096
Angptl4	0	0.462605	0.496	0.015	0	Alveolar Macrophages	Angptl4
Sh3bgrl2	0	0.461249	0.478	0.005	0	Alveolar Macrophages	Sh3bgrl2
Naglu	0	0.452791	0.517	0.049	0	Alveolar Macrophages	Naglu
Pde3b	0	0.450479	0.517	0.034	0	Alveolar Macrophages	Pde3b
Ocrl	0	0.449099	0.568	0.055	0	Alveolar Macrophages	Ocrl
Sema3e	0	0.444385	0.375	0.003	0	Alveolar Macrophages	Sema3e
Ptgfrn	0	0.442418	0.753	0.096	0	Alveolar Macrophages	Ptgfrn
Klrb1b	0	0.441808	0.458	0.004	0	Alveolar Macrophages	Klrb1b
Mag	0	0.43874	0.437	0.007	0	Alveolar Macrophages	Mag
Aifm2	0	0.434216	0.506	0.046	0	Alveolar Macrophages	Aifm2
2022-03-08	0	0.431248	0.55	0.051	0	Alveolar Macrophages	2022-03-08
Rnf180	0	0.429424	0.437	0.005	0	Alveolar Macrophages	Rnf180
Htr2c	0	0.426904	0.334	0	0	Alveolar Macrophages	Htr2c
Nol4l	0	0.425466	0.473	0.018	0	Alveolar Macrophages	Nol4l
Xrcc5	0	0.421011	0.419	0.016	0	Alveolar Macrophages	Xrcc5
Slc38a7	0	0.42077	0.491	0.037	0	Alveolar Macrophages	Slc38a7
Tcaf1	0	0.418753	0.442	0.027	0	Alveolar Macrophages	Tcaf1
Cdh1	0	0.417208	0.38	0.017	0	Alveolar Macrophages	Cdh1
Reps2	0	0.415313	0.463	0.018	0	Alveolar Macrophages	Reps2
Slc27a1	0	0.41242	0.409	0.016	0	Alveolar Macrophages	Slc27a1
Gm41307	0	0.41095	0.388	0.002	0	Alveolar Macrophages	Gm41307
Tnfrsf26	0	0.404006	0.476	0.025	0	Alveolar Macrophages	Tnfrsf26
Patj	0	0.400522	0.388	0.012	0	Alveolar Macrophages	Patj
Slc38a6	0	0.398407	0.496	0.039	0	Alveolar Macrophages	Slc38a6
Pex11a	0	0.398358	0.398	0.017	0	Alveolar Macrophages	Pex11a
Coro6	0	0.391602	0.383	0.003	0	Alveolar Macrophages	Coro6
Celf4	0	0.388658	0.383	0.02	0	Alveolar Macrophages	Celf4
Tpbgl	0	0.388296	0.406	0.004	0	Alveolar Macrophages	Tpbgl
Hspa12a	0	0.386607	0.391	0.006	0	Alveolar Macrophages	Hspa12a
Adgrl2	0	0.385304	0.671	0.073	0	Alveolar Macrophages	Adgrl2
Slc22a17	0	0.384976	0.416	0.011	0	Alveolar Macrophages	Slc22a17
Ctsf	0	0.384761	0.463	0.02	0	Alveolar Macrophages	Ctsf
Afp	0	0.381995	0.36	0.001	0	Alveolar Macrophages	Afp
Echdc1	0	0.38155	0.455	0.033	0	Alveolar Macrophages	Echdc1
Tmem273	0	0.381496	0.416	0.018	0	Alveolar Macrophages	Tmem273
E2f1	0	0.378639	0.409	0.018	0	Alveolar Macrophages	E2f1
Rab7b	0	0.376464	0.416	0.025	0	Alveolar Macrophages	Rab7b
2022-09-08	0	0.370714	0.478	0.038	0	Alveolar Macrophages	2022-09-08
Rims3	0	0.370391	0.44	0.013	0	Alveolar Macrophages	Rims3
Enpp1	0	0.367612	0.396	0.014	0	Alveolar Macrophages	Enpp1
Mical3	0	0.367343	0.445	0.026	0	Alveolar Macrophages	Mical3
Trim47	0	0.365481	0.434	0.023	0	Alveolar Macrophages	Trim47
Large1	0	0.363935	0.398	0.017	0	Alveolar Macrophages	Large1
Tmem138	0	0.363727	0.447	0.029	0	Alveolar Macrophages	Tmem138
Mapre3	0	0.358304	0.47	0.035	0	Alveolar Macrophages	Mapre3
Trim29	0	0.35747	0.342	0	0	Alveolar Macrophages	Trim29
A930007I19Rik	0	0.354925	0.355	0.018	0	Alveolar Macrophages	A930007I19Rik
Matn2	0	0.353991	0.347	0.003	0	Alveolar Macrophages	Matn2
Mccc2	0	0.342079	0.393	0.019	0	Alveolar Macrophages	Mccc2
Siglec1	0	0.33633	0.362	0.003	0	Alveolar Macrophages	Siglec1
Ucp3	0	0.336326	0.339	0.001	0	Alveolar Macrophages	Ucp3
Synj2	0	0.334737	0.404	0.023	0	Alveolar Macrophages	Synj2
Kynu	0	0.330698	0.406	0.025	0	Alveolar Macrophages	Kynu
Tacc2	0	0.330577	0.393	0.014	0	Alveolar Macrophages	Tacc2
Nrn1	0	0.327837	0.362	0.004	0	Alveolar Macrophages	Nrn1
Spire1	0	0.327082	0.386	0.012	0	Alveolar Macrophages	Spire1
Gpr157	0	0.323161	0.344	0.005	0	Alveolar Macrophages	Gpr157
Pld2	0	0.321314	0.401	0.024	0	Alveolar Macrophages	Pld2
Gas2l3	0	0.319992	0.311	0.015	0	Alveolar Macrophages	Gas2l3
Fam189a2	0	0.312304	0.35	0.019	0	Alveolar Macrophages	Fam189a2
Hr	0	0.30746	0.262	0.002	0	Alveolar Macrophages	Hr
Marveld2	0	0.302011	0.362	0.009	0	Alveolar Macrophages	Marveld2
Mak	0	0.28862	0.344	0.002	0	Alveolar Macrophages	Mak
Tmem151a	0	0.286359	0.27	0.004	0	Alveolar Macrophages	Tmem151a
Slc39a14	0	0.283509	0.378	0.023	0	Alveolar Macrophages	Slc39a14
Klra3	0	0.28109	0.388	0.012	0	Alveolar Macrophages	Klra3
Vdr	0	0.280399	0.308	0.004	0	Alveolar Macrophages	Vdr
Epb41l1	0	0.279978	0.344	0.009	0	Alveolar Macrophages	Epb41l1
1700003F12Rik	0	0.275978	0.28	0.001	0	Alveolar Macrophages	1700003F12Rik
Rab3il1	0	0.274343	0.311	0.017	0	Alveolar Macrophages	Rab3il1
Rpusd3	0	0.27354	0.303	0.013	0	Alveolar Macrophages	Rpusd3
Oaf	0	0.270796	0.311	0.013	0	Alveolar Macrophages	Oaf
Hic2	0	0.269379	0.352	0.017	0	Alveolar Macrophages	Hic2
Abhd3	0	0.26579	0.298	0.002	0	Alveolar Macrophages	Abhd3
Ppnr	0	0.262468	0.283	0.004	0	Alveolar Macrophages	Ppnr
Tanc2	0	0.251525	0.308	0.01	0	Alveolar Macrophages	Tanc2
Bend6	0	0.251439	0.267	0.003	0	Alveolar Macrophages	Bend6
Bzw2	5.09145e-308	0.6859	0.74	0.103	9.62488e-304	Alveolar Macrophages	Bzw2
Mcoln1	6.8711e-305	0.37415	0.499	0.046	1.29891e-300	Alveolar Macrophages	Mcoln1
Ptprs	1.20138e-304	0.395463	0.47	0.041	2.27108e-300	Alveolar Macrophages	Ptprs
Trio	2.56946e-304	0.648664	0.72	0.1	4.85731e-300	Alveolar Macrophages	Trio
C2cd2l	4.18317e-303	0.584618	0.622	0.074	7.90787e-299	Alveolar Macrophages	C2cd2l
Acp5	8.73908e-303	0.841533	0.769	0.113	1.65203e-298	Alveolar Macrophages	Acp5
Pde4dip	4.34077e-302	0.382962	0.494	0.046	8.20579e-298	Alveolar Macrophages	Pde4dip
Eepd1	5.33618e-301	0.533455	0.599	0.068	1.00875e-296	Alveolar Macrophages	Eepd1
Adrb1	1.63213e-300	0.52837	0.71	0.089	3.08538e-296	Alveolar Macrophages	Adrb1
Zfp992	4.24487e-300	0.373281	0.424	0.035	8.0245e-296	Alveolar Macrophages	Zfp992
Nup210	6.33078e-300	0.567155	0.689	0.09	1.19677e-295	Alveolar Macrophages	Nup210
Itgb5	3.85931e-299	0.598214	0.761	0.109	7.29565e-295	Alveolar Macrophages	Itgb5
Nrip1	9.02252e-298	1.15884	0.892	0.171	1.70562e-293	Alveolar Macrophages	Nrip1
Arhgap39	3.25037e-297	0.521476	0.627	0.076	6.14451e-293	Alveolar Macrophages	Arhgap39
Ccdc86	3.81011e-296	0.802857	0.784	0.125	7.20263e-292	Alveolar Macrophages	Ccdc86
Tmem41a	2.4924e-295	0.254899	0.337	0.021	4.71164e-291	Alveolar Macrophages	Tmem41a
Idh1	3.00667e-293	1.24942	0.918	0.202	5.68381e-289	Alveolar Macrophages	Idh1
Naaa	4.63149e-293	1.64487	0.967	0.261	8.75536e-289	Alveolar Macrophages	Naaa
Frrs1	4.49277e-290	0.742748	0.738	0.114	8.49313e-286	Alveolar Macrophages	Frrs1
Vav2	5.67696e-289	0.328172	0.434	0.037	1.07317e-284	Alveolar Macrophages	Vav2
Zfand2a	2.41255e-288	0.533322	0.607	0.073	4.56068e-284	Alveolar Macrophages	Zfand2a
Mgst3	4.37791e-288	0.764072	0.748	0.116	8.276e-284	Alveolar Macrophages	Mgst3
Cdkl2	1.25114e-285	0.286678	0.324	0.02	2.36516e-281	Alveolar Macrophages	Cdkl2
Emc1	8.06133e-285	0.455047	0.594	0.07	1.52391e-280	Alveolar Macrophages	Emc1
Atic	1.1378e-284	0.524096	0.612	0.076	2.15089e-280	Alveolar Macrophages	Atic
Adipor2	4.93355e-284	1.91316	0.974	0.324	9.32639e-280	Alveolar Macrophages	Adipor2
Manba	1.16296e-283	0.476717	0.56	0.064	2.19845e-279	Alveolar Macrophages	Manba
Ski	2.57108e-282	1.13988	0.907	0.19	4.86037e-278	Alveolar Macrophages	Ski
Dpagt1	4.68463e-282	0.407781	0.55	0.062	8.85583e-278	Alveolar Macrophages	Dpagt1
Acads	5.92098e-281	0.631053	0.728	0.111	1.1193e-276	Alveolar Macrophages	Acads
Nus1	1.14602e-280	0.881518	0.838	0.153	2.16644e-276	Alveolar Macrophages	Nus1
Hspa9	2.51809e-280	0.926432	0.874	0.167	4.7602e-276	Alveolar Macrophages	Hspa9
Ppargc1b	5.4734e-278	0.276268	0.319	0.02	1.03469e-273	Alveolar Macrophages	Ppargc1b
Rora	4.97468e-276	0.376316	0.501	0.051	9.40413e-272	Alveolar Macrophages	Rora
Rcbtb2	1.65969e-275	0.701972	0.735	0.115	3.13747e-271	Alveolar Macrophages	Rcbtb2
Gramd4	6.27218e-275	0.477214	0.568	0.067	1.18569e-270	Alveolar Macrophages	Gramd4
Akr1b3	3.71192e-274	1.24385	0.964	0.236	7.01701e-270	Alveolar Macrophages	Akr1b3
Il11ra1	3.75842e-274	0.317508	0.452	0.042	7.10491e-270	Alveolar Macrophages	Il11ra1
Abhd17c	2.77741e-272	0.417397	0.53	0.058	5.25042e-268	Alveolar Macrophages	Abhd17c
Arhgap31	1.04695e-271	0.43474	0.841	0.135	1.97915e-267	Alveolar Macrophages	Arhgap31
Mrtfb	2.09994e-271	0.329602	0.54	0.059	3.96973e-267	Alveolar Macrophages	Mrtfb
Slc49a4	4.95155e-271	0.55813	0.671	0.095	9.36041e-267	Alveolar Macrophages	Slc49a4
Gsap	3.67176e-269	1.24148	0.943	0.234	6.94109e-265	Alveolar Macrophages	Gsap
Gas2l1	1.38831e-267	0.47541	0.594	0.075	2.62445e-263	Alveolar Macrophages	Gas2l1
Mpeg1	6.22024e-267	2.04376	0.977	0.328	1.17587e-262	Alveolar Macrophages	Mpeg1
Rgl1	9.77427e-267	0.369745	0.519	0.055	1.84773e-262	Alveolar Macrophages	Rgl1
Cybb	1.35857e-266	2.60656	0.979	0.351	2.56825e-262	Alveolar Macrophages	Cybb
Agfg2	6.78831e-266	0.404646	0.465	0.047	1.28326e-261	Alveolar Macrophages	Agfg2
Ado	6.49542e-265	0.484156	0.584	0.073	1.22789e-260	Alveolar Macrophages	Ado
Pdlim1	8.69757e-265	1.01211	0.918	0.192	1.64419e-260	Alveolar Macrophages	Pdlim1
Alg9	4.64967e-264	0.301792	0.38	0.031	8.78974e-260	Alveolar Macrophages	Alg9
Ermp1	7.478e-264	0.545752	0.627	0.085	1.41364e-259	Alveolar Macrophages	Ermp1
Anxa5	8.00601e-264	1.93647	0.982	0.333	1.51346e-259	Alveolar Macrophages	Anxa5
Dse	1.59714e-263	0.501629	0.563	0.069	3.01923e-259	Alveolar Macrophages	Dse
Dpep2	1.76361e-263	0.533052	0.578	0.073	3.33392e-259	Alveolar Macrophages	Dpep2
Nmt2	1.93154e-263	0.408442	0.566	0.068	3.65139e-259	Alveolar Macrophages	Nmt2
Tpp1	4.30908e-263	1.05542	0.92	0.208	8.14589e-259	Alveolar Macrophages	Tpp1
Rnf144b	1.02556e-262	0.355639	0.452	0.045	1.93871e-258	Alveolar Macrophages	Rnf144b
Myo9a	1.74867e-262	0.501623	0.594	0.076	3.30568e-258	Alveolar Macrophages	Myo9a
Gaa	8.39592e-262	0.521637	0.679	0.1	1.58716e-257	Alveolar Macrophages	Gaa
Ctss	1.38565e-261	2.68883	0.985	0.425	2.61943e-257	Alveolar Macrophages	Ctss
Mt2	1.16013e-260	1.28825	0.257	0.014	2.19312e-256	Alveolar Macrophages	Mt2
Runx2	1.54397e-259	0.598441	0.738	0.116	2.91872e-255	Alveolar Macrophages	Runx2
Gab2	1.71499e-259	0.686977	0.802	0.139	3.24203e-255	Alveolar Macrophages	Gab2
Ch25h	2.26207e-258	0.313861	0.141	0.003	4.27622e-254	Alveolar Macrophages	Ch25h
Mdfic	2.82205e-258	0.5198	0.638	0.089	5.3348e-254	Alveolar Macrophages	Mdfic
Slc39a10	5.12109e-257	0.452591	0.568	0.071	9.6809e-253	Alveolar Macrophages	Slc39a10
Pon2	6.28253e-256	1.06043	0.946	0.235	1.18765e-251	Alveolar Macrophages	Pon2
Tgfbr2	2.44639e-253	1.40882	0.961	0.276	4.62466e-249	Alveolar Macrophages	Tgfbr2
Dusp3	2.91032e-253	0.916976	0.907	0.191	5.50167e-249	Alveolar Macrophages	Dusp3
Wdfy4	8.74697e-253	0.822235	0.823	0.162	1.65353e-248	Alveolar Macrophages	Wdfy4
Rnd3	1.09376e-252	0.614661	0.55	0.069	2.06765e-248	Alveolar Macrophages	Rnd3
Acp2	1.12824e-252	0.43313	0.55	0.068	2.13282e-248	Alveolar Macrophages	Acp2
Tnpo2	1.30886e-252	0.395859	0.522	0.061	2.47426e-248	Alveolar Macrophages	Tnpo2
Tifab	4.88525e-252	0.808874	0.825	0.146	9.23507e-248	Alveolar Macrophages	Tifab
Idh2	6.22809e-252	0.61528	0.771	0.131	1.17736e-247	Alveolar Macrophages	Idh2
Tmem135	1.83493e-251	0.456495	0.555	0.07	3.46875e-247	Alveolar Macrophages	Tmem135
Mfhas1	2.11657e-251	0.368105	0.578	0.072	4.00116e-247	Alveolar Macrophages	Mfhas1
Sh3bgrl	2.14933e-251	1.56861	0.977	0.314	4.0631e-247	Alveolar Macrophages	Sh3bgrl
Snx10	7.04299e-251	1.2809	0.954	0.272	1.33141e-246	Alveolar Macrophages	Snx10
Gba	9.5739e-251	0.57799	0.697	0.112	1.80985e-246	Alveolar Macrophages	Gba
Hexa	1.27602e-250	1.71458	0.977	0.39	2.41219e-246	Alveolar Macrophages	Hexa
Akr1c13	1.70792e-250	0.291687	0.311	0.022	3.22865e-246	Alveolar Macrophages	Akr1c13
Slc39a11	2.52852e-249	0.33483	0.452	0.047	4.77991e-245	Alveolar Macrophages	Slc39a11
Myo1e	9.36476e-249	0.318701	0.509	0.057	1.77031e-244	Alveolar Macrophages	Myo1e
G6pc3	2.49632e-248	0.367661	0.486	0.054	4.71904e-244	Alveolar Macrophages	G6pc3
Ptpn12	2.58592e-248	1.72723	0.972	0.362	4.88842e-244	Alveolar Macrophages	Ptpn12
Tgm2	3.73916e-247	0.667971	0.771	0.128	7.0685e-243	Alveolar Macrophages	Tgm2
Prdx1	1.71589e-246	2.1913	0.992	0.446	3.24371e-242	Alveolar Macrophages	Prdx1
Cd9	4.76659e-246	2.74053	0.992	0.555	9.01076e-242	Alveolar Macrophages	Cd9
Sirpa	9.14946e-246	2.25673	0.982	0.544	1.72961e-241	Alveolar Macrophages	Sirpa
Sgk1	9.96636e-246	2.51619	0.982	0.408	1.88404e-241	Alveolar Macrophages	Sgk1
Dnase1l1	1.14882e-245	0.556357	0.704	0.114	2.17173e-241	Alveolar Macrophages	Dnase1l1
Pwwp2b	1.9099e-245	0.26458	0.393	0.035	3.61047e-241	Alveolar Macrophages	Pwwp2b
Aldh9a1	7.76718e-245	0.555761	0.681	0.108	1.46831e-240	Alveolar Macrophages	Aldh9a1
Fam122b	1.14653e-244	0.250295	0.283	0.018	2.16741e-240	Alveolar Macrophages	Fam122b
Plxnc1	2.24375e-244	0.578265	0.656	0.101	4.24158e-240	Alveolar Macrophages	Plxnc1
Tcirg1	1.66878e-243	0.842016	0.874	0.185	3.15466e-239	Alveolar Macrophages	Tcirg1
Fam129b	1.12229e-242	0.523041	0.645	0.096	2.12158e-238	Alveolar Macrophages	Fam129b
Cryl1	1.25115e-242	0.353534	0.481	0.054	2.36518e-238	Alveolar Macrophages	Cryl1
Cpt1a	1.74782e-242	1.08546	0.923	0.236	3.30409e-238	Alveolar Macrophages	Cpt1a
Gatm	2.57945e-241	0.729474	0.82	0.149	4.87618e-237	Alveolar Macrophages	Gatm
Trf	9.38273e-241	1.97769	0.987	0.396	1.77371e-236	Alveolar Macrophages	Trf
Tulp4	1.95854e-240	0.569758	0.717	0.114	3.70243e-236	Alveolar Macrophages	Tulp4
Ctsd	3.68661e-240	2.5472	0.997	0.824	6.96916e-236	Alveolar Macrophages	Ctsd
Rab44	8.79936e-240	0.481621	0.586	0.081	1.66343e-235	Alveolar Macrophages	Rab44
Mfsd1	1.21341e-239	0.877721	0.895	0.201	2.29382e-235	Alveolar Macrophages	Mfsd1
Naa50	2.16539e-238	0.949135	0.879	0.198	4.09346e-234	Alveolar Macrophages	Naa50
Fam91a1	5.02735e-238	0.505498	0.632	0.095	9.5037e-234	Alveolar Macrophages	Fam91a1
Tex264	1.70721e-237	0.509823	0.679	0.107	3.22731e-233	Alveolar Macrophages	Tex264
Slc37a2	2.45682e-237	0.356205	0.434	0.045	4.64437e-233	Alveolar Macrophages	Slc37a2
Usp14	2.48006e-237	0.641648	0.746	0.132	4.6883e-233	Alveolar Macrophages	Usp14
M6pr	2.7417e-237	1.31561	0.956	0.288	5.18291e-233	Alveolar Macrophages	M6pr
Bcap29	2.69336e-236	0.467264	0.589	0.082	5.09153e-232	Alveolar Macrophages	Bcap29
Ccl6	8.93896e-236	2.85068	0.995	0.532	1.68982e-231	Alveolar Macrophages	Ccl6
Wdr11	9.68074e-235	0.364102	0.447	0.049	1.83005e-230	Alveolar Macrophages	Wdr11
Adcy7	1.16969e-234	0.758895	0.83	0.168	2.21118e-230	Alveolar Macrophages	Adcy7
Ddhd1	4.76515e-234	0.693233	0.792	0.147	9.00804e-230	Alveolar Macrophages	Ddhd1
Specc1	3.33928e-233	0.492085	0.599	0.087	6.31258e-229	Alveolar Macrophages	Specc1
Naga	6.31589e-233	0.774608	0.846	0.176	1.19396e-228	Alveolar Macrophages	Naga
Pepd	7.41261e-233	0.555666	0.697	0.117	1.40128e-228	Alveolar Macrophages	Pepd
Canx	7.90977e-233	1.53425	0.974	0.338	1.49526e-228	Alveolar Macrophages	Canx
Cyb5r3	9.73317e-233	0.946626	0.949	0.238	1.83996e-228	Alveolar Macrophages	Cyb5r3
Phlda1	4.02946e-232	0.762491	0.728	0.13	7.61729e-228	Alveolar Macrophages	Phlda1
Smarcal1	4.47895e-232	0.271436	0.365	0.033	8.467e-228	Alveolar Macrophages	Smarcal1
Mettl14	9.88327e-232	0.321008	0.442	0.047	1.86833e-227	Alveolar Macrophages	Mettl14
Tnfsf12	1.64e-231	0.537241	0.692	0.113	3.10025e-227	Alveolar Macrophages	Tnfsf12
Gabarapl1	5.118e-231	0.58726	0.763	0.136	9.67507e-227	Alveolar Macrophages	Gabarapl1
Igsf8	1.01717e-230	0.799006	0.877	0.188	1.92286e-226	Alveolar Macrophages	Igsf8
Tnfrsf21	3.15876e-230	0.76885	0.802	0.165	5.97133e-226	Alveolar Macrophages	Tnfrsf21
Cd68	3.9825e-230	1.67598	0.974	0.354	7.52851e-226	Alveolar Macrophages	Cd68
Rps6ka3	1.45309e-229	0.963879	0.866	0.204	2.74691e-225	Alveolar Macrophages	Rps6ka3
Nfix	5.68698e-229	0.646971	0.769	0.143	1.07507e-224	Alveolar Macrophages	Nfix
Fam168a	7.3565e-229	0.784576	0.815	0.168	1.39067e-224	Alveolar Macrophages	Fam168a
Mgat4a	1.16536e-228	0.473872	0.638	0.096	2.20299e-224	Alveolar Macrophages	Mgat4a
Pnpla8	1.175e-228	1.33557	0.959	0.317	2.22122e-224	Alveolar Macrophages	Pnpla8
Sowahc	1.73768e-228	0.727999	0.748	0.137	3.28491e-224	Alveolar Macrophages	Sowahc
Clic4	3.41574e-228	0.916278	0.967	0.23	6.45711e-224	Alveolar Macrophages	Clic4
Galns	9.9493e-228	0.450053	0.548	0.076	1.88082e-223	Alveolar Macrophages	Galns
Vkorc1l1	4.12069e-227	0.448597	0.589	0.086	7.78975e-223	Alveolar Macrophages	Vkorc1l1
Gstm1	8.44355e-226	0.779848	0.895	0.193	1.59617e-221	Alveolar Macrophages	Gstm1
Smad1	1.31597e-225	0.510925	0.656	0.106	2.48771e-221	Alveolar Macrophages	Smad1
Laptm5	4.56638e-225	2.04656	0.985	0.765	8.63229e-221	Alveolar Macrophages	Laptm5
Scimp	6.15468e-225	0.375444	0.648	0.095	1.16348e-220	Alveolar Macrophages	Scimp
Sh3bp2	1.04901e-224	0.585824	0.74	0.135	1.98306e-220	Alveolar Macrophages	Sh3bp2
Pwwp3a	8.47121e-224	0.498302	0.594	0.088	1.6014e-219	Alveolar Macrophages	Pwwp3a
Kif13a	2.06825e-223	0.293014	0.422	0.045	3.90981e-219	Alveolar Macrophages	Kif13a
Mybbp1a	4.89466e-223	0.548256	0.679	0.114	9.25287e-219	Alveolar Macrophages	Mybbp1a
Plin2	9.70586e-223	2.15335	0.995	0.574	1.8348e-218	Alveolar Macrophages	Plin2
Ccdc88a	1.03395e-222	0.869706	0.843	0.178	1.95458e-218	Alveolar Macrophages	Ccdc88a
Zbtb4	1.71674e-222	0.404026	0.658	0.101	3.24533e-218	Alveolar Macrophages	Zbtb4
Cd200r1	8.45812e-222	0.789417	0.797	0.168	1.59892e-217	Alveolar Macrophages	Cd200r1
Cdk14	1.15654e-221	0.406914	0.594	0.085	2.18633e-217	Alveolar Macrophages	Cdk14
Tmem168	3.21718e-221	0.603883	0.697	0.123	6.08176e-217	Alveolar Macrophages	Tmem168
Rasal2	3.77374e-221	0.329265	0.573	0.079	7.13388e-217	Alveolar Macrophages	Rasal2
Lgals3bp	8.93838e-221	0.536486	0.645	0.103	1.68971e-216	Alveolar Macrophages	Lgals3bp
Man2b2	2.71223e-220	0.338571	0.494	0.062	5.1272e-216	Alveolar Macrophages	Man2b2
Ptms	3.20517e-220	1.73184	0.987	0.408	6.05905e-216	Alveolar Macrophages	Ptms
Rragc	9.66868e-220	0.844907	0.905	0.217	1.82777e-215	Alveolar Macrophages	Rragc
Washc5	1.06745e-219	0.367046	0.519	0.068	2.0179e-215	Alveolar Macrophages	Washc5
Parvg	1.3066e-219	0.543462	0.653	0.109	2.47e-215	Alveolar Macrophages	Parvg
Plcb2	1.3982e-219	0.531157	0.643	0.105	2.64316e-215	Alveolar Macrophages	Plcb2
Sumf1	3.63258e-218	0.42364	0.576	0.085	6.86704e-214	Alveolar Macrophages	Sumf1
Slc6a6	6.16467e-218	1.63778	0.969	0.426	1.16537e-213	Alveolar Macrophages	Slc6a6
Cd81	1.06621e-217	0.374412	0.815	0.151	2.01556e-213	Alveolar Macrophages	Cd81
Ctsz	2.70705e-217	1.89513	0.992	0.583	5.11741e-213	Alveolar Macrophages	Ctsz
Hnrnpll	3.20611e-217	0.737637	0.81	0.17	6.06083e-213	Alveolar Macrophages	Hnrnpll
1700017B05Rik	4.02862e-217	0.393832	0.555	0.078	7.6157e-213	Alveolar Macrophages	1700017B05Rik
Rnaseh2b	5.17032e-217	0.288844	0.396	0.041	9.77398e-213	Alveolar Macrophages	Rnaseh2b
Naip5	5.85757e-217	0.360919	0.44	0.051	1.10731e-212	Alveolar Macrophages	Naip5
Capn2	8.65617e-217	0.709264	0.789	0.16	1.63636e-212	Alveolar Macrophages	Capn2
Gnl3	1.2452e-216	0.482356	0.684	0.113	2.35393e-212	Alveolar Macrophages	Gnl3
Rem1	4.95921e-216	0.268796	0.201	0.01	9.37488e-212	Alveolar Macrophages	Rem1
Marveld1	5.53611e-216	0.378256	0.514	0.067	1.04655e-211	Alveolar Macrophages	Marveld1
Cisd1	8.63583e-216	0.697733	0.799	0.161	1.63252e-211	Alveolar Macrophages	Cisd1
P2ry6	1.28904e-215	0.501901	0.63	0.101	2.4368e-211	Alveolar Macrophages	P2ry6
Prkcsh	6.69059e-215	0.62031	0.781	0.155	1.26479e-210	Alveolar Macrophages	Prkcsh
Esyt2	1.307e-214	0.748499	0.805	0.168	2.47075e-210	Alveolar Macrophages	Esyt2
Mpp6	1.31177e-214	0.601954	0.694	0.124	2.47977e-210	Alveolar Macrophages	Mpp6
Noct	1.88349e-214	0.587442	0.663	0.116	3.56055e-210	Alveolar Macrophages	Noct
Wdr41	2.15699e-214	0.359445	0.458	0.056	4.07757e-210	Alveolar Macrophages	Wdr41
Uhmk1	5.19894e-214	0.548076	0.694	0.126	9.82807e-210	Alveolar Macrophages	Uhmk1
Lpp	7.88396e-214	0.773695	0.823	0.175	1.49038e-209	Alveolar Macrophages	Lpp
Mfsd5	8.00006e-214	0.618763	0.756	0.148	1.51233e-209	Alveolar Macrophages	Mfsd5
Abce1	1.02678e-213	0.487568	0.676	0.115	1.94102e-209	Alveolar Macrophages	Abce1
Hsd17b12	1.62527e-213	0.744679	0.807	0.17	3.07241e-209	Alveolar Macrophages	Hsd17b12
Ctnnd1	3.62274e-213	0.454081	0.763	0.141	6.84843e-209	Alveolar Macrophages	Ctnnd1
Ptpmt1	5.29812e-213	0.450639	0.627	0.102	1.00156e-208	Alveolar Macrophages	Ptpmt1
Lgals3	2.84854e-212	2.1536	1	0.598	5.38488e-208	Alveolar Macrophages	Lgals3
Hspbp1	3.4007e-212	0.302428	0.463	0.056	6.42868e-208	Alveolar Macrophages	Hspbp1
Slc23a2	6.14061e-212	0.29486	0.45	0.053	1.16082e-207	Alveolar Macrophages	Slc23a2
Hs1bp3	1.42686e-211	0.299269	0.391	0.041	2.69734e-207	Alveolar Macrophages	Hs1bp3
Pld1	1.48518e-210	0.358402	0.473	0.061	2.80759e-206	Alveolar Macrophages	Pld1
Sec24a	1.68326e-210	0.380781	0.512	0.069	3.18204e-206	Alveolar Macrophages	Sec24a
Aprt	2.42636e-210	1.54642	0.979	0.399	4.5868e-206	Alveolar Macrophages	Aprt
Capg	4.57685e-210	1.40973	0.967	0.328	8.65208e-206	Alveolar Macrophages	Capg
Reep5	9.96297e-210	1.66629	0.992	0.626	1.8834e-205	Alveolar Macrophages	Reep5
Mroh1	1.25623e-209	0.477332	0.658	0.112	2.37477e-205	Alveolar Macrophages	Mroh1
Rasgef1b	1.33423e-209	0.604024	0.463	0.058	2.52222e-205	Alveolar Macrophages	Rasgef1b
Agap1	1.49595e-209	0.612686	0.643	0.108	2.82795e-205	Alveolar Macrophages	Agap1
Uxs1	1.59666e-209	0.425979	0.594	0.093	3.01832e-205	Alveolar Macrophages	Uxs1
Ddb1	3.29684e-209	0.6326	0.835	0.18	6.23235e-205	Alveolar Macrophages	Ddb1
Ehmt2	5.03157e-209	0.589023	0.681	0.123	9.51167e-205	Alveolar Macrophages	Ehmt2
B4galt1	5.82982e-209	0.793305	0.841	0.195	1.10207e-204	Alveolar Macrophages	B4galt1
Cenpb	6.66383e-208	0.971735	0.931	0.273	1.25973e-203	Alveolar Macrophages	Cenpb
Zfp991	1.84592e-207	0.270875	0.326	0.029	3.48953e-203	Alveolar Macrophages	Zfp991
Snx5	2.20596e-207	0.914015	0.928	0.237	4.17015e-203	Alveolar Macrophages	Snx5
Ids	2.93983e-207	0.553158	0.74	0.141	5.55745e-203	Alveolar Macrophages	Ids
Cln8	6.22312e-207	0.48822	0.568	0.088	1.17642e-202	Alveolar Macrophages	Cln8
Vegfb	2.07856e-206	0.266245	0.357	0.035	3.92931e-202	Alveolar Macrophages	Vegfb
Adi1	3.96404e-206	0.312621	0.422	0.048	7.49362e-202	Alveolar Macrophages	Adi1
Bhlhe40	4.04645e-206	0.95938	0.879	0.214	7.64942e-202	Alveolar Macrophages	Bhlhe40
Hipk2	7.65792e-206	0.510921	0.671	0.12	1.44765e-201	Alveolar Macrophages	Hipk2
Vopp1	1.67823e-205	0.343286	0.481	0.062	3.17253e-201	Alveolar Macrophages	Vopp1
Lmbrd2	2.21715e-204	0.282895	0.411	0.047	4.19131e-200	Alveolar Macrophages	Lmbrd2
Clasp2	4.06402e-204	0.374919	0.56	0.084	7.68261e-200	Alveolar Macrophages	Clasp2
Psap	5.00763e-204	2.36837	0.987	0.726	9.46642e-200	Alveolar Macrophages	Psap
Arl8b	7.54512e-204	0.812914	0.877	0.218	1.42633e-199	Alveolar Macrophages	Arl8b
Sgpl1	1.09938e-203	0.876995	0.892	0.233	2.07827e-199	Alveolar Macrophages	Sgpl1
Gm1673	4.24263e-203	0.53979	0.506	0.073	8.02027e-199	Alveolar Macrophages	Gm1673
Dock4	6.79894e-203	0.410866	0.584	0.091	1.28527e-198	Alveolar Macrophages	Dock4
Pigs	1.04181e-202	0.556706	0.689	0.129	1.96944e-198	Alveolar Macrophages	Pigs
Rab11fip5	4.18138e-202	0.308217	0.424	0.05	7.90449e-198	Alveolar Macrophages	Rab11fip5
Eef1akmt4	4.85965e-202	0.25231	0.355	0.035	9.18668e-198	Alveolar Macrophages	Eef1akmt4
Ppp2r1b	6.6452e-202	0.288738	0.398	0.044	1.25621e-197	Alveolar Macrophages	Ppp2r1b
Aebp2	1.05426e-201	0.581431	0.743	0.145	1.99298e-197	Alveolar Macrophages	Aebp2
Hip1	1.49593e-201	0.908339	0.905	0.24	2.82791e-197	Alveolar Macrophages	Hip1
Hcar2	2.02395e-201	0.636679	0.787	0.156	3.82608e-197	Alveolar Macrophages	Hcar2
Csf2rb2	5.06964e-200	0.827632	0.871	0.219	9.58366e-196	Alveolar Macrophages	Csf2rb2
Etfa	9.41847e-200	0.74449	0.825	0.191	1.78047e-195	Alveolar Macrophages	Etfa
Akr1a1	1.13952e-199	1.52166	0.985	0.502	2.15415e-195	Alveolar Macrophages	Akr1a1
Stom	3.71671e-199	0.674711	0.738	0.155	7.02606e-195	Alveolar Macrophages	Stom
Fam126a	9.78733e-199	0.408771	0.581	0.093	1.8502e-194	Alveolar Macrophages	Fam126a
Aplp2	1.5588e-198	1.46306	0.969	0.401	2.94675e-194	Alveolar Macrophages	Aplp2
Rhoq	3.08028e-198	0.494857	0.663	0.119	5.82296e-194	Alveolar Macrophages	Rhoq
Slc36a1	4.04628e-198	0.37944	0.54	0.081	7.64909e-194	Alveolar Macrophages	Slc36a1
Cat	5.77993e-198	0.611435	0.743	0.151	1.09264e-193	Alveolar Macrophages	Cat
Nenf	6.01237e-198	0.459902	0.74	0.142	1.13658e-193	Alveolar Macrophages	Nenf
Irf2bp2	1.51412e-197	1.35216	0.967	0.338	2.8623e-193	Alveolar Macrophages	Irf2bp2
Trpv2	2.99188e-197	0.800085	0.877	0.22	5.65586e-193	Alveolar Macrophages	Trpv2
Galk2	3.6487e-197	0.3781	0.53	0.079	6.89749e-193	Alveolar Macrophages	Galk2
Cdc42ep3	5.09848e-197	1.73836	0.974	0.504	9.63817e-193	Alveolar Macrophages	Cdc42ep3
Pabpc4	1.77653e-196	0.305629	0.391	0.044	3.35836e-192	Alveolar Macrophages	Pabpc4
Tlr2	3.1622e-196	1.43769	0.954	0.357	5.97782e-192	Alveolar Macrophages	Tlr2
L1cam	1.27445e-195	0.507419	0.62	0.108	2.40922e-191	Alveolar Macrophages	L1cam
Ucp2	2.27634e-195	1.55846	0.997	0.805	4.30318e-191	Alveolar Macrophages	Ucp2
Etfb	3.74938e-195	1.23323	0.961	0.347	7.08783e-191	Alveolar Macrophages	Etfb
Dtx3	8.35491e-195	0.350416	0.496	0.07	1.57941e-190	Alveolar Macrophages	Dtx3
Pdia4	9.80362e-195	0.552425	0.756	0.152	1.85328e-190	Alveolar Macrophages	Pdia4
Klhl21	1.40987e-194	0.272868	0.362	0.038	2.66522e-190	Alveolar Macrophages	Klhl21
Fam129a	1.73234e-194	1.50143	0.946	0.426	3.27482e-190	Alveolar Macrophages	Fam129a
Scap	1.9098e-194	0.342196	0.488	0.068	3.61029e-190	Alveolar Macrophages	Scap
Dnajb14	6.39678e-194	0.655858	0.799	0.178	1.20925e-189	Alveolar Macrophages	Dnajb14
Noc2l	8.46094e-194	0.415774	0.545	0.084	1.59946e-189	Alveolar Macrophages	Noc2l
Nucb2	1.4581e-193	0.663173	0.728	0.153	2.7564e-189	Alveolar Macrophages	Nucb2
Mrps6	2.46511e-193	0.253893	0.396	0.045	4.66005e-189	Alveolar Macrophages	Mrps6
Sgsh	1.56103e-192	0.359137	0.488	0.069	2.95097e-188	Alveolar Macrophages	Sgsh
Dram1	3.6595e-192	0.535735	0.697	0.137	6.91792e-188	Alveolar Macrophages	Dram1
Bmf	5.65293e-192	0.315459	0.419	0.052	1.06863e-187	Alveolar Macrophages	Bmf
Dipk1a	1.06108e-191	0.757617	0.874	0.215	2.00586e-187	Alveolar Macrophages	Dipk1a
Mtm1	1.11857e-191	0.400386	0.591	0.097	2.11455e-187	Alveolar Macrophages	Mtm1
C1qbp	1.47212e-191	0.59587	0.779	0.165	2.7829e-187	Alveolar Macrophages	C1qbp
F10	3.65834e-191	0.629823	0.728	0.141	6.91573e-187	Alveolar Macrophages	F10
Gapvd1	4.19681e-191	0.670413	0.833	0.198	7.93365e-187	Alveolar Macrophages	Gapvd1
Atp6v1c1	5.06673e-191	0.84334	0.823	0.205	9.57815e-187	Alveolar Macrophages	Atp6v1c1
Kif16b	5.34997e-191	0.284021	0.386	0.044	1.01136e-186	Alveolar Macrophages	Kif16b
Lap3	7.98381e-191	0.368024	0.609	0.102	1.50926e-186	Alveolar Macrophages	Lap3
Clcn7	1.14991e-190	0.404325	0.537	0.083	2.17378e-186	Alveolar Macrophages	Clcn7
Ptpn7	2.12081e-190	0.361295	0.488	0.07	4.00918e-186	Alveolar Macrophages	Ptpn7
Fdx2	3.12447e-190	0.451726	0.653	0.119	5.90651e-186	Alveolar Macrophages	Fdx2
Gna15	8.38367e-190	0.330444	0.434	0.056	1.58485e-185	Alveolar Macrophages	Gna15
Gpr137b	8.94683e-190	0.776688	0.823	0.195	1.69131e-185	Alveolar Macrophages	Gpr137b
Grn	1.01931e-189	1.49991	0.977	0.51	1.9269e-185	Alveolar Macrophages	Grn
Slc39a1	1.03194e-189	0.739782	0.859	0.217	1.95079e-185	Alveolar Macrophages	Slc39a1
Emc8	1.05351e-189	0.634426	0.756	0.164	1.99156e-185	Alveolar Macrophages	Emc8
Lmo4	1.07345e-189	1.55954	0.979	0.499	2.02925e-185	Alveolar Macrophages	Lmo4
Ergic1	1.6274e-189	0.290276	0.411	0.049	3.07644e-185	Alveolar Macrophages	Ergic1
Acot2	2.01644e-189	0.287533	0.45	0.058	3.81188e-185	Alveolar Macrophages	Acot2
Creg1	3.35434e-189	1.58261	0.982	0.534	6.34104e-185	Alveolar Macrophages	Creg1
Tmem63b	3.57452e-189	0.298413	0.447	0.058	6.75728e-185	Alveolar Macrophages	Tmem63b
Tmem141	1.08507e-188	0.394034	0.486	0.07	2.05121e-184	Alveolar Macrophages	Tmem141
Plgrkt	1.42828e-188	0.876424	0.884	0.238	2.70003e-184	Alveolar Macrophages	Plgrkt
Ptger4	4.5757e-188	0.498323	0.548	0.087	8.64991e-184	Alveolar Macrophages	Ptger4
Pank3	4.64744e-188	0.440618	0.614	0.108	8.78551e-184	Alveolar Macrophages	Pank3
Lgals1	4.7192e-188	0.722001	0.941	0.236	8.92117e-184	Alveolar Macrophages	Lgals1
Tbc1d2	3.77629e-187	0.292773	0.357	0.039	7.13869e-183	Alveolar Macrophages	Tbc1d2
Mtln	3.98004e-187	0.542687	0.753	0.157	7.52387e-183	Alveolar Macrophages	Mtln
Lpcat3	7.82965e-187	0.6654	0.766	0.173	1.48012e-182	Alveolar Macrophages	Lpcat3
Tmem229b	9.80254e-187	0.307718	0.458	0.061	1.85307e-182	Alveolar Macrophages	Tmem229b
Prkar2a	1.08591e-186	0.423148	0.609	0.106	2.05281e-182	Alveolar Macrophages	Prkar2a
Dennd4b	1.8277e-186	0.402083	0.612	0.106	3.45509e-182	Alveolar Macrophages	Dennd4b
Slc43a2	3.03062e-186	0.661542	0.71	0.147	5.72909e-182	Alveolar Macrophages	Slc43a2
B4galnt1	5.89584e-186	1.17575	0.964	0.346	1.11455e-181	Alveolar Macrophages	B4galnt1
Slc25a1	8.00784e-186	0.453574	0.532	0.085	1.5138e-181	Alveolar Macrophages	Slc25a1
Snx30	1.89392e-185	0.358155	0.514	0.078	3.58027e-181	Alveolar Macrophages	Snx30
Slc35f6	2.76311e-185	0.421486	0.596	0.104	5.22339e-181	Alveolar Macrophages	Slc35f6
Abhd5	3.98544e-185	0.665642	0.805	0.19	7.53407e-181	Alveolar Macrophages	Abhd5
Gna12	2.52806e-184	0.36284	0.56	0.09	4.77905e-180	Alveolar Macrophages	Gna12
Cog7	1.23037e-183	0.273962	0.432	0.056	2.32589e-179	Alveolar Macrophages	Cog7
Atp6v1b2	1.45711e-183	1.33253	0.974	0.475	2.75452e-179	Alveolar Macrophages	Atp6v1b2
mt-Nd1	4.06836e-183	1.69364	0.99	0.772	7.69082e-179	Alveolar Macrophages	mt-Nd1
Ddhd2	5.90049e-183	0.357589	0.532	0.083	1.11543e-178	Alveolar Macrophages	Ddhd2
Ftl1	7.05732e-183	1.52824	1	0.984	1.33411e-178	Alveolar Macrophages	Ftl1
Nhp2	7.88556e-183	0.638578	0.82	0.192	1.49069e-178	Alveolar Macrophages	Nhp2
Mat2a	7.97623e-183	0.867431	0.918	0.257	1.50783e-178	Alveolar Macrophages	Mat2a
Vps35l	1.15764e-182	0.467802	0.63	0.116	2.18839e-178	Alveolar Macrophages	Vps35l
Gabbr1	1.18077e-182	0.254873	0.357	0.039	2.23213e-178	Alveolar Macrophages	Gabbr1
Ano6	1.29916e-182	0.492077	0.717	0.146	2.45594e-178	Alveolar Macrophages	Ano6
Pi4k2a	2.5506e-182	0.568708	0.735	0.16	4.82165e-178	Alveolar Macrophages	Pi4k2a
Ap1s1	2.87427e-182	0.539	0.733	0.157	5.43352e-178	Alveolar Macrophages	Ap1s1
Xpot	3.10095e-182	0.264786	0.427	0.055	5.86203e-178	Alveolar Macrophages	Xpot
Glb1	8.58892e-182	0.347805	0.452	0.063	1.62365e-177	Alveolar Macrophages	Glb1
Maff	1.43296e-181	0.47785	0.566	0.095	2.70886e-177	Alveolar Macrophages	Maff
Mib1	1.6626e-181	0.497957	0.697	0.141	3.14297e-177	Alveolar Macrophages	Mib1
Dpy19l4	5.05593e-181	0.262406	0.406	0.051	9.55773e-177	Alveolar Macrophages	Dpy19l4
Eif2s3x	8.45461e-181	0.676568	0.812	0.196	1.59826e-176	Alveolar Macrophages	Eif2s3x
Zdhhc21	8.64475e-181	0.449842	0.527	0.086	1.6342e-176	Alveolar Macrophages	Zdhhc21
Plxnd1	1.04025e-180	0.367819	0.53	0.084	1.96648e-176	Alveolar Macrophages	Plxnd1
Hint2	1.54123e-180	0.491769	0.722	0.149	2.91355e-176	Alveolar Macrophages	Hint2
Zfp770	2.55304e-180	0.269251	0.326	0.033	4.82627e-176	Alveolar Macrophages	Zfp770
Prdm1	4.18815e-180	0.48251	0.517	0.081	7.91729e-176	Alveolar Macrophages	Prdm1
Plekhm1	1.13411e-179	0.436482	0.658	0.126	2.14393e-175	Alveolar Macrophages	Plekhm1
Fndc3b	1.39433e-179	0.681563	0.784	0.183	2.63584e-175	Alveolar Macrophages	Fndc3b
Nhlrc3	2.53012e-179	0.30057	0.473	0.068	4.78294e-175	Alveolar Macrophages	Nhlrc3
Cbfb	7.25313e-179	0.567048	0.787	0.177	1.37113e-174	Alveolar Macrophages	Cbfb
Hadhb	7.62422e-179	0.801181	0.9	0.247	1.44128e-174	Alveolar Macrophages	Hadhb
Slc48a1	7.97013e-179	0.623204	0.766	0.175	1.50667e-174	Alveolar Macrophages	Slc48a1
Fam120a	1.24635e-178	0.796626	0.848	0.222	2.35611e-174	Alveolar Macrophages	Fam120a
Slc38a1	3.14816e-178	0.608345	0.799	0.182	5.95128e-174	Alveolar Macrophages	Slc38a1
Hspd1	5.25222e-178	0.794177	0.897	0.243	9.9288e-174	Alveolar Macrophages	Hspd1
Aga	5.52253e-178	0.353811	0.509	0.078	1.04398e-173	Alveolar Macrophages	Aga
Dmxl2	1.26333e-177	0.872912	0.91	0.261	2.3882e-173	Alveolar Macrophages	Dmxl2
Scoc	1.55067e-177	0.341644	0.553	0.09	2.93138e-173	Alveolar Macrophages	Scoc
Cd44	3.72101e-177	1.58375	0.987	0.695	7.0342e-173	Alveolar Macrophages	Cd44
Epb41l2	1.02221e-176	0.62869	0.882	0.221	1.93239e-172	Alveolar Macrophages	Epb41l2
Gmcl1	2.1957e-176	0.37078	0.563	0.094	4.15075e-172	Alveolar Macrophages	Gmcl1
Vps39	3.96816e-176	0.270062	0.442	0.06	7.5014e-172	Alveolar Macrophages	Vps39
Iars	3.64848e-175	0.304827	0.424	0.057	6.89708e-171	Alveolar Macrophages	Iars
Rpn1	5.34284e-175	0.745088	0.897	0.242	1.01001e-170	Alveolar Macrophages	Rpn1
Plin3	5.54751e-175	0.774846	0.833	0.226	1.0487e-170	Alveolar Macrophages	Plin3
Pus1	7.70497e-175	0.282642	0.452	0.064	1.45655e-170	Alveolar Macrophages	Pus1
Cln6	1.54024e-174	0.286674	0.427	0.058	2.91167e-170	Alveolar Macrophages	Cln6
Smarcc1	3.31829e-174	0.426981	0.594	0.107	6.27289e-170	Alveolar Macrophages	Smarcc1
Scd2	5.2515e-174	0.579015	0.519	0.086	9.92744e-170	Alveolar Macrophages	Scd2
Lamp1	1.84665e-173	1.45819	0.987	0.593	3.49091e-169	Alveolar Macrophages	Lamp1
Naip2	3.38464e-173	0.510087	0.64	0.127	6.39833e-169	Alveolar Macrophages	Naip2
Pdcd6ip	4.01953e-173	1.02419	0.964	0.373	7.59852e-169	Alveolar Macrophages	Pdcd6ip
Pes1	5.45067e-173	0.436921	0.596	0.11	1.03039e-168	Alveolar Macrophages	Pes1
Pld4	7.30061e-173	0.598994	0.846	0.178	1.38011e-168	Alveolar Macrophages	Pld4
Crip1	1.43781e-172	1.78074	0.992	0.433	2.71804e-168	Alveolar Macrophages	Crip1
Comtd1	1.45425e-172	0.367243	0.496	0.078	2.74911e-168	Alveolar Macrophages	Comtd1
Cstb	2.09598e-172	1.57554	0.982	0.517	3.96225e-168	Alveolar Macrophages	Cstb
Suclg2	2.2711e-172	0.325989	0.501	0.078	4.29328e-168	Alveolar Macrophages	Suclg2
Lrpprc	3.17237e-172	0.277939	0.427	0.058	5.99705e-168	Alveolar Macrophages	Lrpprc
Tbc1d9b	3.74086e-172	0.401763	0.604	0.111	7.07171e-168	Alveolar Macrophages	Tbc1d9b
mt-Nd4	1.26991e-171	1.53585	0.987	0.89	2.40064e-167	Alveolar Macrophages	mt-Nd4
Dtnbp1	1.59599e-171	0.586597	0.735	0.164	3.01705e-167	Alveolar Macrophages	Dtnbp1
Daglb	1.98275e-171	0.441747	0.663	0.133	3.74819e-167	Alveolar Macrophages	Daglb
Rras2	3.80328e-171	0.319878	0.509	0.08	7.18971e-167	Alveolar Macrophages	Rras2
Abca3	5.03564e-171	0.460167	0.756	0.166	9.51938e-167	Alveolar Macrophages	Abca3
Iffo1	5.45055e-171	0.304919	0.404	0.053	1.03037e-166	Alveolar Macrophages	Iffo1
Rbl1	8.83347e-171	0.282356	0.386	0.048	1.66988e-166	Alveolar Macrophages	Rbl1
Chka	1.02122e-170	0.45594	0.519	0.085	1.93051e-166	Alveolar Macrophages	Chka
Acox3	3.30436e-170	0.62762	0.779	0.188	6.24657e-166	Alveolar Macrophages	Acox3
Arl11	5.51505e-170	0.72553	0.843	0.222	1.04257e-165	Alveolar Macrophages	Arl11
Wdr7	1.00925e-169	0.282545	0.388	0.05	1.90789e-165	Alveolar Macrophages	Wdr7
Syncrip	1.27697e-169	0.598806	0.841	0.208	2.41398e-165	Alveolar Macrophages	Syncrip
Glul	1.82628e-169	1.02005	0.936	0.312	3.45239e-165	Alveolar Macrophages	Glul
Vps13c	2.28985e-169	0.703044	0.82	0.208	4.32873e-165	Alveolar Macrophages	Vps13c
Pcna	9.63243e-169	0.798614	0.882	0.236	1.82092e-164	Alveolar Macrophages	Pcna
Vps41	1.25463e-168	0.445418	0.627	0.124	2.37176e-164	Alveolar Macrophages	Vps41
Kif1c	1.43124e-168	0.334044	0.571	0.1	2.70561e-164	Alveolar Macrophages	Kif1c
Hivep3	2.46829e-168	0.381207	0.447	0.065	4.66605e-164	Alveolar Macrophages	Hivep3
Psme3	4.30526e-168	0.447745	0.653	0.132	8.13866e-164	Alveolar Macrophages	Psme3
Kpna3	5.85889e-168	0.369205	0.514	0.084	1.10756e-163	Alveolar Macrophages	Kpna3
Nxt2	6.21961e-168	0.283301	0.365	0.044	1.17575e-163	Alveolar Macrophages	Nxt2
Lrrc59	7.40084e-168	0.559613	0.774	0.183	1.39905e-163	Alveolar Macrophages	Lrrc59
Nagpa	1.17712e-167	0.433698	0.607	0.115	2.22523e-163	Alveolar Macrophages	Nagpa
Psen2	2.47157e-167	0.798683	0.884	0.254	4.67226e-163	Alveolar Macrophages	Psen2
Scarb2	4.00029e-167	1.11485	0.967	0.401	7.56215e-163	Alveolar Macrophages	Scarb2
Ebpl	5.70587e-167	0.448875	0.599	0.112	1.07864e-162	Alveolar Macrophages	Ebpl
Baz1a	6.56738e-167	1.23051	0.961	0.431	1.2415e-162	Alveolar Macrophages	Baz1a
Slc35b4	8.5475e-167	0.271538	0.375	0.047	1.61582e-162	Alveolar Macrophages	Slc35b4
Iqgap1	1.93434e-166	1.31961	0.979	0.854	3.65667e-162	Alveolar Macrophages	Iqgap1
Olfm1	1.99417e-166	0.480211	0.64	0.126	3.76978e-162	Alveolar Macrophages	Olfm1
Cyp4f16	2.13786e-166	0.428762	0.638	0.124	4.04141e-162	Alveolar Macrophages	Cyp4f16
Gde1	2.16324e-166	0.451198	0.692	0.144	4.08939e-162	Alveolar Macrophages	Gde1
Chchd10	3.21142e-166	0.26074	0.578	0.101	6.07087e-162	Alveolar Macrophages	Chchd10
Fbxo22	3.40978e-166	0.413429	0.604	0.114	6.44584e-162	Alveolar Macrophages	Fbxo22
Slc17a5	4.17693e-166	0.369926	0.535	0.091	7.89607e-162	Alveolar Macrophages	Slc17a5
Eprs	5.1186e-166	0.542271	0.761	0.174	9.67619e-162	Alveolar Macrophages	Eprs
Capn15	1.36333e-165	0.333417	0.45	0.067	2.57723e-161	Alveolar Macrophages	Capn15
Ncaph2	5.24045e-165	0.377949	0.617	0.117	9.90654e-161	Alveolar Macrophages	Ncaph2
Smarcc2	7.40967e-165	0.545371	0.746	0.172	1.40072e-160	Alveolar Macrophages	Smarcc2
Tuba1b	9.13459e-165	1.33109	0.967	0.418	1.7268e-160	Alveolar Macrophages	Tuba1b
F11r	2.21817e-164	0.305996	0.645	0.123	4.19323e-160	Alveolar Macrophages	F11r
Rnft1	3.39474e-164	0.421214	0.635	0.126	6.41742e-160	Alveolar Macrophages	Rnft1
Pdxk	6.50659e-164	0.324284	0.452	0.069	1.23001e-159	Alveolar Macrophages	Pdxk
Plbd2	6.86014e-164	0.381917	0.609	0.117	1.29684e-159	Alveolar Macrophages	Plbd2
Kat6b	7.48814e-164	0.399661	0.514	0.086	1.41556e-159	Alveolar Macrophages	Kat6b
Bckdk	1.23571e-163	0.338238	0.509	0.085	2.33599e-159	Alveolar Macrophages	Bckdk
D5Ertd579e	6.326e-163	0.324493	0.504	0.082	1.19587e-158	Alveolar Macrophages	D5Ertd579e
Zmpste24	2.11958e-162	0.352338	0.599	0.114	4.00685e-158	Alveolar Macrophages	Zmpste24
Ywhag	2.17116e-162	0.806203	0.9	0.282	4.10436e-158	Alveolar Macrophages	Ywhag
Fam3c	9.9982e-162	0.371644	0.681	0.137	1.89006e-157	Alveolar Macrophages	Fam3c
Ubash3b	8.53125e-161	0.572919	0.779	0.188	1.61275e-156	Alveolar Macrophages	Ubash3b
Coro1c	2.11392e-160	0.608577	0.846	0.226	3.99616e-156	Alveolar Macrophages	Coro1c
Dip2b	3.74254e-160	0.570158	0.835	0.212	7.07491e-156	Alveolar Macrophages	Dip2b
Mospd2	1.30476e-159	0.484051	0.697	0.156	2.46651e-155	Alveolar Macrophages	Mospd2
Slc35b2	2.47031e-159	0.340051	0.499	0.084	4.66987e-155	Alveolar Macrophages	Slc35b2
Lair1	2.59127e-159	0.481371	0.715	0.159	4.89853e-155	Alveolar Macrophages	Lair1
mt-Nd3	3.27585e-159	1.4289	0.977	0.541	6.19266e-155	Alveolar Macrophages	mt-Nd3
Plod3	3.39481e-159	0.667684	0.835	0.222	6.41755e-155	Alveolar Macrophages	Plod3
Fto	4.1148e-159	0.258875	0.468	0.073	7.77861e-155	Alveolar Macrophages	Fto
Syne2	4.31645e-159	0.44785	0.643	0.132	8.15981e-155	Alveolar Macrophages	Syne2
Slc25a36	5.79047e-159	0.544872	0.694	0.154	1.09463e-154	Alveolar Macrophages	Slc25a36
Tent4b	6.88643e-159	0.35659	0.571	0.105	1.30181e-154	Alveolar Macrophages	Tent4b
Dnajc15	7.88386e-159	0.499027	0.666	0.143	1.49036e-154	Alveolar Macrophages	Dnajc15
mt-Co1	1.27047e-158	0.996632	0.992	0.992	2.40169e-154	Alveolar Macrophages	mt-Co1
Eif3b	4.33199e-158	0.546549	0.748	0.177	8.18919e-154	Alveolar Macrophages	Eif3b
Mogs	5.94571e-158	0.37169	0.563	0.103	1.12398e-153	Alveolar Macrophages	Mogs
Slc15a3	6.12424e-158	1.02271	0.954	0.365	1.15773e-153	Alveolar Macrophages	Slc15a3
B4galt5	8.69219e-158	0.562717	0.776	0.191	1.64317e-153	Alveolar Macrophages	B4galt5
Elmo2	1.09532e-157	0.434346	0.697	0.151	2.07059e-153	Alveolar Macrophages	Elmo2
Tlr8	1.20258e-157	0.305017	0.388	0.053	2.27335e-153	Alveolar Macrophages	Tlr8
Pex14	1.24301e-157	0.354943	0.542	0.097	2.34979e-153	Alveolar Macrophages	Pex14
Cmtm3	1.35143e-157	0.382864	0.607	0.119	2.55475e-153	Alveolar Macrophages	Cmtm3
Vps18	2.0189e-157	0.294607	0.452	0.07	3.81654e-153	Alveolar Macrophages	Vps18
Pno1	2.55105e-157	0.349332	0.494	0.083	4.8225e-153	Alveolar Macrophages	Pno1
Mapk6	2.81106e-157	0.568875	0.645	0.144	5.31402e-153	Alveolar Macrophages	Mapk6
P2ry10b	2.84676e-157	0.34075	0.473	0.076	5.38151e-153	Alveolar Macrophages	P2ry10b
Sdhc	3.21775e-157	0.540675	0.792	0.199	6.08283e-153	Alveolar Macrophages	Sdhc
Psmd2	3.32422e-157	0.754867	0.887	0.271	6.2841e-153	Alveolar Macrophages	Psmd2
Asah1	3.41579e-157	1.0033	0.972	0.391	6.45721e-153	Alveolar Macrophages	Asah1
Vwa5a	3.5214e-157	0.502601	0.656	0.14	6.65686e-153	Alveolar Macrophages	Vwa5a
S100a10	6.67367e-157	1.17221	0.987	0.365	1.26159e-152	Alveolar Macrophages	S100a10
Golm1	6.73478e-157	0.349119	0.519	0.091	1.27314e-152	Alveolar Macrophages	Golm1
Vkorc1	2.05736e-156	0.323086	0.563	0.103	3.88923e-152	Alveolar Macrophages	Vkorc1
Hyou1	3.03417e-156	0.349044	0.54	0.097	5.73579e-152	Alveolar Macrophages	Hyou1
Snrpd1	3.48623e-156	0.708841	0.897	0.254	6.59038e-152	Alveolar Macrophages	Snrpd1
Pnpla7	7.44387e-156	0.743091	0.874	0.259	1.40719e-151	Alveolar Macrophages	Pnpla7
Iars2	8.18404e-156	0.327144	0.483	0.08	1.54711e-151	Alveolar Macrophages	Iars2
Mrpl12	8.32156e-156	0.520251	0.766	0.183	1.57311e-151	Alveolar Macrophages	Mrpl12
Pygo2	9.32264e-156	0.389364	0.578	0.11	1.76235e-151	Alveolar Macrophages	Pygo2
Larp4b	1.05829e-155	0.846163	0.907	0.301	2.00059e-151	Alveolar Macrophages	Larp4b
Ftsj3	1.52387e-155	0.300135	0.45	0.07	2.88072e-151	Alveolar Macrophages	Ftsj3
Agps	1.64423e-155	0.539519	0.743	0.181	3.10826e-151	Alveolar Macrophages	Agps
Gnptab	2.1387e-155	0.33098	0.491	0.082	4.04299e-151	Alveolar Macrophages	Gnptab
Pfkp	1.47434e-154	0.600795	0.771	0.196	2.78709e-150	Alveolar Macrophages	Pfkp
Mvd	1.73243e-154	0.360624	0.447	0.072	3.27498e-150	Alveolar Macrophages	Mvd
Mlec	1.7969e-154	0.614472	0.825	0.223	3.39686e-150	Alveolar Macrophages	Mlec
Med23	2.34199e-154	0.255904	0.314	0.036	4.42729e-150	Alveolar Macrophages	Med23
Atl3	4.49657e-154	0.473796	0.65	0.138	8.50032e-150	Alveolar Macrophages	Atl3
Hebp1	2.04467e-153	1.1584	0.985	0.477	3.86524e-149	Alveolar Macrophages	Hebp1
Zdhhc5	2.71658e-153	0.393775	0.607	0.123	5.13542e-149	Alveolar Macrophages	Zdhhc5
Clec4a3	5.64938e-153	0.637691	0.936	0.236	1.06796e-148	Alveolar Macrophages	Clec4a3
Atp13a2	6.6308e-153	0.759208	0.889	0.281	1.25349e-148	Alveolar Macrophages	Atp13a2
Ric1	7.23928e-153	0.390641	0.576	0.11	1.36851e-148	Alveolar Macrophages	Ric1
Caprin1	9.22256e-153	0.79237	0.941	0.308	1.74343e-148	Alveolar Macrophages	Caprin1
Ogdh	1.25114e-152	0.736152	0.864	0.26	2.36516e-148	Alveolar Macrophages	Ogdh
Prrc2b	1.88784e-152	0.505072	0.725	0.168	3.56877e-148	Alveolar Macrophages	Prrc2b
Nme1	1.89657e-152	0.979695	0.956	0.342	3.58527e-148	Alveolar Macrophages	Nme1
Med22	3.76823e-152	0.273391	0.396	0.056	7.12347e-148	Alveolar Macrophages	Med22
Ppp3r1	5.29668e-152	0.690361	0.861	0.254	1.00128e-147	Alveolar Macrophages	Ppp3r1
Zfyve26	6.52173e-152	0.334444	0.486	0.082	1.23287e-147	Alveolar Macrophages	Zfyve26
9130401M01Rik	1.3429e-151	0.390877	0.594	0.118	2.53862e-147	Alveolar Macrophages	9130401M01Rik
Fcgr1	1.60981e-151	0.406987	0.527	0.096	3.04318e-147	Alveolar Macrophages	Fcgr1
Arhgef11	2.44393e-151	0.297965	0.501	0.086	4.62001e-147	Alveolar Macrophages	Arhgef11
Cib2	5.16892e-151	0.63505	0.712	0.177	9.77134e-147	Alveolar Macrophages	Cib2
Txnrd1	6.24974e-151	0.694763	0.746	0.192	1.18145e-146	Alveolar Macrophages	Txnrd1
Gnaq	7.04487e-151	0.490551	0.835	0.216	1.33176e-146	Alveolar Macrophages	Gnaq
Tlnrd1	8.05245e-151	0.322957	0.591	0.116	1.52223e-146	Alveolar Macrophages	Tlnrd1
Sema4b	8.20462e-151	0.267076	0.357	0.047	1.551e-146	Alveolar Macrophages	Sema4b
Akr1b10	1.20729e-150	0.288323	0.429	0.066	2.28226e-146	Alveolar Macrophages	Akr1b10
Galnt7	1.81305e-150	0.424299	0.666	0.143	3.4274e-146	Alveolar Macrophages	Galnt7
Fyttd1	2.08576e-150	0.363756	0.568	0.11	3.94291e-146	Alveolar Macrophages	Fyttd1
H2-DMa	2.17414e-150	0.696572	0.902	0.244	4.11e-146	Alveolar Macrophages	H2-DMa
Ubqln1	2.56951e-150	0.46805	0.72	0.168	4.85739e-146	Alveolar Macrophages	Ubqln1
Stx6	2.97774e-150	0.432381	0.686	0.154	5.62911e-146	Alveolar Macrophages	Stx6
Mapk3	5.48036e-150	1.10247	0.979	0.515	1.03601e-145	Alveolar Macrophages	Mapk3
Dbi	5.73359e-150	1.37845	0.99	0.558	1.08388e-145	Alveolar Macrophages	Dbi
Ctsc	6.15358e-150	1.00066	0.979	0.362	1.16327e-145	Alveolar Macrophages	Ctsc
Mmut	6.20703e-150	0.304589	0.455	0.074	1.17338e-145	Alveolar Macrophages	Mmut
Mrpl51	6.77154e-150	0.70299	0.853	0.252	1.28009e-145	Alveolar Macrophages	Mrpl51
Fkbp1b	1.03301e-149	0.290419	0.391	0.057	1.95281e-145	Alveolar Macrophages	Fkbp1b
Ifi207	2.30059e-149	0.366002	0.535	0.098	4.34904e-145	Alveolar Macrophages	Ifi207
Fkbp2	3.388e-149	0.642294	0.835	0.225	6.40468e-145	Alveolar Macrophages	Fkbp2
Hsp90b1	6.63314e-149	1.32675	0.969	0.45	1.25393e-144	Alveolar Macrophages	Hsp90b1
Evi5	6.73751e-149	0.350411	0.576	0.113	1.27366e-144	Alveolar Macrophages	Evi5
Ftl1-ps1	8.87651e-149	0.648478	0.717	0.177	1.67802e-144	Alveolar Macrophages	Ftl1-ps1
App	9.10634e-149	1.15608	0.979	0.647	1.72146e-144	Alveolar Macrophages	App
Amdhd2	2.09717e-148	0.561909	0.733	0.179	3.96449e-144	Alveolar Macrophages	Amdhd2
Crybg1	2.45856e-148	0.362245	0.542	0.102	4.64765e-144	Alveolar Macrophages	Crybg1
Gm42418	3.93279e-148	1.20136	1	1	7.43454e-144	Alveolar Macrophages	Gm42418
Lcor	4.17485e-148	0.304725	0.476	0.08	7.89213e-144	Alveolar Macrophages	Lcor
Eif4b	7.51659e-148	0.83113	0.928	0.322	1.42094e-143	Alveolar Macrophages	Eif4b
Nfe2l1	1.11006e-147	0.513708	0.794	0.205	2.09846e-143	Alveolar Macrophages	Nfe2l1
Eif5b	1.17902e-147	0.891516	0.938	0.329	2.22883e-143	Alveolar Macrophages	Eif5b
Cep170	1.30202e-147	0.541012	0.733	0.181	2.46135e-143	Alveolar Macrophages	Cep170
Dync1h1	1.96798e-147	0.749472	0.892	0.282	3.72027e-143	Alveolar Macrophages	Dync1h1
Cerk	3.38898e-147	0.413886	0.596	0.122	6.40653e-143	Alveolar Macrophages	Cerk
Tbca	4.17545e-147	1.05657	0.964	0.474	7.89327e-143	Alveolar Macrophages	Tbca
Pigp	5.22416e-147	0.315128	0.578	0.109	9.87575e-143	Alveolar Macrophages	Pigp
Ppp1r9b	7.23425e-147	0.604156	0.866	0.244	1.36756e-142	Alveolar Macrophages	Ppp1r9b
Pa2g4	3.6911e-146	0.512515	0.751	0.186	6.97766e-142	Alveolar Macrophages	Pa2g4
Aars	4.64663e-146	0.289045	0.452	0.074	8.78399e-142	Alveolar Macrophages	Aars
Arfgef2	5.43695e-146	0.263695	0.414	0.063	1.0278e-141	Alveolar Macrophages	Arfgef2
Fnip2	5.80145e-146	0.432584	0.591	0.122	1.09671e-141	Alveolar Macrophages	Fnip2
Smarca4	9.27664e-146	0.461887	0.715	0.17	1.75366e-141	Alveolar Macrophages	Smarca4
Tmed5	1.0281e-145	1.02787	0.964	0.435	1.94353e-141	Alveolar Macrophages	Tmed5
Josd1	1.35872e-145	0.301513	0.53	0.098	2.56853e-141	Alveolar Macrophages	Josd1
Kmt5a	2.22911e-145	0.732797	0.833	0.244	4.21392e-141	Alveolar Macrophages	Kmt5a
Vps13d	2.23016e-145	0.390464	0.625	0.133	4.2159e-141	Alveolar Macrophages	Vps13d
Ifi30	2.31966e-145	0.718409	0.977	0.279	4.38508e-141	Alveolar Macrophages	Ifi30
Cpeb4	3.14379e-145	0.546396	0.689	0.165	5.94302e-141	Alveolar Macrophages	Cpeb4
Dynlt3	4.17696e-145	0.479986	0.748	0.19	7.89612e-141	Alveolar Macrophages	Dynlt3
Clcn3	6.58729e-145	0.389727	0.671	0.148	1.24526e-140	Alveolar Macrophages	Clcn3
Wdfy3	6.90498e-145	0.646399	0.753	0.202	1.30532e-140	Alveolar Macrophages	Wdfy3
Snx9	1.43042e-144	0.439253	0.666	0.152	2.70406e-140	Alveolar Macrophages	Snx9
Mrto4	1.43467e-144	0.468171	0.692	0.161	2.7121e-140	Alveolar Macrophages	Mrto4
Rpn2	1.861e-144	0.705636	0.915	0.28	3.51804e-140	Alveolar Macrophages	Rpn2
Impact	2.2151e-144	0.366265	0.517	0.095	4.18742e-140	Alveolar Macrophages	Impact
Tnpo1	5.17405e-144	0.519894	0.751	0.19	9.78102e-140	Alveolar Macrophages	Tnpo1
Fuom	5.36398e-144	0.289034	0.388	0.058	1.01401e-139	Alveolar Macrophages	Fuom
Klf10	7.17024e-144	0.71144	0.815	0.227	1.35546e-139	Alveolar Macrophages	Klf10
2900097C17Rik	1.48728e-143	0.600964	0.851	0.247	2.81155e-139	Alveolar Macrophages	2900097C17Rik
Ctsa	1.80488e-143	1.20367	0.974	0.58	3.41195e-139	Alveolar Macrophages	Ctsa
Camk2d	2.85996e-143	0.956466	0.949	0.354	5.40648e-139	Alveolar Macrophages	Camk2d
Tubb6	6.11988e-143	0.433895	0.63	0.136	1.1569e-138	Alveolar Macrophages	Tubb6
Hspe1	1.20575e-142	0.86801	0.961	0.325	2.27934e-138	Alveolar Macrophages	Hspe1
Cmc2	1.46834e-142	0.342159	0.635	0.137	2.77576e-138	Alveolar Macrophages	Cmc2
Ywhab	1.64275e-142	1.11159	0.985	0.57	3.10546e-138	Alveolar Macrophages	Ywhab
Romo1	1.85994e-142	0.925119	0.959	0.382	3.51603e-138	Alveolar Macrophages	Romo1
Snx27	1.86172e-142	0.577197	0.805	0.222	3.5194e-138	Alveolar Macrophages	Snx27
Ctsb	2.4869e-142	1.21781	0.987	0.665	4.70124e-138	Alveolar Macrophages	Ctsb
Rcc2	2.6028e-142	0.403529	0.64	0.138	4.92033e-138	Alveolar Macrophages	Rcc2
Timm10	3.81867e-142	0.330197	0.478	0.085	7.21881e-138	Alveolar Macrophages	Timm10
Larp1	4.29599e-142	0.537034	0.758	0.195	8.12115e-138	Alveolar Macrophages	Larp1
Acly	1.12544e-141	0.610589	0.828	0.239	2.12753e-137	Alveolar Macrophages	Acly
Cox5a	1.19125e-141	1.11733	0.987	0.633	2.25194e-137	Alveolar Macrophages	Cox5a
Tmem109	1.54907e-141	0.386363	0.707	0.166	2.92837e-137	Alveolar Macrophages	Tmem109
Xpnpep1	1.77363e-141	0.322136	0.568	0.114	3.35286e-137	Alveolar Macrophages	Xpnpep1
Emp1	2.28167e-141	0.335335	0.632	0.133	4.31327e-137	Alveolar Macrophages	Emp1
Wdfy2	2.64392e-141	0.407566	0.607	0.132	4.99806e-137	Alveolar Macrophages	Wdfy2
Psmd1	3.20072e-141	0.485579	0.692	0.17	6.05064e-137	Alveolar Macrophages	Psmd1
Mrps25	3.86726e-141	0.45119	0.638	0.144	7.31066e-137	Alveolar Macrophages	Mrps25
Elovl5	3.98565e-141	0.301032	0.64	0.136	7.53448e-137	Alveolar Macrophages	Elovl5
Atf5	4.39964e-141	0.355027	0.355	0.05	8.31707e-137	Alveolar Macrophages	Atf5
Serpinb1a	4.64824e-141	0.558583	0.805	0.209	8.78702e-137	Alveolar Macrophages	Serpinb1a
Cc2d1b	4.81993e-141	0.283282	0.434	0.071	9.11159e-137	Alveolar Macrophages	Cc2d1b
Tmem87b	6.04199e-141	0.310211	0.54	0.103	1.14218e-136	Alveolar Macrophages	Tmem87b
Alox5	7.19399e-141	0.607179	0.799	0.212	1.35995e-136	Alveolar Macrophages	Alox5
Dlat	8.00783e-141	0.352175	0.55	0.109	1.5138e-136	Alveolar Macrophages	Dlat
Tbc1d5	8.87697e-141	0.368756	0.553	0.109	1.6781e-136	Alveolar Macrophages	Tbc1d5
Ndufa5	1.23505e-140	0.600843	0.887	0.265	2.33473e-136	Alveolar Macrophages	Ndufa5
Cfb	1.3026e-140	0.400582	0.404	0.063	2.46243e-136	Alveolar Macrophages	Cfb
Ggh	1.75471e-140	0.495455	0.753	0.194	3.3171e-136	Alveolar Macrophages	Ggh
Slc4a2	1.75742e-140	0.291393	0.476	0.083	3.32222e-136	Alveolar Macrophages	Slc4a2
Tspan31	1.83997e-140	0.421183	0.684	0.161	3.47828e-136	Alveolar Macrophages	Tspan31
Ddx39b	2.54374e-140	0.783212	0.928	0.321	4.80869e-136	Alveolar Macrophages	Ddx39b
Vps26a	5.05412e-140	0.653771	0.815	0.241	9.55432e-136	Alveolar Macrophages	Vps26a
Lamtor2	5.08545e-140	1.03409	0.979	0.553	9.61354e-136	Alveolar Macrophages	Lamtor2
Tars	7.53276e-140	0.271352	0.47	0.082	1.42399e-135	Alveolar Macrophages	Tars
Irak1	8.02727e-140	0.55794	0.825	0.228	1.51747e-135	Alveolar Macrophages	Irak1
Acadm	8.1147e-140	0.490191	0.735	0.187	1.534e-135	Alveolar Macrophages	Acadm
Lyz2	2.67423e-139	1.50475	1	0.717	5.05537e-135	Alveolar Macrophages	Lyz2
Ap5s1	4.05451e-139	0.28537	0.506	0.093	7.66465e-135	Alveolar Macrophages	Ap5s1
Naa20	5.07717e-139	0.429786	0.74	0.182	9.59788e-135	Alveolar Macrophages	Naa20
Sav1	6.02475e-139	0.41277	0.763	0.192	1.13892e-134	Alveolar Macrophages	Sav1
Msr1	9.42433e-139	0.355809	0.527	0.1	1.78158e-134	Alveolar Macrophages	Msr1
Ilf3	1.33895e-138	0.259586	0.432	0.07	2.53115e-134	Alveolar Macrophages	Ilf3
Ddx1	1.36272e-138	0.27865	0.506	0.093	2.57609e-134	Alveolar Macrophages	Ddx1
Abca1	1.47805e-138	0.725093	0.514	0.101	2.7941e-134	Alveolar Macrophages	Abca1
Irf8	1.52857e-138	0.290256	0.871	0.227	2.88961e-134	Alveolar Macrophages	Irf8
Tob1	1.5529e-138	0.744168	0.841	0.253	2.9356e-134	Alveolar Macrophages	Tob1
Vcp	1.81512e-138	0.923428	0.946	0.381	3.4313e-134	Alveolar Macrophages	Vcp
Atp5g3	1.97491e-138	1.0048	0.961	0.43	3.73336e-134	Alveolar Macrophages	Atp5g3
Il1rn	2.21454e-138	0.62482	0.774	0.202	4.18637e-134	Alveolar Macrophages	Il1rn
Chp1	2.79476e-138	0.992388	0.954	0.451	5.28321e-134	Alveolar Macrophages	Chp1
Sel1l	3.17955e-138	0.574489	0.792	0.219	6.01062e-134	Alveolar Macrophages	Sel1l
Actn1	4.12504e-138	0.88362	0.923	0.315	7.79797e-134	Alveolar Macrophages	Actn1
Coq5	4.44039e-138	0.368544	0.537	0.105	8.39412e-134	Alveolar Macrophages	Coq5
Insr	8.49453e-138	0.358065	0.604	0.129	1.60581e-133	Alveolar Macrophages	Insr
Pik3r6	1.0301e-137	0.360747	0.553	0.113	1.94731e-133	Alveolar Macrophages	Pik3r6
Emilin1	1.42704e-137	0.397443	0.53	0.105	2.69767e-133	Alveolar Macrophages	Emilin1
Bola3	2.02384e-137	0.370304	0.63	0.137	3.82586e-133	Alveolar Macrophages	Bola3
Ranbp1	2.55496e-137	0.700871	0.895	0.28	4.8299e-133	Alveolar Macrophages	Ranbp1
Snx12	4.14908e-137	0.296448	0.501	0.094	7.84343e-133	Alveolar Macrophages	Snx12
Calr	4.88689e-137	1.19358	0.977	0.479	9.23818e-133	Alveolar Macrophages	Calr
Irak2	4.94059e-137	0.357741	0.545	0.109	9.33969e-133	Alveolar Macrophages	Irak2
Gla	6.25555e-137	0.387791	0.524	0.103	1.18255e-132	Alveolar Macrophages	Gla
G3bp1	1.6702e-136	0.715301	0.913	0.291	3.15735e-132	Alveolar Macrophages	G3bp1
Otulinl	1.67153e-136	0.600551	0.884	0.244	3.15987e-132	Alveolar Macrophages	Otulinl
Tex261	2.96458e-136	0.532221	0.807	0.222	5.60423e-132	Alveolar Macrophages	Tex261
Tbcb	5.62349e-136	0.555913	0.823	0.246	1.06306e-131	Alveolar Macrophages	Tbcb
Impad1	8.09568e-136	0.414151	0.614	0.139	1.53041e-131	Alveolar Macrophages	Impad1
Isoc1	8.24601e-136	0.326993	0.571	0.116	1.55883e-131	Alveolar Macrophages	Isoc1
Eea1	8.994e-136	0.451413	0.728	0.179	1.70023e-131	Alveolar Macrophages	Eea1
Sla	1.66332e-135	0.888104	0.928	0.351	3.14435e-131	Alveolar Macrophages	Sla
Itm2c	5.78465e-135	0.68695	0.905	0.291	1.09353e-130	Alveolar Macrophages	Itm2c
Khsrp	5.97242e-135	0.437823	0.663	0.158	1.12903e-130	Alveolar Macrophages	Khsrp
Diaph2	7.23303e-135	0.600972	0.774	0.216	1.36733e-130	Alveolar Macrophages	Diaph2
Pigt	9.53244e-135	0.473416	0.807	0.219	1.80201e-130	Alveolar Macrophages	Pigt
Ddx21	1.1414e-134	0.502842	0.781	0.206	2.1577e-130	Alveolar Macrophages	Ddx21
Tagln2	1.23183e-134	1.24042	0.99	0.584	2.32865e-130	Alveolar Macrophages	Tagln2
Eif3a	1.85025e-134	0.980528	0.959	0.395	3.4977e-130	Alveolar Macrophages	Eif3a
Rock2	1.96996e-134	0.815944	0.902	0.32	3.724e-130	Alveolar Macrophages	Rock2
Dag1	4.35118e-134	0.262982	0.527	0.101	8.22548e-130	Alveolar Macrophages	Dag1
Gmfb	4.54204e-134	0.529209	0.73	0.196	8.58627e-130	Alveolar Macrophages	Gmfb
Mrpl3	4.64135e-134	0.340306	0.56	0.116	8.774e-130	Alveolar Macrophages	Mrpl3
Mycbp2	8.6243e-134	1.11108	0.961	0.44	1.63034e-129	Alveolar Macrophages	Mycbp2
Rnh1	2.78379e-133	1.1363	0.964	0.477	5.26248e-129	Alveolar Macrophages	Rnh1
Itprid2	3.2602e-133	0.378321	0.594	0.13	6.16309e-129	Alveolar Macrophages	Itprid2
Cct6a	4.89034e-133	0.623141	0.833	0.248	9.2447e-129	Alveolar Macrophages	Cct6a
Casp8	6.21039e-133	0.644584	0.833	0.256	1.17401e-128	Alveolar Macrophages	Casp8
Snapin	8.5545e-133	0.275581	0.494	0.093	1.61714e-128	Alveolar Macrophages	Snapin
Fbl	8.83939e-133	0.498508	0.756	0.195	1.671e-128	Alveolar Macrophages	Fbl
Capns1	8.86306e-133	0.938409	0.961	0.468	1.67547e-128	Alveolar Macrophages	Capns1
Hdgf	1.53397e-132	0.651338	0.887	0.271	2.89982e-128	Alveolar Macrophages	Hdgf
Map3k5	2.97345e-132	0.405027	0.645	0.15	5.62101e-128	Alveolar Macrophages	Map3k5
Mical1	6.20293e-132	0.474636	0.756	0.199	1.1726e-127	Alveolar Macrophages	Mical1
Bak1	6.31579e-132	0.515038	0.794	0.224	1.19394e-127	Alveolar Macrophages	Bak1
Tcp1	1.25613e-131	0.53875	0.853	0.243	2.37458e-127	Alveolar Macrophages	Tcp1
Mylip	1.26858e-131	0.435581	0.532	0.107	2.39813e-127	Alveolar Macrophages	Mylip
Spcs3	2.24467e-131	0.510777	0.681	0.171	4.24332e-127	Alveolar Macrophages	Spcs3
Clptm1l	3.25385e-131	0.613964	0.869	0.278	6.15108e-127	Alveolar Macrophages	Clptm1l
Mrpl11	4.72567e-131	0.374703	0.65	0.152	8.93341e-127	Alveolar Macrophages	Mrpl11
Ube2z	5.07194e-131	0.367119	0.653	0.153	9.588e-127	Alveolar Macrophages	Ube2z
Exoc5	5.10978e-131	0.499128	0.771	0.21	9.65952e-127	Alveolar Macrophages	Exoc5
Scamp2	1.55632e-130	0.756581	0.9	0.327	2.94207e-126	Alveolar Macrophages	Scamp2
Ilrun	1.78013e-130	0.511817	0.799	0.225	3.36516e-126	Alveolar Macrophages	Ilrun
Pla2g4a	1.90766e-130	0.310835	0.391	0.064	3.60624e-126	Alveolar Macrophages	Pla2g4a
Cebpg	1.93567e-130	0.62322	0.859	0.272	3.6592e-126	Alveolar Macrophages	Cebpg
Scpep1	2.517e-130	0.432476	0.558	0.119	4.75814e-126	Alveolar Macrophages	Scpep1
Klf4	3.17904e-130	0.640544	0.887	0.261	6.00965e-126	Alveolar Macrophages	Klf4
Dnm1l	4.45612e-130	0.330976	0.558	0.117	8.42384e-126	Alveolar Macrophages	Dnm1l
Pde7a	4.62436e-130	0.25325	0.486	0.089	8.74189e-126	Alveolar Macrophages	Pde7a
Dnmt1	4.85443e-130	0.342989	0.504	0.099	9.17682e-126	Alveolar Macrophages	Dnmt1
Mrps15	5.03736e-130	0.589995	0.797	0.225	9.52262e-126	Alveolar Macrophages	Mrps15
Cmc1	1.13777e-129	0.406279	0.674	0.163	2.15084e-125	Alveolar Macrophages	Cmc1
Hprt	1.17338e-129	0.738071	0.918	0.312	2.21817e-125	Alveolar Macrophages	Hprt
Stx3	1.22926e-129	0.339398	0.612	0.137	2.32379e-125	Alveolar Macrophages	Stx3
Trap1	2.95957e-129	0.260984	0.452	0.081	5.59477e-125	Alveolar Macrophages	Trap1
Pabpc1	3.09123e-129	1.12154	0.987	0.66	5.84367e-125	Alveolar Macrophages	Pabpc1
Mapkapk3	3.84865e-129	0.386008	0.545	0.116	7.27549e-125	Alveolar Macrophages	Mapkapk3
Golga4	4.25284e-129	0.414157	0.663	0.16	8.03957e-125	Alveolar Macrophages	Golga4
Gmppa	2.08201e-128	0.267145	0.409	0.069	3.93582e-124	Alveolar Macrophages	Gmppa
Tmbim6	2.43402e-128	0.902321	0.982	0.86	4.60127e-124	Alveolar Macrophages	Tmbim6
Reep4	3.57418e-128	0.323276	0.45	0.082	6.75664e-124	Alveolar Macrophages	Reep4
Lars	3.61403e-128	0.37812	0.602	0.137	6.83197e-124	Alveolar Macrophages	Lars
Gak	7.53117e-128	0.515811	0.733	0.202	1.42369e-123	Alveolar Macrophages	Gak
Myo9b	9.17028e-128	0.524968	0.843	0.251	1.73355e-123	Alveolar Macrophages	Myo9b
Hccs	1.04403e-127	0.295502	0.478	0.091	1.97364e-123	Alveolar Macrophages	Hccs
Apex1	1.05151e-127	0.252453	0.365	0.056	1.98778e-123	Alveolar Macrophages	Apex1
mt-Co3	1.06077e-127	1.0303	0.997	0.992	2.00527e-123	Alveolar Macrophages	mt-Co3
Vim	1.36362e-127	1.25921	0.997	0.85	2.57778e-123	Alveolar Macrophages	Vim
Gm44751	1.55996e-127	0.295647	0.357	0.055	2.94896e-123	Alveolar Macrophages	Gm44751
Cltc	2.13137e-127	0.901033	0.951	0.431	4.02914e-123	Alveolar Macrophages	Cltc
Stt3a	3.07806e-127	0.396482	0.733	0.188	5.81877e-123	Alveolar Macrophages	Stt3a
Snx1	3.50344e-127	0.8342	0.941	0.387	6.6229e-123	Alveolar Macrophages	Snx1
Rabep1	4.07312e-127	0.340138	0.617	0.139	7.69983e-123	Alveolar Macrophages	Rabep1
Ybx1	7.88022e-127	0.90993	0.992	0.731	1.48968e-122	Alveolar Macrophages	Ybx1
Atp2a2	8.36999e-127	0.44703	0.735	0.193	1.58226e-122	Alveolar Macrophages	Atp2a2
Arl8a	1.07664e-126	0.651881	0.871	0.288	2.03528e-122	Alveolar Macrophages	Arl8a
Vma21	1.17267e-126	0.425067	0.674	0.169	2.21682e-122	Alveolar Macrophages	Vma21
Ticam2	1.4876e-126	0.264078	0.352	0.054	2.81217e-122	Alveolar Macrophages	Ticam2
Dbndd2	1.72031e-126	0.272054	0.535	0.109	3.25207e-122	Alveolar Macrophages	Dbndd2
Alg1	1.77521e-126	0.274583	0.47	0.089	3.35586e-122	Alveolar Macrophages	Alg1
Pbdc1	1.91732e-126	0.380424	0.645	0.154	3.62451e-122	Alveolar Macrophages	Pbdc1
Spg7	2.2796e-126	0.340204	0.558	0.119	4.30936e-122	Alveolar Macrophages	Spg7
Mrpl23	3.91123e-126	0.501403	0.812	0.229	7.39378e-122	Alveolar Macrophages	Mrpl23
Slc35a4	4.3641e-126	0.308851	0.54	0.112	8.24989e-122	Alveolar Macrophages	Slc35a4
Eif4a1	9.16457e-126	1.04477	0.979	0.607	1.73247e-121	Alveolar Macrophages	Eif4a1
Ncor2	1.05216e-125	0.410103	0.643	0.156	1.989e-121	Alveolar Macrophages	Ncor2
Immt	1.47504e-125	0.47633	0.776	0.217	2.78842e-121	Alveolar Macrophages	Immt
Fam168b	1.50243e-125	0.563626	0.823	0.252	2.8402e-121	Alveolar Macrophages	Fam168b
Rplp1	1.6693e-125	1.08717	1	0.921	3.15565e-121	Alveolar Macrophages	Rplp1
Pum3	2.19144e-125	0.269789	0.509	0.102	4.14269e-121	Alveolar Macrophages	Pum3
Plk3	2.74484e-125	0.712702	0.823	0.259	5.18884e-121	Alveolar Macrophages	Plk3
Banf1	2.92896e-125	0.451255	0.843	0.236	5.53691e-121	Alveolar Macrophages	Banf1
Heatr5a	6.3399e-125	0.265379	0.424	0.075	1.19849e-120	Alveolar Macrophages	Heatr5a
Npepl1	2.38276e-124	0.257467	0.53	0.108	4.50438e-120	Alveolar Macrophages	Npepl1
Hadha	6.31271e-124	0.595846	0.838	0.271	1.19335e-119	Alveolar Macrophages	Hadha
Brox	9.2069e-124	0.328511	0.527	0.11	1.74047e-119	Alveolar Macrophages	Brox
Osgep	1.07512e-123	0.395644	0.694	0.172	2.03241e-119	Alveolar Macrophages	Osgep
Ech1	1.8261e-123	0.80978	0.946	0.404	3.45206e-119	Alveolar Macrophages	Ech1
Zswim8	1.83607e-123	0.324862	0.589	0.132	3.47091e-119	Alveolar Macrophages	Zswim8
Gnb1	2.00241e-123	0.942191	0.982	0.566	3.78535e-119	Alveolar Macrophages	Gnb1
Nol12	2.06543e-123	0.375776	0.632	0.151	3.90449e-119	Alveolar Macrophages	Nol12
Nek9	2.63592e-123	0.370511	0.658	0.161	4.98294e-119	Alveolar Macrophages	Nek9
Pex16	3.1866e-123	0.378567	0.584	0.133	6.02394e-119	Alveolar Macrophages	Pex16
B3gnt8	4.10359e-123	0.278446	0.391	0.065	7.75743e-119	Alveolar Macrophages	B3gnt8
Htt	7.44022e-123	0.275683	0.465	0.089	1.4065e-118	Alveolar Macrophages	Htt
Zfp385a	7.47327e-123	0.330605	0.452	0.087	1.41275e-118	Alveolar Macrophages	Zfp385a
Rxylt1	1.13831e-122	0.306024	0.591	0.132	2.15186e-118	Alveolar Macrophages	Rxylt1
Ide	1.28472e-122	0.261559	0.434	0.079	2.42864e-118	Alveolar Macrophages	Ide
Serhl	1.98138e-122	0.275771	0.388	0.065	3.7456e-118	Alveolar Macrophages	Serhl
Slc8a1	2.52419e-122	0.315481	0.473	0.093	4.77173e-118	Alveolar Macrophages	Slc8a1
Neu1	2.90814e-122	0.677024	0.923	0.329	5.49754e-118	Alveolar Macrophages	Neu1
Mrps36	3.74731e-122	0.392455	0.735	0.192	7.08392e-118	Alveolar Macrophages	Mrps36
BC029722	3.88393e-122	0.291863	0.506	0.104	7.34218e-118	Alveolar Macrophages	BC029722
Rap2b	3.90335e-122	0.489839	0.681	0.18	7.37889e-118	Alveolar Macrophages	Rap2b
Glmp	4.09791e-122	0.607777	0.877	0.296	7.74669e-118	Alveolar Macrophages	Glmp
Vps11	7.45069e-122	0.295137	0.476	0.094	1.40848e-117	Alveolar Macrophages	Vps11
Ctdnep1	7.55301e-122	0.497433	0.802	0.237	1.42782e-117	Alveolar Macrophages	Ctdnep1
Hsp90ab1	8.48275e-122	1.13602	0.987	0.609	1.60358e-117	Alveolar Macrophages	Hsp90ab1
Ap3m1	8.60158e-122	0.451193	0.689	0.182	1.62604e-117	Alveolar Macrophages	Ap3m1
Naa15	1.08685e-121	0.37102	0.635	0.151	2.05458e-117	Alveolar Macrophages	Naa15
Eif3l	1.68676e-121	0.49134	0.812	0.235	3.18865e-117	Alveolar Macrophages	Eif3l
Hcfc1r1	3.23355e-121	0.795152	0.925	0.388	6.1127e-117	Alveolar Macrophages	Hcfc1r1
Metap2	6.73758e-121	0.680727	0.918	0.332	1.27367e-116	Alveolar Macrophages	Metap2
Ctbp2	1.07193e-120	0.348024	0.607	0.143	2.02638e-116	Alveolar Macrophages	Ctbp2
Tyk2	1.11109e-120	0.324194	0.53	0.113	2.1004e-116	Alveolar Macrophages	Tyk2
Fam53b	1.21792e-120	0.35211	0.65	0.16	2.30235e-116	Alveolar Macrophages	Fam53b
Arhgef2	1.34077e-120	0.595233	0.859	0.284	2.53459e-116	Alveolar Macrophages	Arhgef2
Hmgn1	1.74133e-120	0.328787	0.789	0.205	3.29182e-116	Alveolar Macrophages	Hmgn1
Pip5k1c	1.84813e-120	0.500324	0.82	0.246	3.4937e-116	Alveolar Macrophages	Pip5k1c
Fpr2	2.65198e-120	1.01242	0.936	0.396	5.0133e-116	Alveolar Macrophages	Fpr2
Tomm70a	4.49701e-120	0.377356	0.607	0.143	8.50115e-116	Alveolar Macrophages	Tomm70a
Zmiz2	5.31462e-120	0.318363	0.627	0.146	1.00468e-115	Alveolar Macrophages	Zmiz2
Stip1	5.46431e-120	0.306893	0.638	0.152	1.03297e-115	Alveolar Macrophages	Stip1
Map4	6.59324e-120	0.38635	0.753	0.206	1.24639e-115	Alveolar Macrophages	Map4
Tgfb1	1.02308e-119	0.927093	0.974	0.454	1.93404e-115	Alveolar Macrophages	Tgfb1
Aim2	1.86362e-119	0.310409	0.519	0.11	3.52298e-115	Alveolar Macrophages	Aim2
Dhx9	2.20124e-119	0.411455	0.684	0.177	4.16122e-115	Alveolar Macrophages	Dhx9
Dstn	2.60368e-119	1.0152	0.985	0.606	4.92199e-115	Alveolar Macrophages	Dstn
Atp6ap2	2.90088e-119	0.866584	0.946	0.427	5.48382e-115	Alveolar Macrophages	Atp6ap2
Trnau1ap	3.67813e-119	0.364758	0.632	0.151	6.95313e-115	Alveolar Macrophages	Trnau1ap
Wdr83os	3.89572e-119	0.533073	0.82	0.257	7.36447e-115	Alveolar Macrophages	Wdr83os
P4hb	4.125e-119	0.707274	0.928	0.322	7.79791e-115	Alveolar Macrophages	P4hb
Pkib	4.66634e-119	0.388367	0.704	0.182	8.82125e-115	Alveolar Macrophages	Pkib
Tmem170b	5.13519e-119	0.377195	0.535	0.12	9.70757e-115	Alveolar Macrophages	Tmem170b
Pip4k2c	5.46247e-119	0.312059	0.571	0.127	1.03263e-114	Alveolar Macrophages	Pip4k2c
Usp22	6.04408e-119	0.389872	0.72	0.192	1.14257e-114	Alveolar Macrophages	Usp22
Calu	6.07797e-119	0.297529	0.643	0.156	1.14898e-114	Alveolar Macrophages	Calu
Trim25	7.50696e-119	0.795206	0.869	0.316	1.41912e-114	Alveolar Macrophages	Trim25
Hsph1	8.87001e-119	0.26314	0.406	0.072	1.67679e-114	Alveolar Macrophages	Hsph1
Aco2	1.18479e-118	0.471167	0.823	0.245	2.23974e-114	Alveolar Macrophages	Aco2
Tlr4	1.28876e-118	0.335369	0.63	0.151	2.43628e-114	Alveolar Macrophages	Tlr4
Ubqln2	1.45635e-118	0.311214	0.553	0.122	2.75309e-114	Alveolar Macrophages	Ubqln2
Ttc3	1.53142e-118	0.260583	0.442	0.081	2.89499e-114	Alveolar Macrophages	Ttc3
Ddx18	2.53182e-118	0.36387	0.668	0.168	4.78615e-114	Alveolar Macrophages	Ddx18
Lrrc8d	3.09701e-118	0.474224	0.769	0.222	5.85459e-114	Alveolar Macrophages	Lrrc8d
Flna	3.26494e-118	1.04323	0.969	0.61	6.17204e-114	Alveolar Macrophages	Flna
Opa1	5.12939e-118	0.28301	0.501	0.104	9.6966e-114	Alveolar Macrophages	Opa1
Sec31a	7.67719e-118	0.334239	0.653	0.163	1.4513e-113	Alveolar Macrophages	Sec31a
Cers5	8.55536e-118	0.41571	0.717	0.195	1.6173e-113	Alveolar Macrophages	Cers5
Cd47	1.02422e-117	0.852858	0.987	0.87	1.93618e-113	Alveolar Macrophages	Cd47
Usp48	1.62492e-117	0.340965	0.648	0.16	3.07175e-113	Alveolar Macrophages	Usp48
Arhgdia	2.03555e-117	0.90788	0.99	0.688	3.848e-113	Alveolar Macrophages	Arhgdia
Jpt1	2.58275e-117	0.882892	0.967	0.45	4.88242e-113	Alveolar Macrophages	Jpt1
Xbp1	2.95908e-117	0.849432	0.972	0.433	5.59384e-113	Alveolar Macrophages	Xbp1
Nsf	5.88411e-117	0.503046	0.776	0.227	1.11233e-112	Alveolar Macrophages	Nsf
Cast	6.28899e-117	0.760318	0.928	0.364	1.18887e-112	Alveolar Macrophages	Cast
Gngt2	1.22804e-116	0.863198	0.974	0.408	2.32148e-112	Alveolar Macrophages	Gngt2
Tmem33	1.26669e-116	0.52839	0.825	0.26	2.39455e-112	Alveolar Macrophages	Tmem33
Samm50	1.29831e-116	0.473553	0.743	0.214	2.45433e-112	Alveolar Macrophages	Samm50
Znrf2	1.4426e-116	0.470612	0.766	0.22	2.72708e-112	Alveolar Macrophages	Znrf2
Rbm7	1.78832e-116	0.794556	0.925	0.367	3.38064e-112	Alveolar Macrophages	Rbm7
Dnajc13	2.34073e-116	0.316921	0.604	0.144	4.42491e-112	Alveolar Macrophages	Dnajc13
Rab14	2.40754e-116	0.88304	0.99	0.651	4.55121e-112	Alveolar Macrophages	Rab14
Fkbp4	3.02808e-116	0.369384	0.725	0.192	5.72428e-112	Alveolar Macrophages	Fkbp4
Ncstn	3.4675e-116	0.463947	0.725	0.207	6.55496e-112	Alveolar Macrophages	Ncstn
Pacs2	3.59557e-116	0.281798	0.496	0.103	6.79706e-112	Alveolar Macrophages	Pacs2
Klc1	3.74703e-116	0.351941	0.643	0.161	7.08339e-112	Alveolar Macrophages	Klc1
Ecpas	4.65084e-116	0.354113	0.658	0.167	8.79196e-112	Alveolar Macrophages	Ecpas
Fosb	4.92426e-116	0.730508	0.668	0.184	9.30882e-112	Alveolar Macrophages	Fosb
Ywhah	5.27361e-116	0.916494	0.977	0.6	9.96924e-112	Alveolar Macrophages	Ywhah
Nedd9	7.12142e-116	0.780898	0.907	0.36	1.34623e-111	Alveolar Macrophages	Nedd9
Itgb2	8.51315e-116	1.01207	0.977	0.667	1.60933e-111	Alveolar Macrophages	Itgb2
Ola1	1.02946e-115	0.407852	0.712	0.191	1.9461e-111	Alveolar Macrophages	Ola1
Tufm	1.52966e-115	0.259907	0.44	0.085	2.89167e-111	Alveolar Macrophages	Tufm
Snrpb2	1.80953e-115	0.456438	0.758	0.214	3.42073e-111	Alveolar Macrophages	Snrpb2
Golt1b	2.16837e-115	0.262968	0.424	0.08	4.09909e-111	Alveolar Macrophages	Golt1b
Hspa4	2.19735e-115	0.598409	0.856	0.279	4.15387e-111	Alveolar Macrophages	Hspa4
Tmem216	2.31316e-115	0.254939	0.306	0.045	4.3728e-111	Alveolar Macrophages	Tmem216
Syngr2	2.94488e-115	0.65005	0.933	0.336	5.56701e-111	Alveolar Macrophages	Syngr2
Rex1bd	3.64285e-115	0.584826	0.884	0.299	6.88644e-111	Alveolar Macrophages	Rex1bd
Ccng1	4.26756e-115	0.398202	0.63	0.158	8.0674e-111	Alveolar Macrophages	Ccng1
Plekha2	5.64648e-115	0.365627	0.653	0.17	1.06741e-110	Alveolar Macrophages	Plekha2
Bmt2	1.77624e-114	0.374629	0.558	0.129	3.35781e-110	Alveolar Macrophages	Bmt2
Ash2l	1.82171e-114	0.273323	0.442	0.087	3.44376e-110	Alveolar Macrophages	Ash2l
Ap2b1	3.09767e-114	0.528667	0.846	0.277	5.85584e-110	Alveolar Macrophages	Ap2b1
Selenos	4.73254e-114	0.636686	0.915	0.319	8.9464e-110	Alveolar Macrophages	Selenos
Mdh1	5.40596e-114	0.57038	0.853	0.282	1.02194e-109	Alveolar Macrophages	Mdh1
Atp6v1a	5.45757e-114	0.820676	0.918	0.385	1.0317e-109	Alveolar Macrophages	Atp6v1a
Gspt1	6.87603e-114	0.437499	0.758	0.217	1.29984e-109	Alveolar Macrophages	Gspt1
Fkbp5	7.07531e-114	0.307445	0.458	0.092	1.33752e-109	Alveolar Macrophages	Fkbp5
Adam9	1.08334e-113	0.387257	0.581	0.143	2.04795e-109	Alveolar Macrophages	Adam9
Ncln	1.14485e-113	0.43312	0.707	0.197	2.16423e-109	Alveolar Macrophages	Ncln
Mrpl2	2.1082e-113	0.305734	0.609	0.148	3.98535e-109	Alveolar Macrophages	Mrpl2
Gtpbp4	3.31795e-113	0.356615	0.674	0.175	6.27225e-109	Alveolar Macrophages	Gtpbp4
Cct3	3.73048e-113	0.456223	0.802	0.234	7.05209e-109	Alveolar Macrophages	Cct3
Nsun2	4.14461e-113	0.270178	0.491	0.102	7.83498e-109	Alveolar Macrophages	Nsun2
Glud1	4.82352e-113	0.861416	0.972	0.463	9.11838e-109	Alveolar Macrophages	Glud1
Atp5g2	6.15377e-113	0.969417	0.979	0.489	1.16331e-108	Alveolar Macrophages	Atp5g2
Ndufab1	6.53784e-113	0.577953	0.913	0.321	1.23591e-108	Alveolar Macrophages	Ndufab1
Kpnb1	6.67835e-113	0.387959	0.671	0.177	1.26248e-108	Alveolar Macrophages	Kpnb1
Ssrp1	8.82917e-113	0.37381	0.666	0.174	1.66907e-108	Alveolar Macrophages	Ssrp1
Ddx46	1.0488e-112	0.681205	0.874	0.314	1.98265e-108	Alveolar Macrophages	Ddx46
Dnajc1	1.4933e-112	0.368735	0.674	0.176	2.82294e-108	Alveolar Macrophages	Dnajc1
Zfp451	2.25646e-112	0.291629	0.463	0.095	4.26562e-108	Alveolar Macrophages	Zfp451
Commd3	2.52462e-112	0.4245	0.81	0.243	4.77255e-108	Alveolar Macrophages	Commd3
Sord	3.14259e-112	0.280408	0.465	0.095	5.94076e-108	Alveolar Macrophages	Sord
Dpp9	3.48289e-112	0.266375	0.46	0.094	6.58406e-108	Alveolar Macrophages	Dpp9
Sqstm1	4.44397e-112	0.850768	0.933	0.393	8.40088e-108	Alveolar Macrophages	Sqstm1
2810004N23Rik	5.59824e-112	0.353104	0.591	0.145	1.05829e-107	Alveolar Macrophages	2810004N23Rik
Acaa1a	7.0895e-112	0.679884	0.884	0.31	1.3402e-107	Alveolar Macrophages	Acaa1a
Myh9	7.43311e-112	0.978345	0.972	0.688	1.40515e-107	Alveolar Macrophages	Myh9
Ahctf1	1.29303e-111	0.322309	0.527	0.118	2.44435e-107	Alveolar Macrophages	Ahctf1
Tgs1	2.00455e-111	0.33891	0.604	0.149	3.78941e-107	Alveolar Macrophages	Tgs1
Wls	2.09975e-111	0.321675	0.686	0.182	3.96936e-107	Alveolar Macrophages	Wls
Dcxr	2.39825e-111	0.265189	0.414	0.079	4.53365e-107	Alveolar Macrophages	Dcxr
Eif2a	2.63642e-111	0.299377	0.568	0.133	4.98388e-107	Alveolar Macrophages	Eif2a
Senp2	3.86779e-111	0.59198	0.848	0.288	7.31166e-107	Alveolar Macrophages	Senp2
Nop58	4.13109e-111	0.306706	0.491	0.104	7.80942e-107	Alveolar Macrophages	Nop58
Usp9x	1.70054e-110	0.490182	0.794	0.247	3.21469e-106	Alveolar Macrophages	Usp9x
Srebf1	2.31701e-110	0.279253	0.483	0.102	4.38008e-106	Alveolar Macrophages	Srebf1
Denr	3.47484e-110	0.424245	0.799	0.239	6.56883e-106	Alveolar Macrophages	Denr
Opa3	4.00596e-110	0.250643	0.404	0.076	7.57287e-106	Alveolar Macrophages	Opa3
Far1	4.04258e-110	0.527564	0.828	0.271	7.64209e-106	Alveolar Macrophages	Far1
Usp8	7.10908e-110	0.49644	0.805	0.252	1.3439e-105	Alveolar Macrophages	Usp8
Nudt9	7.29266e-110	0.267079	0.568	0.134	1.37861e-105	Alveolar Macrophages	Nudt9
Erap1	7.82393e-110	0.257855	0.514	0.113	1.47904e-105	Alveolar Macrophages	Erap1
Tubb5	8.96197e-110	0.821563	0.949	0.38	1.69417e-105	Alveolar Macrophages	Tubb5
Parp4	9.13776e-110	0.360599	0.63	0.164	1.7274e-105	Alveolar Macrophages	Parp4
Tor3a	9.81905e-110	0.297652	0.548	0.127	1.85619e-105	Alveolar Macrophages	Tor3a
Camta2	2.23044e-109	0.295964	0.571	0.137	4.21642e-105	Alveolar Macrophages	Camta2
Slc35c2	2.6645e-109	0.430248	0.717	0.207	5.03696e-105	Alveolar Macrophages	Slc35c2
Rbbp7	2.96134e-109	0.268297	0.622	0.151	5.59811e-105	Alveolar Macrophages	Rbbp7
Acot13	3.23861e-109	0.295029	0.548	0.126	6.12227e-105	Alveolar Macrophages	Acot13
Dynll2	3.35689e-109	0.257491	0.496	0.106	6.34586e-105	Alveolar Macrophages	Dynll2
mt-Cytb	6.98775e-109	1.0674	0.995	0.942	1.32096e-104	Alveolar Macrophages	mt-Cytb
Pigk	7.15041e-109	0.279685	0.53	0.122	1.35171e-104	Alveolar Macrophages	Pigk
Rab29	8.99857e-109	0.351518	0.512	0.117	1.70109e-104	Alveolar Macrophages	Rab29
2210016F16Rik	9.37938e-109	0.344594	0.625	0.16	1.77308e-104	Alveolar Macrophages	2210016F16Rik
Eif4g2	1.10659e-108	0.881271	0.979	0.606	2.09189e-104	Alveolar Macrophages	Eif4g2
Ubl4a	1.44435e-108	0.338317	0.576	0.142	2.73039e-104	Alveolar Macrophages	Ubl4a
Med15	1.49618e-108	0.378447	0.697	0.194	2.82838e-104	Alveolar Macrophages	Med15
Tor1b	1.83162e-108	0.263529	0.54	0.123	3.4625e-104	Alveolar Macrophages	Tor1b
Numa1	3.74882e-108	0.398334	0.766	0.223	7.08677e-104	Alveolar Macrophages	Numa1
Celf1	6.1102e-108	0.479402	0.794	0.246	1.15507e-103	Alveolar Macrophages	Celf1
Dhx15	8.53357e-108	0.492749	0.81	0.256	1.61319e-103	Alveolar Macrophages	Dhx15
St13	9.36435e-108	0.674602	0.92	0.355	1.77024e-103	Alveolar Macrophages	St13
Ubl3	9.83824e-108	0.824133	0.961	0.49	1.85982e-103	Alveolar Macrophages	Ubl3
Camk2g	2.51427e-107	0.360283	0.65	0.173	4.75298e-103	Alveolar Macrophages	Camk2g
Sipa1l3	2.54517e-107	0.31356	0.568	0.136	4.81139e-103	Alveolar Macrophages	Sipa1l3
Acat1	3.19363e-107	0.414409	0.648	0.171	6.03724e-103	Alveolar Macrophages	Acat1
Wdr1	5.43012e-107	0.846111	0.956	0.484	1.02651e-102	Alveolar Macrophages	Wdr1
Snd1	6.89194e-107	0.315105	0.535	0.125	1.30285e-102	Alveolar Macrophages	Snd1
H2-Ke6	7.12491e-107	0.282066	0.56	0.133	1.34689e-102	Alveolar Macrophages	H2-Ke6
Oxsr1	1.37326e-106	0.307174	0.53	0.124	2.596e-102	Alveolar Macrophages	Oxsr1
Pxmp4	1.45134e-106	0.289318	0.445	0.093	2.74361e-102	Alveolar Macrophages	Pxmp4
Tram1	1.78109e-106	0.621335	0.882	0.318	3.36697e-102	Alveolar Macrophages	Tram1
Glrx5	2.20797e-106	0.485207	0.817	0.255	4.17394e-102	Alveolar Macrophages	Glrx5
Tm2d1	2.50669e-106	0.432862	0.728	0.212	4.73865e-102	Alveolar Macrophages	Tm2d1
Prkaca	4.81068e-106	0.25993	0.504	0.113	9.09411e-102	Alveolar Macrophages	Prkaca
Rrp7a	5.75869e-106	0.322197	0.558	0.134	1.08862e-101	Alveolar Macrophages	Rrp7a
Selenop	7.18079e-106	0.580912	0.954	0.376	1.35746e-101	Alveolar Macrophages	Selenop
Trappc8	1.08707e-105	0.317275	0.622	0.159	2.055e-101	Alveolar Macrophages	Trappc8
Dr1	1.70723e-105	0.328663	0.607	0.154	3.22735e-101	Alveolar Macrophages	Dr1
Taok3	1.99647e-105	0.55546	0.861	0.296	3.77413e-101	Alveolar Macrophages	Taok3
Coa5	2.18602e-105	0.341327	0.663	0.18	4.13244e-101	Alveolar Macrophages	Coa5
Mob1a	2.23104e-105	0.790193	0.972	0.474	4.21756e-101	Alveolar Macrophages	Mob1a
Cs	2.43597e-105	0.512389	0.815	0.263	4.60496e-101	Alveolar Macrophages	Cs
Rnf166	2.47662e-105	0.459002	0.712	0.212	4.6818e-101	Alveolar Macrophages	Rnf166
Gls	2.8394e-105	0.613554	0.905	0.338	5.3676e-101	Alveolar Macrophages	Gls
Eef2	4.11583e-105	0.974783	0.992	0.662	7.78057e-101	Alveolar Macrophages	Eef2
Ap3d1	5.42175e-105	0.408676	0.751	0.222	1.02493e-100	Alveolar Macrophages	Ap3d1
Plekhm3	5.62215e-105	0.375558	0.71	0.199	1.06281e-100	Alveolar Macrophages	Plekhm3
Mbnl1	6.84252e-105	0.828822	0.974	0.456	1.29351e-100	Alveolar Macrophages	Mbnl1
Usf2	7.83982e-105	0.75636	0.956	0.452	1.48204e-100	Alveolar Macrophages	Usf2
Sppl2a	1.01605e-104	0.626124	0.941	0.369	1.92075e-100	Alveolar Macrophages	Sppl2a
Tob2	1.05486e-104	0.453158	0.766	0.228	1.99411e-100	Alveolar Macrophages	Tob2
Atpif1	1.53494e-104	0.816931	0.969	0.489	2.90166e-100	Alveolar Macrophages	Atpif1
Hmgcs1	2.19837e-104	0.504337	0.491	0.116	4.1558e-100	Alveolar Macrophages	Hmgcs1
Hadh	2.22662e-104	0.293307	0.514	0.118	4.20921e-100	Alveolar Macrophages	Hadh
Atad2	2.4378e-104	0.311733	0.509	0.115	4.60842e-100	Alveolar Macrophages	Atad2
Cd48	3.94952e-104	0.429651	0.787	0.23	7.46617e-100	Alveolar Macrophages	Cd48
Malt1	4.33637e-104	0.609889	0.781	0.252	8.19747e-100	Alveolar Macrophages	Malt1
Clta	6.12806e-104	0.835947	0.985	0.793	1.15845e-99	Alveolar Macrophages	Clta
mt-Co2	6.47162e-104	0.877869	0.99	0.991	1.2234e-99	Alveolar Macrophages	mt-Co2
Mgat1	6.9629e-104	0.435765	0.763	0.24	1.31627e-99	Alveolar Macrophages	Mgat1
Hint3	7.09157e-104	0.334929	0.586	0.151	1.34059e-99	Alveolar Macrophages	Hint3
Efr3a	9.94543e-104	0.365668	0.653	0.179	1.88008e-99	Alveolar Macrophages	Efr3a
Cand1	1.19077e-103	0.256833	0.463	0.099	2.25103e-99	Alveolar Macrophages	Cand1
Pdia3	1.23957e-103	0.835523	0.961	0.462	2.34328e-99	Alveolar Macrophages	Pdia3
Soat1	2.43935e-103	0.786462	0.941	0.423	4.61135e-99	Alveolar Macrophages	Soat1
Eif2s1	3.06035e-103	0.384814	0.774	0.228	5.78528e-99	Alveolar Macrophages	Eif2s1
Fam102b	3.10894e-103	0.319501	0.468	0.102	5.87714e-99	Alveolar Macrophages	Fam102b
Ube3a	3.68116e-103	0.544286	0.871	0.303	6.95887e-99	Alveolar Macrophages	Ube3a
Plaa	6.36262e-103	0.289882	0.512	0.118	1.20279e-98	Alveolar Macrophages	Plaa
Ube2q2	6.40329e-103	0.314038	0.483	0.11	1.21048e-98	Alveolar Macrophages	Ube2q2
Tmem189	9.31189e-103	0.645812	0.859	0.325	1.76032e-98	Alveolar Macrophages	Tmem189
Vdac2	1.12788e-102	0.824418	0.977	0.629	2.13214e-98	Alveolar Macrophages	Vdac2
Ahcyl1	1.35901e-102	0.280442	0.55	0.133	2.56907e-98	Alveolar Macrophages	Ahcyl1
Nudt5	1.37394e-102	0.254329	0.424	0.086	2.5973e-98	Alveolar Macrophages	Nudt5
Paics	1.79454e-102	0.289083	0.609	0.155	3.3924e-98	Alveolar Macrophages	Paics
Bola2	2.7027e-102	0.702376	0.923	0.352	5.10918e-98	Alveolar Macrophages	Bola2
Ghitm	5.48979e-102	0.630243	0.895	0.354	1.03779e-97	Alveolar Macrophages	Ghitm
Rps27l	5.6456e-102	0.848489	0.982	0.503	1.06724e-97	Alveolar Macrophages	Rps27l
Cox7c	5.81078e-102	0.899976	0.99	0.687	1.09847e-97	Alveolar Macrophages	Cox7c
Arcn1	5.87645e-102	0.575643	0.846	0.294	1.11088e-97	Alveolar Macrophages	Arcn1
Clcn4	6.26633e-102	0.346199	0.661	0.181	1.18459e-97	Alveolar Macrophages	Clcn4
BC005537	7.32636e-102	0.828932	0.954	0.481	1.38498e-97	Alveolar Macrophages	BC005537
Eftud2	7.55245e-102	0.270206	0.486	0.108	1.42772e-97	Alveolar Macrophages	Eftud2
Pdia6	1.08891e-101	0.648567	0.931	0.34	2.05848e-97	Alveolar Macrophages	Pdia6
Fbxo6	1.24372e-101	0.312768	0.512	0.121	2.35113e-97	Alveolar Macrophages	Fbxo6
Trappc2l	1.41794e-101	0.694165	0.918	0.389	2.68048e-97	Alveolar Macrophages	Trappc2l
mt-Nd2	1.57937e-101	1.0794	0.982	0.779	2.98565e-97	Alveolar Macrophages	mt-Nd2
Vac14	1.92383e-101	0.262968	0.416	0.085	3.63681e-97	Alveolar Macrophages	Vac14
Pcyt1a	2.53751e-101	0.36987	0.65	0.182	4.7969e-97	Alveolar Macrophages	Pcyt1a
Echs1	3.02709e-101	0.347014	0.653	0.176	5.72241e-97	Alveolar Macrophages	Echs1
Mrpl42	3.48445e-101	0.321538	0.645	0.174	6.58701e-97	Alveolar Macrophages	Mrpl42
Lypla2	4.036e-101	0.504289	0.781	0.258	7.62966e-97	Alveolar Macrophages	Lypla2
Ltv1	5.40702e-101	0.292009	0.478	0.108	1.02214e-96	Alveolar Macrophages	Ltv1
Hexb	5.81369e-101	0.46078	0.81	0.256	1.09902e-96	Alveolar Macrophages	Hexb
Nap1l1	6.32137e-101	0.769436	0.972	0.48	1.19499e-96	Alveolar Macrophages	Nap1l1
Atp5g1	7.55707e-101	0.7467	0.918	0.361	1.42859e-96	Alveolar Macrophages	Atp5g1
Gpx4	8.98608e-101	0.820776	0.99	0.77	1.69873e-96	Alveolar Macrophages	Gpx4
Csf2ra	1.20953e-100	0.816087	0.969	0.537	2.2865e-96	Alveolar Macrophages	Csf2ra
Rsl1d1	1.36167e-100	0.358633	0.645	0.176	2.57411e-96	Alveolar Macrophages	Rsl1d1
Cyb5a	2.00649e-100	0.589208	0.964	0.421	3.79307e-96	Alveolar Macrophages	Cyb5a
Gmnn	2.80626e-100	0.25642	0.409	0.083	5.30495e-96	Alveolar Macrophages	Gmnn
Atp1a1	4.28244e-100	0.577943	0.943	0.371	8.09552e-96	Alveolar Macrophages	Atp1a1
Ctsh	4.47424e-100	0.57501	0.936	0.345	8.45809e-96	Alveolar Macrophages	Ctsh
Sdf2l1	4.62423e-100	0.354198	0.596	0.155	8.74164e-96	Alveolar Macrophages	Sdf2l1
Tbl1x	4.75831e-100	0.271504	0.614	0.16	8.99511e-96	Alveolar Macrophages	Tbl1x
Mrpl13	4.98963e-100	0.261701	0.548	0.133	9.4324e-96	Alveolar Macrophages	Mrpl13
Fabp5	5.3189e-100	1.29544	0.789	0.292	1.00548e-95	Alveolar Macrophages	Fabp5
Cyb5b	5.72895e-100	0.271435	0.571	0.143	1.083e-95	Alveolar Macrophages	Cyb5b
Cox4i1	5.78134e-100	0.786545	0.995	0.879	1.0929e-95	Alveolar Macrophages	Cox4i1
Cpsf6	7.65285e-100	0.405375	0.72	0.216	1.44669e-95	Alveolar Macrophages	Cpsf6
Tmed3	1.02682e-99	0.407573	0.753	0.234	1.9411e-95	Alveolar Macrophages	Tmed3
Copg1	1.72476e-99	0.272824	0.542	0.132	3.26048e-95	Alveolar Macrophages	Copg1
Id2	2.80159e-99	0.890353	0.9	0.37	5.29612e-95	Alveolar Macrophages	Id2
Hnrnph1	3.70035e-99	0.470711	0.846	0.285	6.99514e-95	Alveolar Macrophages	Hnrnph1
Nampt	3.73652e-99	0.555027	0.789	0.263	7.06352e-95	Alveolar Macrophages	Nampt
Eif4g1	5.85741e-99	0.462809	0.835	0.279	1.10728e-94	Alveolar Macrophages	Eif4g1
Ybx3	6.16964e-99	0.332224	0.728	0.212	1.16631e-94	Alveolar Macrophages	Ybx3
mt-Atp6	7.70389e-99	0.936332	0.997	0.993	1.45634e-94	Alveolar Macrophages	mt-Atp6
Tomm34	7.71669e-99	0.31309	0.56	0.142	1.45876e-94	Alveolar Macrophages	Tomm34
Npm1	1.03e-98	0.900072	0.992	0.529	1.94712e-94	Alveolar Macrophages	Npm1
Vps35	2.69109e-98	0.617537	0.879	0.352	5.08724e-94	Alveolar Macrophages	Vps35
Peli2	3.40442e-98	0.277985	0.512	0.123	6.43571e-94	Alveolar Macrophages	Peli2
Ywhae	3.49896e-98	0.784468	0.977	0.592	6.61444e-94	Alveolar Macrophages	Ywhae
Pole4	4.65744e-98	0.25889	0.653	0.176	8.80442e-94	Alveolar Macrophages	Pole4
Mapk1	6.11811e-98	0.508218	0.861	0.311	1.15657e-93	Alveolar Macrophages	Mapk1
Slc25a24	7.56134e-98	0.373215	0.645	0.182	1.42939e-93	Alveolar Macrophages	Slc25a24
Bscl2	8.25075e-98	0.349224	0.625	0.171	1.55972e-93	Alveolar Macrophages	Bscl2
Btk	9.18969e-98	0.375682	0.72	0.216	1.73722e-93	Alveolar Macrophages	Btk
Ezr	1.15402e-97	0.79482	0.959	0.475	2.18157e-93	Alveolar Macrophages	Ezr
Rad23a	1.4221e-97	0.290558	0.614	0.164	2.68834e-93	Alveolar Macrophages	Rad23a
Ostm1	2.46508e-97	0.29609	0.612	0.164	4.65999e-93	Alveolar Macrophages	Ostm1
Vdac1	2.68397e-97	0.504283	0.784	0.27	5.07378e-93	Alveolar Macrophages	Vdac1
Emc7	2.72764e-97	0.557258	0.905	0.341	5.15634e-93	Alveolar Macrophages	Emc7
Ndufc1	2.99325e-97	0.570969	0.928	0.357	5.65845e-93	Alveolar Macrophages	Ndufc1
Cacybp	2.996e-97	0.543619	0.915	0.332	5.66364e-93	Alveolar Macrophages	Cacybp
Rreb1	3.15001e-97	0.330339	0.586	0.155	5.95479e-93	Alveolar Macrophages	Rreb1
Rab3d	3.62716e-97	0.388238	0.617	0.175	6.85678e-93	Alveolar Macrophages	Rab3d
Irs2	3.64523e-97	0.388632	0.589	0.156	6.89094e-93	Alveolar Macrophages	Irs2
Tomm20	3.66918e-97	0.766096	0.961	0.453	6.93621e-93	Alveolar Macrophages	Tomm20
Slc38a10	3.92248e-97	0.29783	0.668	0.189	7.41506e-93	Alveolar Macrophages	Slc38a10
Nfu1	4.05805e-97	0.287532	0.555	0.144	7.67135e-93	Alveolar Macrophages	Nfu1
Fndc3a	4.07139e-97	0.367242	0.717	0.212	7.69655e-93	Alveolar Macrophages	Fndc3a
Slc25a39	5.29757e-97	0.365723	0.65	0.188	1.00145e-92	Alveolar Macrophages	Slc25a39
Mapre2	5.29958e-97	0.341536	0.663	0.186	1.00183e-92	Alveolar Macrophages	Mapre2
Lcorl	6.26863e-97	0.262345	0.519	0.125	1.18502e-92	Alveolar Macrophages	Lcorl
Parl	7.30493e-97	0.402213	0.738	0.225	1.38092e-92	Alveolar Macrophages	Parl
Osbpl11	7.30895e-97	0.278406	0.486	0.114	1.38168e-92	Alveolar Macrophages	Osbpl11
Ormdl2	9.46863e-97	0.329646	0.602	0.164	1.78995e-92	Alveolar Macrophages	Ormdl2
Ptges3	9.98593e-97	0.652766	0.946	0.405	1.88774e-92	Alveolar Macrophages	Ptges3
Cap1	1.09661e-96	0.79634	0.982	0.778	2.07304e-92	Alveolar Macrophages	Cap1
Aqr	1.97026e-96	0.292386	0.612	0.164	3.72457e-92	Alveolar Macrophages	Aqr
Agtpbp1	2.01403e-96	0.298939	0.473	0.109	3.80733e-92	Alveolar Macrophages	Agtpbp1
Rmc1	2.14031e-96	0.271865	0.496	0.118	4.04605e-92	Alveolar Macrophages	Rmc1
Tardbp	2.18416e-96	0.498536	0.843	0.295	4.12893e-92	Alveolar Macrophages	Tardbp
Ndufs1	2.24511e-96	0.310696	0.589	0.159	4.24416e-92	Alveolar Macrophages	Ndufs1
Vps37a	2.57811e-96	0.311642	0.596	0.159	4.87366e-92	Alveolar Macrophages	Vps37a
Sars	3.50022e-96	0.480044	0.815	0.274	6.61681e-92	Alveolar Macrophages	Sars
Mrpl41	4.98499e-96	0.262771	0.627	0.17	9.42362e-92	Alveolar Macrophages	Mrpl41
Acadvl	7.73381e-96	0.341811	0.602	0.163	1.462e-91	Alveolar Macrophages	Acadvl
Ccdc115	1.81044e-95	0.317745	0.638	0.176	3.42246e-91	Alveolar Macrophages	Ccdc115
Eci2	2.37582e-95	0.424158	0.689	0.214	4.49126e-91	Alveolar Macrophages	Eci2
Sf3b3	3.59612e-95	0.318998	0.679	0.193	6.7981e-91	Alveolar Macrophages	Sf3b3
Zbtb7a	3.70435e-95	0.592633	0.907	0.357	7.00271e-91	Alveolar Macrophages	Zbtb7a
Zeb2	3.80416e-95	0.81655	0.956	0.43	7.19138e-91	Alveolar Macrophages	Zeb2
Serinc1	3.8587e-95	0.638551	0.925	0.402	7.29448e-91	Alveolar Macrophages	Serinc1
Pisd	5.26337e-95	0.297717	0.609	0.163	9.94987e-91	Alveolar Macrophages	Pisd
Mcm3	5.93298e-95	0.298152	0.272	0.042	1.12157e-90	Alveolar Macrophages	Mcm3
Nabp1	8.58834e-95	0.760672	0.853	0.348	1.62354e-90	Alveolar Macrophages	Nabp1
Nucks1	1.00352e-94	0.368648	0.802	0.253	1.89706e-90	Alveolar Macrophages	Nucks1
Tmem256	1.60569e-94	0.672849	0.964	0.4	3.0354e-90	Alveolar Macrophages	Tmem256
Zdhhc9	1.62597e-94	0.339926	0.658	0.19	3.07373e-90	Alveolar Macrophages	Zdhhc9
Cnpy2	1.65294e-94	0.352507	0.658	0.192	3.12472e-90	Alveolar Macrophages	Cnpy2
Dnajc19	1.66577e-94	0.395806	0.743	0.229	3.14897e-90	Alveolar Macrophages	Dnajc19
Sirt2	2.23555e-94	0.546701	0.869	0.331	4.22608e-90	Alveolar Macrophages	Sirt2
Fth1	3.22965e-94	0.976118	1	0.992	6.10533e-90	Alveolar Macrophages	Fth1
Kcnab2	3.96845e-94	0.272302	0.519	0.13	7.50196e-90	Alveolar Macrophages	Kcnab2
Nsfl1c	5.67859e-94	0.28339	0.638	0.177	1.07348e-89	Alveolar Macrophages	Nsfl1c
Atf6b	6.13106e-94	0.296567	0.645	0.181	1.15902e-89	Alveolar Macrophages	Atf6b
Ndufb6	7.62088e-94	0.506837	0.851	0.317	1.44065e-89	Alveolar Macrophages	Ndufb6
Mrpl17	7.95951e-94	0.444442	0.805	0.272	1.50467e-89	Alveolar Macrophages	Mrpl17
Cyfip1	1.46102e-93	0.508655	0.856	0.315	2.76192e-89	Alveolar Macrophages	Cyfip1
Plpbp	1.72941e-93	0.324608	0.596	0.164	3.26928e-89	Alveolar Macrophages	Plpbp
Sec61a1	2.0046e-93	0.355839	0.779	0.244	3.7895e-89	Alveolar Macrophages	Sec61a1
Stk10	2.29531e-93	0.612914	0.884	0.353	4.33905e-89	Alveolar Macrophages	Stk10
Stx4a	2.63362e-93	0.417591	0.756	0.247	4.97859e-89	Alveolar Macrophages	Stx4a
Fnbp1	2.99813e-93	0.564007	0.866	0.324	5.66767e-89	Alveolar Macrophages	Fnbp1
Nbeal1	3.82496e-93	0.262652	0.553	0.142	7.2307e-89	Alveolar Macrophages	Nbeal1
1810030O07Rik	4.45197e-93	0.308124	0.463	0.109	8.41601e-89	Alveolar Macrophages	1810030O07Rik
Rnf13	6.58537e-93	0.601345	0.91	0.389	1.2449e-88	Alveolar Macrophages	Rnf13
Ndufb2	6.89195e-93	0.524768	0.902	0.337	1.30285e-88	Alveolar Macrophages	Ndufb2
Esyt1	8.24897e-93	0.487187	0.794	0.272	1.55939e-88	Alveolar Macrophages	Esyt1
Psme4	9.79823e-93	0.30958	0.571	0.152	1.85226e-88	Alveolar Macrophages	Psme4
Arrdc4	1.03377e-92	0.390452	0.72	0.228	1.95425e-88	Alveolar Macrophages	Arrdc4
Gdi2	1.04584e-92	0.798477	0.987	0.588	1.97705e-88	Alveolar Macrophages	Gdi2
Actr2	1.35168e-92	0.787235	0.972	0.733	2.55521e-88	Alveolar Macrophages	Actr2
Dnajc2	1.41015e-92	0.352067	0.638	0.181	2.66575e-88	Alveolar Macrophages	Dnajc2
Hspa8	1.61291e-92	0.909377	0.997	0.813	3.04904e-88	Alveolar Macrophages	Hspa8
Tnks2	2.20322e-92	0.451184	0.812	0.28	4.16496e-88	Alveolar Macrophages	Tnks2
Srd5a3	2.2413e-92	0.34498	0.625	0.179	4.23696e-88	Alveolar Macrophages	Srd5a3
Gtf2h1	2.57109e-92	0.265269	0.483	0.115	4.86039e-88	Alveolar Macrophages	Gtf2h1
Uggt1	3.06596e-92	0.309361	0.635	0.179	5.7959e-88	Alveolar Macrophages	Uggt1
Uqcr11	3.20237e-92	0.742817	0.987	0.584	6.05376e-88	Alveolar Macrophages	Uqcr11
Xpo1	3.23059e-92	0.25184	0.589	0.156	6.10711e-88	Alveolar Macrophages	Xpo1
Trim28	3.6597e-92	0.255492	0.553	0.141	6.91831e-88	Alveolar Macrophages	Trim28
Fam172a	9.5846e-92	0.26639	0.54	0.138	1.81187e-87	Alveolar Macrophages	Fam172a
Sdha	1.09078e-91	0.541473	0.895	0.346	2.06201e-87	Alveolar Macrophages	Sdha
Arf3	1.11055e-91	0.538104	0.848	0.321	2.09939e-87	Alveolar Macrophages	Arf3
Hes6	1.30111e-91	0.274751	0.542	0.141	2.45962e-87	Alveolar Macrophages	Hes6
Vps54	1.61517e-91	0.297566	0.576	0.156	3.05331e-87	Alveolar Macrophages	Vps54
Ndufa10	2.93262e-91	0.423803	0.792	0.263	5.54383e-87	Alveolar Macrophages	Ndufa10
Faim	3.19011e-91	0.295979	0.576	0.152	6.03058e-87	Alveolar Macrophages	Faim
Lgals8	3.35434e-91	0.336632	0.681	0.206	6.34104e-87	Alveolar Macrophages	Lgals8
Npc2	4.33057e-91	0.721449	0.99	0.58	8.18651e-87	Alveolar Macrophages	Npc2
Tsg101	5.22703e-91	0.343834	0.684	0.208	9.88118e-87	Alveolar Macrophages	Tsg101
Ccl3	5.23579e-91	0.408653	0.458	0.113	9.89773e-87	Alveolar Macrophages	Ccl3
Ccny	6.22922e-91	0.36583	0.684	0.204	1.17757e-86	Alveolar Macrophages	Ccny
Trip12	7.50996e-91	0.447206	0.853	0.31	1.41968e-86	Alveolar Macrophages	Trip12
Nras	8.94139e-91	0.430784	0.789	0.276	1.69028e-86	Alveolar Macrophages	Nras
Mlf2	9.22073e-91	0.504121	0.879	0.337	1.74309e-86	Alveolar Macrophages	Mlf2
Cnot1	1.14937e-90	0.40697	0.766	0.247	2.17277e-86	Alveolar Macrophages	Cnot1
Rplp2	1.16594e-90	0.859716	0.997	0.898	2.2041e-86	Alveolar Macrophages	Rplp2
Ddrgk1	1.26387e-90	0.40015	0.851	0.292	2.38922e-86	Alveolar Macrophages	Ddrgk1
Mbd3	2.20334e-90	0.261568	0.653	0.184	4.16519e-86	Alveolar Macrophages	Mbd3
Slc25a4	2.23879e-90	0.339988	0.82	0.264	4.2322e-86	Alveolar Macrophages	Slc25a4
Mrpl28	2.61932e-90	0.333485	0.64	0.186	4.95157e-86	Alveolar Macrophages	Mrpl28
Lrrfip1	2.75621e-90	0.773844	0.959	0.534	5.21033e-86	Alveolar Macrophages	Lrrfip1
Tmx3	6.97983e-90	0.465678	0.794	0.283	1.31947e-85	Alveolar Macrophages	Tmx3
Mtx2	7.80202e-90	0.292464	0.512	0.129	1.47489e-85	Alveolar Macrophages	Mtx2
Plaur	1.74461e-89	0.897393	0.959	0.558	3.29802e-85	Alveolar Macrophages	Plaur
Lactb	2.57273e-89	0.327542	0.584	0.165	4.86349e-85	Alveolar Macrophages	Lactb
Adam10	3.78163e-89	0.5055	0.866	0.333	7.14879e-85	Alveolar Macrophages	Adam10
Gltp	5.29397e-89	0.607742	0.905	0.382	1.00077e-84	Alveolar Macrophages	Gltp
Atp6v0c	5.75051e-89	0.813484	0.99	0.829	1.08708e-84	Alveolar Macrophages	Atp6v0c
Nsmce2	6.12228e-89	0.264505	0.524	0.136	1.15736e-84	Alveolar Macrophages	Nsmce2
Glrx3	9.3555e-89	0.384752	0.74	0.235	1.76856e-84	Alveolar Macrophages	Glrx3
Hnrnpab	1.21717e-88	0.601774	0.925	0.386	2.30094e-84	Alveolar Macrophages	Hnrnpab
Dock8	1.27844e-88	0.584758	0.895	0.366	2.41676e-84	Alveolar Macrophages	Dock8
Magt1	1.32e-88	0.406716	0.733	0.231	2.49533e-84	Alveolar Macrophages	Magt1
Ddost	1.64251e-88	0.378119	0.799	0.259	3.105e-84	Alveolar Macrophages	Ddost
Tomm5	1.84887e-88	0.421351	0.848	0.295	3.4951e-84	Alveolar Macrophages	Tomm5
Ppp3cb	2.14663e-88	0.272329	0.555	0.149	4.05799e-84	Alveolar Macrophages	Ppp3cb
Slc8b1	2.25288e-88	0.292992	0.494	0.125	4.25884e-84	Alveolar Macrophages	Slc8b1
Rmnd5a	2.46315e-88	0.254063	0.612	0.17	4.65634e-84	Alveolar Macrophages	Rmnd5a
Csf2rb	2.85961e-88	0.826537	0.959	0.587	5.40582e-84	Alveolar Macrophages	Csf2rb
Cln3	3.19546e-88	0.407082	0.72	0.237	6.04071e-84	Alveolar Macrophages	Cln3
Actn4	3.4401e-88	0.477989	0.882	0.343	6.50316e-84	Alveolar Macrophages	Actn4
Prrc2a	4.67089e-88	0.443892	0.846	0.306	8.82984e-84	Alveolar Macrophages	Prrc2a
Uhrf2	5.6264e-88	0.307614	0.674	0.2	1.06361e-83	Alveolar Macrophages	Uhrf2
Ccdc88b	6.39129e-88	0.288888	0.622	0.179	1.20821e-83	Alveolar Macrophages	Ccdc88b
Acsl1	6.46754e-88	0.303866	0.658	0.197	1.22262e-83	Alveolar Macrophages	Acsl1
Idh3g	6.72563e-88	0.432139	0.787	0.271	1.27141e-83	Alveolar Macrophages	Idh3g
Itgb1	1.20943e-87	0.498332	0.954	0.396	2.28631e-83	Alveolar Macrophages	Itgb1
Ubr5	1.57733e-87	0.365548	0.746	0.244	2.98178e-83	Alveolar Macrophages	Ubr5
Pcbp2	3.15477e-87	0.764455	0.985	0.596	5.96378e-83	Alveolar Macrophages	Pcbp2
Actr1a	3.35025e-87	0.345919	0.71	0.225	6.33332e-83	Alveolar Macrophages	Actr1a
Hint1	3.87341e-87	0.831314	0.977	0.503	7.3223e-83	Alveolar Macrophages	Hint1
mt-Nd4l	3.99913e-87	0.681218	0.938	0.449	7.55995e-83	Alveolar Macrophages	mt-Nd4l
Cdv3	4.73101e-87	0.469255	0.848	0.309	8.94351e-83	Alveolar Macrophages	Cdv3
Kif1b	5.74576e-87	0.330905	0.753	0.245	1.08618e-82	Alveolar Macrophages	Kif1b
Csde1	1.1114e-86	0.714961	0.961	0.532	2.101e-82	Alveolar Macrophages	Csde1
Rnf4	1.24222e-86	0.327128	0.73	0.228	2.34829e-82	Alveolar Macrophages	Rnf4
Atp5a1	2.70201e-86	0.745267	0.974	0.549	5.10789e-82	Alveolar Macrophages	Atp5a1
Ipo7	4.19857e-86	0.279607	0.542	0.145	7.93697e-82	Alveolar Macrophages	Ipo7
Ssr3	4.78159e-86	0.483436	0.897	0.341	9.03912e-82	Alveolar Macrophages	Ssr3
Wsb2	4.84264e-86	0.311013	0.656	0.199	9.15453e-82	Alveolar Macrophages	Wsb2
Rp2	5.18863e-86	0.358406	0.674	0.21	9.80858e-82	Alveolar Macrophages	Rp2
Kidins220	6.18001e-86	0.25249	0.563	0.154	1.16827e-81	Alveolar Macrophages	Kidins220
Khdrbs1	6.20758e-86	0.520761	0.846	0.321	1.17348e-81	Alveolar Macrophages	Khdrbs1
Taok1	6.62907e-86	0.43462	0.848	0.313	1.25316e-81	Alveolar Macrophages	Taok1
Ell2	8.50595e-86	0.296882	0.504	0.129	1.60797e-81	Alveolar Macrophages	Ell2
Huwe1	9.21716e-86	0.343836	0.781	0.26	1.74241e-81	Alveolar Macrophages	Huwe1
Cenpx	1.10667e-85	0.475344	0.823	0.302	2.09205e-81	Alveolar Macrophages	Cenpx
Ncl	1.41352e-85	0.686719	0.959	0.488	2.67212e-81	Alveolar Macrophages	Ncl
Larp4	1.87666e-85	0.293284	0.62	0.181	3.54763e-81	Alveolar Macrophages	Larp4
Tcof1	2.13078e-85	0.261314	0.558	0.15	4.02803e-81	Alveolar Macrophages	Tcof1
Sdcbp	2.49491e-85	0.775328	0.979	0.756	4.71638e-81	Alveolar Macrophages	Sdcbp
Chd4	2.84911e-85	0.718906	0.949	0.494	5.38596e-81	Alveolar Macrophages	Chd4
Slmap	3.56338e-85	0.278305	0.566	0.158	6.73621e-81	Alveolar Macrophages	Slmap
mt-Atp8	3.90019e-85	0.555646	0.91	0.393	7.37292e-81	Alveolar Macrophages	mt-Atp8
Itfg1	8.10129e-85	0.277968	0.573	0.162	1.53147e-80	Alveolar Macrophages	Itfg1
Ndufa9	8.10147e-85	0.295237	0.617	0.181	1.5315e-80	Alveolar Macrophages	Ndufa9
Rad23b	1.17251e-84	0.310126	0.625	0.187	2.21652e-80	Alveolar Macrophages	Rad23b
Gtf3c2	1.55886e-84	0.267331	0.545	0.148	2.94687e-80	Alveolar Macrophages	Gtf3c2
Myo1g	1.95449e-84	0.295798	0.704	0.223	3.69476e-80	Alveolar Macrophages	Myo1g
Tusc1	2.71738e-84	0.304027	0.481	0.123	5.13694e-80	Alveolar Macrophages	Tusc1
Slc39a7	4.80693e-84	0.283201	0.702	0.216	9.08702e-80	Alveolar Macrophages	Slc39a7
Nudt3	5.18818e-84	0.256766	0.622	0.182	9.80774e-80	Alveolar Macrophages	Nudt3
Syne1	5.66575e-84	0.355256	0.704	0.217	1.07105e-79	Alveolar Macrophages	Syne1
Phb2	7.32311e-84	0.515742	0.871	0.336	1.38436e-79	Alveolar Macrophages	Phb2
Srsf6	8.05647e-84	0.485325	0.879	0.349	1.523e-79	Alveolar Macrophages	Srsf6
Pitpna	8.67496e-84	0.737522	0.972	0.632	1.63991e-79	Alveolar Macrophages	Pitpna
Ints6	9.35017e-84	0.275321	0.452	0.112	1.76756e-79	Alveolar Macrophages	Ints6
Cops2	9.50834e-84	0.250698	0.573	0.16	1.79746e-79	Alveolar Macrophages	Cops2
Pdpk1	1.16848e-83	0.320997	0.632	0.188	2.2089e-79	Alveolar Macrophages	Pdpk1
Chchd1	1.33075e-83	0.371589	0.792	0.266	2.51565e-79	Alveolar Macrophages	Chchd1
Fry	1.47468e-83	0.28997	0.584	0.168	2.78773e-79	Alveolar Macrophages	Fry
Tango2	1.8168e-83	0.266821	0.393	0.089	3.43449e-79	Alveolar Macrophages	Tango2
mt-Nd5	2.1515e-83	0.777086	0.964	0.618	4.06719e-79	Alveolar Macrophages	mt-Nd5
Arid1b	2.97246e-83	0.298158	0.594	0.172	5.61914e-79	Alveolar Macrophages	Arid1b
Tbc1d20	3.06776e-83	0.407543	0.792	0.282	5.79929e-79	Alveolar Macrophages	Tbc1d20
Bnip3l	3.19068e-83	0.700561	0.977	0.702	6.03165e-79	Alveolar Macrophages	Bnip3l
Pafah1b2	3.86089e-83	0.284439	0.617	0.185	7.29862e-79	Alveolar Macrophages	Pafah1b2
Nme2	5.36493e-83	0.829062	0.985	0.489	1.01419e-78	Alveolar Macrophages	Nme2
Tnpo3	6.39748e-83	0.296487	0.679	0.212	1.20938e-78	Alveolar Macrophages	Tnpo3
Supt16	6.63982e-83	0.381222	0.787	0.272	1.25519e-78	Alveolar Macrophages	Supt16
Pitpnm1	9.13083e-83	0.28187	0.573	0.164	1.72609e-78	Alveolar Macrophages	Pitpnm1
Rhoc	1.15509e-82	0.302012	0.663	0.203	2.18358e-78	Alveolar Macrophages	Rhoc
Ndufc2	1.18649e-82	0.397432	0.884	0.315	2.24293e-78	Alveolar Macrophages	Ndufc2
Chd8	1.19032e-82	0.309459	0.717	0.229	2.25017e-78	Alveolar Macrophages	Chd8
Ciao2a	1.67772e-82	0.673486	0.923	0.416	3.17156e-78	Alveolar Macrophages	Ciao2a
Zfp207	1.75539e-82	0.492441	0.856	0.339	3.31838e-78	Alveolar Macrophages	Zfp207
Itpr2	2.01314e-82	0.485673	0.792	0.295	3.80565e-78	Alveolar Macrophages	Itpr2
Atp6v1h	2.19131e-82	0.286733	0.609	0.181	4.14245e-78	Alveolar Macrophages	Atp6v1h
Sfpq	2.19864e-82	0.570844	0.913	0.383	4.15631e-78	Alveolar Macrophages	Sfpq
Nop10	3.07023e-82	0.443426	0.874	0.323	5.80397e-78	Alveolar Macrophages	Nop10
Arsb	3.16637e-82	0.310103	0.488	0.128	5.98571e-78	Alveolar Macrophages	Arsb
Tmem147	4.73957e-82	0.308441	0.699	0.214	8.95968e-78	Alveolar Macrophages	Tmem147
Ptbp1	7.56161e-82	0.29707	0.684	0.213	1.42945e-77	Alveolar Macrophages	Ptbp1
Vapb	7.8332e-82	0.371028	0.776	0.272	1.48079e-77	Alveolar Macrophages	Vapb
Ehbp1l1	1.10042e-81	0.505626	0.802	0.31	2.08023e-77	Alveolar Macrophages	Ehbp1l1
Tmem184b	1.17816e-81	0.299878	0.733	0.238	2.22719e-77	Alveolar Macrophages	Tmem184b
Vps13b	1.51006e-81	0.325061	0.499	0.133	2.85462e-77	Alveolar Macrophages	Vps13b
Polr2f	1.59545e-81	0.43286	0.871	0.328	3.01604e-77	Alveolar Macrophages	Polr2f
Xist	1.87037e-81	0.935781	0.918	0.622	3.53575e-77	Alveolar Macrophages	Xist
AI413582	2.0613e-81	0.333716	0.65	0.202	3.89669e-77	Alveolar Macrophages	AI413582
Wnk1	2.61923e-81	0.591394	0.936	0.441	4.95139e-77	Alveolar Macrophages	Wnk1
Sypl	2.89372e-81	0.43853	0.884	0.359	5.47029e-77	Alveolar Macrophages	Sypl
Emc10	4.94008e-81	0.403265	0.763	0.268	9.33872e-77	Alveolar Macrophages	Emc10
Acbd6	7.31988e-81	0.276285	0.658	0.206	1.38375e-76	Alveolar Macrophages	Acbd6
Rtn3	1.10528e-80	0.659434	0.961	0.56	2.08943e-76	Alveolar Macrophages	Rtn3
Man2a1	1.39929e-80	0.487413	0.861	0.346	2.64522e-76	Alveolar Macrophages	Man2a1
Morf4l2	2.47299e-80	0.377637	0.825	0.299	4.67494e-76	Alveolar Macrophages	Morf4l2
Prpf8	2.69368e-80	0.280108	0.722	0.234	5.09213e-76	Alveolar Macrophages	Prpf8
Abr	3.05386e-80	0.425151	0.851	0.33	5.77302e-76	Alveolar Macrophages	Abr
Gorasp2	3.14667e-80	0.266027	0.599	0.176	5.94846e-76	Alveolar Macrophages	Gorasp2
Ssr1	3.14971e-80	0.378384	0.781	0.269	5.95421e-76	Alveolar Macrophages	Ssr1
Tmem160	3.3489e-80	0.52033	0.897	0.361	6.33076e-76	Alveolar Macrophages	Tmem160
Cmpk1	4.04264e-80	0.627236	0.918	0.435	7.64221e-76	Alveolar Macrophages	Cmpk1
Ctnnb1	4.19049e-80	0.740142	0.972	0.656	7.92169e-76	Alveolar Macrophages	Ctnnb1
Cox6a1	4.50265e-80	0.66475	0.977	0.627	8.51181e-76	Alveolar Macrophages	Cox6a1
Copa	4.62892e-80	0.452806	0.797	0.292	8.75051e-76	Alveolar Macrophages	Copa
Cfdp1	5.65256e-80	0.266005	0.725	0.235	1.06856e-75	Alveolar Macrophages	Cfdp1
As3mt	6.53282e-80	0.25032	0.555	0.156	1.23496e-75	Alveolar Macrophages	As3mt
Smarcb1	6.81059e-80	0.261453	0.506	0.137	1.28747e-75	Alveolar Macrophages	Smarcb1
Tmed10	6.85119e-80	0.668765	0.979	0.621	1.29515e-75	Alveolar Macrophages	Tmed10
Psmb6	7.62383e-80	0.640286	0.925	0.437	1.44121e-75	Alveolar Macrophages	Psmb6
Atp6v0a1	1.02439e-79	0.385523	0.833	0.304	1.93651e-75	Alveolar Macrophages	Atp6v0a1
Mcts1	1.27463e-79	0.405994	0.704	0.242	2.40956e-75	Alveolar Macrophages	Mcts1
Timm13	1.36245e-79	0.566597	0.925	0.399	2.57558e-75	Alveolar Macrophages	Timm13
Desi2	1.54834e-79	0.298285	0.604	0.179	2.92699e-75	Alveolar Macrophages	Desi2
Plek	1.72084e-79	0.806242	0.972	0.627	3.25308e-75	Alveolar Macrophages	Plek
Rrbp1	2.57616e-79	0.735412	0.967	0.545	4.86997e-75	Alveolar Macrophages	Rrbp1
Atg7	4.40638e-79	0.363665	0.686	0.228	8.32983e-75	Alveolar Macrophages	Atg7
P2rx4	4.57406e-79	0.266981	0.604	0.18	8.6468e-75	Alveolar Macrophages	P2rx4
Uso1	5.88932e-79	0.270819	0.566	0.162	1.11332e-74	Alveolar Macrophages	Uso1
AI662270	6.09364e-79	0.326373	0.717	0.232	1.15194e-74	Alveolar Macrophages	AI662270
Acbd5	6.8596e-79	0.378585	0.763	0.272	1.29674e-74	Alveolar Macrophages	Acbd5
Ptpa	7.19496e-79	0.255983	0.622	0.187	1.36013e-74	Alveolar Macrophages	Ptpa
Anapc11	1.14048e-78	0.343076	0.769	0.269	2.15596e-74	Alveolar Macrophages	Anapc11
Dtymk	1.81422e-78	0.288343	0.455	0.117	3.42961e-74	Alveolar Macrophages	Dtymk
Nipa2	2.19239e-78	0.402649	0.797	0.289	4.14449e-74	Alveolar Macrophages	Nipa2
Tspan14	2.47235e-78	0.384917	0.74	0.262	4.67374e-74	Alveolar Macrophages	Tspan14
Fubp1	2.90734e-78	0.286524	0.758	0.253	5.49603e-74	Alveolar Macrophages	Fubp1
Tmem259	3.35757e-78	0.305813	0.668	0.215	6.34716e-74	Alveolar Macrophages	Tmem259
Anxa2	4.0702e-78	0.770732	0.997	0.797	7.6943e-74	Alveolar Macrophages	Anxa2
Rap1gds1	5.66063e-78	0.262466	0.656	0.206	1.07009e-73	Alveolar Macrophages	Rap1gds1
Usp2	7.1482e-78	0.274779	0.278	0.051	1.3513e-73	Alveolar Macrophages	Usp2
Hnrnpa0	1.00657e-77	0.544884	0.931	0.419	1.90281e-73	Alveolar Macrophages	Hnrnpa0
Rps17	1.01909e-77	0.786515	0.99	0.668	1.92648e-73	Alveolar Macrophages	Rps17
Scp2	1.02529e-77	0.685599	0.982	0.622	1.9382e-73	Alveolar Macrophages	Scp2
Insig1	1.12853e-77	0.375021	0.452	0.122	2.13338e-73	Alveolar Macrophages	Insig1
Ndufs3	1.23859e-77	0.32896	0.758	0.254	2.34142e-73	Alveolar Macrophages	Ndufs3
Slpi	1.45273e-77	1.22363	0.954	0.607	2.74624e-73	Alveolar Macrophages	Slpi
Supt5	1.48991e-77	0.301246	0.763	0.259	2.81653e-73	Alveolar Macrophages	Supt5
1110038B12Rik	1.80465e-77	0.257147	0.442	0.112	3.41151e-73	Alveolar Macrophages	1110038B12Rik
Atp6ap1	2.15121e-77	0.603773	0.936	0.458	4.06664e-73	Alveolar Macrophages	Atp6ap1
Sppl3	2.62511e-77	0.261378	0.686	0.221	4.96252e-73	Alveolar Macrophages	Sppl3
Psmd14	2.75708e-77	0.309348	0.689	0.229	5.21199e-73	Alveolar Macrophages	Psmd14
Myo5a	2.9361e-77	0.352189	0.483	0.137	5.55041e-73	Alveolar Macrophages	Myo5a
Setd1b	4.10323e-77	0.282997	0.609	0.187	7.75674e-73	Alveolar Macrophages	Setd1b
Dram2	6.73019e-77	0.352979	0.73	0.257	1.27227e-72	Alveolar Macrophages	Dram2
Lrrfip2	7.39153e-77	0.384673	0.792	0.288	1.39729e-72	Alveolar Macrophages	Lrrfip2
Atp6v0d1	1.60929e-76	0.661802	0.964	0.55	3.04221e-72	Alveolar Macrophages	Atp6v0d1
Npepps	1.61926e-76	0.410242	0.766	0.282	3.06105e-72	Alveolar Macrophages	Npepps
Uqcrb	1.87066e-76	0.579748	0.941	0.454	3.5363e-72	Alveolar Macrophages	Uqcrb
Tmem154	2.18586e-76	0.438873	0.848	0.324	4.13215e-72	Alveolar Macrophages	Tmem154
Atp5b	2.26218e-76	0.682911	0.979	0.666	4.27642e-72	Alveolar Macrophages	Atp5b
BC004004	4.7074e-76	0.290638	0.656	0.211	8.89887e-72	Alveolar Macrophages	BC004004
Dld	7.83327e-76	0.320156	0.627	0.2	1.4808e-71	Alveolar Macrophages	Dld
Anp32b	1.19792e-75	0.676759	0.956	0.5	2.26456e-71	Alveolar Macrophages	Anp32b
Fuca2	1.80019e-75	0.315188	0.766	0.271	3.40308e-71	Alveolar Macrophages	Fuca2
Ap2a2	1.88725e-75	0.378138	0.828	0.302	3.56765e-71	Alveolar Macrophages	Ap2a2
Emp3	2.14515e-75	0.506863	0.954	0.408	4.05519e-71	Alveolar Macrophages	Emp3
Coro2a	2.23373e-75	0.293836	0.522	0.152	4.22265e-71	Alveolar Macrophages	Coro2a
Ap2m1	2.35596e-75	0.485414	0.897	0.394	4.45371e-71	Alveolar Macrophages	Ap2m1
Exosc5	2.36609e-75	0.293944	0.717	0.235	4.47285e-71	Alveolar Macrophages	Exosc5
Trmt112	2.65771e-75	0.491551	0.882	0.354	5.02413e-71	Alveolar Macrophages	Trmt112
Nucb1	2.6707e-75	0.298137	0.774	0.27	5.04869e-71	Alveolar Macrophages	Nucb1
2510039O18Rik	2.72148e-75	0.285912	0.702	0.234	5.14468e-71	Alveolar Macrophages	2510039O18Rik
Eif3c	5.06322e-75	0.604847	0.946	0.464	9.57151e-71	Alveolar Macrophages	Eif3c
Cct8	8.57977e-75	0.484244	0.897	0.361	1.62192e-70	Alveolar Macrophages	Cct8
Gadd45g	8.64788e-75	0.321575	0.604	0.188	1.63479e-70	Alveolar Macrophages	Gadd45g
Hmox2	1.01425e-74	0.477424	0.871	0.362	1.91733e-70	Alveolar Macrophages	Hmox2
Eif5a	1.57149e-74	0.673579	0.985	0.783	2.97075e-70	Alveolar Macrophages	Eif5a
Pbrm1	2.76357e-74	0.443127	0.866	0.339	5.22425e-70	Alveolar Macrophages	Pbrm1
H2afz	3.0724e-74	0.648596	0.99	0.804	5.80807e-70	Alveolar Macrophages	H2afz
Tmed7	3.82868e-74	0.377889	0.838	0.321	7.23774e-70	Alveolar Macrophages	Tmed7
Rnpepl1	4.90446e-74	0.325172	0.707	0.244	9.2714e-70	Alveolar Macrophages	Rnpepl1
Ube2e1	6.5603e-74	0.310939	0.717	0.243	1.24016e-69	Alveolar Macrophages	Ube2e1
Cul5	1.38114e-73	0.256988	0.447	0.118	2.6109e-69	Alveolar Macrophages	Cul5
Ifrd1	1.66088e-73	0.487904	0.797	0.312	3.13974e-69	Alveolar Macrophages	Ifrd1
Emc6	1.84557e-73	0.374468	0.817	0.307	3.48886e-69	Alveolar Macrophages	Emc6
Kdm5c	2.23691e-73	0.255326	0.625	0.197	4.22866e-69	Alveolar Macrophages	Kdm5c
Acsl5	2.72749e-73	0.342059	0.743	0.264	5.15605e-69	Alveolar Macrophages	Acsl5
Cct4	2.82846e-73	0.474547	0.907	0.367	5.34692e-69	Alveolar Macrophages	Cct4
Ubald1	3.3885e-73	0.263519	0.65	0.209	6.40563e-69	Alveolar Macrophages	Ubald1
Sumo3	3.86976e-73	0.284623	0.681	0.228	7.31539e-69	Alveolar Macrophages	Sumo3
Chtop	4.07548e-73	0.257278	0.679	0.223	7.7043e-69	Alveolar Macrophages	Chtop
Cct5	8.95583e-73	0.445629	0.897	0.357	1.69301e-68	Alveolar Macrophages	Cct5
Ddx17	9.74662e-73	0.470487	0.889	0.384	1.8425e-68	Alveolar Macrophages	Ddx17
Lars2	1.02309e-72	0.632456	0.99	0.918	1.93405e-68	Alveolar Macrophages	Lars2
Ankrd17	1.02717e-72	0.277347	0.653	0.213	1.94176e-68	Alveolar Macrophages	Ankrd17
2610001J05Rik	1.10417e-72	0.336335	0.728	0.256	2.08732e-68	Alveolar Macrophages	2610001J05Rik
Cox6b1	1.1111e-72	0.623712	0.987	0.831	2.10043e-68	Alveolar Macrophages	Cox6b1
Atp6v1f	1.54308e-72	0.642917	0.985	0.778	2.91703e-68	Alveolar Macrophages	Atp6v1f
Arhgef6	1.61785e-72	0.289659	0.64	0.208	3.05839e-68	Alveolar Macrophages	Arhgef6
Nek7	1.62395e-72	0.276254	0.748	0.257	3.06992e-68	Alveolar Macrophages	Nek7
Hnrnpul1	2.17814e-72	0.44702	0.884	0.372	4.11756e-68	Alveolar Macrophages	Hnrnpul1
Unc119	3.2203e-72	0.646488	0.954	0.494	6.08766e-68	Alveolar Macrophages	Unc119
Mrps33	3.29061e-72	0.467294	0.907	0.389	6.22056e-68	Alveolar Macrophages	Mrps33
Tmco1	3.60418e-72	0.39154	0.871	0.354	6.81334e-68	Alveolar Macrophages	Tmco1
Ipmk	5.02334e-72	0.298453	0.666	0.22	9.49612e-68	Alveolar Macrophages	Ipmk
Zc3h18	6.47632e-72	0.258917	0.568	0.171	1.22428e-67	Alveolar Macrophages	Zc3h18
Fam89b	6.89586e-72	0.448974	0.861	0.353	1.30359e-67	Alveolar Macrophages	Fam89b
Ndufa4	8.34705e-72	0.655376	0.982	0.61	1.57793e-67	Alveolar Macrophages	Ndufa4
Ddi2	8.45929e-72	0.461528	0.846	0.353	1.59914e-67	Alveolar Macrophages	Ddi2
Capn1	9.65026e-72	0.556319	0.895	0.411	1.82429e-67	Alveolar Macrophages	Capn1
Cyth1	1.91075e-71	0.257146	0.65	0.212	3.61208e-67	Alveolar Macrophages	Cyth1
Mtdh	2.42e-71	0.596456	0.943	0.503	4.57477e-67	Alveolar Macrophages	Mtdh
Arl6ip1	2.58506e-71	0.6551	0.974	0.62	4.88679e-67	Alveolar Macrophages	Arl6ip1
Dlst	3.72374e-71	0.335861	0.751	0.271	7.03936e-67	Alveolar Macrophages	Dlst
Smarca5	4.5493e-71	0.467471	0.915	0.398	8.60001e-67	Alveolar Macrophages	Smarca5
Edem1	5.0894e-71	0.413369	0.784	0.3	9.62099e-67	Alveolar Macrophages	Edem1
U2af2	8.07176e-71	0.284887	0.74	0.262	1.52589e-66	Alveolar Macrophages	U2af2
Hdlbp	8.48188e-71	0.421179	0.838	0.327	1.60341e-66	Alveolar Macrophages	Hdlbp
Cct2	1.02444e-70	0.437813	0.9	0.368	1.9366e-66	Alveolar Macrophages	Cct2
Sptssa	1.20021e-70	0.27404	0.779	0.272	2.26888e-66	Alveolar Macrophages	Sptssa
Tlk1	1.62622e-70	0.256112	0.65	0.215	3.07421e-66	Alveolar Macrophages	Tlk1
Ube2v1	1.85529e-70	0.355245	0.81	0.305	3.50724e-66	Alveolar Macrophages	Ube2v1
Xpr1	2.06601e-70	0.346022	0.823	0.316	3.90559e-66	Alveolar Macrophages	Xpr1
Tmem123	2.27713e-70	0.26406	0.702	0.241	4.30469e-66	Alveolar Macrophages	Tmem123
Ptk2b	2.86836e-70	0.418223	0.853	0.344	5.42236e-66	Alveolar Macrophages	Ptk2b
Nudcd3	3.127e-70	0.322172	0.769	0.282	5.91127e-66	Alveolar Macrophages	Nudcd3
Herc2	3.60689e-70	0.256932	0.54	0.162	6.81846e-66	Alveolar Macrophages	Herc2
Hpf1	3.67489e-70	0.271033	0.594	0.188	6.947e-66	Alveolar Macrophages	Hpf1
Ube2q1	3.73639e-70	0.403529	0.828	0.329	7.06328e-66	Alveolar Macrophages	Ube2q1
Mrps17	3.86075e-70	0.280819	0.638	0.211	7.29836e-66	Alveolar Macrophages	Mrps17
Ncoa1	6.71107e-70	0.36668	0.676	0.235	1.26866e-65	Alveolar Macrophages	Ncoa1
Hnrnpl	7.85731e-70	0.379856	0.825	0.327	1.48535e-65	Alveolar Macrophages	Hnrnpl
Slc25a5	8.95159e-70	0.701994	0.967	0.69	1.69221e-65	Alveolar Macrophages	Slc25a5
Prpf40a	1.17567e-69	0.483568	0.869	0.366	2.22248e-65	Alveolar Macrophages	Prpf40a
Skil	4.37124e-69	0.47744	0.799	0.333	8.2634e-65	Alveolar Macrophages	Skil
Tomm6	6.58008e-69	0.647954	0.979	0.697	1.2439e-64	Alveolar Macrophages	Tomm6
Mia3	7.68684e-69	0.390071	0.807	0.319	1.45312e-64	Alveolar Macrophages	Mia3
Atg5	9.05992e-69	0.339211	0.746	0.273	1.71269e-64	Alveolar Macrophages	Atg5
Atp6v0e	1.54374e-68	0.569804	0.987	0.831	2.91828e-64	Alveolar Macrophages	Atp6v0e
Rpl23a	1.69203e-68	0.696712	0.982	0.733	3.19861e-64	Alveolar Macrophages	Rpl23a
Zmiz1	2.57855e-68	0.420938	0.882	0.378	4.87449e-64	Alveolar Macrophages	Zmiz1
Psma6	2.60175e-68	0.502935	0.884	0.41	4.91834e-64	Alveolar Macrophages	Psma6
Api5	2.77131e-68	0.369248	0.841	0.327	5.23889e-64	Alveolar Macrophages	Api5
Ppp6r1	3.97055e-68	0.381037	0.846	0.341	7.50594e-64	Alveolar Macrophages	Ppp6r1
Adam17	4.59997e-68	0.460672	0.897	0.401	8.69578e-64	Alveolar Macrophages	Adam17
Safb2	7.08455e-68	0.315742	0.761	0.283	1.33926e-63	Alveolar Macrophages	Safb2
9530068E07Rik	7.72832e-68	0.370658	0.828	0.338	1.46096e-63	Alveolar Macrophages	9530068E07Rik
Ccni	1.03716e-67	0.476735	0.907	0.416	1.96064e-63	Alveolar Macrophages	Ccni
Nmt1	1.14085e-67	0.505771	0.91	0.418	2.15667e-63	Alveolar Macrophages	Nmt1
Psmc3	1.32879e-67	0.305827	0.774	0.29	2.51194e-63	Alveolar Macrophages	Psmc3
Pgls	1.44186e-67	0.578052	0.951	0.515	2.72569e-63	Alveolar Macrophages	Pgls
Lsm4	1.83747e-67	0.321985	0.774	0.282	3.47356e-63	Alveolar Macrophages	Lsm4
Uqcc2	1.96211e-67	0.282523	0.766	0.274	3.70917e-63	Alveolar Macrophages	Uqcc2
Mpp1	2.69528e-67	0.587698	0.918	0.477	5.09515e-63	Alveolar Macrophages	Mpp1
Ddx3x	3.0814e-67	0.566256	0.964	0.555	5.82509e-63	Alveolar Macrophages	Ddx3x
Ndufa12	3.42743e-67	0.335873	0.812	0.325	6.47921e-63	Alveolar Macrophages	Ndufa12
Mpc2	3.55293e-67	0.616557	0.951	0.523	6.71645e-63	Alveolar Macrophages	Mpc2
Ran	3.69588e-67	0.500036	0.928	0.419	6.98668e-63	Alveolar Macrophages	Ran
Laptm4a	4.69285e-67	0.522184	0.974	0.6	8.87136e-63	Alveolar Macrophages	Laptm4a
Mydgf	5.14635e-67	0.280919	0.717	0.25	9.72866e-63	Alveolar Macrophages	Mydgf
Reep3	5.81318e-67	0.539808	0.91	0.455	1.09892e-62	Alveolar Macrophages	Reep3
Foxn3	9.04864e-67	0.3391	0.735	0.269	1.71056e-62	Alveolar Macrophages	Foxn3
Cotl1	1.45401e-66	0.802676	0.995	0.762	2.74865e-62	Alveolar Macrophages	Cotl1
Sf1	2.28543e-66	0.369028	0.82	0.324	4.32038e-62	Alveolar Macrophages	Sf1
Ctsl	3.37618e-66	0.559699	0.92	0.448	6.38233e-62	Alveolar Macrophages	Ctsl
Atp6v0b	3.41842e-66	0.591326	0.987	0.762	6.46218e-62	Alveolar Macrophages	Atp6v0b
Manf	3.82876e-66	0.441644	0.871	0.358	7.23788e-62	Alveolar Macrophages	Manf
Atp5mpl	4.50167e-66	0.602976	0.972	0.565	8.50996e-62	Alveolar Macrophages	Atp5mpl
Ppp2r1a	4.99613e-66	0.353345	0.805	0.323	9.44468e-62	Alveolar Macrophages	Ppp2r1a
Aftph	5.07369e-66	0.269161	0.699	0.247	9.5913e-62	Alveolar Macrophages	Aftph
Cops6	6.78761e-66	0.278294	0.735	0.263	1.28313e-61	Alveolar Macrophages	Cops6
Alyref	8.05424e-66	0.285084	0.743	0.264	1.52257e-61	Alveolar Macrophages	Alyref
Serbp1	8.29726e-66	0.615287	0.974	0.574	1.56851e-61	Alveolar Macrophages	Serbp1
Stxbp2	9.76086e-66	0.484102	0.869	0.388	1.84519e-61	Alveolar Macrophages	Stxbp2
Cycs	9.97776e-66	0.442273	0.918	0.391	1.8862e-61	Alveolar Macrophages	Cycs
Ndufv1	1.0624e-65	0.255055	0.638	0.217	2.00836e-61	Alveolar Macrophages	Ndufv1
Clec4a2	1.26987e-65	0.510901	0.851	0.35	2.40056e-61	Alveolar Macrophages	Clec4a2
Nt5c	1.34769e-65	0.287989	0.774	0.271	2.54768e-61	Alveolar Macrophages	Nt5c
Ndufs2	1.50429e-65	0.429232	0.859	0.354	2.8437e-61	Alveolar Macrophages	Ndufs2
Iqsec1	1.83232e-65	0.434415	0.884	0.383	3.46381e-61	Alveolar Macrophages	Iqsec1
Pebp1	2.04476e-65	0.316978	0.856	0.333	3.86541e-61	Alveolar Macrophages	Pebp1
Fam50a	2.93995e-65	0.268111	0.671	0.234	5.55768e-61	Alveolar Macrophages	Fam50a
Ewsr1	6.57873e-65	0.375624	0.882	0.376	1.24364e-60	Alveolar Macrophages	Ewsr1
U2surp	8.94436e-65	0.254567	0.728	0.262	1.69084e-60	Alveolar Macrophages	U2surp
Rpl37a	1.43427e-64	0.648632	1	0.962	2.71134e-60	Alveolar Macrophages	Rpl37a
Srp72	1.69067e-64	0.279309	0.738	0.269	3.19604e-60	Alveolar Macrophages	Srp72
Capza2	1.70323e-64	0.595763	0.982	0.748	3.21978e-60	Alveolar Macrophages	Capza2
Ptbp3	2.62352e-64	0.63574	0.967	0.701	4.9595e-60	Alveolar Macrophages	Ptbp3
Tapbp	4.51846e-64	0.577884	0.967	0.572	8.54169e-60	Alveolar Macrophages	Tapbp
Psmc1	4.55696e-64	0.252208	0.604	0.204	8.61447e-60	Alveolar Macrophages	Psmc1
Dad1	4.60632e-64	0.485807	0.954	0.452	8.7078e-60	Alveolar Macrophages	Dad1
Pcbp1	4.76506e-64	0.579942	0.961	0.54	9.00787e-60	Alveolar Macrophages	Pcbp1
Gna13	7.22825e-64	0.449369	0.889	0.401	1.36643e-59	Alveolar Macrophages	Gna13
Rps6ka1	8.66946e-64	0.314105	0.661	0.237	1.63887e-59	Alveolar Macrophages	Rps6ka1
Dnajc5	9.19517e-64	0.42281	0.889	0.398	1.73826e-59	Alveolar Macrophages	Dnajc5
Zfp91	1.21765e-63	0.354732	0.825	0.335	2.30185e-59	Alveolar Macrophages	Zfp91
Tbrg1	1.91505e-63	0.31628	0.787	0.308	3.62021e-59	Alveolar Macrophages	Tbrg1
Ppp1r15b	2.0184e-63	0.46577	0.851	0.381	3.81559e-59	Alveolar Macrophages	Ppp1r15b
Tsn	2.22299e-63	0.274275	0.848	0.328	4.20234e-59	Alveolar Macrophages	Tsn
Rpl7a	2.4596e-63	0.713336	0.99	0.731	4.64963e-59	Alveolar Macrophages	Rpl7a
Blvrb	3.1114e-63	0.396407	0.692	0.254	5.88178e-59	Alveolar Macrophages	Blvrb
Naa38	3.88335e-63	0.257613	0.63	0.214	7.34108e-59	Alveolar Macrophages	Naa38
Rab1a	3.91741e-63	0.470835	0.895	0.431	7.40547e-59	Alveolar Macrophages	Rab1a
Med28	4.61327e-63	0.350034	0.787	0.312	8.72093e-59	Alveolar Macrophages	Med28
Vamp4	5.27038e-63	0.353313	0.817	0.324	9.96313e-59	Alveolar Macrophages	Vamp4
Matr3	6.33448e-63	0.26844	0.81	0.307	1.19747e-58	Alveolar Macrophages	Matr3
Pum1	7.14439e-63	0.254721	0.707	0.254	1.35058e-58	Alveolar Macrophages	Pum1
Chchd2	8.50817e-63	0.532999	0.985	0.893	1.60839e-58	Alveolar Macrophages	Chchd2
Rps2	1.10949e-62	0.676912	0.995	0.827	2.09739e-58	Alveolar Macrophages	Rps2
Eif1a	1.31512e-62	0.309355	0.779	0.302	2.4861e-58	Alveolar Macrophages	Eif1a
Ggnbp2	1.4438e-62	0.393473	0.869	0.378	2.72937e-58	Alveolar Macrophages	Ggnbp2
Pdcd5	1.54159e-62	0.314667	0.846	0.345	2.91422e-58	Alveolar Macrophages	Pdcd5
Elavl1	1.81021e-62	0.332125	0.766	0.303	3.42203e-58	Alveolar Macrophages	Elavl1
Hnrnpa3	2.29591e-62	0.5682	0.972	0.537	4.34019e-58	Alveolar Macrophages	Hnrnpa3
Vti1b	2.3781e-62	0.389162	0.805	0.34	4.49555e-58	Alveolar Macrophages	Vti1b
Etf1	2.5505e-62	0.389361	0.784	0.32	4.82146e-58	Alveolar Macrophages	Etf1
Golga7	3.37398e-62	0.279278	0.743	0.281	6.37817e-58	Alveolar Macrophages	Golga7
Plec	4.43194e-62	0.360158	0.789	0.326	8.37814e-58	Alveolar Macrophages	Plec
Bst1	6.17313e-62	0.472093	0.931	0.444	1.16697e-57	Alveolar Macrophages	Bst1
Vps29	7.63325e-62	0.466378	0.928	0.455	1.44299e-57	Alveolar Macrophages	Vps29
Ap3b1	8.67328e-62	0.273939	0.681	0.248	1.6396e-57	Alveolar Macrophages	Ap3b1
Bax	1.35666e-61	0.477617	0.905	0.398	2.56463e-57	Alveolar Macrophages	Bax
Cops9	1.40269e-61	0.540385	0.954	0.495	2.65165e-57	Alveolar Macrophages	Cops9
Emc2	3.00562e-61	0.309035	0.738	0.289	5.68182e-57	Alveolar Macrophages	Emc2
Polr2g	3.09337e-61	0.365431	0.825	0.342	5.8477e-57	Alveolar Macrophages	Polr2g
Mindy2	5.54991e-61	0.313207	0.725	0.28	1.04916e-56	Alveolar Macrophages	Mindy2
Efhd2	9.17425e-61	0.552563	0.959	0.529	1.7343e-56	Alveolar Macrophages	Efhd2
Rack1	9.74893e-61	0.686256	0.995	0.738	1.84294e-56	Alveolar Macrophages	Rack1
Rtraf	1.34366e-60	0.484147	0.905	0.42	2.54006e-56	Alveolar Macrophages	Rtraf
Actb	1.75638e-60	0.534977	1	0.997	3.32026e-56	Alveolar Macrophages	Actb
Ergic3	2.39336e-60	0.317239	0.766	0.308	4.52442e-56	Alveolar Macrophages	Ergic3
Cnot6l	2.71213e-60	0.294573	0.817	0.326	5.127e-56	Alveolar Macrophages	Cnot6l
Psmd7	3.32036e-60	0.263171	0.74	0.285	6.27682e-56	Alveolar Macrophages	Psmd7
Tcea1	6.19408e-60	0.291591	0.792	0.313	1.17093e-55	Alveolar Macrophages	Tcea1
Ndufs8	6.63692e-60	0.299743	0.784	0.303	1.25464e-55	Alveolar Macrophages	Ndufs8
Kdelr1	8.04617e-60	0.370936	0.892	0.388	1.52105e-55	Alveolar Macrophages	Kdelr1
Yeats4	9.12041e-60	0.313367	0.787	0.314	1.72412e-55	Alveolar Macrophages	Yeats4
Rpl14	1.06898e-59	0.615298	0.997	0.621	2.02081e-55	Alveolar Macrophages	Rpl14
Ndufv3	1.7775e-59	0.453541	0.91	0.43	3.36018e-55	Alveolar Macrophages	Ndufv3
Eif3d	2.19335e-59	0.259367	0.743	0.277	4.1463e-55	Alveolar Macrophages	Eif3d
Ncf1	2.26075e-59	0.505015	0.918	0.447	4.27373e-55	Alveolar Macrophages	Ncf1
Tax1bp3	2.68589e-59	0.25947	0.72	0.267	5.07741e-55	Alveolar Macrophages	Tax1bp3
Rab5c	3.02688e-59	0.546935	0.956	0.591	5.72201e-55	Alveolar Macrophages	Rab5c
Snrpd2	3.30612e-59	0.354558	0.887	0.374	6.24989e-55	Alveolar Macrophages	Snrpd2
Aamp	4.12381e-59	0.371586	0.861	0.383	7.79565e-55	Alveolar Macrophages	Aamp
Selenot	5.25508e-59	0.316239	0.805	0.329	9.9342e-55	Alveolar Macrophages	Selenot
Prkcd	6.12939e-59	0.519222	0.938	0.513	1.1587e-54	Alveolar Macrophages	Prkcd
Cuta	6.42259e-59	0.43135	0.866	0.374	1.21413e-54	Alveolar Macrophages	Cuta
Pik3r5	8.10247e-59	0.320214	0.717	0.274	1.53169e-54	Alveolar Macrophages	Pik3r5
Cd300c2	1.03645e-58	0.490405	0.972	0.511	1.95931e-54	Alveolar Macrophages	Cd300c2
Cetn3	1.5672e-58	0.256526	0.81	0.323	2.96263e-54	Alveolar Macrophages	Cetn3
Rps28	2.03924e-58	0.683839	1	0.827	3.85498e-54	Alveolar Macrophages	Rps28
Tmem165	2.17361e-58	0.259982	0.743	0.29	4.10899e-54	Alveolar Macrophages	Tmem165
Cdkn1a	2.44464e-58	0.645659	0.879	0.394	4.62135e-54	Alveolar Macrophages	Cdkn1a
Llph	2.97422e-58	0.464405	0.928	0.442	5.62247e-54	Alveolar Macrophages	Llph
G3bp2	3.40072e-58	0.458926	0.879	0.404	6.42871e-54	Alveolar Macrophages	G3bp2
Sarnp	3.47432e-58	0.344398	0.851	0.353	6.56785e-54	Alveolar Macrophages	Sarnp
Hnrnpul2	4.89709e-58	0.345013	0.828	0.355	9.25746e-54	Alveolar Macrophages	Hnrnpul2
Ilk	5.53359e-58	0.305973	0.838	0.347	1.04607e-53	Alveolar Macrophages	Ilk
Cyp51	9.60029e-58	0.312417	0.301	0.075	1.81484e-53	Alveolar Macrophages	Cyp51
Snrpb	1.10828e-57	0.518037	0.977	0.542	2.09509e-53	Alveolar Macrophages	Snrpb
Mgst1	1.41488e-57	0.578013	0.974	0.484	2.6747e-53	Alveolar Macrophages	Mgst1
Krcc1	2.08906e-57	0.450142	0.861	0.405	3.94915e-53	Alveolar Macrophages	Krcc1
Snrpd3	2.33086e-57	0.336019	0.856	0.368	4.40625e-53	Alveolar Macrophages	Snrpd3
Ndufa2	2.81074e-57	0.542951	0.972	0.611	5.31342e-53	Alveolar Macrophages	Ndufa2
Cln5	3.07077e-57	0.287805	0.625	0.229	5.80498e-53	Alveolar Macrophages	Cln5
Fpr1	7.26432e-57	0.296002	0.828	0.324	1.37325e-52	Alveolar Macrophages	Fpr1
Aph1a	7.76762e-57	0.300843	0.835	0.348	1.46839e-52	Alveolar Macrophages	Aph1a
Calm1	9.72074e-57	0.455984	0.995	0.958	1.83761e-52	Alveolar Macrophages	Calm1
Snrpf	1.18357e-56	0.290279	0.853	0.337	2.23743e-52	Alveolar Macrophages	Snrpf
Brd2	1.25457e-56	0.429778	0.9	0.438	2.37164e-52	Alveolar Macrophages	Brd2
Stx8	1.52274e-56	0.261258	0.663	0.24	2.87859e-52	Alveolar Macrophages	Stx8
Prex1	1.87678e-56	0.37987	0.853	0.386	3.54787e-52	Alveolar Macrophages	Prex1
Atp5k	2.04043e-56	0.519919	0.974	0.555	3.85722e-52	Alveolar Macrophages	Atp5k
Ptp4a2	2.80301e-56	0.507242	0.972	0.56	5.29881e-52	Alveolar Macrophages	Ptp4a2
Rpl5	3.1014e-56	0.487325	0.99	0.608	5.86289e-52	Alveolar Macrophages	Rpl5
Copz1	3.26986e-56	0.328394	0.763	0.308	6.18134e-52	Alveolar Macrophages	Copz1
Txn2	5.92766e-56	0.308625	0.712	0.282	1.12056e-51	Alveolar Macrophages	Txn2
Surf4	8.86047e-56	0.392117	0.815	0.355	1.67498e-51	Alveolar Macrophages	Surf4
Ndufa11	9.96328e-56	0.348374	0.861	0.375	1.88346e-51	Alveolar Macrophages	Ndufa11
Ppia	1.03043e-55	0.646654	0.995	0.792	1.94793e-51	Alveolar Macrophages	Ppia
Chic2	1.11163e-55	0.488852	0.925	0.516	2.10142e-51	Alveolar Macrophages	Chic2
Rpl10a	1.24616e-55	0.577179	0.995	0.567	2.35574e-51	Alveolar Macrophages	Rpl10a
Lsm6	1.46804e-55	0.253537	0.712	0.272	2.77518e-51	Alveolar Macrophages	Lsm6
Cox7b	4.54918e-55	0.521032	0.949	0.502	8.59976e-51	Alveolar Macrophages	Cox7b
Celf2	6.16209e-55	0.52657	0.956	0.593	1.16488e-50	Alveolar Macrophages	Celf2
Abracl	6.47204e-55	0.574581	0.982	0.647	1.22347e-50	Alveolar Macrophages	Abracl
Bsg	8.1059e-55	0.428085	0.954	0.538	1.53234e-50	Alveolar Macrophages	Bsg
Cox6c	1.45662e-54	0.578869	0.992	0.773	2.75359e-50	Alveolar Macrophages	Cox6c
Cept1	2.30734e-54	0.280822	0.771	0.318	4.36179e-50	Alveolar Macrophages	Cept1
Eef1a1	2.36613e-54	0.683729	1	0.938	4.47294e-50	Alveolar Macrophages	Eef1a1
Rpl36a	2.75567e-54	0.534658	0.99	0.615	5.20932e-50	Alveolar Macrophages	Rpl36a
Rps26	3.14783e-54	0.556936	0.995	0.824	5.95066e-50	Alveolar Macrophages	Rps26
Tmem30a	9.73599e-54	0.372626	0.884	0.426	1.84049e-49	Alveolar Macrophages	Tmem30a
Tm9sf2	1.7455e-53	0.283275	0.843	0.363	3.29969e-49	Alveolar Macrophages	Tm9sf2
Purb	2.44094e-53	0.420817	0.869	0.435	4.61435e-49	Alveolar Macrophages	Purb
Psmb5	2.54962e-53	0.486087	0.931	0.491	4.81981e-49	Alveolar Macrophages	Psmb5
Ssb	2.96581e-53	0.336995	0.895	0.408	5.60657e-49	Alveolar Macrophages	Ssb
Rab11b	3.04443e-53	0.397534	0.936	0.46	5.75519e-49	Alveolar Macrophages	Rab11b
Atp5o	3.17103e-53	0.371483	0.907	0.421	5.99452e-49	Alveolar Macrophages	Atp5o
Myl6	3.37529e-53	0.457836	0.995	0.966	6.38065e-49	Alveolar Macrophages	Myl6
Diaph1	3.56507e-53	0.561271	0.956	0.625	6.7394e-49	Alveolar Macrophages	Diaph1
Naca	5.08127e-53	0.598013	0.992	0.762	9.60563e-49	Alveolar Macrophages	Naca
Rpl41	5.70055e-53	0.471474	1	0.989	1.07763e-48	Alveolar Macrophages	Rpl41
Dnajc3	1.34591e-52	0.311287	0.835	0.36	2.5443e-48	Alveolar Macrophages	Dnajc3
Spag9	1.39341e-52	0.368943	0.871	0.416	2.63409e-48	Alveolar Macrophages	Spag9
Lnpep	1.4981e-52	0.450795	0.918	0.481	2.83202e-48	Alveolar Macrophages	Lnpep
Cyc1	1.52828e-52	0.276251	0.73	0.291	2.88906e-48	Alveolar Macrophages	Cyc1
Rps20	1.93753e-52	0.445351	1	0.818	3.6627e-48	Alveolar Macrophages	Rps20
Hook3	2.37897e-52	0.307342	0.794	0.35	4.4972e-48	Alveolar Macrophages	Hook3
Eef1d	2.39288e-52	0.447393	0.938	0.469	4.5235e-48	Alveolar Macrophages	Eef1d
Uba1	3.04196e-52	0.305441	0.781	0.333	5.75051e-48	Alveolar Macrophages	Uba1
Qk	5.11404e-52	0.339362	0.931	0.474	9.66758e-48	Alveolar Macrophages	Qk
Rpl23	6.38506e-52	0.502144	1	0.958	1.20703e-47	Alveolar Macrophages	Rpl23
Ldlr	1.05845e-51	0.544759	0.409	0.139	2.00089e-47	Alveolar Macrophages	Ldlr
Fam173a	1.09502e-51	0.293436	0.743	0.31	2.07003e-47	Alveolar Macrophages	Fam173a
Eif3e	1.87875e-51	0.340023	0.892	0.385	3.55158e-47	Alveolar Macrophages	Eif3e
Psmb7	3.09012e-51	0.255428	0.781	0.327	5.84156e-47	Alveolar Macrophages	Psmb7
Nckap1l	3.56202e-51	0.328024	0.838	0.365	6.73364e-47	Alveolar Macrophages	Nckap1l
Polr2e	4.2094e-51	0.260949	0.763	0.305	7.95745e-47	Alveolar Macrophages	Polr2e
Rps8	4.2558e-51	0.574882	1	0.87	8.04517e-47	Alveolar Macrophages	Rps8
Tuba4a	5.30067e-51	0.368982	0.792	0.345	1.00204e-46	Alveolar Macrophages	Tuba4a
Sod2	6.71435e-51	0.2767	0.874	0.386	1.26928e-46	Alveolar Macrophages	Sod2
Arhgef3	9.53328e-51	0.258567	0.799	0.346	1.80217e-46	Alveolar Macrophages	Arhgef3
Usp25	1.27224e-50	0.340997	0.815	0.365	2.40505e-46	Alveolar Macrophages	Usp25
Rpl10	1.28559e-50	0.628948	0.997	0.889	2.43029e-46	Alveolar Macrophages	Rpl10
Stx7	1.29227e-50	0.441809	0.905	0.46	2.4429e-46	Alveolar Macrophages	Stx7
Eif3i	1.36269e-50	0.306783	0.835	0.338	2.57604e-46	Alveolar Macrophages	Eif3i
Iqgap2	1.69206e-50	0.255174	0.491	0.171	3.19867e-46	Alveolar Macrophages	Iqgap2
Ctbp1	2.23571e-50	0.269343	0.771	0.328	4.22638e-46	Alveolar Macrophages	Ctbp1
Hpcal1	2.24128e-50	0.474036	0.938	0.508	4.23692e-46	Alveolar Macrophages	Hpcal1
Plcg2	3.38275e-50	0.258496	0.704	0.281	6.39475e-46	Alveolar Macrophages	Plcg2
Timm23	3.79732e-50	0.254359	0.807	0.331	7.17846e-46	Alveolar Macrophages	Timm23
Ndufb5	4.55554e-50	0.381396	0.889	0.399	8.61179e-46	Alveolar Macrophages	Ndufb5
Hnrnpm	5.23315e-50	0.348626	0.918	0.438	9.89274e-46	Alveolar Macrophages	Hnrnpm
Rab6a	1.05852e-49	0.2675	0.828	0.361	2.00102e-45	Alveolar Macrophages	Rab6a
Set	1.1593e-49	0.367557	0.949	0.463	2.19155e-45	Alveolar Macrophages	Set
Ndufb8	1.50908e-49	0.466911	0.951	0.557	2.85277e-45	Alveolar Macrophages	Ndufb8
Ndufs6	1.54856e-49	0.356291	0.895	0.429	2.9274e-45	Alveolar Macrophages	Ndufs6
Uqcrfs1	1.73334e-49	0.372249	0.897	0.403	3.2767e-45	Alveolar Macrophages	Uqcrfs1
Uqcrq	1.80836e-49	0.495376	0.972	0.675	3.41852e-45	Alveolar Macrophages	Uqcrq
Gpcpd1	2.04688e-49	0.504992	0.959	0.637	3.86943e-45	Alveolar Macrophages	Gpcpd1
Psma4	2.67375e-49	0.340099	0.874	0.399	5.05445e-45	Alveolar Macrophages	Psma4
Acbd3	2.83274e-49	0.250614	0.71	0.291	5.35501e-45	Alveolar Macrophages	Acbd3
Bri3	2.86243e-49	0.521803	0.974	0.703	5.41115e-45	Alveolar Macrophages	Bri3
Tgoln1	3.11968e-49	0.342608	0.9	0.45	5.89744e-45	Alveolar Macrophages	Tgoln1
Dync1i2	3.53757e-49	0.381769	0.907	0.47	6.68743e-45	Alveolar Macrophages	Dync1i2
Atp6v1d	3.68114e-49	0.325924	0.794	0.358	6.95883e-45	Alveolar Macrophages	Atp6v1d
Rwdd1	3.79318e-49	0.26289	0.83	0.353	7.17062e-45	Alveolar Macrophages	Rwdd1
Rpl32	4.14283e-49	0.539919	0.997	0.802	7.8316e-45	Alveolar Macrophages	Rpl32
Polr2a	7.18808e-49	0.307721	0.861	0.396	1.35884e-44	Alveolar Macrophages	Polr2a
Srsf2	7.2359e-49	0.370246	0.913	0.453	1.36787e-44	Alveolar Macrophages	Srsf2
Polr2k	9.16238e-49	0.30324	0.861	0.399	1.73206e-44	Alveolar Macrophages	Polr2k
Mapre1	1.13407e-48	0.356337	0.897	0.452	2.14385e-44	Alveolar Macrophages	Mapre1
Eif2s2	1.50433e-48	0.404755	0.964	0.481	2.84379e-44	Alveolar Macrophages	Eif2s2
Tcf25	1.51289e-48	0.430025	0.943	0.546	2.85996e-44	Alveolar Macrophages	Tcf25
Ufm1	1.64341e-48	0.274336	0.738	0.303	3.10671e-44	Alveolar Macrophages	Ufm1
Cyba	1.83117e-48	0.540511	0.997	0.919	3.46164e-44	Alveolar Macrophages	Cyba
Pqlc1	1.84318e-48	0.257089	0.769	0.336	3.48434e-44	Alveolar Macrophages	Pqlc1
Rps12	2.00729e-48	0.420235	1	0.938	3.79458e-44	Alveolar Macrophages	Rps12
Rab1b	3.57873e-48	0.31577	0.856	0.394	6.76522e-44	Alveolar Macrophages	Rab1b
Itsn2	1.3109e-47	0.286127	0.825	0.373	2.47813e-43	Alveolar Macrophages	Itsn2
Ndufb10	1.64555e-47	0.354512	0.905	0.439	3.11075e-43	Alveolar Macrophages	Ndufb10
Ndufb4	1.90307e-47	0.379402	0.941	0.489	3.59757e-43	Alveolar Macrophages	Ndufb4
Csnk2a1	2.29507e-47	0.31537	0.889	0.437	4.33859e-43	Alveolar Macrophages	Csnk2a1
Txndc17	2.76092e-47	0.400983	0.933	0.48	5.21924e-43	Alveolar Macrophages	Txndc17
Cbl	4.08873e-47	0.386319	0.874	0.435	7.72934e-43	Alveolar Macrophages	Cbl
Srsf9	5.20095e-47	0.36411	0.91	0.435	9.83187e-43	Alveolar Macrophages	Srsf9
Epn1	5.76927e-47	0.361791	0.864	0.411	1.09062e-42	Alveolar Macrophages	Epn1
Furin	6.54431e-47	0.409491	0.92	0.497	1.23714e-42	Alveolar Macrophages	Furin
Slc25a3	6.56966e-47	0.48279	0.985	0.723	1.24193e-42	Alveolar Macrophages	Slc25a3
Tmem219	7.28299e-47	0.257814	0.648	0.26	1.37678e-42	Alveolar Macrophages	Tmem219
Tnfrsf1b	7.70672e-47	0.253631	0.846	0.371	1.45688e-42	Alveolar Macrophages	Tnfrsf1b
Ubc	9.95662e-47	0.604611	0.974	0.768	1.8822e-42	Alveolar Macrophages	Ubc
Krtcap2	1.08316e-46	0.254679	0.879	0.373	2.04761e-42	Alveolar Macrophages	Krtcap2
Apoc1	1.19344e-46	0.591337	0.224	0.054	2.25607e-42	Alveolar Macrophages	Apoc1
Hspa5	1.86487e-46	0.590395	0.967	0.666	3.52535e-42	Alveolar Macrophages	Hspa5
Flii	2.00952e-46	0.276151	0.771	0.345	3.7988e-42	Alveolar Macrophages	Flii
Rps15	2.42989e-46	0.388286	0.992	0.761	4.59347e-42	Alveolar Macrophages	Rps15
Aldh3b1	2.68122e-46	0.337861	0.802	0.366	5.06857e-42	Alveolar Macrophages	Aldh3b1
Rpl22	3.43934e-46	0.520448	0.995	0.759	6.50172e-42	Alveolar Macrophages	Rpl22
Tmem14c	7.63853e-46	0.47391	0.979	0.705	1.44399e-41	Alveolar Macrophages	Tmem14c
Spcs1	7.96358e-46	0.366887	0.882	0.446	1.50544e-41	Alveolar Macrophages	Spcs1
Tmod3	8.02717e-46	0.276775	0.851	0.403	1.51746e-41	Alveolar Macrophages	Tmod3
Tm9sf3	8.83632e-46	0.381416	0.915	0.489	1.67042e-41	Alveolar Macrophages	Tm9sf3
Degs1	1.81197e-45	0.35195	0.892	0.425	3.42535e-41	Alveolar Macrophages	Degs1
Rbms1	2.06905e-45	0.431123	0.969	0.637	3.91134e-41	Alveolar Macrophages	Rbms1
Rpl35	2.07316e-45	0.515036	0.992	0.723	3.9191e-41	Alveolar Macrophages	Rpl35
Pum2	5.37763e-45	0.285179	0.866	0.411	1.01659e-40	Alveolar Macrophages	Pum2
Ptpre	6.67429e-45	0.409203	0.905	0.489	1.26171e-40	Alveolar Macrophages	Ptpre
Pfdn2	8.13927e-45	0.305536	0.9	0.423	1.53865e-40	Alveolar Macrophages	Pfdn2
Trpc4ap	8.75183e-45	0.273861	0.805	0.364	1.65445e-40	Alveolar Macrophages	Trpc4ap
Uqcrc2	1.55239e-44	0.262528	0.761	0.332	2.93464e-40	Alveolar Macrophages	Uqcrc2
Ndufv2	3.40595e-44	0.273304	0.828	0.374	6.4386e-40	Alveolar Macrophages	Ndufv2
Phip	3.50646e-44	0.258726	0.73	0.318	6.62861e-40	Alveolar Macrophages	Phip
Abi1	1.96817e-43	0.337703	0.902	0.465	3.72063e-39	Alveolar Macrophages	Abi1
Gsk3b	2.82461e-43	0.362728	0.902	0.504	5.33965e-39	Alveolar Macrophages	Gsk3b
Ndufb3	4.73626e-43	0.324528	0.9	0.444	8.95343e-39	Alveolar Macrophages	Ndufb3
Eif3m	5.42169e-43	0.277919	0.866	0.383	1.02492e-38	Alveolar Macrophages	Eif3m
Ptma	5.84947e-43	0.469536	1	0.809	1.10578e-38	Alveolar Macrophages	Ptma
Ssr4	1.25347e-42	0.399742	0.928	0.464	2.36956e-38	Alveolar Macrophages	Ssr4
Nono	1.41073e-42	0.252203	0.82	0.364	2.66684e-38	Alveolar Macrophages	Nono
Rpsa	2.53562e-42	0.325763	0.997	0.799	4.79333e-38	Alveolar Macrophages	Rpsa
Micos13	2.93986e-42	0.313292	0.861	0.43	5.55751e-38	Alveolar Macrophages	Micos13
Rpl38	3.26295e-42	0.448838	1	0.925	6.16827e-38	Alveolar Macrophages	Rpl38
Smdt1	3.86685e-42	0.440229	0.959	0.6	7.30989e-38	Alveolar Macrophages	Smdt1
Ndufs7	4.14921e-42	0.308195	0.887	0.44	7.84366e-38	Alveolar Macrophages	Ndufs7
Papola	4.22675e-42	0.270644	0.841	0.395	7.99026e-38	Alveolar Macrophages	Papola
Tm6sf1	4.29806e-42	0.368431	0.859	0.428	8.12505e-38	Alveolar Macrophages	Tm6sf1
Znrf1	4.35312e-42	0.252985	0.815	0.388	8.22914e-38	Alveolar Macrophages	Znrf1
Snrpe	5.91412e-42	0.373591	0.941	0.478	1.11801e-37	Alveolar Macrophages	Snrpe
Rpl6	7.35516e-42	0.481896	1	0.818	1.39042e-37	Alveolar Macrophages	Rpl6
Mrps14	1.08479e-41	0.273376	0.877	0.417	2.05069e-37	Alveolar Macrophages	Mrps14
Rnpep	1.48565e-41	0.345892	0.866	0.423	2.80847e-37	Alveolar Macrophages	Rnpep
0610012G03Rik	1.5615e-41	0.271359	0.725	0.321	2.95186e-37	Alveolar Macrophages	0610012G03Rik
Ppt1	6.32927e-41	0.324791	0.938	0.522	1.19649e-36	Alveolar Macrophages	Ppt1
Eef1g	9.06964e-41	0.271721	0.943	0.491	1.71452e-36	Alveolar Macrophages	Eef1g
Arpc4	1.13259e-40	0.48692	0.979	0.748	2.14105e-36	Alveolar Macrophages	Arpc4
Hnrnpa2b1	1.15448e-40	0.435805	0.964	0.689	2.18243e-36	Alveolar Macrophages	Hnrnpa2b1
Mien1	1.57199e-40	0.311575	0.866	0.428	2.97168e-36	Alveolar Macrophages	Mien1
Zfp36l2	2.4462e-40	0.527091	0.967	0.767	4.62429e-36	Alveolar Macrophages	Zfp36l2
Myl12a	8.97459e-40	0.356451	0.982	0.761	1.69656e-35	Alveolar Macrophages	Myl12a
Nktr	1.24688e-39	0.291818	0.877	0.455	2.3571e-35	Alveolar Macrophages	Nktr
Rab8b	1.35288e-39	0.345851	0.943	0.521	2.55748e-35	Alveolar Macrophages	Rab8b
Ubap2l	1.47929e-39	0.273973	0.848	0.413	2.79646e-35	Alveolar Macrophages	Ubap2l
Riok3	1.83459e-39	0.379208	0.918	0.512	3.46811e-35	Alveolar Macrophages	Riok3
Atp5h	3.40234e-39	0.417456	0.987	0.716	6.43178e-35	Alveolar Macrophages	Atp5h
Sptlc2	3.49489e-39	0.264239	0.884	0.451	6.60673e-35	Alveolar Macrophages	Sptlc2
Rpl31	3.98965e-39	0.400339	0.982	0.642	7.54203e-35	Alveolar Macrophages	Rpl31
Dock2	4.80847e-39	0.321549	0.887	0.477	9.08994e-35	Alveolar Macrophages	Dock2
Atp5d	1.28649e-38	0.414675	0.946	0.583	2.43198e-34	Alveolar Macrophages	Atp5d
Arpc2	1.38491e-38	0.406438	0.992	0.921	2.61804e-34	Alveolar Macrophages	Arpc2
Rpl39	1.7617e-38	0.325726	1	0.946	3.33032e-34	Alveolar Macrophages	Rpl39
Atp5j2	1.76899e-38	0.438633	0.985	0.747	3.34409e-34	Alveolar Macrophages	Atp5j2
Tacc1	2.68097e-38	0.270419	0.871	0.45	5.0681e-34	Alveolar Macrophages	Tacc1
Peli1	3.30899e-38	0.280964	0.828	0.394	6.25531e-34	Alveolar Macrophages	Peli1
Qsox1	5.62523e-38	0.310069	0.874	0.454	1.06339e-33	Alveolar Macrophages	Qsox1
Rpl4	8.96928e-38	0.332382	0.987	0.621	1.69555e-33	Alveolar Macrophages	Rpl4
Mrpl14	8.98691e-38	0.341463	0.905	0.501	1.69889e-33	Alveolar Macrophages	Mrpl14
Mtpn	1.16106e-37	0.396518	0.959	0.6	2.19486e-33	Alveolar Macrophages	Mtpn
Rpl36al	1.21087e-37	0.331607	0.982	0.521	2.28903e-33	Alveolar Macrophages	Rpl36al
Gm16286	1.44903e-37	0.301208	0.882	0.462	2.73924e-33	Alveolar Macrophages	Gm16286
Fus	3.19171e-37	0.314724	0.941	0.57	6.0336e-33	Alveolar Macrophages	Fus
Psmb3	3.23879e-37	0.366095	0.959	0.559	6.12261e-33	Alveolar Macrophages	Psmb3
Idi1	3.8338e-37	0.305374	0.301	0.098	7.24742e-33	Alveolar Macrophages	Idi1
Chmp3	7.48614e-37	0.256026	0.879	0.456	1.41518e-32	Alveolar Macrophages	Chmp3
Ost4	9.88758e-37	0.403883	0.982	0.79	1.86915e-32	Alveolar Macrophages	Ost4
Atp5c1	1.63992e-36	0.371961	0.959	0.578	3.10011e-32	Alveolar Macrophages	Atp5c1
Rpl35a	1.81643e-36	0.385649	0.997	0.935	3.43378e-32	Alveolar Macrophages	Rpl35a
Git2	2.67089e-36	0.260638	0.846	0.441	5.04905e-32	Alveolar Macrophages	Git2
Msmo1	3.48476e-36	0.296706	0.404	0.155	6.58759e-32	Alveolar Macrophages	Msmo1
Rps11	3.63921e-36	0.36685	0.995	0.923	6.87957e-32	Alveolar Macrophages	Rps11
Snx3	1.15668e-35	0.356898	0.967	0.646	2.1866e-31	Alveolar Macrophages	Snx3
Rpl3	1.36301e-35	0.31986	0.997	0.567	2.57664e-31	Alveolar Macrophages	Rpl3
Spata7	1.86349e-35	0.514094	0.188	0.046	3.52274e-31	Alveolar Macrophages	Spata7
Rps5	2.48698e-35	0.292326	0.997	0.827	4.7014e-31	Alveolar Macrophages	Rps5
Atf4	4.61008e-35	0.314675	0.918	0.519	8.71489e-31	Alveolar Macrophages	Atf4
Lcp1	6.90901e-35	0.455539	0.979	0.836	1.30608e-30	Alveolar Macrophages	Lcp1
Lamtor4	1.01704e-34	0.36432	0.936	0.514	1.92261e-30	Alveolar Macrophages	Lamtor4
Itgal	2.65396e-34	0.282345	0.938	0.562	5.01704e-30	Alveolar Macrophages	Itgal
Sin3b	4.16194e-34	0.353656	0.905	0.509	7.86772e-30	Alveolar Macrophages	Sin3b
Psmb2	5.35559e-34	0.253939	0.889	0.447	1.01242e-29	Alveolar Macrophages	Psmb2
Rpl36	1.44945e-33	0.355762	0.997	0.823	2.74004e-29	Alveolar Macrophages	Rpl36
Ndufa3	1.70817e-33	0.322304	0.923	0.517	3.22912e-29	Alveolar Macrophages	Ndufa3
Rps18	2.99456e-33	0.28739	0.992	0.729	5.66092e-29	Alveolar Macrophages	Rps18
Arhgap30	4.11863e-33	0.392312	0.954	0.596	7.78587e-29	Alveolar Macrophages	Arhgap30
Cisd2	4.25782e-33	0.272016	0.817	0.405	8.04899e-29	Alveolar Macrophages	Cisd2
Atp5e	6.62669e-33	0.386163	0.987	0.877	1.25271e-28	Alveolar Macrophages	Atp5e
Srp14	9.12487e-33	0.329953	0.977	0.711	1.72497e-28	Alveolar Macrophages	Srp14
Calm3	1.20968e-32	0.348522	0.961	0.62	2.28678e-28	Alveolar Macrophages	Calm3
Apbb1ip	1.83746e-32	0.341435	0.964	0.646	3.47353e-28	Alveolar Macrophages	Apbb1ip
Atp6v1e1	2.57709e-32	0.354043	0.941	0.589	4.87173e-28	Alveolar Macrophages	Atp6v1e1
Lamp2	6.04972e-32	0.333415	0.972	0.683	1.14364e-27	Alveolar Macrophages	Lamp2
Psmb4	7.15697e-32	0.28427	0.933	0.516	1.35295e-27	Alveolar Macrophages	Psmb4
Wipf1	8.92475e-32	0.256749	0.882	0.472	1.68713e-27	Alveolar Macrophages	Wipf1
Ier3ip1	1.48507e-31	0.32583	0.928	0.572	2.80738e-27	Alveolar Macrophages	Ier3ip1
Arhgap9	1.95424e-31	0.266539	0.879	0.456	3.69429e-27	Alveolar Macrophages	Arhgap9
Ube2l3	4.04537e-31	0.314827	0.943	0.561	7.64736e-27	Alveolar Macrophages	Ube2l3
Cyth4	4.21281e-31	0.349773	0.907	0.529	7.9639e-27	Alveolar Macrophages	Cyth4
Rassf5	4.78168e-31	0.286227	0.91	0.524	9.03929e-27	Alveolar Macrophages	Rassf5
Gm10076	1.5321e-30	0.367117	0.982	0.738	2.89628e-26	Alveolar Macrophages	Gm10076
Gnas	1.55182e-30	0.274352	0.982	0.742	2.93356e-26	Alveolar Macrophages	Gnas
Unc93b1	1.94006e-30	0.293262	0.946	0.535	3.66749e-26	Alveolar Macrophages	Unc93b1
Hnrnpu	4.05607e-30	0.366674	0.972	0.658	7.6676e-26	Alveolar Macrophages	Hnrnpu
Rpl15	4.69033e-30	0.328344	1	0.798	8.86661e-26	Alveolar Macrophages	Rpl15
Hsbp1	6.29958e-30	0.26926	0.915	0.554	1.19087e-25	Alveolar Macrophages	Hsbp1
Rassf3	1.46757e-29	0.271472	0.895	0.519	2.7743e-25	Alveolar Macrophages	Rassf3
Ndufb1-ps	1.46899e-29	0.337796	0.972	0.752	2.77698e-25	Alveolar Macrophages	Ndufb1-ps
Rpl28	4.06088e-29	0.279104	0.997	0.878	7.67668e-25	Alveolar Macrophages	Rpl28
Uqcr10	5.58176e-29	0.314076	0.961	0.632	1.05518e-24	Alveolar Macrophages	Uqcr10
Ndufa1	9.7468e-28	0.326322	0.967	0.592	1.84254e-23	Alveolar Macrophages	Ndufa1
Micos10	1.18102e-27	0.25635	0.949	0.582	2.2326e-23	Alveolar Macrophages	Micos10
Ubxn1	1.71117e-27	0.321511	0.951	0.629	3.2348e-23	Alveolar Macrophages	Ubxn1
Fuca1	2.24777e-27	0.279899	0.938	0.591	4.24918e-23	Alveolar Macrophages	Fuca1
Fermt3	7.29013e-27	0.250286	0.895	0.489	1.37813e-22	Alveolar Macrophages	Fermt3
Eif3k	9.25371e-27	0.310834	0.961	0.619	1.74932e-22	Alveolar Macrophages	Eif3k
Dynll1	3.89834e-26	0.252764	0.974	0.678	7.36941e-22	Alveolar Macrophages	Dynll1
Rpl27	4.70221e-26	0.265447	0.997	0.914	8.88906e-22	Alveolar Macrophages	Rpl27
Rbm3	1.08271e-25	0.327969	0.985	0.784	2.04676e-21	Alveolar Macrophages	Rbm3
Ywhaz	5.5885e-25	0.319537	0.979	0.77	1.05645e-20	Alveolar Macrophages	Ywhaz
Tma7	1.01601e-24	0.315324	0.979	0.759	1.92067e-20	Alveolar Macrophages	Tma7
Akap13	3.73775e-23	0.296984	0.967	0.787	7.06584e-19	Alveolar Macrophages	Akap13
Mcemp1	3.77328e-23	0.285894	0.972	0.611	7.133e-19	Alveolar Macrophages	Mcemp1
Pgd	8.43701e-23	0.274269	0.956	0.559	1.59493e-18	Alveolar Macrophages	Pgd
Ndufb7	3.38653e-22	0.285434	0.969	0.673	6.4019e-18	Alveolar Macrophages	Ndufb7
Man2b1	5.35145e-22	0.256332	0.959	0.668	1.01164e-17	Alveolar Macrophages	Man2b1
Cox7a2	8.72733e-22	0.257219	0.982	0.78	1.64981e-17	Alveolar Macrophages	Cox7a2
[truncated: 16,721 more rows]
