# Supplementary material for: Myeloid cell reprogramming alleviates immunosuppression and promotes clearance of metastatic lesions
Source: Front Oncol. 2022 Nov 21;12:1039993. doi: 10.3389/fonc.2022.1039993 (PMC9720131; doi:10.3389/fonc.2022.1039993)
Supplement: Supplementary Table 2 — List of genes used to classify (A) neutrophil, (B) monocyte, and (C) dendritic cell subsets in . [file DataSheet_1.xlsx]

## Sheet: neut.markers
	p_val	avg_logFC	pct.1	pct.2	p_val_adj	cluster	gene
Pf4	0	4.09212	0.885	0.006	0	chemotactic neutrophils	Pf4
Nrgn	0	3.67015	0.885	0.004	0	chemotactic neutrophils	Nrgn
Ppbp	0	2.65438	0.731	0.002	0	chemotactic neutrophils	Ppbp
Myl9	0	2.55374	0.731	0.002	0	chemotactic neutrophils	Myl9
Clec1b	0	2.39577	0.615	0.005	0	chemotactic neutrophils	Clec1b
Npy	0	2.20812	0.654	0	0	chemotactic neutrophils	Npy
Alox12	0	2.0701	0.692	0.001	0	chemotactic neutrophils	Alox12
Gp9	0	2.02994	0.577	0.001	0	chemotactic neutrophils	Gp9
Treml1	0	1.8815	0.654	0	0	chemotactic neutrophils	Treml1
Ctla2b	0	1.85764	0.615	0.004	0	chemotactic neutrophils	Ctla2b
Clu	0	1.82437	0.615	0.004	0	chemotactic neutrophils	Clu
Parvb	0	1.61472	0.577	0.004	0	chemotactic neutrophils	Parvb
Cd226	0	1.43139	0.462	0.001	0	chemotactic neutrophils	Cd226
Gp5	0	1.42742	0.385	0	0	chemotactic neutrophils	Gp5
Cdc42ep5	0	1.36891	0.423	0.001	0	chemotactic neutrophils	Cdc42ep5
Gp1bb	0	1.04445	0.346	0.001	0	chemotactic neutrophils	Gp1bb
Mpl	0	0.999106	0.308	0	0	chemotactic neutrophils	Mpl
Slc6a4	0	0.930714	0.308	0	0	chemotactic neutrophils	Slc6a4
Samd14	0	0.919276	0.346	0	0	chemotactic neutrophils	Samd14
Gnaz	0	0.899804	0.346	0	0	chemotactic neutrophils	Gnaz
Gp6	0	0.867102	0.346	0.001	0	chemotactic neutrophils	Gp6
Sh3bgrl2	0	0.792608	0.346	0	0	chemotactic neutrophils	Sh3bgrl2
Rab27b	0	0.781581	0.269	0	0	chemotactic neutrophils	Rab27b
Mrvi1	0	0.764395	0.269	0	0	chemotactic neutrophils	Mrvi1
Gm50020	0	0.753985	0.231	0	0	chemotactic neutrophils	Gm50020
Trdc	0	0.731803	0.308	0.001	0	chemotactic neutrophils	Trdc
Slamf1	0	0.692349	0.308	0.001	0	chemotactic neutrophils	Slamf1
Plxna4	0	0.678857	0.346	0	0	chemotactic neutrophils	Plxna4
Tnik	0	0.656977	0.308	0.001	0	chemotactic neutrophils	Tnik
Mmrn1	0	0.6195	0.385	0	0	chemotactic neutrophils	Mmrn1
Pdzk1ip1	0	0.561266	0.269	0	0	chemotactic neutrophils	Pdzk1ip1
Mpig6b	0	0.541459	0.269	0	0	chemotactic neutrophils	Mpig6b
1110028F11Rik	0	0.536402	0.192	0	0	chemotactic neutrophils	1110028F11Rik
Pls1	0	0.466287	0.192	0	0	chemotactic neutrophils	Pls1
Sytl4	0	0.46451	0.231	0	0	chemotactic neutrophils	Sytl4
Lrrn3	0	0.407168	0.192	0	0	chemotactic neutrophils	Lrrn3
Ly6g6f	0	0.326154	0.192	0	0	chemotactic neutrophils	Ly6g6f
Ly6g6c	2.1179e-305	0.462753	0.192	0	4.00369e-301	chemotactic neutrophils	Ly6g6c
Gm10419	1.75399e-293	0.404569	0.154	0	3.31573e-289	chemotactic neutrophils	Gm10419
Cfap97d2	1.75399e-293	0.392005	0.154	0	3.31573e-289	chemotactic neutrophils	Cfap97d2
Ankrd35	1.75399e-293	0.320309	0.154	0	3.31573e-289	chemotactic neutrophils	Ankrd35
Tubb1	1.75399e-293	0.255963	0.154	0	3.31573e-289	chemotactic neutrophils	Tubb1
Adgrg1	1.27738e-292	0.834175	0.308	0.001	2.41476e-288	chemotactic neutrophils	Adgrg1
Ttll11	9.67158e-276	0.768221	0.269	0.001	1.82832e-271	chemotactic neutrophils	Ttll11
Plp1	1.79597e-263	0.361977	0.231	0	3.3951e-259	chemotactic neutrophils	Plp1
Gm30411	8.20846e-262	0.474213	0.192	0	1.55173e-257	chemotactic neutrophils	Gm30411
Ltbp1	9.16231e-262	0.520852	0.192	0	1.73204e-257	chemotactic neutrophils	Ltbp1
Itga2b	1.17331e-242	2.5403	0.731	0.01	2.21803e-238	chemotactic neutrophils	Itga2b
Draxin	1.2855e-220	0.358532	0.115	0	2.4301e-216	chemotactic neutrophils	Draxin
2310034O05Rik	1.2855e-220	0.277223	0.115	0	2.4301e-216	chemotactic neutrophils	2310034O05Rik
Lgalsl	1.5537e-203	0.90205	0.308	0.002	2.93711e-199	chemotactic neutrophils	Lgalsl
Tsc22d1	5.22476e-196	2.68456	0.654	0.01	9.87688e-192	chemotactic neutrophils	Tsc22d1
Bin1	9.38084e-184	1.31721	0.5	0.006	1.77335e-179	chemotactic neutrophils	Bin1
Itga6	3.26865e-178	1.40064	0.462	0.005	6.17906e-174	chemotactic neutrophils	Itga6
Grap2	6.69858e-176	0.526397	0.231	0.001	1.2663e-171	chemotactic neutrophils	Grap2
Rbpms2	1.12954e-175	0.534909	0.231	0.001	2.13529e-171	chemotactic neutrophils	Rbpms2
Gng11	5.7935e-171	3.61074	0.846	0.022	1.0952e-166	chemotactic neutrophils	Gng11
Mfsd2b	7.90138e-171	0.820608	0.269	0.002	1.49368e-166	chemotactic neutrophils	Mfsd2b
Vwf	5.42796e-164	1.28182	0.462	0.006	1.0261e-159	chemotactic neutrophils	Vwf
Snca	3.75824e-161	1.09065	0.308	0.002	7.10458e-157	chemotactic neutrophils	Snca
Tmem158	1.6958e-159	0.907131	0.346	0.003	3.20575e-155	chemotactic neutrophils	Tmem158
Itgb3	1.72781e-159	1.56974	0.538	0.009	3.26626e-155	chemotactic neutrophils	Itgb3
Inf2	6.99986e-149	0.419638	0.269	0.002	1.32325e-144	chemotactic neutrophils	Inf2
4930486L24Rik	4.40069e-147	0.442237	0.154	0	8.31906e-143	chemotactic neutrophils	4930486L24Rik
Fhl1	2.94142e-140	1.48692	0.385	0.005	5.56046e-136	chemotactic neutrophils	Fhl1
Tpm2	7.24975e-132	0.576303	0.231	0.002	1.37049e-127	chemotactic neutrophils	Tpm2
Pdgfa	8.91878e-132	0.467627	0.231	0.002	1.68601e-127	chemotactic neutrophils	Pdgfa
Ctla2a	1.55521e-126	4.59847	0.962	0.041	2.93996e-122	chemotactic neutrophils	Ctla2a
Mylk	6.29252e-124	0.803449	0.423	0.007	1.18954e-119	chemotactic neutrophils	Mylk
Cald1	2.76038e-123	0.786952	0.385	0.006	5.21823e-119	chemotactic neutrophils	Cald1
Ipo11	3.64128e-119	1.19419	0.423	0.007	6.88348e-115	chemotactic neutrophils	Ipo11
Capn3	9.01419e-118	0.460911	0.154	0.001	1.70404e-113	chemotactic neutrophils	Capn3
Thbs1	5.22011e-113	2.04024	0.423	0.008	9.86809e-109	chemotactic neutrophils	Thbs1
Mmd	1.11375e-104	1.23686	0.5	0.012	2.10544e-100	chemotactic neutrophils	Mmd
Pdlim1	3.61767e-100	1.33604	0.462	0.011	6.83884e-96	chemotactic neutrophils	Pdlim1
Sptb	5.22818e-95	0.255843	0.115	0	9.88334e-91	chemotactic neutrophils	Sptb
Nomo1	8.47805e-88	0.9249	0.346	0.007	1.60269e-83	chemotactic neutrophils	Nomo1
Rgs10	2.30362e-85	2.59579	0.615	0.023	4.35475e-81	chemotactic neutrophils	Rgs10
Smtn	1.01813e-79	0.340341	0.192	0.002	1.92467e-75	chemotactic neutrophils	Smtn
Gmpr	1.8119e-79	0.567269	0.269	0.004	3.42522e-75	chemotactic neutrophils	Gmpr
Csrp1	5.94407e-78	0.913005	0.385	0.01	1.12367e-73	chemotactic neutrophils	Csrp1
Maged2	1.4782e-76	0.638611	0.192	0.002	2.79439e-72	chemotactic neutrophils	Maged2
F13a1	1.43949e-72	0.684098	0.308	0.006	2.72121e-68	chemotactic neutrophils	F13a1
Pcp4l1	5.98083e-72	1.05939	0.308	0.007	1.13062e-67	chemotactic neutrophils	Pcp4l1
Scn1b	2.85139e-69	0.277851	0.154	0.001	5.39026e-65	chemotactic neutrophils	Scn1b
Cttn	3.22987e-63	0.391175	0.192	0.003	6.10574e-59	chemotactic neutrophils	Cttn
Itgb5	4.9622e-61	0.953154	0.308	0.008	9.38055e-57	chemotactic neutrophils	Itgb5
Rtl8a	2.86866e-60	0.519065	0.346	0.01	5.42292e-56	chemotactic neutrophils	Rtl8a
Pde5a	9.28511e-60	0.446305	0.231	0.004	1.75526e-55	chemotactic neutrophils	Pde5a
Nckap1	3.96579e-59	0.281659	0.192	0.003	7.49693e-55	chemotactic neutrophils	Nckap1
S100a10	6.59375e-58	2.11582	0.615	0.035	1.24648e-53	chemotactic neutrophils	S100a10
Snn	2.11814e-57	0.414269	0.192	0.003	4.00414e-53	chemotactic neutrophils	Snn
Myct1	1.68731e-51	0.500942	0.269	0.007	3.1897e-47	chemotactic neutrophils	Myct1
Cavin2	2.43082e-49	1.21478	0.385	0.016	4.59521e-45	chemotactic neutrophils	Cavin2
Pla2g12a	5.27752e-46	0.754862	0.192	0.004	9.97662e-42	chemotactic neutrophils	Pla2g12a
Pygb	2.44007e-45	0.612427	0.269	0.008	4.6127e-41	chemotactic neutrophils	Pygb
Mast2	1.06657e-42	0.433385	0.192	0.004	2.01624e-38	chemotactic neutrophils	Mast2
Hba-a1	1.63915e-42	0.800407	0.5	0.031	3.09865e-38	chemotactic neutrophils	Hba-a1
Ramp1	1.66158e-41	0.340934	0.231	0.007	3.14104e-37	chemotactic neutrophils	Ramp1
Rida	2.67669e-38	0.804561	0.231	0.007	5.06002e-34	chemotactic neutrophils	Rida
Pde3a	5.64865e-37	0.324641	0.154	0.003	1.06782e-32	chemotactic neutrophils	Pde3a
Capn2	9.02396e-33	0.357693	0.192	0.006	1.70589e-28	chemotactic neutrophils	Capn2
P2rx1	1.15486e-32	0.634488	0.231	0.009	2.18315e-28	chemotactic neutrophils	P2rx1
Arhgef12	1.34766e-31	0.774498	0.308	0.016	2.54761e-27	chemotactic neutrophils	Arhgef12
Mink1	9.27119e-29	0.54266	0.269	0.013	1.75263e-24	chemotactic neutrophils	Mink1
Samm50	2.17311e-26	0.969782	0.538	0.059	4.10805e-22	chemotactic neutrophils	Samm50
Ormdl3	4.22419e-25	1.38374	0.423	0.038	7.98541e-21	chemotactic neutrophils	Ormdl3
Tubb2a	8.94317e-25	0.953837	0.269	0.016	1.69062e-20	chemotactic neutrophils	Tubb2a
Nck2	2.92195e-24	0.428208	0.154	0.005	5.52365e-20	chemotactic neutrophils	Nck2
Cavin1	6.02449e-24	0.454191	0.231	0.012	1.13887e-19	chemotactic neutrophils	Cavin1
Lat	8.86089e-24	0.380203	0.154	0.005	1.67506e-19	chemotactic neutrophils	Lat
Ppif	4.35737e-23	0.756222	0.269	0.017	8.23718e-19	chemotactic neutrophils	Ppif
Ckb	2.1199e-22	0.275279	0.154	0.006	4.00746e-18	chemotactic neutrophils	Ckb
Plekho1	2.51084e-22	0.770373	0.231	0.013	4.7465e-18	chemotactic neutrophils	Plekho1
Cuedc1	5.70495e-21	0.528469	0.269	0.018	1.07846e-16	chemotactic neutrophils	Cuedc1
Hpse	1.84804e-20	0.322371	0.192	0.01	3.49353e-16	chemotactic neutrophils	Hpse
Cd81	6.1539e-20	1.37496	0.346	0.032	1.16333e-15	chemotactic neutrophils	Cd81
Dhcr24	1.13899e-19	0.428676	0.231	0.015	2.15315e-15	chemotactic neutrophils	Dhcr24
Xpnpep1	1.16104e-19	0.410466	0.231	0.015	2.19483e-15	chemotactic neutrophils	Xpnpep1
Lsm12	2.01545e-19	1.93504	0.846	0.217	3.81e-15	chemotactic neutrophils	Lsm12
Clic4	2.3715e-19	1.00123	0.385	0.04	4.48309e-15	chemotactic neutrophils	Clic4
Ube2o	1.32265e-18	0.538586	0.269	0.021	2.50034e-14	chemotactic neutrophils	Ube2o
Gas2l1	1.42963e-18	0.921655	0.346	0.034	2.70257e-14	chemotactic neutrophils	Gas2l1
Cd151	1.76639e-18	0.781178	0.423	0.05	3.33919e-14	chemotactic neutrophils	Cd151
Arhgap10	2.13734e-18	0.815219	0.231	0.016	4.04043e-14	chemotactic neutrophils	Arhgap10
Nipal3	2.45009e-17	0.67358	0.462	0.064	4.63164e-13	chemotactic neutrophils	Nipal3
Odc1	3.80295e-16	1.85443	0.577	0.111	7.18909e-12	chemotactic neutrophils	Odc1
Aldh1a1	6.77031e-16	0.572476	0.115	0.005	1.27986e-11	chemotactic neutrophils	Aldh1a1
Esam	8.85701e-16	0.69111	0.192	0.013	1.67433e-11	chemotactic neutrophils	Esam
Ecm1	5.64479e-15	1.08858	0.346	0.043	1.06709e-10	chemotactic neutrophils	Ecm1
Tbxas1	9.06682e-15	0.269084	0.192	0.014	1.71399e-10	chemotactic neutrophils	Tbxas1
Pecam1	1.1969e-14	0.439282	0.308	0.034	2.26261e-10	chemotactic neutrophils	Pecam1
Fyn	1.48451e-14	0.343318	0.115	0.005	2.80631e-10	chemotactic neutrophils	Fyn
Ehd4	2.92803e-14	0.677768	0.346	0.044	5.53515e-10	chemotactic neutrophils	Ehd4
F2rl2	1.25382e-13	0.313721	0.269	0.028	2.37023e-09	chemotactic neutrophils	F2rl2
Cat	1.68098e-13	0.56032	0.231	0.021	3.17773e-09	chemotactic neutrophils	Cat
Srxn1	1.80843e-13	0.676118	0.308	0.038	3.41866e-09	chemotactic neutrophils	Srxn1
Zfp664	3.38107e-13	0.356368	0.308	0.036	6.39158e-09	chemotactic neutrophils	Zfp664
Rhoj	5.91025e-13	0.300511	0.115	0.006	1.11727e-08	chemotactic neutrophils	Rhoj
Nucks1	6.43299e-13	0.548409	0.308	0.037	1.21609e-08	chemotactic neutrophils	Nucks1
Lmna	6.84382e-13	0.795455	0.192	0.016	1.29376e-08	chemotactic neutrophils	Lmna
Msi2	2.38483e-12	0.335154	0.231	0.023	4.50827e-08	chemotactic neutrophils	Msi2
Atp2a3	5.9043e-12	1.03974	0.462	0.093	1.11615e-07	chemotactic neutrophils	Atp2a3
Tmem176a	6.20751e-12	0.366013	0.231	0.024	1.17347e-07	chemotactic neutrophils	Tmem176a
Tesc	6.31652e-12	0.959528	0.192	0.017	1.19408e-07	chemotactic neutrophils	Tesc
Ccdc92	6.35056e-12	0.470072	0.154	0.011	1.20051e-07	chemotactic neutrophils	Ccdc92
Palld	6.5771e-12	0.50629	0.231	0.024	1.24333e-07	chemotactic neutrophils	Palld
Tpm1	3.86202e-11	0.406409	0.154	0.012	7.30076e-07	chemotactic neutrophils	Tpm1
Gabarapl1	4.35205e-11	0.505386	0.385	0.065	8.22712e-07	chemotactic neutrophils	Gabarapl1
Pmp22	6.0702e-11	0.365577	0.115	0.007	1.14751e-06	chemotactic neutrophils	Pmp22
Gnas	7.97027e-11	1.80674	0.962	0.588	1.5067e-06	chemotactic neutrophils	Gnas
Prkar2b	1.02867e-10	1.20836	0.615	0.181	1.94459e-06	chemotactic neutrophils	Prkar2b
Cd9	1.61685e-10	2.20002	0.962	0.616	3.0565e-06	chemotactic neutrophils	Cd9
1810058I24Rik	1.65239e-10	2.02759	0.923	0.766	3.12368e-06	chemotactic neutrophils	1810058I24Rik
Birc2	2.89228e-10	0.845906	0.538	0.134	5.46757e-06	chemotactic neutrophils	Birc2
Myl6	3.88645e-10	1.13023	1	0.976	7.34695e-06	chemotactic neutrophils	Myl6
Tm7sf3	7.00934e-10	0.375663	0.192	0.02	1.32505e-05	chemotactic neutrophils	Tm7sf3
S100a1	1.46827e-09	1.13591	0.346	0.066	2.77561e-05	chemotactic neutrophils	S100a1
Mbnl1	2.01436e-09	1.30622	0.577	0.177	3.80795e-05	chemotactic neutrophils	Mbnl1
Tmsb4x	2.09057e-09	0.751693	1	1	3.95202e-05	chemotactic neutrophils	Tmsb4x
Tspan17	2.79814e-09	0.572697	0.269	0.042	5.2896e-05	chemotactic neutrophils	Tspan17
Uba7	2.85229e-09	0.676318	0.462	0.111	5.39198e-05	chemotactic neutrophils	Uba7
Plaat3	3.48694e-09	0.397758	0.231	0.031	6.5917e-05	chemotactic neutrophils	Plaat3
Acer2	5.04335e-09	0.289322	0.115	0.008	9.53396e-05	chemotactic neutrophils	Acer2
Ptpn11	7.01157e-09	0.918358	0.423	0.104	0.000132547	chemotactic neutrophils	Ptpn11
Pttg1ip	1.17337e-08	1.7663	0.731	0.332	0.000221814	chemotactic neutrophils	Pttg1ip
Pea15a	1.71021e-08	0.305545	0.154	0.016	0.000323298	chemotactic neutrophils	Pea15a
Mkrn1	2.90407e-08	1.01482	0.962	0.703	0.000548985	chemotactic neutrophils	Mkrn1
Igfbp7	3.13649e-08	0.303315	0.192	0.024	0.000592922	chemotactic neutrophils	Igfbp7
Hist1h4h	4.76863e-08	0.498046	0.308	0.056	0.000901462	chemotactic neutrophils	Hist1h4h
Gpx4	7.14381e-08	1.66128	0.962	0.748	0.00135047	chemotactic neutrophils	Gpx4
Bicd2	8.09288e-08	0.271299	0.154	0.017	0.00152988	chemotactic neutrophils	Bicd2
Ptgs1	1.13658e-07	0.73316	0.308	0.062	0.00214858	chemotactic neutrophils	Ptgs1
Inafm2	1.24615e-07	1.0538	0.308	0.065	0.00235572	chemotactic neutrophils	Inafm2
Dusp3	1.40947e-07	0.349978	0.154	0.018	0.00266446	chemotactic neutrophils	Dusp3
Plek	1.61941e-07	0.872219	1	0.805	0.00306134	chemotactic neutrophils	Plek
Cyb5a	1.74879e-07	1.07463	0.538	0.193	0.00330592	chemotactic neutrophils	Cyb5a
Fbxl17	2.10126e-07	0.303686	0.154	0.018	0.00397222	chemotactic neutrophils	Fbxl17
Fundc2	2.13452e-07	0.261489	0.154	0.018	0.00403509	chemotactic neutrophils	Fundc2
F11r	2.13943e-07	0.319227	0.115	0.01	0.00404438	chemotactic neutrophils	F11r
Pcmt1	2.49495e-07	0.788828	0.577	0.23	0.00471645	chemotactic neutrophils	Pcmt1
Hist1h4i	3.3399e-07	1.13761	0.731	0.377	0.00631375	chemotactic neutrophils	Hist1h4i
Ndrg1	3.61181e-07	0.455613	0.346	0.079	0.00682777	chemotactic neutrophils	Ndrg1
2022-03-02	4.57052e-07	1.51278	0.615	0.286	0.00864011	chemotactic neutrophils	2022-03-02
Aldh2	4.70173e-07	1.29008	0.885	0.485	0.00888816	chemotactic neutrophils	Aldh2
Otud7b	4.93369e-07	0.820426	0.346	0.085	0.00932665	chemotactic neutrophils	Otud7b
Dhrs3	5.01174e-07	0.919892	0.462	0.139	0.00947419	chemotactic neutrophils	Dhrs3
Gsto1	7.05787e-07	0.395558	0.115	0.011	0.0133422	chemotactic neutrophils	Gsto1
Man1a	9.64201e-07	0.407938	0.192	0.03	0.0182273	chemotactic neutrophils	Man1a
Hist1h2bc	1.07271e-06	1.11406	1	0.694	0.0202785	chemotactic neutrophils	Hist1h2bc
Gm13431	1.40375e-06	0.265704	0.115	0.012	0.0265365	chemotactic neutrophils	Gm13431
Ccdc32	1.89383e-06	0.440653	0.231	0.043	0.035801	chemotactic neutrophils	Ccdc32
Slco2a1	2.28792e-06	0.410466	0.154	0.021	0.0432508	chemotactic neutrophils	Slco2a1
Ptger3	2.90268e-06	0.485707	0.154	0.021	0.0548723	chemotactic neutrophils	Ptger3
Itgb1	2.93637e-06	0.82094	0.5	0.177	0.0555092	chemotactic neutrophils	Itgb1
Tmem40	3.39496e-06	1.2307	0.577	0.262	0.0641784	chemotactic neutrophils	Tmem40
mt-Nd4	3.86431e-06	0.887075	1	0.812	0.0730509	chemotactic neutrophils	mt-Nd4
Gid4	4.97376e-06	0.331717	0.115	0.013	0.0940239	chemotactic neutrophils	Gid4
Jarid2	5.06052e-06	0.28701	0.308	0.074	0.0956641	chemotactic neutrophils	Jarid2
Sod1	5.48159e-06	0.310459	0.308	0.074	0.103624	chemotactic neutrophils	Sod1
Rgs18	5.67498e-06	1.18919	0.5	0.212	0.10728	chemotactic neutrophils	Rgs18
Nptn	7.11643e-06	0.79582	0.692	0.334	0.134529	chemotactic neutrophils	Nptn
Stk25	8.34196e-06	0.398633	0.192	0.034	0.157696	chemotactic neutrophils	Stk25
Ndufa4	9.75716e-06	0.812004	0.692	0.384	0.184449	chemotactic neutrophils	Ndufa4
Arhgap18	9.93328e-06	0.390994	0.346	0.095	0.187779	chemotactic neutrophils	Arhgap18
Dap	1.22817e-05	1.30267	0.769	0.493	0.232173	chemotactic neutrophils	Dap
Nudt3	1.23262e-05	0.792048	0.385	0.125	0.233014	chemotactic neutrophils	Nudt3
Cela1	1.24642e-05	0.592998	0.154	0.024	0.235624	chemotactic neutrophils	Cela1
Gatad1	1.3492e-05	0.759361	0.577	0.266	0.255052	chemotactic neutrophils	Gatad1
Fkbp1a	1.64888e-05	0.590874	0.269	0.067	0.311704	chemotactic neutrophils	Fkbp1a
P2ry1	1.69433e-05	0.32344	0.308	0.079	0.320297	chemotactic neutrophils	P2ry1
Fermt3	2.32329e-05	1.40321	0.731	0.476	0.439194	chemotactic neutrophils	Fermt3
Ywhah	5.13102e-05	1.3935	0.769	0.591	0.969968	chemotactic neutrophils	Ywhah
Hp1bp3	6.87526e-05	0.55416	0.538	0.233	1	chemotactic neutrophils	Hp1bp3
Zwint	7.20964e-05	0.385238	0.231	0.056	1	chemotactic neutrophils	Zwint
Creg1	7.59888e-05	1.06193	0.769	0.575	1	chemotactic neutrophils	Creg1
Myh9	7.87237e-05	0.779404	0.846	0.648	1	chemotactic neutrophils	Myh9
Ilk	7.97753e-05	0.986978	0.577	0.287	1	chemotactic neutrophils	Ilk
Atox1	8.32555e-05	0.557644	0.923	0.802	1	chemotactic neutrophils	Atox1
Rasa3	8.50642e-05	0.421203	0.731	0.357	1	chemotactic neutrophils	Rasa3
Arrb1	9.96199e-05	0.295817	0.231	0.057	1	chemotactic neutrophils	Arrb1
Eif5b	0.000102125	0.340549	0.385	0.132	1	chemotactic neutrophils	Eif5b
Wdfy1	0.000105189	0.45618	0.385	0.138	1	chemotactic neutrophils	Wdfy1
Tmem123	0.000111223	0.566868	0.308	0.095	1	chemotactic neutrophils	Tmem123
Ankrd28	0.000118457	0.324315	0.154	0.029	1	chemotactic neutrophils	Ankrd28
Clcn3	0.00013561	0.253204	0.231	0.056	1	chemotactic neutrophils	Clcn3
Fez2	0.000141275	0.408377	0.154	0.03	1	chemotactic neutrophils	Fez2
Gclm	0.00014966	0.945493	0.654	0.403	1	chemotactic neutrophils	Gclm
Pink1	0.000175482	0.486259	0.462	0.197	1	chemotactic neutrophils	Pink1
F5	0.000189493	0.8132	0.462	0.22	1	chemotactic neutrophils	F5
Smim3	0.000194525	1.11944	0.538	0.273	1	chemotactic neutrophils	Smim3
Zfand3	0.000194762	0.544922	0.692	0.4	1	chemotactic neutrophils	Zfand3
Stom	0.00020447	0.392801	0.231	0.061	1	chemotactic neutrophils	Stom
P2ry12	0.000214454	0.485524	0.269	0.082	1	chemotactic neutrophils	P2ry12
Ptprj	0.000217662	0.902956	0.385	0.154	1	chemotactic neutrophils	Ptprj
Ybx1	0.000220345	1.41182	0.769	0.557	1	chemotactic neutrophils	Ybx1
mt-Cytb	0.000231862	0.727667	0.962	0.898	1	chemotactic neutrophils	mt-Cytb
Gm34455	0.000232503	0.494443	0.346	0.114	1	chemotactic neutrophils	Gm34455
Selenow	0.000234609	0.353049	0.154	0.03	1	chemotactic neutrophils	Selenow
Ptpn18	0.000261913	0.76596	0.731	0.469	1	chemotactic neutrophils	Ptpn18
Casd1	0.000309059	0.390764	0.269	0.083	1	chemotactic neutrophils	Casd1
Triap1	0.000313431	0.505449	0.385	0.145	1	chemotactic neutrophils	Triap1
Hist1h1c	0.000333628	0.518105	0.923	0.639	1	chemotactic neutrophils	Hist1h1c
Ppia	0.000350041	0.828852	0.846	0.626	1	chemotactic neutrophils	Ppia
Sptbn1	0.000416929	0.769582	0.308	0.109	1	chemotactic neutrophils	Sptbn1
mt-Atp6	0.000431062	0.484176	1	0.989	1	chemotactic neutrophils	mt-Atp6
Ssbp4	0.000441038	0.651911	0.462	0.212	1	chemotactic neutrophils	Ssbp4
Esd	0.000442124	0.808758	0.769	0.5	1	chemotactic neutrophils	Esd
Aqp1	0.000449191	0.366295	0.115	0.02	1	chemotactic neutrophils	Aqp1
Arl5a	0.000463754	0.407275	0.231	0.066	1	chemotactic neutrophils	Arl5a
Golph3	0.000465036	0.413758	0.538	0.251	1	chemotactic neutrophils	Golph3
D430042O09Rik	0.000513855	0.278665	0.269	0.083	1	chemotactic neutrophils	D430042O09Rik
Camk1	0.00052311	0.370613	0.269	0.087	1	chemotactic neutrophils	Camk1
Plekha2	0.000621286	0.456594	0.269	0.09	1	chemotactic neutrophils	Plekha2
Ptpa	0.00067217	0.329298	0.231	0.068	1	chemotactic neutrophils	Ptpa
Ftl1	0.000699069	0.473649	1	0.997	1	chemotactic neutrophils	Ftl1
Tacc1	0.000777544	0.496902	0.538	0.311	1	chemotactic neutrophils	Tacc1
Rab12	0.00103728	0.292244	0.154	0.036	1	chemotactic neutrophils	Rab12
Mrpl34	0.00108261	0.489627	0.308	0.112	1	chemotactic neutrophils	Mrpl34
Yod1	0.00111416	0.312399	0.154	0.036	1	chemotactic neutrophils	Yod1
mt-Co3	0.00112017	0.431674	1	0.989	1	chemotactic neutrophils	mt-Co3
Rap1b	0.00116126	0.470934	0.962	0.925	1	chemotactic neutrophils	Rap1b
Rfwd3	0.00117377	0.38159	0.154	0.036	1	chemotactic neutrophils	Rfwd3
Sord	0.00122077	0.32011	0.231	0.072	1	chemotactic neutrophils	Sord
Wbp2	0.00124784	0.510008	0.577	0.393	1	chemotactic neutrophils	Wbp2
Tpm4	0.00125536	0.693749	0.808	0.675	1	chemotactic neutrophils	Tpm4
Prdx6	0.0013109	0.484309	0.615	0.354	1	chemotactic neutrophils	Prdx6
Slc2a3	0.00149917	0.377283	0.769	0.506	1	chemotactic neutrophils	Slc2a3
Epas1	0.00153435	0.252431	0.192	0.053	1	chemotactic neutrophils	Epas1
Serf2	0.00193284	0.40492	1	0.98	1	chemotactic neutrophils	Serf2
Crip1	0.00211118	0.256306	0.269	0.095	1	chemotactic neutrophils	Crip1
Fth1	0.00220638	0.49235	1	0.999	1	chemotactic neutrophils	Fth1
Derl1	0.00229057	0.593425	0.692	0.491	1	chemotactic neutrophils	Derl1
Ap2m1	0.00244793	0.605489	0.5	0.293	1	chemotactic neutrophils	Ap2m1
Tsn	0.00247103	0.312397	0.346	0.143	1	chemotactic neutrophils	Tsn
Taldo1	0.00251115	0.3972	0.962	0.976	1	chemotactic neutrophils	Taldo1
Nlrx1	0.00252687	0.318415	0.385	0.172	1	chemotactic neutrophils	Nlrx1
Smox	0.00275263	0.562403	0.615	0.389	1	chemotactic neutrophils	Smox
Actg1	0.00276032	0.447918	1	0.998	1	chemotactic neutrophils	Actg1
Isyna1	0.00284362	0.260521	0.154	0.04	1	chemotactic neutrophils	Isyna1
Cd84	0.00299282	0.298989	0.962	0.85	1	chemotactic neutrophils	Cd84
Tagln2	0.00322977	1.33827	0.654	0.461	1	chemotactic neutrophils	Tagln2
Usp48	0.00345733	0.250178	0.269	0.099	1	chemotactic neutrophils	Usp48
Rab22a	0.00355089	0.330545	0.346	0.153	1	chemotactic neutrophils	Rab22a
Blvrb	0.00358577	0.418827	0.385	0.19	1	chemotactic neutrophils	Blvrb
Smdt1	0.00382552	0.559814	0.692	0.496	1	chemotactic neutrophils	Smdt1
Ninj1	0.00406416	0.647923	0.615	0.408	1	chemotactic neutrophils	Ninj1
Zfp120	0.00428709	0.294005	0.192	0.062	1	chemotactic neutrophils	Zfp120
Vcl	0.00445912	0.516434	0.346	0.164	1	chemotactic neutrophils	Vcl
Mxi1	0.00452566	0.600276	0.615	0.406	1	chemotactic neutrophils	Mxi1
Dynll2	0.00479458	0.257695	0.115	0.027	1	chemotactic neutrophils	Dynll2
Capns1	0.00490127	0.567637	0.577	0.359	1	chemotactic neutrophils	Capns1
Specc1	0.00492865	0.256689	0.154	0.044	1	chemotactic neutrophils	Specc1
Psmd11	0.00493698	0.362939	0.462	0.25	1	chemotactic neutrophils	Psmd11
Cetn2	0.00513101	0.325911	0.269	0.111	1	chemotactic neutrophils	Cetn2
Camk1d	0.00514124	0.33996	0.423	0.215	1	chemotactic neutrophils	Camk1d
Ptp4a3	0.00514688	0.527585	0.154	0.044	1	chemotactic neutrophils	Ptp4a3
Mcur1	0.00522225	0.285608	0.346	0.156	1	chemotactic neutrophils	Mcur1
Psmd6	0.0054726	0.275097	0.346	0.163	1	chemotactic neutrophils	Psmd6
Tollip	0.0056535	0.362847	0.269	0.109	1	chemotactic neutrophils	Tollip
Dctn4	0.00578731	0.332595	0.462	0.244	1	chemotactic neutrophils	Dctn4
Rnf187	0.00595506	0.275968	0.308	0.129	1	chemotactic neutrophils	Rnf187
Gm42418	0.00631839	0.255627	1	1	1	chemotactic neutrophils	Gm42418
Nadk2	0.00638181	0.406822	0.231	0.088	1	chemotactic neutrophils	Nadk2
Mapk3	0.00654469	0.608257	0.615	0.498	1	chemotactic neutrophils	Mapk3
1110032A03Rik	0.00661002	0.336499	0.192	0.063	1	chemotactic neutrophils	1110032A03Rik
Rsu1	0.00681303	0.746343	0.577	0.395	1	chemotactic neutrophils	Rsu1
Gsn	0.0071001	0.700073	0.769	0.6	1	chemotactic neutrophils	Gsn
Mbtd1	0.00717956	0.275066	0.192	0.066	1	chemotactic neutrophils	Mbtd1
Mff	0.0080486	0.562058	0.654	0.456	1	chemotactic neutrophils	Mff
Hs1bp3	0.00821149	0.256688	0.115	0.029	1	chemotactic neutrophils	Hs1bp3
Stx8	0.00824693	0.257465	0.269	0.116	1	chemotactic neutrophils	Stx8
Mob1b	0.00855482	0.336923	0.308	0.139	1	chemotactic neutrophils	Mob1b
Sirt3	0.0086118	0.269344	0.192	0.066	1	chemotactic neutrophils	Sirt3
Sftpc	0.00914028	0.368661	0.385	0.194	1	chemotactic neutrophils	Sftpc
Tmem140	0.00919997	0.451166	0.385	0.194	1	chemotactic neutrophils	Tmem140
Bnip3l	0.00968058	0.628071	0.846	0.735	1	chemotactic neutrophils	Bnip3l
Isg15	0	1.75714	0.904	0.409	0	IFN-associated neutrophils	Isg15
Gbp2b	0	1.67929	0.767	0.251	0	IFN-associated neutrophils	Gbp2b
Gbp2	0	1.4516	0.761	0.24	0	IFN-associated neutrophils	Gbp2
Rtp4	0	1.27231	0.856	0.329	0	IFN-associated neutrophils	Rtp4
Ifi47	0	1.2641	0.47	0.056	0	IFN-associated neutrophils	Ifi47
Stat1	0	1.23605	0.763	0.358	0	IFN-associated neutrophils	Stat1
Igtp	0	1.18637	0.613	0.13	0	IFN-associated neutrophils	Igtp
Rsad2	0	1.11906	0.31	0.022	0	IFN-associated neutrophils	Rsad2
Gbp7	0	1.09324	0.62	0.179	0	IFN-associated neutrophils	Gbp7
Irf7	0	1.0182	0.68	0.279	0	IFN-associated neutrophils	Irf7
Zbp1	0	0.991735	0.513	0.137	0	IFN-associated neutrophils	Zbp1
Irgm1	0	0.981373	0.497	0.114	0	IFN-associated neutrophils	Irgm1
Cd274	0	0.917846	0.371	0.046	0	IFN-associated neutrophils	Cd274
Psmb9	2.68783e-281	0.859534	0.885	0.693	5.08107e-277	IFN-associated neutrophils	Psmb9
H2-D1	7.32499e-268	0.542743	1	0.999	1.38472e-263	IFN-associated neutrophils	H2-D1
B2m	2.65517e-265	0.716071	0.996	0.987	5.01933e-261	IFN-associated neutrophils	B2m
Psmb8	1.88592e-264	0.941602	0.833	0.608	3.56514e-260	IFN-associated neutrophils	Psmb8
Gbp3	1.03648e-260	0.570141	0.256	0.023	1.95935e-256	IFN-associated neutrophils	Gbp3
H2-T23	8.39268e-259	0.751251	0.91	0.757	1.58655e-254	IFN-associated neutrophils	H2-T23
Gbp5	2.87953e-245	0.707143	0.19	0.007	5.44347e-241	IFN-associated neutrophils	Gbp5
H2-K1	1.01456e-237	0.943466	0.882	0.658	1.91793e-233	IFN-associated neutrophils	H2-K1
Tap1	1.24679e-223	0.810634	0.601	0.27	2.35694e-219	IFN-associated neutrophils	Tap1
Samhd1	9.35083e-223	0.681926	0.957	0.893	1.76768e-218	IFN-associated neutrophils	Samhd1
Tnfaip2	6.44067e-222	0.807683	0.974	0.917	1.21754e-217	IFN-associated neutrophils	Tnfaip2
Plac8	1.29565e-221	1.19106	0.847	0.691	2.4493e-217	IFN-associated neutrophils	Plac8
Ifit1	5.74179e-210	0.91655	0.258	0.036	1.08543e-205	IFN-associated neutrophils	Ifit1
Acod1	1.44621e-207	1.02553	0.722	0.416	2.73392e-203	IFN-associated neutrophils	Acod1
Srgn	8.55385e-205	0.38494	1	0.998	1.61702e-200	IFN-associated neutrophils	Srgn
Irf1	7.5402e-198	1.04094	0.747	0.5	1.4254e-193	IFN-associated neutrophils	Irf1
Slfn5	3.52462e-197	0.922237	0.356	0.087	6.66294e-193	IFN-associated neutrophils	Slfn5
Oasl2	3.61582e-194	0.613255	0.302	0.059	6.83535e-190	IFN-associated neutrophils	Oasl2
Parp14	9.07058e-192	0.743833	0.452	0.155	1.7147e-187	IFN-associated neutrophils	Parp14
Oas3	1.76254e-186	0.695269	0.532	0.237	3.33191e-182	IFN-associated neutrophils	Oas3
Il1b	5.06908e-171	0.468609	1	0.967	9.58259e-167	IFN-associated neutrophils	Il1b
Dtx3l	2.81824e-164	0.668502	0.457	0.182	5.3276e-160	IFN-associated neutrophils	Dtx3l
Trim30a	1.7105e-157	0.658963	0.758	0.573	3.23353e-153	IFN-associated neutrophils	Trim30a
Herc6	1.75817e-156	0.44746	0.204	0.03	3.32364e-152	IFN-associated neutrophils	Herc6
Ifi27l2a	2.15389e-156	1.38843	0.52	0.236	4.07171e-152	IFN-associated neutrophils	Ifi27l2a
H2-Q4	1.58836e-149	0.663196	0.466	0.194	3.00264e-145	IFN-associated neutrophils	H2-Q4
Pim1	2.76482e-143	0.497462	0.967	0.944	5.22662e-139	IFN-associated neutrophils	Pim1
Zfp36	1.75918e-138	0.445034	0.996	0.982	3.32555e-134	IFN-associated neutrophils	Zfp36
Gm13822	4.08693e-137	0.694707	0.421	0.172	7.72593e-133	IFN-associated neutrophils	Gm13822
Oasl1	3.26263e-136	0.676212	0.429	0.178	6.16768e-132	IFN-associated neutrophils	Oasl1
Mxd1	2.34358e-132	0.412787	0.983	0.976	4.43031e-128	IFN-associated neutrophils	Mxd1
Dusp1	2.81787e-132	0.41025	0.994	0.983	5.32691e-128	IFN-associated neutrophils	Dusp1
Slfn8	6.4718e-130	0.393712	0.21	0.041	1.22343e-125	IFN-associated neutrophils	Slfn8
Usp18	5.78171e-125	0.3199	0.149	0.018	1.09298e-120	IFN-associated neutrophils	Usp18
Isg20	2.24861e-119	0.670486	0.49	0.259	4.25077e-115	IFN-associated neutrophils	Isg20
Xaf1	2.44162e-119	0.439963	0.22	0.051	4.61564e-115	IFN-associated neutrophils	Xaf1
Ctss	1.81959e-118	0.669595	0.512	0.274	3.43976e-114	IFN-associated neutrophils	Ctss
Slfn1	2.40031e-118	0.449963	0.932	0.878	4.53755e-114	IFN-associated neutrophils	Slfn1
Ltb	6.84471e-118	0.530932	0.967	0.939	1.29392e-113	IFN-associated neutrophils	Ltb
Junb	7.97805e-118	0.333475	0.999	0.998	1.50817e-113	IFN-associated neutrophils	Junb
Txn1	3.36854e-116	0.378327	0.994	0.98	6.36788e-112	IFN-associated neutrophils	Txn1
Slfn2	2.29684e-114	0.406834	0.97	0.945	4.34195e-110	IFN-associated neutrophils	Slfn2
Ifit3b	1.26725e-107	0.357592	0.108	0.009	2.3956e-103	IFN-associated neutrophils	Ifit3b
Irgm2	1.73499e-107	0.416906	0.251	0.072	3.27983e-103	IFN-associated neutrophils	Irgm2
Hdc	3.94472e-106	0.339515	0.983	0.969	7.45709e-102	IFN-associated neutrophils	Hdc
Csrnp1	5.87714e-106	0.568618	0.715	0.528	1.11101e-101	IFN-associated neutrophils	Csrnp1
Mcl1	1.87263e-104	0.271337	0.999	0.997	3.54002e-100	IFN-associated neutrophils	Mcl1
Stat2	2.68789e-104	0.439311	0.26	0.081	5.08119e-100	IFN-associated neutrophils	Stat2
Ly6e	7.34176e-104	0.719623	0.444	0.226	1.38789e-99	IFN-associated neutrophils	Ly6e
Epsti1	4.47605e-103	0.308203	0.174	0.035	8.46153e-99	IFN-associated neutrophils	Epsti1
Ccrl2	8.92078e-103	0.794269	0.711	0.497	1.68638e-98	IFN-associated neutrophils	Ccrl2
Fgl2	1.51059e-101	0.5285	0.853	0.695	2.85562e-97	IFN-associated neutrophils	Fgl2
Cebpb	1.33921e-99	0.31357	0.999	0.998	2.53164e-95	IFN-associated neutrophils	Cebpb
Btg2	9.09275e-99	0.350794	0.991	0.974	1.71889e-94	IFN-associated neutrophils	Btg2
Il18bp	1.41521e-98	0.48504	0.281	0.101	2.67532e-94	IFN-associated neutrophils	Il18bp
Trafd1	4.64963e-97	0.528473	0.377	0.18	8.78965e-93	IFN-associated neutrophils	Trafd1
Nfkbia	6.86228e-97	0.747085	0.789	0.66	1.29724e-92	IFN-associated neutrophils	Nfkbia
Ifitm3	4.32069e-94	0.411505	0.987	0.937	8.16783e-90	IFN-associated neutrophils	Ifitm3
Socs1	1.61303e-93	0.574933	0.183	0.043	3.04928e-89	IFN-associated neutrophils	Socs1
Ifih1	3.58427e-91	0.374669	0.207	0.057	6.77571e-87	IFN-associated neutrophils	Ifih1
Casp4	8.06883e-89	0.53736	0.702	0.584	1.52533e-84	IFN-associated neutrophils	Casp4
Lst1	7.76141e-88	0.351593	0.994	0.988	1.46722e-83	IFN-associated neutrophils	Lst1
Btg1	6.88471e-85	0.292884	0.999	0.994	1.30149e-80	IFN-associated neutrophils	Btg1
Gbp9	1.28972e-84	0.311205	0.148	0.03	2.43808e-80	IFN-associated neutrophils	Gbp9
Marcksl1	1.49271e-83	0.935375	0.62	0.45	2.82183e-79	IFN-associated neutrophils	Marcksl1
Tmem1401	7.66778e-83	0.458847	0.353	0.158	1.44952e-78	IFN-associated neutrophils	Tmem140
Marcks	1.6721e-82	0.355032	0.952	0.886	3.16093e-78	IFN-associated neutrophils	Marcks
Plek1	2.91711e-81	0.453487	0.844	0.797	5.51451e-77	IFN-associated neutrophils	Plek
Gm424181	7.66397e-81	0.257163	1	1	1.4488e-76	IFN-associated neutrophils	Gm42418
Ddx5	5.88927e-80	0.265619	0.993	0.993	1.11331e-75	IFN-associated neutrophils	Ddx5
Pnrc1	4.61133e-79	0.301392	0.959	0.935	8.71725e-75	IFN-associated neutrophils	Pnrc1
Cmpk2	8.3669e-79	0.349167	0.143	0.031	1.58168e-74	IFN-associated neutrophils	Cmpk2
Fos	2.88398e-78	0.318369	0.988	0.969	5.45187e-74	IFN-associated neutrophils	Fos
Psmb10	1.56723e-77	0.432936	0.251	0.095	2.96269e-73	IFN-associated neutrophils	Psmb10
Oas2	6.55236e-77	0.394582	0.306	0.135	1.23866e-72	IFN-associated neutrophils	Oas2
Steap4	1.73056e-75	0.408058	0.87	0.784	3.27146e-71	IFN-associated neutrophils	Steap4
Irf9	5.69035e-75	0.454024	0.458	0.279	1.0757e-70	IFN-associated neutrophils	Irf9
Ddx60	4.79199e-71	0.45044	0.287	0.128	9.05878e-67	IFN-associated neutrophils	Ddx60
Parp10	6.6084e-71	0.370653	0.272	0.116	1.24925e-66	IFN-associated neutrophils	Parp10
Sp100	3.28257e-70	0.471073	0.518	0.368	6.20536e-66	IFN-associated neutrophils	Sp100
Ptgs2	2.46427e-69	0.623609	0.529	0.327	4.65845e-65	IFN-associated neutrophils	Ptgs2
Clec4e	8.96028e-69	0.40999	0.925	0.911	1.69385e-64	IFN-associated neutrophils	Clec4e
Psme2	1.54104e-68	0.598865	0.479	0.342	2.91319e-64	IFN-associated neutrophils	Psme2
Sdcbp	2.28418e-68	0.331151	0.874	0.839	4.31802e-64	IFN-associated neutrophils	Sdcbp
Egr1	6.94067e-68	0.422267	0.86	0.74	1.31206e-63	IFN-associated neutrophils	Egr1
Ptprc	1.89406e-67	0.252944	0.991	0.988	3.58052e-63	IFN-associated neutrophils	Ptprc
Socs3	8.53012e-67	0.360572	0.921	0.866	1.61253e-62	IFN-associated neutrophils	Socs3
Sell	1.31489e-65	0.302753	0.904	0.879	2.48568e-61	IFN-associated neutrophils	Sell
Samd9l	1.40823e-64	0.556673	0.515	0.388	2.66211e-60	IFN-associated neutrophils	Samd9l
Slfn4	1.54607e-64	0.524327	0.694	0.595	2.92269e-60	IFN-associated neutrophils	Slfn4
Tspan13	1.83354e-64	0.333487	0.839	0.758	3.46612e-60	IFN-associated neutrophils	Tspan13
Ets2	1.97734e-64	0.391427	0.739	0.64	3.73797e-60	IFN-associated neutrophils	Ets2
AW011738	3.37984e-62	0.370911	0.352	0.178	6.38925e-58	IFN-associated neutrophils	AW011738
Cxcl2	1.16457e-60	0.648996	0.772	0.664	2.2015e-56	IFN-associated neutrophils	Cxcl2
Bst2	2.37523e-56	0.286565	0.155	0.048	4.49013e-52	IFN-associated neutrophils	Bst2
Tapbpl	8.14073e-56	0.268475	0.129	0.035	1.53892e-51	IFN-associated neutrophils	Tapbpl
Tapbp	1.03461e-55	0.42244	0.594	0.484	1.95583e-51	IFN-associated neutrophils	Tapbp
9930111J21Rik2	3.15553e-55	0.462849	0.468	0.325	5.96522e-51	IFN-associated neutrophils	9930111J21Rik2
Parp9	6.23807e-55	0.34817	0.294	0.151	1.17924e-50	IFN-associated neutrophils	Parp9
Trem1	9.7789e-55	0.337263	0.891	0.862	1.8486e-50	IFN-associated neutrophils	Trem1
Irf2	1.25807e-52	0.338363	0.738	0.692	2.37825e-48	IFN-associated neutrophils	Irf2
Trib1	7.73239e-52	0.337478	0.766	0.704	1.46173e-47	IFN-associated neutrophils	Trib1
Smchd1	1.21227e-51	0.383716	0.353	0.205	2.29168e-47	IFN-associated neutrophils	Smchd1
Clec4d	8.8533e-50	0.314279	0.817	0.756	1.67363e-45	IFN-associated neutrophils	Clec4d
Fcgr4	3.51064e-49	0.421415	0.661	0.599	6.63652e-45	IFN-associated neutrophils	Fcgr4
Egr3	3.60451e-48	0.433697	0.367	0.208	6.81396e-44	IFN-associated neutrophils	Egr3
Ppp1r15a	7.89828e-48	0.376396	0.652	0.491	1.49309e-43	IFN-associated neutrophils	Ppp1r15a
Gadd45b	9.94001e-47	0.641813	0.472	0.33	1.87906e-42	IFN-associated neutrophils	Gadd45b
Plgrkt	1.12609e-45	0.333424	0.203	0.09	2.12877e-41	IFN-associated neutrophils	Plgrkt
Nmi	2.93484e-45	0.364926	0.318	0.189	5.54802e-41	IFN-associated neutrophils	Nmi
Snx20	6.56621e-45	0.301204	0.78	0.751	1.24128e-40	IFN-associated neutrophils	Snx20
Rnf213	1.36968e-44	0.272132	0.175	0.071	2.58924e-40	IFN-associated neutrophils	Rnf213
Pde4b	1.89247e-44	0.392505	0.388	0.244	3.57752e-40	IFN-associated neutrophils	Pde4b
Slc15a3	4.30974e-44	0.372628	0.539	0.433	8.14714e-40	IFN-associated neutrophils	Slc15a3
Ddx58	9.40927e-44	0.358763	0.271	0.149	1.77873e-39	IFN-associated neutrophils	Ddx58
Tmbim6	9.97477e-44	0.265298	0.894	0.899	1.88563e-39	IFN-associated neutrophils	Tmbim6
Fas	2.70894e-43	0.402268	0.452	0.318	5.12098e-39	IFN-associated neutrophils	Fas
Samsn1	1.37218e-42	0.385626	0.719	0.676	2.59397e-38	IFN-associated neutrophils	Samsn1
Hcar2	2.95069e-41	0.505587	0.371	0.239	5.57799e-37	IFN-associated neutrophils	Hcar2
Ubc	8.43817e-41	0.28609	0.801	0.776	1.59515e-36	IFN-associated neutrophils	Ubc
Clec4a3	1.20267e-40	0.372184	0.25	0.125	2.27353e-36	IFN-associated neutrophils	Clec4a3
Tnfrsf1a	3.58958e-40	0.29362	0.773	0.76	6.78574e-36	IFN-associated neutrophils	Tnfrsf1a
Zfand5	4.30627e-40	0.351454	0.774	0.742	8.14056e-36	IFN-associated neutrophils	Zfand5
Clk1	9.20229e-40	0.264834	0.801	0.79	1.7396e-35	IFN-associated neutrophils	Clk1
Casp1	5.33963e-39	0.37782	0.412	0.309	1.0094e-34	IFN-associated neutrophils	Casp1
Lmnb1	2.30687e-38	0.276955	0.801	0.787	4.3609e-34	IFN-associated neutrophils	Lmnb1
Rnf19b	3.34188e-38	0.436463	0.386	0.277	6.31749e-34	IFN-associated neutrophils	Rnf19b
Fam174a	3.56256e-38	0.333659	0.612	0.53	6.73466e-34	IFN-associated neutrophils	Fam174a
Cytip	4.09051e-38	0.251417	0.862	0.859	7.7327e-34	IFN-associated neutrophils	Cytip
Rnf114	4.13507e-38	0.351851	0.417	0.302	7.81694e-34	IFN-associated neutrophils	Rnf114
Tap2	1.40218e-37	0.432958	0.434	0.338	2.65068e-33	IFN-associated neutrophils	Tap2
Fbxl5	1.55266e-36	0.300074	0.823	0.817	2.93514e-32	IFN-associated neutrophils	Fbxl5
Jaml	5.74769e-36	0.335881	0.675	0.581	1.08654e-31	IFN-associated neutrophils	Jaml
1600014C10Rik	7.63316e-36	0.38225	0.544	0.474	1.44297e-31	IFN-associated neutrophils	1600014C10Rik
Themis2	1.82554e-35	0.282033	0.68	0.634	3.451e-31	IFN-associated neutrophils	Themis2
Upp1	5.47129e-35	0.441089	0.705	0.664	1.03429e-30	IFN-associated neutrophils	Upp1
Il1rn	6.62464e-35	0.399543	0.407	0.294	1.25232e-30	IFN-associated neutrophils	Il1rn
Syk	1.00407e-34	0.252363	0.748	0.706	1.89809e-30	IFN-associated neutrophils	Syk
Mitd1	1.01076e-34	0.280369	0.171	0.078	1.91073e-30	IFN-associated neutrophils	Mitd1
Ifi35	3.78776e-34	0.335019	0.242	0.139	7.16039e-30	IFN-associated neutrophils	Ifi35
Hck	4.96732e-34	0.291849	0.793	0.776	9.39022e-30	IFN-associated neutrophils	Hck
Il1f9	1.13912e-33	0.373201	0.705	0.669	2.15339e-29	IFN-associated neutrophils	Il1f9
Sftpc1	8.80917e-33	0.295957	0.287	0.173	1.66528e-28	IFN-associated neutrophils	Sftpc
Trim12c	1.23563e-31	0.339824	0.556	0.493	2.33584e-27	IFN-associated neutrophils	Trim12c
Csf1	6.55967e-31	0.345144	0.399	0.268	1.24004e-26	IFN-associated neutrophils	Csf1
Myd88	6.84282e-31	0.260341	0.745	0.737	1.29357e-26	IFN-associated neutrophils	Myd88
Scimp	7.8507e-31	0.303317	0.185	0.089	1.4841e-26	IFN-associated neutrophils	Scimp
Psme1	1.37232e-30	0.395036	0.514	0.467	2.59423e-26	IFN-associated neutrophils	Psme1
Clec2d	3.47616e-29	0.376545	0.458	0.365	6.57133e-25	IFN-associated neutrophils	Clec2d
Prr5l	4.70093e-29	0.264002	0.485	0.379	8.88663e-25	IFN-associated neutrophils	Prr5l
Vmp1	8.50987e-29	0.27165	0.728	0.697	1.60871e-24	IFN-associated neutrophils	Vmp1
Smox1	2.25044e-28	0.311929	0.46	0.373	4.25423e-24	IFN-associated neutrophils	Smox
Resf1	1.29483e-27	0.266268	0.792	0.779	2.44774e-23	IFN-associated neutrophils	Resf1
Ptafr	4.28881e-27	0.363646	0.53	0.462	8.10757e-23	IFN-associated neutrophils	Ptafr
Oser1	8.86015e-27	0.264869	0.675	0.64	1.67492e-22	IFN-associated neutrophils	Oser1
Taf7	1.90407e-26	0.300874	0.454	0.372	3.59945e-22	IFN-associated neutrophils	Taf7
Igsf6	8.95863e-26	0.252885	0.75	0.762	1.69354e-21	IFN-associated neutrophils	Igsf6
2310001H17Rik	1.21992e-25	0.266836	0.675	0.639	2.30614e-21	IFN-associated neutrophils	2310001H17Rik
Kpna4	1.73449e-25	0.261893	0.54	0.455	3.27887e-21	IFN-associated neutrophils	Kpna4
Fosl2	3.55341e-25	0.252076	0.653	0.627	6.71736e-21	IFN-associated neutrophils	Fosl2
Tnfaip3	1.42508e-24	0.298224	0.192	0.105	2.69397e-20	IFN-associated neutrophils	Tnfaip3
Icam1	1.42748e-24	0.277477	0.107	0.044	2.69851e-20	IFN-associated neutrophils	Icam1
Nfkbiz	3.2959e-24	0.358752	0.621	0.59	6.23057e-20	IFN-associated neutrophils	Nfkbiz
Susd6	8.51797e-24	0.292092	0.548	0.512	1.61024e-19	IFN-associated neutrophils	Susd6
Il1r2	1.52706e-21	0.26875	0.604	0.569	2.88676e-17	IFN-associated neutrophils	Il1r2
Rnase6	9.23073e-21	0.296131	0.18	0.104	1.74498e-16	IFN-associated neutrophils	Rnase6
Ier3	3.04078e-20	0.411488	0.653	0.632	5.74829e-16	IFN-associated neutrophils	Ier3
Nfkbid	8.60949e-20	0.33522	0.337	0.254	1.62754e-15	IFN-associated neutrophils	Nfkbid
Gsap	1.54263e-19	0.266057	0.303	0.227	2.91618e-15	IFN-associated neutrophils	Gsap
Nampt	1.67918e-19	0.326387	0.301	0.233	3.17433e-15	IFN-associated neutrophils	Nampt
Plekho2	9.86738e-19	0.255484	0.483	0.427	1.86533e-14	IFN-associated neutrophils	Plekho2
Pmaip1	1.91793e-18	0.261078	0.271	0.18	3.62566e-14	IFN-associated neutrophils	Pmaip1
Plk3	1.40787e-17	0.273653	0.393	0.327	2.66144e-13	IFN-associated neutrophils	Plk3
Dusp2	2.08712e-17	0.27084	0.12	0.06	3.9455e-13	IFN-associated neutrophils	Dusp2
Slc7a11	8.56783e-17	0.262996	0.305	0.229	1.61966e-12	IFN-associated neutrophils	Slc7a11
Ifi27	2.44032e-16	0.324953	0.357	0.295	4.61318e-12	IFN-associated neutrophils	Ifi27
Birc3	3.12706e-16	0.319134	0.4	0.347	5.9114e-12	IFN-associated neutrophils	Birc3
Slc31a1	1.14138e-15	0.2735	0.222	0.159	2.15767e-11	IFN-associated neutrophils	Slc31a1
Ogfr	3.26356e-15	0.252585	0.28	0.219	6.16942e-11	IFN-associated neutrophils	Ogfr
Bcl2a1b	5.37554e-15	0.272562	0.141	0.082	1.01619e-10	IFN-associated neutrophils	Bcl2a1b
Tor1aip1	6.31037e-14	0.278327	0.436	0.41	1.19291e-09	IFN-associated neutrophils	Tor1aip1
Sppl2a	9.68787e-13	0.272103	0.309	0.26	1.83139e-08	IFN-associated neutrophils	Sppl2a
Nr4a1	2.03232e-11	0.338142	0.425	0.379	3.84189e-07	IFN-associated neutrophils	Nr4a1
Ninj11	5.68998e-11	0.360659	0.443	0.4	1.07563e-06	IFN-associated neutrophils	Ninj1
Dusp5	6.41252e-11	0.264752	0.542	0.514	1.21222e-06	IFN-associated neutrophils	Dusp5
Cks2	5.18198e-10	0.382682	0.323	0.267	9.79601e-06	IFN-associated neutrophils	Cks2
Mapkapk2	6.71109e-10	0.302855	0.42	0.414	1.26866e-05	IFN-associated neutrophils	Mapkapk2
Ehd1	0.000102784	0.303637	0.474	0.518	1	IFN-associated neutrophils	Ehd1
Sod2	0.000417253	0.527777	0.28	0.275	1	IFN-associated neutrophils	Sod2
Hist1h2bc1	0	1.00663	0.851	0.634	0	mature neutrophils	Hist1h2bc
Igfbp6	0	0.749782	0.931	0.775	0	mature neutrophils	Igfbp6
Rps27	0	0.660354	0.995	0.994	0	mature neutrophils	Rps27
Il1b1	0	0.650413	1	0.963	0	mature neutrophils	Il1b
Lst11	0	0.580669	0.989	0.989	0	mature neutrophils	Lst1
Rpl18a	0	0.580116	0.971	0.966	0	mature neutrophils	Rpl18a
Btg11	0	0.578788	0.999	0.993	0	mature neutrophils	Btg1
Junb1	0	0.554315	1	0.998	0	mature neutrophils	Junb
Fau	0	0.539456	0.998	0.998	0	mature neutrophils	Fau
Rpl41	1.46608e-307	0.46594	0.987	0.991	2.77148e-303	mature neutrophils	Rpl41
Fxyd5	2.92244e-297	0.491833	0.994	0.99	5.52457e-293	mature neutrophils	Fxyd5
Cst3	4.0437e-297	0.585368	0.966	0.978	7.64422e-293	mature neutrophils	Cst3
Gm2a	7.10252e-296	0.774833	0.849	0.657	1.34266e-291	mature neutrophils	Gm2a
Txnip	1.6959e-286	0.660137	0.966	0.942	3.20593e-282	mature neutrophils	Txnip
Rabac1	1.27443e-284	0.641809	0.884	0.855	2.40918e-280	mature neutrophils	Rabac1
Malat1	2.04997e-279	0.433675	1	0.999	3.87526e-275	mature neutrophils	Malat1
Cd300c2	2.75001e-270	0.79674	0.804	0.605	5.19861e-266	mature neutrophils	Cd300c2
Tpt1	3.73302e-268	0.341691	0.996	0.998	7.0569e-264	mature neutrophils	Tpt1
Ptma	2.29551e-249	0.826982	0.79	0.604	4.33944e-245	mature neutrophils	Ptma
Ftl11	6.92515e-249	0.384228	0.996	0.997	1.30913e-244	mature neutrophils	Ftl1
Fgl21	1.83097e-243	0.636823	0.854	0.674	3.46127e-239	mature neutrophils	Fgl2
Rpl30	3.96907e-239	0.534805	0.921	0.938	7.50314e-235	mature neutrophils	Rpl30
Rpl27a	3.41515e-237	0.531462	0.935	0.933	6.456e-233	mature neutrophils	Rpl27a
Cxcr4	9.61773e-237	0.932062	0.662	0.397	1.81814e-232	mature neutrophils	Cxcr4
Jund	1.62908e-236	0.5156	0.975	0.972	3.07961e-232	mature neutrophils	Jund
Srsf5	1.28809e-234	0.498972	0.931	0.946	2.43501e-230	mature neutrophils	Srsf5
Ppp1r15a1	6.97308e-226	0.855288	0.712	0.447	1.31819e-221	mature neutrophils	Ppp1r15a
Ptprc1	1.60586e-225	0.446171	0.986	0.99	3.03572e-221	mature neutrophils	Ptprc
Cox8a	9.97554e-221	0.430809	0.957	0.973	1.88578e-216	mature neutrophils	Cox8a
Zfp361	7.07792e-215	0.51133	0.984	0.985	1.33801e-210	mature neutrophils	Zfp36
Csf3r	7.34293e-212	0.395522	0.996	0.99	1.38811e-207	mature neutrophils	Csf3r
Rps23	3.14239e-201	0.455058	0.946	0.959	5.94038e-197	mature neutrophils	Rps23
Eif1	5.53443e-201	0.313633	0.997	0.997	1.04623e-196	mature neutrophils	Eif1
Map1lc3b	1.18422e-198	0.381571	0.985	0.992	2.23865e-194	mature neutrophils	Map1lc3b
Rpl39	1.84077e-197	0.518578	0.923	0.919	3.47979e-193	mature neutrophils	Rpl39
Ddx51	4.62192e-197	0.380181	0.989	0.994	8.73727e-193	mature neutrophils	Ddx5
Neat1	1.50403e-196	0.549336	0.955	0.964	2.84322e-192	mature neutrophils	Neat1
Rpl17	7.41498e-196	0.470386	0.946	0.955	1.40173e-191	mature neutrophils	Rpl17
Gm5150	2.25474e-194	0.522771	0.905	0.814	4.26235e-190	mature neutrophils	Gm5150
Ccrl21	3.00907e-192	0.81914	0.73	0.461	5.68835e-188	mature neutrophils	Ccrl2
Gng5	1.40513e-191	0.345268	0.978	0.988	2.65625e-187	mature neutrophils	Gng5
Klf6	4.14691e-191	0.643663	0.891	0.884	7.83931e-187	mature neutrophils	Klf6
B2m1	3.39797e-187	0.33647	0.984	0.99	6.42352e-183	mature neutrophils	B2m
Ier2	6.06669e-185	0.500762	0.969	0.983	1.14685e-180	mature neutrophils	Ier2
2410006H16Rik	1.05208e-183	0.725854	0.748	0.653	1.98885e-179	mature neutrophils	2410006H16Rik
Dusp12	3.98425e-183	0.469876	0.988	0.984	7.53182e-179	mature neutrophils	Dusp1
Ier5	3.09442e-182	0.50886	0.913	0.902	5.8497e-178	mature neutrophils	Ier5
Hnrnpf	1.20099e-179	0.513083	0.838	0.83	2.27035e-175	mature neutrophils	Hnrnpf
H3f3b	1.34772e-179	0.543773	0.991	0.995	2.54774e-175	mature neutrophils	H3f3b
Rps16	9.95725e-179	0.379528	0.97	0.978	1.88232e-174	mature neutrophils	Rps16
Rps10	4.31745e-176	0.405064	0.951	0.964	8.1617e-172	mature neutrophils	Rps10
Cd841	5.53601e-175	0.6004	0.859	0.846	1.04653e-170	mature neutrophils	Cd84
Pfdn5	6.59602e-174	0.417513	0.908	0.935	1.24691e-169	mature neutrophils	Pfdn5
Bri3	1.95831e-172	0.57069	0.758	0.685	3.70199e-168	mature neutrophils	Bri3
Klf2	1.26346e-170	0.601219	0.98	0.985	2.38845e-166	mature neutrophils	Klf2
Metrnl	4.53133e-170	0.631915	0.729	0.598	8.56603e-166	mature neutrophils	Metrnl
Rpl23	6.6053e-170	0.450253	0.93	0.941	1.24867e-165	mature neutrophils	Rpl23
Rpl8	6.13935e-167	0.538065	0.81	0.79	1.16058e-162	mature neutrophils	Rpl8
Gabarap	4.90011e-166	0.299203	0.982	0.993	9.26316e-162	mature neutrophils	Gabarap
Fcer1g	2.83146e-164	0.266413	0.998	0.999	5.35259e-160	mature neutrophils	Fcer1g
Rpl21	2.60798e-163	0.516527	0.821	0.813	4.93012e-159	mature neutrophils	Rpl21
Rpl18	1.32129e-161	0.514653	0.825	0.806	2.49777e-157	mature neutrophils	Rpl18
Pnrc11	5.28701e-161	0.463076	0.92	0.946	9.99457e-157	mature neutrophils	Pnrc1
Rps14	6.0671e-161	0.441567	0.906	0.913	1.14693e-156	mature neutrophils	Rps14
Rps13	4.81226e-160	0.439103	0.903	0.925	9.0971e-156	mature neutrophils	Rps13
Gcnt2	8.03181e-160	0.481743	0.868	0.846	1.51833e-155	mature neutrophils	Gcnt2
Brk1	1.39291e-158	0.439946	0.843	0.878	2.63315e-154	mature neutrophils	Brk1
Rpl27	1.67977e-158	0.480543	0.865	0.879	3.17544e-154	mature neutrophils	Rpl27
Rplp2	1.45197e-154	0.499617	0.863	0.832	2.7448e-150	mature neutrophils	Rplp2
Elob	2.0065e-154	0.408961	0.902	0.937	3.79309e-150	mature neutrophils	Elob
Cebpd	1.28914e-153	0.427448	0.96	0.976	2.43699e-149	mature neutrophils	Cebpd
Adgre5	4.70716e-153	0.534193	0.839	0.814	8.89841e-149	mature neutrophils	Adgre5
Rplp1	1.16231e-152	0.490729	0.88	0.859	2.19723e-148	mature neutrophils	Rplp1
Tnfaip21	2.18859e-149	0.418473	0.926	0.928	4.13732e-145	mature neutrophils	Tnfaip2
Rps3a1	5.00682e-148	0.49178	0.857	0.864	9.46489e-144	mature neutrophils	Rps3a1
Rps29	6.1607e-146	0.343079	0.992	0.992	1.16462e-141	mature neutrophils	Rps29
Tpd52	8.72291e-143	0.345381	0.969	0.975	1.64898e-138	mature neutrophils	Tpd52
Rpl38	1.45762e-142	0.4647	0.862	0.883	2.75549e-138	mature neutrophils	Rpl38
Son	7.3718e-140	0.439475	0.86	0.893	1.39357e-135	mature neutrophils	Son
Fos1	9.23359e-139	0.469191	0.969	0.974	1.74552e-134	mature neutrophils	Fos
Rps21	5.18006e-138	0.412047	0.915	0.929	9.79238e-134	mature neutrophils	Rps21
Pim11	1.26344e-137	0.462024	0.936	0.953	2.38841e-133	mature neutrophils	Pim1
Rps3	5.46591e-137	0.390039	0.915	0.928	1.03327e-132	mature neutrophils	Rps3
Pnpla2	5.78462e-131	0.583824	0.636	0.494	1.09352e-126	mature neutrophils	Pnpla2
Cdk2ap2	1.45298e-129	0.896491	0.825	0.827	2.74672e-125	mature neutrophils	Cdk2ap2
Rpl36	1.17663e-125	0.557853	0.711	0.684	2.2243e-121	mature neutrophils	Rpl36
Btg21	2.02128e-125	0.433647	0.967	0.981	3.82104e-121	mature neutrophils	Btg2
Srgn1	2.52258e-125	0.258059	1	0.998	4.76868e-121	mature neutrophils	Srgn
Rpl9	2.21405e-124	0.348017	0.948	0.962	4.18544e-120	mature neutrophils	Rpl9
Atf3	1.64923e-123	0.791093	0.487	0.272	3.11771e-119	mature neutrophils	Atf3
Calm2	7.25271e-123	0.410094	0.872	0.911	1.37105e-118	mature neutrophils	Calm2
Rbm39	2.84402e-122	0.426537	0.835	0.872	5.37633e-118	mature neutrophils	Rbm39
Marcks1	1.09781e-121	0.428608	0.902	0.897	2.07529e-117	mature neutrophils	Marcks
Pmaip11	9.25247e-121	0.556887	0.342	0.14	1.74909e-116	mature neutrophils	Pmaip1
Eif5a	7.03666e-120	0.462258	0.754	0.757	1.33021e-115	mature neutrophils	Eif5a
Ssu72	2.54956e-119	0.399461	0.82	0.862	4.81968e-115	mature neutrophils	Ssu72
Atp6v0e	3.92848e-119	0.374025	0.877	0.914	7.4264e-115	mature neutrophils	Atp6v0e
Hspa5	8.31877e-119	0.560103	0.638	0.532	1.57258e-114	mature neutrophils	Hspa5
Hmgb1	7.0513e-118	0.463407	0.79	0.796	1.33298e-113	mature neutrophils	Hmgb1
Gngt2	1.70082e-116	0.65456	0.445	0.249	3.21522e-112	mature neutrophils	Gngt2
Dazap2	8.32815e-116	0.40355	0.825	0.858	1.57435e-111	mature neutrophils	Dazap2
Resf11	9.07718e-115	0.595037	0.787	0.779	1.71595e-110	mature neutrophils	Resf1
Rps28	3.47003e-114	0.538979	0.731	0.699	6.55975e-110	mature neutrophils	Rps28
Arpp19	2.71784e-111	0.493298	0.674	0.658	5.13781e-107	mature neutrophils	Arpp19
Rbm3	1.13635e-109	0.489475	0.726	0.731	2.14816e-105	mature neutrophils	Rbm3
Ninj12	1.50297e-106	0.506523	0.53	0.361	2.84121e-102	mature neutrophils	Ninj1
Cd300a	1.84659e-106	0.548371	0.632	0.558	3.49079e-102	mature neutrophils	Cd300a
Rpl13a	2.22336e-103	0.456312	0.732	0.747	4.20304e-99	mature neutrophils	Rpl13a
Rhoa	2.82477e-103	0.315386	0.928	0.958	5.33994e-99	mature neutrophils	Rhoa
Ost4	7.6983e-103	0.416604	0.761	0.804	1.45529e-98	mature neutrophils	Ost4
Tmem59	7.78147e-103	0.40746	0.771	0.812	1.47101e-98	mature neutrophils	Tmem59
Tsc22d3	5.51006e-102	0.532423	0.761	0.753	1.04162e-97	mature neutrophils	Tsc22d3
Ppia1	6.92634e-102	0.555113	0.662	0.613	1.30936e-97	mature neutrophils	Ppia
Hist1h4i1	7.41319e-101	0.911079	0.486	0.336	1.40139e-96	mature neutrophils	Hist1h4i
Cox6b1	6.62309e-100	0.365675	0.787	0.841	1.25203e-95	mature neutrophils	Cox6b1
2310001H17Rik1	4.1386e-98	0.497156	0.68	0.633	7.82361e-94	mature neutrophils	2310001H17Rik
Ctsb	4.24966e-98	0.490387	0.736	0.743	8.03355e-94	mature neutrophils	Ctsb
Laptm5	4.75677e-98	0.369773	0.844	0.896	8.99219e-94	mature neutrophils	Laptm5
Ifngr1	1.10012e-97	0.413444	0.83	0.851	2.07967e-93	mature neutrophils	Ifngr1
Csf11	1.24711e-97	0.624191	0.426	0.241	2.35754e-93	mature neutrophils	Csf1
Socs31	1.27715e-97	0.425764	0.891	0.871	2.41433e-93	mature neutrophils	Socs3
Rpl10	6.19993e-96	0.391727	0.812	0.834	1.17204e-91	mature neutrophils	Rpl10
Hist1h1c1	3.60954e-95	0.89717	0.677	0.625	6.82348e-91	mature neutrophils	Hist1h1c
H2afj	6.79256e-94	0.374451	0.872	0.921	1.28407e-89	mature neutrophils	H2afj
Btf3	3.91375e-93	0.39093	0.745	0.793	7.39854e-89	mature neutrophils	Btf3
Rps8	7.5408e-93	0.465833	0.774	0.769	1.42551e-88	mature neutrophils	Rps8
Pla2g7	2.19503e-92	0.350592	0.89	0.868	4.14948e-88	mature neutrophils	Pla2g7
Egr11	8.34795e-92	0.575709	0.787	0.752	1.5781e-87	mature neutrophils	Egr1
Atox11	3.7575e-90	0.392654	0.767	0.816	7.10318e-86	mature neutrophils	Atox1
Ypel3	8.5791e-90	0.292729	0.911	0.949	1.62179e-85	mature neutrophils	Ypel3
Vamp8	9.66778e-90	0.32486	0.843	0.906	1.8276e-85	mature neutrophils	Vamp8
Rpl11	2.11126e-89	0.422074	0.762	0.792	3.99113e-85	mature neutrophils	Rpl11
Itga4	3.30582e-88	0.513697	0.595	0.488	6.24933e-84	mature neutrophils	Itga4
Nudt4	6.50801e-88	0.386008	0.808	0.849	1.23027e-83	mature neutrophils	Nudt4
Syf2	3.22866e-87	0.372144	0.747	0.799	6.10346e-83	mature neutrophils	Syf2
D8Ertd738e	8.69988e-87	0.388651	0.773	0.829	1.64463e-82	mature neutrophils	D8Ertd738e
Rps27l	1.19608e-86	0.59	0.436	0.297	2.26108e-82	mature neutrophils	Rps27l
Zfp36l2	1.45126e-86	0.453909	0.822	0.811	2.74347e-82	mature neutrophils	Zfp36l2
Ctsa	5.18156e-86	0.45473	0.652	0.603	9.79522e-82	mature neutrophils	Ctsa
Rhob	6.10253e-86	0.699729	0.517	0.396	1.15362e-81	mature neutrophils	Rhob
Ssh2	1.25406e-85	0.424578	0.735	0.744	2.37067e-81	mature neutrophils	Ssh2
Fam104a	1.44928e-84	0.469515	0.639	0.63	2.73972e-80	mature neutrophils	Fam104a
Fth11	1.53297e-84	0.298957	0.999	0.999	2.89793e-80	mature neutrophils	Fth1
Saa3	2.50851e-84	1.25458	0.426	0.246	4.74208e-80	mature neutrophils	Saa3
Ube2b	2.74435e-84	0.293074	0.875	0.935	5.18792e-80	mature neutrophils	Ube2b
Msn	5.97941e-84	0.33016	0.879	0.937	1.13035e-79	mature neutrophils	Msn
Rsrp1	6.84765e-84	0.306954	0.933	0.962	1.29448e-79	mature neutrophils	Rsrp1
Cytip1	9.61224e-84	0.327984	0.826	0.872	1.8171e-79	mature neutrophils	Cytip
Rps26	1.89509e-83	0.450479	0.705	0.726	3.58247e-79	mature neutrophils	Rps26
Atp5e	2.31162e-83	0.343722	0.825	0.872	4.36988e-79	mature neutrophils	Atp5e
Fam32a	3.86228e-83	0.316073	0.873	0.933	7.30126e-79	mature neutrophils	Fam32a
Rps11	7.86131e-83	0.339935	0.859	0.9	1.4861e-78	mature neutrophils	Rps11
Rnf149	1.64219e-82	0.417475	0.731	0.731	3.1044e-78	mature neutrophils	Rnf149
Nfam1	2.03951e-82	0.318507	0.861	0.924	3.85549e-78	mature neutrophils	Nfam1
Sorl1	7.22496e-82	0.315637	0.91	0.947	1.36581e-77	mature neutrophils	Sorl1
Cebpb1	2.68221e-81	0.263962	0.998	0.999	5.07045e-77	mature neutrophils	Cebpb
Mrps24	1.94691e-80	0.511519	0.51	0.419	3.68044e-76	mature neutrophils	Mrps24
Emb	3.01349e-80	0.354481	0.852	0.903	5.69671e-76	mature neutrophils	Emb
2022-03-07	3.85207e-80	0.403493	0.749	0.784	7.28196e-76	mature neutrophils	2022-03-07
Rpl24	1.31302e-79	0.389048	0.784	0.837	2.48214e-75	mature neutrophils	Rpl24
Fus	1.63254e-79	0.537087	0.535	0.45	3.08616e-75	mature neutrophils	Fus
Atp5l	2.27395e-79	0.292942	0.884	0.939	4.29868e-75	mature neutrophils	Atp5l
Rps7	1.78955e-78	0.354327	0.821	0.866	3.38297e-74	mature neutrophils	Rps7
Srp14	1.74274e-77	0.417545	0.641	0.666	3.29447e-73	mature neutrophils	Srp14
Clk11	5.26645e-77	0.370252	0.769	0.801	9.9557e-73	mature neutrophils	Clk1
Rps25	2.02876e-76	0.342436	0.835	0.883	3.83516e-72	mature neutrophils	Rps25
Hnrnpc	5.526e-75	0.433887	0.65	0.631	1.04463e-70	mature neutrophils	Hnrnpc
Cnbp	9.75724e-75	0.519727	0.458	0.346	1.84451e-70	mature neutrophils	Cnbp
Neurl3	1.96908e-74	0.552257	0.49	0.375	3.72236e-70	mature neutrophils	Neurl3
Mif	4.90195e-74	0.519226	0.494	0.35	9.26664e-70	mature neutrophils	Mif
Gm50022	8.72512e-74	0.441122	0.747	0.742	1.6494e-69	mature neutrophils	Gm50022
Picalm	1.2005e-73	0.318316	0.887	0.935	2.26943e-69	mature neutrophils	Picalm
Oser11	2.02077e-73	0.463547	0.662	0.64	3.82005e-69	mature neutrophils	Oser1
Rps6	2.12004e-73	0.406186	0.674	0.686	4.00772e-69	mature neutrophils	Rps6
Slc40a1	7.97842e-73	0.407146	0.728	0.76	1.50824e-68	mature neutrophils	Slc40a1
Ccr1	4.05037e-72	0.290769	0.923	0.964	7.65683e-68	mature neutrophils	Ccr1
Klf13	1.23567e-71	0.351258	0.835	0.899	2.33591e-67	mature neutrophils	Klf13
Rps2	2.1009e-71	0.39	0.7	0.724	3.97153e-67	mature neutrophils	Rps2
Cdkn1b	4.08011e-71	0.419797	0.715	0.741	7.71305e-67	mature neutrophils	Cdkn1b
Chchd2	5.75178e-71	0.29983	0.819	0.897	1.08732e-66	mature neutrophils	Chchd2
Erp29	5.82822e-70	0.447447	0.579	0.536	1.10177e-65	mature neutrophils	Erp29
Rpl34	1.04768e-69	0.295669	0.903	0.935	1.98053e-65	mature neutrophils	Rpl34
Snap23	3.60678e-69	0.308707	0.83	0.883	6.81826e-65	mature neutrophils	Snap23
Ubl5	4.73333e-69	0.25974	0.888	0.947	8.94788e-65	mature neutrophils	Ubl5
Rpl19	5.40625e-69	0.329534	0.816	0.841	1.022e-64	mature neutrophils	Rpl19
Morf4l1	1.49131e-68	0.338355	0.761	0.844	2.81916e-64	mature neutrophils	Morf4l1
Cirbp	2.14941e-68	0.506951	0.491	0.405	4.06325e-64	mature neutrophils	Cirbp
Nedd8	2.43114e-68	0.35765	0.692	0.76	4.59582e-64	mature neutrophils	Nedd8
Eif5	4.6645e-68	0.409149	0.707	0.742	8.81776e-64	mature neutrophils	Eif5
Rpl35a	5.32656e-67	0.336393	0.868	0.906	1.00693e-62	mature neutrophils	Rpl35a
Abcg1	5.98605e-67	0.443841	0.277	0.143	1.1316e-62	mature neutrophils	Abcg1
Ubc1	6.23158e-67	0.388614	0.746	0.794	1.17802e-62	mature neutrophils	Ubc
Hnrnpu	8.96997e-67	0.470128	0.609	0.599	1.69568e-62	mature neutrophils	Hnrnpu
Apbb1ip	2.69126e-66	0.371085	0.704	0.756	5.08756e-62	mature neutrophils	Apbb1ip
Atp6v1f	7.73312e-66	0.345179	0.732	0.812	1.46187e-61	mature neutrophils	Atp6v1f
Hdc1	2.71644e-65	0.295706	0.951	0.98	5.13515e-61	mature neutrophils	Hdc
Ndufa7	4.8147e-65	0.429004	0.626	0.641	9.1017e-61	mature neutrophils	Ndufa7
Ctnnb1	3.051e-64	0.39376	0.699	0.719	5.76762e-60	mature neutrophils	Ctnnb1
Jun	1.80324e-63	0.811471	0.497	0.39	3.40884e-59	mature neutrophils	Jun
Card19	3.13466e-63	0.356162	0.695	0.749	5.92576e-59	mature neutrophils	Card19
Rps15	1.79162e-62	0.414635	0.619	0.61	3.38688e-58	mature neutrophils	Rps15
Srrm2	1.95625e-62	0.42252	0.637	0.659	3.69809e-58	mature neutrophils	Srrm2
Rpl26	2.39113e-61	0.359449	0.727	0.785	4.5202e-57	mature neutrophils	Rpl26
Cox4i1	4.58434e-61	0.286692	0.81	0.871	8.66623e-57	mature neutrophils	Cox4i1
Dynll1	2.94813e-60	0.538052	0.579	0.516	5.57314e-56	mature neutrophils	Dynll1
Rpl37a	1.3177e-59	0.284946	0.913	0.952	2.49098e-55	mature neutrophils	Rpl37a
Atp6v0b	1.33706e-59	0.310473	0.767	0.845	2.52758e-55	mature neutrophils	Atp6v0b
Cox17	6.73097e-59	0.346151	0.732	0.808	1.27242e-54	mature neutrophils	Cox17
Ptgs21	7.55583e-59	0.662632	0.461	0.327	1.42835e-54	mature neutrophils	Ptgs2
Rac1	2.11111e-58	0.256311	0.852	0.924	3.99084e-54	mature neutrophils	Rac1
Tmed2	2.88882e-58	0.405587	0.604	0.633	5.46103e-54	mature neutrophils	Tmed2
B9d2	2.58542e-57	0.44213	0.461	0.368	4.88749e-53	mature neutrophils	B9d2
Gpcpd1	1.38426e-56	0.33471	0.774	0.829	2.6168e-52	mature neutrophils	Gpcpd1
Rpl13	2.08373e-56	0.329829	0.774	0.809	3.93909e-52	mature neutrophils	Rpl13
Snrpg	2.11559e-56	0.477593	0.34	0.226	3.9993e-52	mature neutrophils	Snrpg
Scimp1	2.29602e-56	0.356571	0.188	0.075	4.3404e-52	mature neutrophils	Scimp
Nr4a11	1.11208e-55	0.59917	0.462	0.359	2.10228e-51	mature neutrophils	Nr4a1
Otulinl	4.78691e-55	0.34329	0.196	0.086	9.04918e-51	mature neutrophils	Otulinl
Serp1	3.88787e-54	0.313027	0.741	0.82	7.34964e-50	mature neutrophils	Serp1
Scarb2	7.72283e-54	0.435275	0.432	0.344	1.45992e-49	mature neutrophils	Scarb2
Rps5	4.4745e-53	0.3598	0.697	0.709	8.45859e-49	mature neutrophils	Rps5
1810058I24Rik1	6.82601e-53	0.33116	0.703	0.792	1.29039e-48	mature neutrophils	1810058I24Rik
Naca	1.49733e-52	0.371523	0.608	0.631	2.83056e-48	mature neutrophils	Naca
Dennd4a	2.15492e-52	0.376838	0.66	0.692	4.07367e-48	mature neutrophils	Dennd4a
Rpl32	1.01215e-51	0.394498	0.656	0.655	1.91337e-47	mature neutrophils	Rpl32
Cd244a	2.35106e-51	0.44618	0.503	0.435	4.44444e-47	mature neutrophils	Cd244a
Rgs2	2.68931e-51	0.397919	0.783	0.819	5.08388e-47	mature neutrophils	Rgs2
Slc25a3	3.25889e-51	0.387331	0.618	0.653	6.16061e-47	mature neutrophils	Slc25a3
Zfp36l1	1.00758e-50	0.445315	0.732	0.739	1.90473e-46	mature neutrophils	Zfp36l1
Kdm6b	1.24114e-50	0.36299	0.683	0.738	2.34626e-46	mature neutrophils	Kdm6b
Kpna41	1.5823e-50	0.427383	0.51	0.455	2.99118e-46	mature neutrophils	Kpna4
Rbm25	1.85187e-50	0.487433	0.478	0.425	3.50078e-46	mature neutrophils	Rbm25
Tspan131	2.80869e-50	0.307978	0.762	0.777	5.30956e-46	mature neutrophils	Tspan13
Ube2i	3.85548e-50	0.41445	0.541	0.548	7.2884e-46	mature neutrophils	Ube2i
Igsf8	5.72496e-50	0.368704	0.215	0.107	1.08225e-45	mature neutrophils	Igsf8
Tnni2	9.96845e-49	0.424486	0.273	0.16	1.88444e-44	mature neutrophils	Tnni2
Tra2a	1.4275e-48	0.42098	0.597	0.597	2.69854e-44	mature neutrophils	Tra2a
Cox7a2	2.20142e-48	0.310202	0.676	0.746	4.16156e-44	mature neutrophils	Cox7a2
Cox5b	2.29318e-48	0.309598	0.686	0.765	4.33502e-44	mature neutrophils	Cox5b
Pfdn2	3.30019e-48	0.422791	0.353	0.26	6.23868e-44	mature neutrophils	Pfdn2
Supt4a	1.11829e-47	0.256068	0.812	0.908	2.11402e-43	mature neutrophils	Supt4a
Hebp1	1.32511e-47	0.432798	0.604	0.598	2.50499e-43	mature neutrophils	Hebp1
Slc25a5	2.75675e-47	0.392439	0.612	0.654	5.21136e-43	mature neutrophils	Slc25a5
Fyb	5.41418e-47	0.338224	0.709	0.774	1.0235e-42	mature neutrophils	Fyb
Sntb2	1.37972e-46	0.46848	0.507	0.468	2.60823e-42	mature neutrophils	Sntb2
Tmem14c	1.43364e-46	0.32052	0.702	0.783	2.71015e-42	mature neutrophils	Tmem14c
Syt11	1.47618e-46	0.427659	0.348	0.239	2.79057e-42	mature neutrophils	Syt11
Arf1	1.03355e-45	0.255545	0.769	0.867	1.95381e-41	mature neutrophils	Arf1
Atp6ap2	2.08456e-45	0.431492	0.453	0.403	3.94065e-41	mature neutrophils	Atp6ap2
Gm10076	2.15204e-45	0.369453	0.621	0.673	4.06821e-41	mature neutrophils	Gm10076
Tax1bp1	3.12139e-45	0.291555	0.744	0.827	5.90068e-41	mature neutrophils	Tax1bp1
Bax	3.44752e-45	0.432901	0.289	0.187	6.5172e-41	mature neutrophils	Bax
Hnrnpab	1.57902e-44	0.404831	0.277	0.177	2.98498e-40	mature neutrophils	Hnrnpab
Clec4a31	8.06259e-44	0.379112	0.226	0.118	1.52415e-39	mature neutrophils	Clec4a3
Gadd45b1	9.297e-44	0.581504	0.424	0.33	1.7575e-39	mature neutrophils	Gadd45b
Hnrnpk	1.41658e-43	0.31762	0.646	0.72	2.6779e-39	mature neutrophils	Hnrnpk
Tomm7	1.55e-43	0.307175	0.676	0.771	2.93011e-39	mature neutrophils	Tomm7
Nap1l1	2.35431e-43	0.488715	0.392	0.303	4.45058e-39	mature neutrophils	Nap1l1
Igf1r	6.65103e-43	0.435845	0.519	0.497	1.25731e-38	mature neutrophils	Igf1r
Hint1	7.62591e-43	0.399738	0.288	0.189	1.4416e-38	mature neutrophils	Hint1
Fam122a	9.88109e-43	0.432148	0.506	0.49	1.86792e-38	mature neutrophils	Fam122a
Psenen	1.65027e-42	0.284572	0.708	0.81	3.11966e-38	mature neutrophils	Psenen
Cd37	1.86929e-42	0.267705	0.779	0.87	3.5337e-38	mature neutrophils	Cd37
Pcbd2	1.87218e-42	0.404656	0.295	0.196	3.53917e-38	mature neutrophils	Pcbd2
Rnasek	3.56485e-42	0.315163	0.704	0.79	6.73899e-38	mature neutrophils	Rnasek
Plin2	6.67855e-42	0.557652	0.636	0.678	1.26251e-37	mature neutrophils	Plin2
Tbc1d15	4.16885e-41	0.365694	0.589	0.629	7.88079e-37	mature neutrophils	Tbc1d15
Clta	2.74494e-40	0.269844	0.718	0.825	5.18903e-36	mature neutrophils	Clta
Eef1b2	4.01444e-40	0.331729	0.637	0.702	7.5889e-36	mature neutrophils	Eef1b2
Tctex1d2	4.07643e-40	0.400869	0.527	0.524	7.70608e-36	mature neutrophils	Tctex1d2
Nfkbia1	3.1128e-39	0.540817	0.69	0.682	5.88443e-35	mature neutrophils	Nfkbia
Gng10	4.60351e-39	0.484812	0.405	0.352	8.70248e-35	mature neutrophils	Gng10
Ddit3	4.63085e-39	0.434507	0.406	0.332	8.75416e-35	mature neutrophils	Ddit3
Nme2	7.05157e-39	0.453675	0.253	0.16	1.33303e-34	mature neutrophils	Nme2
Clec4n	1.29211e-38	0.317108	0.158	0.072	2.4426e-34	mature neutrophils	Clec4n
Mtdh	1.58045e-38	0.451883	0.385	0.317	2.98768e-34	mature neutrophils	Mtdh
Hist1h4h1	1.94251e-38	0.322609	0.107	0.038	3.67212e-34	mature neutrophils	Hist1h4h
Tomm6	2.0155e-38	0.339118	0.614	0.682	3.8101e-34	mature neutrophils	Tomm6
Pafah1b1	2.91064e-38	0.311949	0.644	0.742	5.50227e-34	mature neutrophils	Pafah1b1
Pcbp1	5.85382e-38	0.414862	0.445	0.413	1.10661e-33	mature neutrophils	Pcbp1
Klhl24	1.05026e-37	0.435717	0.461	0.431	1.98542e-33	mature neutrophils	Klhl24
Sf3b1	1.20292e-37	0.305826	0.674	0.753	2.27399e-33	mature neutrophils	Sf3b1
Snx201	1.53358e-37	0.268798	0.692	0.781	2.89908e-33	mature neutrophils	Snx20
Ptpn6	3.65649e-37	0.262058	0.758	0.857	6.91223e-33	mature neutrophils	Ptpn6
Mpeg1	4.08218e-37	0.389037	0.357	0.27	7.71694e-33	mature neutrophils	Mpeg1
Edf1	4.67383e-37	0.34677	0.566	0.641	8.8354e-33	mature neutrophils	Edf1
Matr3	5.38699e-37	0.35782	0.248	0.158	1.01836e-32	mature neutrophils	Matr3
Set	1.21111e-36	0.401698	0.296	0.211	2.28948e-32	mature neutrophils	Set
Rpl22	6.67777e-36	0.423569	0.566	0.609	1.26237e-31	mature neutrophils	Rpl22
Ube2s	9.14148e-36	0.379093	0.476	0.464	1.72811e-31	mature neutrophils	Ube2s
Cdkn1a	3.72797e-35	0.61657	0.37	0.284	7.04735e-31	mature neutrophils	Cdkn1a
Gpr35	4.12077e-35	0.345658	0.248	0.156	7.7899e-31	mature neutrophils	Gpr35
Rpl15	5.21602e-35	0.336676	0.615	0.675	9.86037e-31	mature neutrophils	Rpl15
Mif4gd	8.46167e-35	0.356691	0.284	0.197	1.59959e-30	mature neutrophils	Mif4gd
Exosc5	1.72423e-34	0.326293	0.236	0.148	3.25948e-30	mature neutrophils	Exosc5
Mdh2	2.24264e-34	0.380708	0.666	0.758	4.23948e-30	mature neutrophils	Mdh2
Serinc3	1.21431e-33	0.318117	0.643	0.731	2.29552e-29	mature neutrophils	Serinc3
Arhgdia	3.73869e-33	0.336681	0.572	0.629	7.06763e-29	mature neutrophils	Arhgdia
Atp2b1	3.8615e-33	0.424025	0.405	0.353	7.29978e-29	mature neutrophils	Atp2b1
Mkrn11	3.91412e-33	0.283383	0.636	0.73	7.39925e-29	mature neutrophils	Mkrn1
Ets21	3.96536e-33	0.335247	0.629	0.67	7.49612e-29	mature neutrophils	Ets2
Cox6a1	9.79783e-33	0.370347	0.515	0.55	1.85218e-28	mature neutrophils	Cox6a1
Ndufb9	2.34451e-32	0.257614	0.658	0.78	4.43205e-28	mature neutrophils	Ndufb9
Mrfap1	7.63714e-32	0.392462	0.489	0.504	1.44373e-27	mature neutrophils	Mrfap1
Sf3b6	1.03419e-31	0.324386	0.554	0.618	1.95503e-27	mature neutrophils	Sf3b6
Ttc7	3.62105e-31	0.33892	0.57	0.606	6.84524e-27	mature neutrophils	Ttc7
Slc28a2	4.49607e-31	0.357547	0.555	0.583	8.49937e-27	mature neutrophils	Slc28a2
Rps15a	4.50005e-31	0.282303	0.701	0.775	8.50689e-27	mature neutrophils	Rps15a
Kras	6.53207e-31	0.292221	0.675	0.782	1.23482e-26	mature neutrophils	Kras
Igsf61	8.99108e-31	0.277438	0.692	0.786	1.69967e-26	mature neutrophils	Igsf6
Ubxn1	9.14322e-31	0.3443	0.53	0.595	1.72843e-26	mature neutrophils	Ubxn1
Cox5a	1.07711e-30	0.326284	0.519	0.558	2.03616e-26	mature neutrophils	Cox5a
Marcksl11	1.55028e-30	0.327338	0.502	0.474	2.93066e-26	mature neutrophils	Marcksl1
Micos10	1.57159e-30	0.363951	0.484	0.498	2.97094e-26	mature neutrophils	Micos10
Anp32b	2.10912e-30	0.400853	0.372	0.321	3.98709e-26	mature neutrophils	Anp32b
Abca1	3.32522e-30	0.29185	0.163	0.087	6.28599e-26	mature neutrophils	Abca1
Polr2f	5.60744e-30	0.313697	0.213	0.134	1.06003e-25	mature neutrophils	Polr2f
Syk1	1.59868e-29	0.30054	0.654	0.737	3.02214e-25	mature neutrophils	Syk
Arf2	1.65464e-29	0.335321	0.186	0.108	3.12792e-25	mature neutrophils	Arf2
Rer1	1.67974e-29	0.34593	0.493	0.521	3.17539e-25	mature neutrophils	Rer1
Ppt1	2.32309e-29	0.382707	0.564	0.596	4.39157e-25	mature neutrophils	Ppt1
Man2b1	3.05752e-29	0.270778	0.712	0.815	5.77994e-25	mature neutrophils	Man2b1
Eef1d	3.96736e-29	0.363168	0.286	0.217	7.49989e-25	mature neutrophils	Eef1d
Ddx3x	6.586e-29	0.364614	0.523	0.535	1.24502e-24	mature neutrophils	Ddx3x
Stimate	8.78856e-29	0.334125	0.241	0.163	1.66139e-24	mature neutrophils	Stimate
Egr31	8.99044e-29	0.493328	0.301	0.213	1.69955e-24	mature neutrophils	Egr3
Snrpb	9.92986e-29	0.39311	0.369	0.328	1.87714e-24	mature neutrophils	Snrpb
4930581F22Rik	1.20623e-28	0.39764	0.328	0.263	2.28025e-24	mature neutrophils	4930581F22Rik
Clec4e1	1.29426e-28	0.257716	0.852	0.937	2.44666e-24	mature neutrophils	Clec4e
Atp5md	1.37572e-28	0.345026	0.54	0.607	2.60065e-24	mature neutrophils	Atp5md
Nufip2	1.40535e-28	0.399314	0.39	0.351	2.65667e-24	mature neutrophils	Nufip2
Sap18	3.87388e-28	0.386383	0.404	0.382	7.32317e-24	mature neutrophils	Sap18
Cks21	5.35807e-28	0.586763	0.336	0.255	1.01289e-23	mature neutrophils	Cks2
Sumo2	1.74286e-27	0.370616	0.447	0.452	3.29471e-23	mature neutrophils	Sumo2
Rpl14	3.99983e-27	0.43806	0.379	0.348	7.56128e-23	mature neutrophils	Rpl14
Srsf7	6.13031e-27	0.381565	0.324	0.267	1.15887e-22	mature neutrophils	Srsf7
Sec62	6.40295e-27	0.362887	0.534	0.591	1.21041e-22	mature neutrophils	Sec62
BC005624	7.56921e-27	0.365243	0.469	0.482	1.43088e-22	mature neutrophils	BC005624
Nfil3	9.15213e-27	0.299587	0.649	0.711	1.73012e-22	mature neutrophils	Nfil3
Nlrp3	9.22582e-27	0.344002	0.395	0.339	1.74405e-22	mature neutrophils	Nlrp3
Zeb2	9.52589e-27	0.377876	0.387	0.329	1.80077e-22	mature neutrophils	Zeb2
Npm1	1.2194e-26	0.3727	0.304	0.243	2.30514e-22	mature neutrophils	Npm1
Retreg1	1.82461e-26	0.375061	0.501	0.525	3.44924e-22	mature neutrophils	Retreg1
Ambp	3.28355e-26	0.38456	0.239	0.166	6.20722e-22	mature neutrophils	Ambp
Crebrf	4.45039e-26	0.370994	0.465	0.466	8.41302e-22	mature neutrophils	Crebrf
Sbno2	5.39459e-26	0.274557	0.64	0.725	1.01979e-21	mature neutrophils	Sbno2
H2afz	8.35959e-26	0.274555	0.738	0.847	1.5803e-21	mature neutrophils	H2afz
Ctsz	1.00838e-25	0.346928	0.517	0.55	1.90624e-21	mature neutrophils	Ctsz
Luc7l2	3.31783e-25	0.380104	0.455	0.463	6.27202e-21	mature neutrophils	Luc7l2
Oat	4.30659e-25	0.361482	0.4	0.369	8.14118e-21	mature neutrophils	Oat
Steap41	4.95075e-25	0.268989	0.772	0.811	9.35889e-21	mature neutrophils	Steap4
Rsrc2	5.65731e-25	0.380804	0.539	0.597	1.06946e-20	mature neutrophils	Rsrc2
Bnip3l1	6.6323e-25	0.263694	0.651	0.768	1.25377e-20	mature neutrophils	Bnip3l
Sdf4	2.01224e-24	0.33701	0.463	0.479	3.80394e-20	mature neutrophils	Sdf4
Rheb	2.67381e-24	0.330063	0.489	0.527	5.05457e-20	mature neutrophils	Rheb
Frat2	3.63243e-24	0.305152	0.21	0.142	6.86674e-20	mature neutrophils	Frat2
Foxp1	4.35725e-24	0.405518	0.369	0.324	8.23694e-20	mature neutrophils	Foxp1
Derl11	5.36145e-24	0.345146	0.471	0.499	1.01353e-19	mature neutrophils	Derl1
Serbp1	6.51459e-24	0.42408	0.369	0.341	1.23152e-19	mature neutrophils	Serbp1
Gm31683	2.0473e-23	0.271637	0.177	0.109	3.87022e-19	mature neutrophils	Gm31683
Klf10	2.05806e-23	0.32828	0.242	0.173	3.89055e-19	mature neutrophils	Klf10
Usf2	3.90508e-23	0.368283	0.426	0.429	7.38217e-19	mature neutrophils	Usf2
Prrc2c	4.49146e-23	0.380843	0.394	0.372	8.49066e-19	mature neutrophils	Prrc2c
Eapp	4.95408e-23	0.337671	0.5	0.545	9.3652e-19	mature neutrophils	Eapp
Lamp1	9.89371e-23	0.356798	0.448	0.456	1.87031e-18	mature neutrophils	Lamp1
Hsp90aa1	1.21329e-22	0.362139	0.462	0.457	2.2936e-18	mature neutrophils	Hsp90aa1
Grcc10	3.11178e-22	0.303524	0.537	0.6	5.88251e-18	mature neutrophils	Grcc10
Slc20a1	3.25774e-22	0.269333	0.179	0.113	6.15842e-18	mature neutrophils	Slc20a1
Vmp11	4.78267e-22	0.34425	0.645	0.726	9.04117e-18	mature neutrophils	Vmp1
Eif3j1	5.64901e-22	0.313399	0.217	0.152	1.06789e-17	mature neutrophils	Eif3j1
Srsf10	6.645e-22	0.327358	0.245	0.184	1.25617e-17	mature neutrophils	Srsf10
Ccnl1	7.47901e-22	0.323793	0.569	0.628	1.41383e-17	mature neutrophils	Ccnl1
Uqcrq	8.0607e-22	0.277262	0.562	0.652	1.5238e-17	mature neutrophils	Uqcrq
Pcbp2	8.81922e-22	0.352304	0.448	0.463	1.66719e-17	mature neutrophils	Pcbp2
Dusp21	1.31664e-21	0.40362	0.112	0.056	2.48898e-17	mature neutrophils	Dusp2
Znrd1	1.43721e-21	0.291153	0.206	0.142	2.71691e-17	mature neutrophils	Znrd1
Arf6	1.86878e-21	0.330339	0.416	0.405	3.53275e-17	mature neutrophils	Arf6
Taf10	2.76176e-21	0.359773	0.447	0.477	5.22083e-17	mature neutrophils	Taf10
Abr	2.97259e-21	0.342332	0.386	0.36	5.61939e-17	mature neutrophils	Abr
Trib11	3.08892e-21	0.268239	0.654	0.74	5.83929e-17	mature neutrophils	Trib1
Myadm	3.23422e-21	0.277362	0.686	0.785	6.11397e-17	mature neutrophils	Myadm
Ube2h	4.34134e-21	0.28304	0.686	0.802	8.20687e-17	mature neutrophils	Ube2h
Entpd3	5.25527e-21	0.343714	0.184	0.12	9.93457e-17	mature neutrophils	Entpd3
Hnrnpa0	6.17826e-21	0.327882	0.289	0.238	1.16794e-16	mature neutrophils	Hnrnpa0
Themis21	1.01982e-20	0.261194	0.59	0.663	1.92787e-16	mature neutrophils	Themis2
Rtn4	1.36301e-20	0.309396	0.535	0.614	2.57663e-16	mature neutrophils	Rtn4
Selenos	1.63963e-20	0.273552	0.183	0.121	3.09956e-16	mature neutrophils	Selenos
Alkbh5	3.04424e-20	0.325158	0.323	0.28	5.75483e-16	mature neutrophils	Alkbh5
Rps17	3.14181e-20	0.354492	0.443	0.461	5.93928e-16	mature neutrophils	Rps17
Sumo1	6.76197e-20	0.282879	0.522	0.611	1.27828e-15	mature neutrophils	Sumo1
Tmed10	1.40169e-19	0.326659	0.51	0.576	2.64976e-15	mature neutrophils	Tmed10
Lamtor2	1.4781e-19	0.350247	0.419	0.444	2.7942e-15	mature neutrophils	Lamtor2
Bcas2	1.53169e-19	0.299893	0.228	0.174	2.8955e-15	mature neutrophils	Bcas2
Snu13	1.55697e-19	0.332786	0.289	0.239	2.9433e-15	mature neutrophils	Snu13
Chmp5	1.58385e-19	0.28141	0.552	0.647	2.9941e-15	mature neutrophils	Chmp5
Cmip	1.62213e-19	0.315644	0.516	0.58	3.06647e-15	mature neutrophils	Cmip
Tra2b	2.49162e-19	0.364041	0.405	0.4	4.71017e-15	mature neutrophils	Tra2b
Rara	2.84504e-19	0.254717	0.606	0.698	5.37827e-15	mature neutrophils	Rara
Twistnb	3.14042e-19	0.331693	0.323	0.276	5.93665e-15	mature neutrophils	Twistnb
Apoe	3.76195e-19	0.668525	0.251	0.185	7.11158e-15	mature neutrophils	Apoe
Ifnar2	3.96016e-19	0.302047	0.584	0.692	7.48628e-15	mature neutrophils	Ifnar2
Nrros	4.32222e-19	0.331259	0.465	0.493	8.17072e-15	mature neutrophils	Nrros
0610010K14Rik	4.49166e-19	0.256534	0.186	0.127	8.49103e-15	mature neutrophils	0610010K14Rik
Atp5b	1.28805e-18	0.325914	0.484	0.542	2.43492e-14	mature neutrophils	Atp5b
Slc44a2	1.32964e-18	0.337836	0.436	0.448	2.51355e-14	mature neutrophils	Slc44a2
Nsmce4a	1.91981e-18	0.309169	0.295	0.253	3.62921e-14	mature neutrophils	Nsmce4a
Por	2.43417e-18	0.26509	0.64	0.751	4.60156e-14	mature neutrophils	Por
Bsg	3.02565e-18	0.336103	0.406	0.419	5.7197e-14	mature neutrophils	Bsg
Pip4p1	3.48453e-18	0.297088	0.23	0.176	6.58715e-14	mature neutrophils	Pip4p1
Gpr146	8.17892e-18	0.316075	0.329	0.292	1.54614e-13	mature neutrophils	Gpr146
Ndufa6	1.04841e-17	0.323015	0.453	0.497	1.98192e-13	mature neutrophils	Ndufa6
Gas5	1.27372e-17	0.350639	0.342	0.312	2.40784e-13	mature neutrophils	Gas5
Rps27rt	1.27719e-17	0.3405	0.331	0.304	2.4144e-13	mature neutrophils	Rps27rt
Manbal	1.45127e-17	0.27213	0.204	0.15	2.74349e-13	mature neutrophils	Manbal
Bnip3	1.50804e-17	0.296009	0.338	0.296	2.85079e-13	mature neutrophils	Bnip3
Tprgl	1.61444e-17	0.262919	0.59	0.707	3.05194e-13	mature neutrophils	Tprgl
Zzz3	2.41121e-17	0.269368	0.196	0.14	4.55816e-13	mature neutrophils	Zzz3
Furin	3.89254e-17	0.276551	0.533	0.606	7.35846e-13	mature neutrophils	Furin
Rpl5	1.02618e-16	0.336407	0.361	0.354	1.9399e-12	mature neutrophils	Rpl5
Washc2	1.21429e-16	0.325222	0.444	0.471	2.29549e-12	mature neutrophils	Washc2
Sbds	1.24711e-16	0.311926	0.245	0.197	2.35753e-12	mature neutrophils	Sbds
Cyth4	1.83237e-16	0.279528	0.557	0.649	3.46392e-12	mature neutrophils	Cyth4
5830428M24Rik	3.45758e-16	0.305628	0.236	0.187	6.53621e-12	mature neutrophils	5830428M24Rik
Fuca2	3.61018e-16	0.313124	0.307	0.272	6.82469e-12	mature neutrophils	Fuca2
Reep5	5.38958e-16	0.291225	0.522	0.609	1.01885e-11	mature neutrophils	Reep5
Mefv	9.24621e-16	0.302823	0.311	0.27	1.7479e-11	mature neutrophils	Mefv
Eif3a	1.06936e-15	0.321082	0.226	0.178	2.02151e-11	mature neutrophils	Eif3a
Dnajb9	1.14169e-15	0.348265	0.342	0.319	2.15825e-11	mature neutrophils	Dnajb9
Ptafr1	1.18545e-15	0.333515	0.456	0.482	2.24098e-11	mature neutrophils	Ptafr
Acsl1	1.50908e-15	0.35003	0.235	0.19	2.85277e-11	mature neutrophils	Acsl1
Nfe2l2	1.67239e-15	0.310519	0.522	0.592	3.16148e-11	mature neutrophils	Nfe2l2
Ccnl2	2.08493e-15	0.334183	0.435	0.468	3.94135e-11	mature neutrophils	Ccnl2
Itgb11	2.23291e-15	0.271628	0.215	0.163	4.2211e-11	mature neutrophils	Itgb1
Ythdc1	2.50968e-15	0.380626	0.408	0.42	4.74431e-11	mature neutrophils	Ythdc1
Lcp2	2.94558e-15	0.301176	0.484	0.533	5.56833e-11	mature neutrophils	Lcp2
Fbxl12	3.12635e-15	0.262877	0.18	0.13	5.91005e-11	mature neutrophils	Fbxl12
St13	3.43302e-15	0.29094	0.206	0.156	6.48979e-11	mature neutrophils	St13
Mrpl43	3.63841e-15	0.317502	0.448	0.502	6.87805e-11	mature neutrophils	Mrpl43
Mdm2	4.02988e-15	0.360494	0.382	0.393	7.61808e-11	mature neutrophils	Mdm2
Cbx3	4.34598e-15	0.304544	0.234	0.19	8.21564e-11	mature neutrophils	Cbx3
Srsf11	4.54894e-15	0.360358	0.333	0.316	8.59932e-11	mature neutrophils	Srsf11
Lrrc25	5.32966e-15	0.275025	0.535	0.624	1.00752e-10	mature neutrophils	Lrrc25
Pnisr	6.90052e-15	0.356279	0.384	0.389	1.30448e-10	mature neutrophils	Pnisr
Arhgap45	7.80977e-15	0.252024	0.587	0.697	1.47636e-10	mature neutrophils	Arhgap45
Ier3ip1	9.06579e-15	0.340824	0.472	0.544	1.7138e-10	mature neutrophils	Ier3ip1
Creg11	1.46348e-14	0.277696	0.525	0.595	2.76656e-10	mature neutrophils	Creg1
Il10rb	1.5015e-14	0.322391	0.43	0.461	2.83844e-10	mature neutrophils	Il10rb
Sf3b5	1.64233e-14	0.338702	0.353	0.353	3.10467e-10	mature neutrophils	Sf3b5
Cnih4	1.79828e-14	0.339802	0.37	0.375	3.39947e-10	mature neutrophils	Cnih4
Suds3	2.57368e-14	0.310135	0.42	0.452	4.86528e-10	mature neutrophils	Suds3
Lman2	3.96066e-14	0.311019	0.43	0.479	7.48722e-10	mature neutrophils	Lman2
Gls	4.8537e-14	0.285453	0.262	0.221	9.17544e-10	mature neutrophils	Gls
Mirt1	5.79449e-14	0.33929	0.397	0.408	1.09539e-09	mature neutrophils	Mirt1
Hnrnpa2b1	6.60151e-14	0.299563	0.517	0.602	1.24795e-09	mature neutrophils	Hnrnpa2b1
Bclaf1	1.15749e-13	0.339039	0.299	0.275	2.18813e-09	mature neutrophils	Bclaf1
Prpf4b	1.29687e-13	0.31023	0.218	0.176	2.45161e-09	mature neutrophils	Prpf4b
Tpr	1.39961e-13	0.364721	0.375	0.381	2.64581e-09	mature neutrophils	Tpr
Cd63	1.82437e-13	0.313681	0.41	0.422	3.44879e-09	mature neutrophils	Cd63
Kcnj2	1.99072e-13	0.279754	0.205	0.159	3.76326e-09	mature neutrophils	Kcnj2
Cox14	2.43985e-13	0.291534	0.459	0.516	4.6123e-09	mature neutrophils	Cox14
Llph	2.53061e-13	0.341612	0.329	0.317	4.78387e-09	mature neutrophils	Llph
Asap1	3.68214e-13	0.332459	0.446	0.502	6.96071e-09	mature neutrophils	Asap1
Fam174a1	5.79732e-13	0.266267	0.505	0.561	1.09592e-08	mature neutrophils	Fam174a
Ppm1g	7.31971e-13	0.270869	0.208	0.17	1.38372e-08	mature neutrophils	Ppm1g
Polr1d	7.37206e-13	0.30375	0.379	0.406	1.39361e-08	mature neutrophils	Polr1d
Snrnp70	9.32957e-13	0.323639	0.383	0.396	1.76366e-08	mature neutrophils	Snrnp70
Mtpn	9.94359e-13	0.25754	0.54	0.651	1.87974e-08	mature neutrophils	Mtpn
Hsbp1	1.42514e-12	0.30288	0.477	0.553	2.69408e-08	mature neutrophils	Hsbp1
Celf2	1.63331e-12	0.285845	0.545	0.644	3.08762e-08	mature neutrophils	Celf2
Batf	1.89172e-12	0.285694	0.289	0.264	3.57611e-08	mature neutrophils	Batf
Dusp11	2.05404e-12	0.303238	0.461	0.53	3.88296e-08	mature neutrophils	Dusp11
Rab14	2.57837e-12	0.252647	0.538	0.652	4.87414e-08	mature neutrophils	Rab14
Dleu2	3.1616e-12	0.288665	0.49	0.549	5.97669e-08	mature neutrophils	Dleu2
Snhg8	3.63848e-12	0.293303	0.239	0.203	6.87818e-08	mature neutrophils	Snhg8
Sh3bp1	4.06498e-12	0.285502	0.235	0.198	7.68444e-08	mature neutrophils	Sh3bp1
N4bp2l1	4.46539e-12	0.329313	0.345	0.341	8.44138e-08	mature neutrophils	N4bp2l1
Eif4a2	4.57633e-12	0.284961	0.418	0.449	8.6511e-08	mature neutrophils	Eif4a2
Ccl3	4.84098e-12	0.395214	0.106	0.065	9.15139e-08	mature neutrophils	Ccl3
Arl6ip1	4.90389e-12	0.274849	0.508	0.598	9.27031e-08	mature neutrophils	Arl6ip1
Cdv3	5.13463e-12	0.287321	0.193	0.155	9.7065e-08	mature neutrophils	Cdv3
Coq10b	7.18075e-12	0.296657	0.4	0.423	1.35745e-07	mature neutrophils	Coq10b
Cd82	7.25585e-12	0.286543	0.47	0.538	1.37165e-07	mature neutrophils	Cd82
Abracl	7.70568e-12	0.251875	0.553	0.657	1.45668e-07	mature neutrophils	Abracl
Ndufs7	7.87382e-12	0.299493	0.313	0.306	1.48847e-07	mature neutrophils	Ndufs7
Cib1	8.63499e-12	0.290996	0.441	0.507	1.63236e-07	mature neutrophils	Cib1
Ttyh3	9.02291e-12	0.294878	0.427	0.463	1.70569e-07	mature neutrophils	Ttyh3
Ppp2r2d	9.90966e-12	0.293812	0.263	0.235	1.87332e-07	mature neutrophils	Ppp2r2d
Ptges3	1.30451e-11	0.307225	0.275	0.252	2.46604e-07	mature neutrophils	Ptges3
Aup1	1.4691e-11	0.289255	0.26	0.236	2.77718e-07	mature neutrophils	Aup1
Ywhah1	1.47561e-11	0.260303	0.517	0.621	2.78949e-07	mature neutrophils	Ywhah
Spint2	1.59862e-11	0.255524	0.187	0.148	3.02204e-07	mature neutrophils	Spint2
Nisch	2.10853e-11	0.316088	0.349	0.353	3.98597e-07	mature neutrophils	Nisch
Cdc34	2.42914e-11	0.327707	0.374	0.399	4.59204e-07	mature neutrophils	Cdc34
Csf1r	2.5584e-11	0.261383	0.363	0.356	4.8364e-07	mature neutrophils	Csf1r
Smarca5	2.87639e-11	0.331475	0.282	0.261	5.43752e-07	mature neutrophils	Smarca5
Atf4	3.21892e-11	0.319271	0.419	0.46	6.08504e-07	mature neutrophils	Atf4
Pgp	4.41675e-11	0.264923	0.192	0.156	8.34942e-07	mature neutrophils	Pgp
Plekhj1	5.33528e-11	0.292515	0.377	0.4	1.00858e-06	mature neutrophils	Plekhj1
Rbm8a	5.68229e-11	0.294244	0.318	0.317	1.07418e-06	mature neutrophils	Rbm8a
Safb2	6.06123e-11	0.288104	0.251	0.224	1.14582e-06	mature neutrophils	Safb2
Dazap1	6.8829e-11	0.270072	0.24	0.211	1.30114e-06	mature neutrophils	Dazap1
Anapc11	7.68254e-11	0.257589	0.19	0.153	1.45231e-06	mature neutrophils	Anapc11
Angel2	9.61348e-11	0.26567	0.218	0.184	1.81733e-06	mature neutrophils	Angel2
Herpud1	9.91696e-11	0.290029	0.329	0.325	1.8747e-06	mature neutrophils	Herpud1
Hmox1	1.02206e-10	0.323567	0.425	0.468	1.9321e-06	mature neutrophils	Hmox1
Swt1	1.07552e-10	0.28066	0.271	0.248	2.03316e-06	mature neutrophils	Swt1
Pcmtd1	1.33475e-10	0.269596	0.214	0.18	2.52321e-06	mature neutrophils	Pcmtd1
Atp6v1b2	1.35902e-10	0.287527	0.477	0.557	2.56908e-06	mature neutrophils	Atp6v1b2
Ezr	1.45112e-10	0.334433	0.417	0.462	2.7432e-06	mature neutrophils	Ezr
Bloc1s2	1.62072e-10	0.281806	0.407	0.434	3.06381e-06	mature neutrophils	Bloc1s2
Eif2s2	1.80558e-10	0.338358	0.306	0.295	3.41328e-06	mature neutrophils	Eif2s2
Tm9sf3	1.81374e-10	0.294294	0.393	0.428	3.4287e-06	mature neutrophils	Tm9sf3
Phf3	1.86697e-10	0.309732	0.359	0.371	3.52932e-06	mature neutrophils	Phf3
Sap30l	2.35631e-10	0.294197	0.331	0.338	4.45438e-06	mature neutrophils	Sap30l
Atxn7l3b	2.78454e-10	0.303443	0.483	0.576	5.2639e-06	mature neutrophils	Atxn7l3b
Trpm7	3.09628e-10	0.260217	0.181	0.145	5.8532e-06	mature neutrophils	Trpm7
Tmed9	3.5123e-10	0.287178	0.258	0.241	6.63964e-06	mature neutrophils	Tmed9
Leprotl1	4.19421e-10	0.299733	0.382	0.416	7.92873e-06	mature neutrophils	Leprotl1
Pcf11	4.49368e-10	0.279452	0.282	0.264	8.49485e-06	mature neutrophils	Pcf11
Ip6k1	5.44771e-10	0.260655	0.383	0.408	1.02984e-05	mature neutrophils	Ip6k1
Ate1	5.70461e-10	0.263971	0.201	0.169	1.0784e-05	mature neutrophils	Ate1
Hectd1	5.87983e-10	0.286293	0.473	0.558	1.11152e-05	mature neutrophils	Hectd1
Plekho21	5.93648e-10	0.297312	0.41	0.448	1.12223e-05	mature neutrophils	Plekho2
Pcnp	6.20442e-10	0.281583	0.332	0.339	1.17288e-05	mature neutrophils	Pcnp
Srp9	6.97588e-10	0.262179	0.48	0.579	1.31872e-05	mature neutrophils	Srp9
Rassf1	7.21451e-10	0.250764	0.229	0.199	1.36383e-05	mature neutrophils	Rassf1
Tagln21	7.95672e-10	0.294189	0.453	0.466	1.50414e-05	mature neutrophils	Tagln2
Scgb1a1	8.51424e-10	0.366613	0.25	0.224	1.60953e-05	mature neutrophils	Scgb1a1
Zcchc7	1.01448e-09	0.259125	0.225	0.196	1.91778e-05	mature neutrophils	Zcchc7
Hist1h2be	1.15189e-09	0.268485	0.307	0.294	2.17752e-05	mature neutrophils	Hist1h2be
Ankrd12	1.4288e-09	0.347688	0.356	0.367	2.70101e-05	mature neutrophils	Ankrd12
Tgfb1	1.72698e-09	0.289739	0.34	0.343	3.26468e-05	mature neutrophils	Tgfb1
Dedd2	1.99751e-09	0.282474	0.407	0.456	3.77609e-05	mature neutrophils	Dedd2
Amn1	2.40187e-09	0.29371	0.256	0.236	4.5405e-05	mature neutrophils	Amn1
Ncl	2.45919e-09	0.331481	0.28	0.27	4.64886e-05	mature neutrophils	Ncl
Tmbim4	2.46905e-09	0.270994	0.436	0.499	4.66748e-05	mature neutrophils	Tmbim4
Il6ra	2.68213e-09	0.25744	0.435	0.488	5.0703e-05	mature neutrophils	Il6ra
Tnrc6c	2.94988e-09	0.307208	0.288	0.282	5.57646e-05	mature neutrophils	Tnrc6c
Tgoln1	3.02208e-09	0.277396	0.403	0.432	5.71294e-05	mature neutrophils	Tgoln1
Zfp706	3.13e-09	0.281817	0.35	0.366	5.91695e-05	mature neutrophils	Zfp706
Cir1	3.2626e-09	0.301026	0.435	0.487	6.16761e-05	mature neutrophils	Cir1
Edem2	3.90823e-09	0.252006	0.465	0.536	7.38812e-05	mature neutrophils	Edem2
Srrm1	4.89625e-09	0.323856	0.343	0.358	9.25587e-05	mature neutrophils	Srrm1
Chsy1	7.00476e-09	0.269762	0.345	0.354	0.000132418	mature neutrophils	Chsy1
N4bp2l2	8.382e-09	0.270586	0.244	0.224	0.000158453	mature neutrophils	N4bp2l2
Cspp1	8.47141e-09	0.281687	0.227	0.203	0.000160143	mature neutrophils	Cspp1
Bag1	9.76051e-09	0.29417	0.33	0.348	0.000184513	mature neutrophils	Bag1
Atp6ap1	1.16456e-08	0.268431	0.408	0.461	0.000220149	mature neutrophils	Atp6ap1
Ranbp2	1.37457e-08	0.252154	0.228	0.203	0.000259848	mature neutrophils	Ranbp2
Kif5b	1.38485e-08	0.296053	0.419	0.476	0.000261792	mature neutrophils	Kif5b
Trmt112	1.59371e-08	0.264394	0.194	0.167	0.000301274	mature neutrophils	Trmt112
Uqcr10	1.75247e-08	0.287406	0.462	0.56	0.000331287	mature neutrophils	Uqcr10
Spcs2	1.93937e-08	0.291563	0.294	0.296	0.000366618	mature neutrophils	Spcs2
Iqsec1	2.25279e-08	0.285099	0.465	0.553	0.000425868	mature neutrophils	Iqsec1
Puf60	2.39805e-08	0.284741	0.282	0.277	0.000453328	mature neutrophils	Puf60
Crk	2.59393e-08	0.278209	0.285	0.279	0.000490357	mature neutrophils	Crk
Ctcf	2.83754e-08	0.299517	0.298	0.299	0.000536408	mature neutrophils	Ctcf
Mysm1	2.90219e-08	0.255667	0.224	0.2	0.00054863	mature neutrophils	Mysm1
Zzef1	3.22953e-08	0.282561	0.259	0.245	0.00061051	mature neutrophils	Zzef1
Uqcc3	3.59201e-08	0.270643	0.26	0.252	0.000679033	mature neutrophils	Uqcc3
Pip4k2a	3.68048e-08	0.27282	0.351	0.369	0.000695758	mature neutrophils	Pip4k2a
Retreg2	3.84711e-08	0.267782	0.264	0.253	0.000727258	mature neutrophils	Retreg2
Rasa31	3.96051e-08	0.281677	0.347	0.362	0.000748694	mature neutrophils	Rasa3
Polr2a	4.82599e-08	0.29653	0.305	0.307	0.000912305	mature neutrophils	Polr2a
BC005537	6.5691e-08	0.276627	0.382	0.422	0.00124182	mature neutrophils	BC005537
Rpl36al	1.07593e-07	0.29475	0.222	0.205	0.00203393	mature neutrophils	Rpl36al
mt-Nd2	1.13664e-07	0.336982	0.526	0.626	0.0021487	mature neutrophils	mt-Nd2
Eloc	1.19168e-07	0.260681	0.459	0.558	0.00225275	mature neutrophils	Eloc
Tnrc6a	1.23388e-07	0.282901	0.306	0.309	0.00233253	mature neutrophils	Tnrc6a
Rbbp6	1.41918e-07	0.298482	0.265	0.259	0.00268282	mature neutrophils	Rbbp6
Mthfsl	1.70152e-07	0.264873	0.405	0.463	0.00321656	mature neutrophils	Mthfsl
Naaa	2.55138e-07	0.25409	0.234	0.216	0.00482313	mature neutrophils	Naaa
Drap1	3.10854e-07	0.308339	0.357	0.393	0.00587639	mature neutrophils	Drap1
Rnase4	3.2689e-07	0.250673	0.199	0.176	0.00617953	mature neutrophils	Rnase4
Nptn1	3.38284e-07	0.27506	0.323	0.34	0.00639491	mature neutrophils	Nptn
Arrdc3	3.8541e-07	0.294086	0.323	0.325	0.0072858	mature neutrophils	Arrdc3
Snrpe	3.92718e-07	0.269631	0.246	0.236	0.00742394	mature neutrophils	Snrpe
Pip5k1c	3.93245e-07	0.254382	0.242	0.228	0.0074339	mature neutrophils	Pip5k1c
Nsd1	3.99384e-07	0.283467	0.319	0.331	0.00754995	mature neutrophils	Nsd1
Cnppd1	4.61095e-07	0.278414	0.358	0.391	0.00871653	mature neutrophils	Cnppd1
Ankrd11	5.29015e-07	0.257651	0.501	0.61	0.0100005	mature neutrophils	Ankrd11
Kmt2c	7.20706e-07	0.26262	0.271	0.265	0.0136242	mature neutrophils	Kmt2c
Mrps33	9.32494e-07	0.281331	0.25	0.243	0.0176279	mature neutrophils	Mrps33
Slc38a2	1.20566e-06	0.314497	0.394	0.439	0.0227919	mature neutrophils	Slc38a2
Spag9	1.41497e-06	0.299004	0.321	0.341	0.0267485	mature neutrophils	Spag9
Spty2d1	1.42794e-06	0.260669	0.269	0.266	0.0269937	mature neutrophils	Spty2d1
Pnpla7	1.80987e-06	0.27224	0.321	0.335	0.0342138	mature neutrophils	Pnpla7
Itch	1.95667e-06	0.301859	0.271	0.273	0.0369889	mature neutrophils	Itch
Nfat5	2.02416e-06	0.262338	0.263	0.256	0.0382647	mature neutrophils	Nfat5
Cab39	2.5839e-06	0.265066	0.324	0.349	0.048846	mature neutrophils	Cab39
Ubn1	3.11475e-06	0.287965	0.324	0.349	0.0588813	mature neutrophils	Ubn1
Strap	3.56049e-06	0.260844	0.293	0.305	0.0673074	mature neutrophils	Strap
Cd300ld	4.10486e-06	0.277094	0.322	0.334	0.0775984	mature neutrophils	Cd300ld
Wtap	4.26263e-06	0.269099	0.244	0.24	0.0805807	mature neutrophils	Wtap
Map3k8	4.50141e-06	0.263407	0.257	0.248	0.0850946	mature neutrophils	Map3k8
Mien1	5.28477e-06	0.265699	0.348	0.388	0.0999033	mature neutrophils	Mien1
Med30	5.35114e-06	0.275376	0.327	0.356	0.101158	mature neutrophils	Med30
1810013L24Rik	6.20337e-06	0.284548	0.318	0.338	0.117269	mature neutrophils	1810013L24Rik
Brd1	8.54085e-06	0.260887	0.312	0.335	0.161456	mature neutrophils	Brd1
Polr2j	8.75285e-06	0.256958	0.312	0.339	0.165464	mature neutrophils	Polr2j
Prpf38b	9.07317e-06	0.275572	0.288	0.298	0.171519	mature neutrophils	Prpf38b
Sltm	9.67663e-06	0.276399	0.236	0.228	0.182927	mature neutrophils	Sltm
Tcf25	9.7862e-06	0.289971	0.413	0.493	0.184998	mature neutrophils	Tcf25
Gtf2h5	1.11777e-05	0.276956	0.277	0.286	0.211304	mature neutrophils	Gtf2h5
Mbnl2	1.2892e-05	0.266043	0.372	0.414	0.24371	mature neutrophils	Mbnl2
Cic	1.3425e-05	0.254679	0.263	0.267	0.253786	mature neutrophils	Cic
Rb1cc1	1.42318e-05	0.264228	0.44	0.515	0.269038	mature neutrophils	Rb1cc1
Rest	1.48523e-05	0.256249	0.226	0.215	0.280769	mature neutrophils	Rest
Cggbp1	1.50871e-05	0.252203	0.475	0.589	0.285206	mature neutrophils	Cggbp1
Gm16286	1.60849e-05	0.273415	0.36	0.422	0.304069	mature neutrophils	Gm16286
Tnfrsf1b	1.60957e-05	0.25067	0.353	0.386	0.304273	mature neutrophils	Tnfrsf1b
Tmem234	2.02795e-05	0.25269	0.473	0.588	0.383364	mature neutrophils	Tmem234
Taok3	2.09413e-05	0.271777	0.215	0.204	0.395874	mature neutrophils	Taok3
Uqcr11	2.18538e-05	0.269177	0.391	0.473	0.413124	mature neutrophils	Uqcr11
Snw1	2.54744e-05	0.255684	0.243	0.241	0.481567	mature neutrophils	Snw1
Qk	2.57797e-05	0.263508	0.339	0.371	0.487339	mature neutrophils	Qk
Brd2	2.7711e-05	0.268519	0.311	0.331	0.52385	mature neutrophils	Brd2
Xpr1	2.77883e-05	0.260449	0.294	0.306	0.52531	mature neutrophils	Xpr1
Pkn2	3.10201e-05	0.254392	0.27	0.279	0.586404	mature neutrophils	Pkn2
Zmiz1	3.38395e-05	0.264793	0.282	0.29	0.639701	mature neutrophils	Zmiz1
Txnl4a	3.4043e-05	0.257612	0.256	0.261	0.643549	mature neutrophils	Txnl4a
Ddx24	3.45008e-05	0.261156	0.327	0.354	0.652204	mature neutrophils	Ddx24
Ing1	3.99492e-05	0.265967	0.299	0.314	0.7552	mature neutrophils	Ing1
Etfb	5.90464e-05	0.276216	0.224	0.223	1	mature neutrophils	Etfb
Otulin	6.48582e-05	0.264246	0.226	0.224	1	mature neutrophils	Otulin
Leprot	6.86578e-05	0.259909	0.393	0.447	1	mature neutrophils	Leprot
Il1rap	9.41255e-05	0.258434	0.36	0.393	1	mature neutrophils	Il1rap
Gpbp1	0.000101213	0.25361	0.306	0.33	1	mature neutrophils	Gpbp1
Unc50	0.000111981	0.266549	0.313	0.35	1	mature neutrophils	Unc50
Bzw1	0.000112597	0.274226	0.363	0.424	1	mature neutrophils	Bzw1
Clk4	0.000112632	0.264692	0.313	0.342	1	mature neutrophils	Clk4
Tet2	0.00011742	0.260865	0.293	0.306	1	mature neutrophils	Tet2
Nktr	0.000121307	0.250514	0.339	0.371	1	mature neutrophils	Nktr
Mpc1	0.000144565	0.267325	0.384	0.459	1	mature neutrophils	Mpc1
Tnfsf14	0.000171935	0.256379	0.291	0.307	1	mature neutrophils	Tnfsf14
Neu1	0.00020487	0.257823	0.321	0.355	1	mature neutrophils	Neu1
Ptk2b	0.000211939	0.251491	0.319	0.352	1	mature neutrophils	Ptk2b
Abi1	0.000234236	0.255055	0.384	0.454	1	mature neutrophils	Abi1
Cdc5l	0.000286751	0.288989	0.272	0.288	1	mature neutrophils	Cdc5l
Arf4	0.00034934	0.267229	0.353	0.403	1	mature neutrophils	Arf4
Sfr1	0.000358855	0.291055	0.331	0.374	1	mature neutrophils	Sfr1
Sp3os	0.000551928	0.264349	0.265	0.277	1	mature neutrophils	Sp3os
Dpm1	0.000780278	0.254826	0.313	0.354	1	mature neutrophils	Dpm1
Pum2	0.00086228	0.267928	0.313	0.349	1	mature neutrophils	Pum2
Scaf11	0.000913874	0.2507	0.272	0.288	1	mature neutrophils	Scaf11
Ppig	0.00116371	0.276101	0.271	0.291	1	mature neutrophils	Ppig
Cstb	0.00179681	0.281267	0.464	0.566	1	mature neutrophils	Cstb
Ndufa41	0.00187558	0.250749	0.343	0.401	1	mature neutrophils	Ndufa4
Nsrp1	0.00195401	0.271397	0.247	0.256	1	mature neutrophils	Nsrp1
Dnajc8	0.00198974	0.253912	0.43	0.54	1	mature neutrophils	Dnajc8
Gm15987	0.00230728	0.30637	0.333	0.379	1	mature neutrophils	Gm15987
Bcl6	0.00240236	0.254704	0.357	0.413	1	mature neutrophils	Bcl6
Srsf3	0.00424279	0.258268	0.318	0.364	1	mature neutrophils	Srsf3
Mycbp2	0.00431394	0.251265	0.289	0.32	1	mature neutrophils	Mycbp2
Atp5g2	0.00481003	0.255092	0.2	0.205	1	mature neutrophils	Atp5g2
Xist	0.00806693	0.400119	0.398	0.491	1	mature neutrophils	Xist
Ngp	0	3.79663	0.999	0.326	0	MDSCs	Ngp
Camp	0	3.6506	0.901	0.093	0	MDSCs	Camp
Ltf	0	3.14089	0.834	0.048	0	MDSCs	Ltf
Ifitm6	0	2.05558	1	0.595	0	MDSCs	Ifitm6
Cybb	0	1.69706	0.955	0.177	0	MDSCs	Cybb
Ly6g	0	1.69236	0.997	0.36	0	MDSCs	Ly6g
Lcn2	0	1.6308	1	0.835	0	MDSCs	Lcn2
Serpinb1a	0	1.59355	0.88	0.095	0	MDSCs	Serpinb1a
Lyz2	0	1.50747	0.999	0.795	0	MDSCs	Lyz2
Cd177	0	1.46703	0.998	0.335	0	MDSCs	Cd177
Anxa3	0	1.38741	0.959	0.125	0	MDSCs	Anxa3
Aldh21	0	1.38603	0.997	0.417	0	MDSCs	Aldh2
Anxa1	0	1.29374	1	0.948	0	MDSCs	Anxa1
Chil3	0	1.26094	0.616	0.061	0	MDSCs	Chil3
Lgals3	0	1.17024	0.996	0.659	0	MDSCs	Lgals3
Capg	0	1.11849	0.96	0.15	0	MDSCs	Capg
Adpgk	0	1.11111	0.975	0.224	0	MDSCs	Adpgk
Ly6c2	0	1.05581	0.795	0.128	0	MDSCs	Ly6c2
AA467197	0	0.990184	0.982	0.437	0	MDSCs	AA467197
Dstn	0	0.909816	0.992	0.636	0	MDSCs	Dstn
Ckap4	0	0.878688	0.984	0.408	0	MDSCs	Ckap4
S100a8	0	0.859349	1	0.999	0	MDSCs	S100a8
Ceacam10	0	0.84875	0.918	0.248	0	MDSCs	Ceacam10
Tmem256	0	0.819991	0.884	0.128	0	MDSCs	Tmem256
Tkt	0	0.809134	0.998	0.597	0	MDSCs	Tkt
Arhgdib	0	0.789643	0.999	0.918	0	MDSCs	Arhgdib
Emp3	0	0.764995	0.861	0.153	0	MDSCs	Emp3
Syne1	0	0.74823	0.879	0.182	0	MDSCs	Syne1
G6pdx	0	0.746166	0.981	0.416	0	MDSCs	G6pdx
Pglyrp1	0	0.703723	1	0.948	0	MDSCs	Pglyrp1
Aprt	0	0.662868	0.855	0.222	0	MDSCs	Aprt
Mgst2	0	0.645887	0.667	0.088	0	MDSCs	Mgst2
Cebpe	0	0.643753	0.5	0.047	0	MDSCs	Cebpe
Ggt1	0	0.639196	0.719	0.167	0	MDSCs	Ggt1
4930438A08Rik	0	0.620178	0.759	0.046	0	MDSCs	4930438A08Rik
Txndc17	0	0.599146	0.939	0.287	0	MDSCs	Txndc17
Lrmp	0	0.577328	0.798	0.134	0	MDSCs	Lrmp
Ethe1	0	0.573227	0.763	0.129	0	MDSCs	Ethe1
Cd3d	0	0.558019	0.682	0.141	0	MDSCs	Cd3d
Padi4	0	0.539979	0.869	0.205	0	MDSCs	Padi4
Hsp90ab1	0	0.536676	0.881	0.242	0	MDSCs	Hsp90ab1
Dok2	0	0.509442	0.675	0.066	0	MDSCs	Dok2
Fdps	0	0.509307	0.534	0.042	0	MDSCs	Fdps
Ppm1m	0	0.50844	0.888	0.24	0	MDSCs	Ppm1m
Ak2	0	0.504762	0.672	0.069	0	MDSCs	Ak2
Ceacam1	0	0.495405	0.744	0.148	0	MDSCs	Ceacam1
Lims1	0	0.491991	0.835	0.215	0	MDSCs	Lims1
Hsd11b1	0	0.475939	0.686	0.084	0	MDSCs	Hsd11b1
B230208H11Rik	0	0.430484	0.672	0.11	0	MDSCs	B230208H11Rik
Slc25a24	0	0.416509	0.732	0.128	0	MDSCs	Slc25a24
Arl2bp	0	0.399892	0.808	0.192	0	MDSCs	Arl2bp
Rnaseh2c	0	0.392202	0.682	0.128	0	MDSCs	Rnaseh2c
Adss	0	0.376788	0.585	0.068	0	MDSCs	Adss
Rab3d	0	0.373041	0.7	0.123	0	MDSCs	Rab3d
Nt5c3	0	0.346763	0.688	0.129	0	MDSCs	Nt5c3
Fmo5	0	0.327119	0.591	0.073	0	MDSCs	Fmo5
Olfml2b	0	0.31522	0.418	0.016	0	MDSCs	Olfml2b
Anxa5	0	0.300458	0.479	0.047	0	MDSCs	Anxa5
Cd55	0	0.300299	0.44	0.019	0	MDSCs	Cd55
Pycard	0	0.297689	0.508	0.067	0	MDSCs	Pycard
Rhou	0	0.274064	0.48	0.043	0	MDSCs	Rhou
2022-09-01	0	0.269045	0.439	0.034	0	MDSCs	2022-09-01
Ly75	0	0.259162	0.463	0.042	0	MDSCs	Ly75
Lipg	1.2372e-294	0.447819	0.676	0.147	2.3388e-290	MDSCs	Lipg
S100a9	9.90942e-293	0.487037	1	1	1.87328e-288	MDSCs	S100a9
Hopx	1.44335e-292	0.534849	0.842	0.242	2.72852e-288	MDSCs	Hopx
Rgs181	9.86632e-292	0.319831	0.695	0.148	1.86513e-287	MDSCs	Rgs18
Orm1	1.74179e-290	0.3848	0.243	0.011	3.29267e-286	MDSCs	Orm1
Lta4h	3.9478e-286	0.319639	0.435	0.059	7.46291e-282	MDSCs	Lta4h
Ncf1	7.21573e-286	0.730092	0.978	0.464	1.36406e-281	MDSCs	Ncf1
Milr1	1.51273e-281	0.32352	0.733	0.169	2.85967e-277	MDSCs	Milr1
S1pr4	3.20434e-279	0.338029	0.737	0.173	6.05749e-275	MDSCs	S1pr4
Actn1	7.8338e-278	0.622005	0.971	0.373	1.4809e-273	MDSCs	Actn1
Mmp25	8.45957e-276	0.503702	0.91	0.284	1.5992e-271	MDSCs	Mmp25
Clec12a	9.34082e-276	0.471634	0.891	0.266	1.76579e-271	MDSCs	Clec12a
Triobp	1.58058e-272	0.46669	0.879	0.269	2.98793e-268	MDSCs	Triobp
Hk3	3.37722e-272	0.463645	0.901	0.278	6.38429e-268	MDSCs	Hk3
Degs1	1.59736e-267	0.506654	0.913	0.3	3.01964e-263	MDSCs	Degs1
Acap1	3.87605e-267	0.260863	0.607	0.12	7.32729e-263	MDSCs	Acap1
Flot2	1.77083e-259	0.472776	0.921	0.302	3.34757e-255	MDSCs	Flot2
Cd91	7.85381e-257	0.631385	0.989	0.567	1.48468e-252	MDSCs	Cd9
Lbp	2.82828e-252	0.305877	0.607	0.129	5.34658e-248	MDSCs	Lbp
Tecr	1.2766e-251	0.542499	0.941	0.355	2.41329e-247	MDSCs	Tecr
St3gal5	3.37179e-251	0.267136	0.529	0.099	6.37403e-247	MDSCs	St3gal5
Dhrs1	4.516e-247	0.328667	0.782	0.207	8.53704e-243	MDSCs	Dhrs1
Mapk13	4.2255e-244	0.592061	0.982	0.45	7.98789e-240	MDSCs	Mapk13
Me2	5.85698e-242	0.29266	0.681	0.165	1.1072e-237	MDSCs	Me2
Lamtor4	8.29454e-233	0.555999	0.969	0.431	1.568e-228	MDSCs	Lamtor4
Ankrd22	1.15659e-231	0.274444	0.644	0.153	2.18641e-227	MDSCs	Ankrd22
Mgst1	1.07548e-229	0.62446	0.999	0.528	2.03308e-225	MDSCs	Mgst1
Wfdc21	1.38656e-227	0.549264	0.999	0.952	2.62116e-223	MDSCs	Wfdc21
Tmsb10	1.19499e-224	0.732668	0.786	0.282	2.25902e-220	MDSCs	Tmsb10
S100a13	2.86246e-223	0.455333	0.936	0.356	5.41119e-219	MDSCs	S100a13
Ifrd1	2.49794e-221	0.265326	0.68	0.17	4.7221e-217	MDSCs	Ifrd1
Gapdh	4.10529e-221	0.505385	0.999	0.935	7.76064e-217	MDSCs	Gapdh
Lrrk2	1.08478e-218	0.269352	0.612	0.147	2.05068e-214	MDSCs	Lrrk2
Ndufv3	9.23339e-215	0.35764	0.774	0.235	1.74548e-210	MDSCs	Ndufv3
Rpsa	2.02117e-214	0.844959	0.975	0.62	3.82082e-210	MDSCs	Rpsa
Anxa11	2.6611e-214	0.54181	0.989	0.522	5.03055e-210	MDSCs	Anxa11
Flna	2.31797e-212	0.559776	0.989	0.57	4.38189e-208	MDSCs	Flna
Slc31a2	1.68027e-208	0.299617	0.769	0.226	3.17638e-204	MDSCs	Slc31a2
Clec4a2	6.43201e-205	0.42991	0.935	0.367	1.21591e-200	MDSCs	Clec4a2
Rfc2	4.31988e-203	0.260555	0.657	0.172	8.16631e-199	MDSCs	Rfc2
Cib2	1.6761e-199	0.255065	0.674	0.182	3.16849e-195	MDSCs	Cib2
Tmem401	4.74269e-196	0.254876	0.717	0.202	8.96559e-192	MDSCs	Tmem40
Mmp8	2.89146e-190	0.746653	0.937	0.556	5.46601e-186	MDSCs	Mmp8
Ywhab	1.21215e-184	0.416653	0.935	0.391	2.29145e-180	MDSCs	Ywhab
Cep19	4.21892e-179	0.315321	0.794	0.265	7.97545e-175	MDSCs	Cep19
Pgd	6.35118e-174	0.472734	0.994	0.659	1.20063e-169	MDSCs	Pgd
Vasp	1.08766e-173	0.450021	0.994	0.749	2.05611e-169	MDSCs	Vasp
Plbd1	5.45238e-173	0.412283	0.9	0.374	1.03072e-168	MDSCs	Plbd1
Pnkp	3.47598e-172	0.462823	0.981	0.509	6.57099e-168	MDSCs	Pnkp
Sri	1.5286e-170	0.430644	0.996	0.834	2.88966e-166	MDSCs	Sri
Sqor	3.14847e-170	0.371894	0.911	0.363	5.95187e-166	MDSCs	Sqor
Pomp	3.07311e-167	0.361755	0.909	0.36	5.8094e-163	MDSCs	Pomp
Rnf10	3.67033e-165	0.328723	0.872	0.329	6.93839e-161	MDSCs	Rnf10
Ap3s1	6.60367e-165	0.374801	0.916	0.379	1.24836e-160	MDSCs	Ap3s1
Limd2	9.55411e-163	0.443116	0.971	0.492	1.80611e-158	MDSCs	Limd2
Pgk1	5.86752e-162	0.411546	0.968	0.471	1.1092e-157	MDSCs	Pgk1
Npepps	1.49064e-158	0.26156	0.751	0.249	2.8179e-154	MDSCs	Npepps
S100a6	4.25634e-158	0.645398	0.994	0.965	8.04618e-154	MDSCs	S100a6
Cmah	2.90543e-155	0.313142	0.838	0.313	5.49243e-151	MDSCs	Cmah
Itgam	2.85593e-154	0.47768	0.988	0.618	5.39885e-150	MDSCs	Itgam
Ccnd3	3.23233e-153	0.424619	0.993	0.691	6.11039e-149	MDSCs	Ccnd3
Scp2	3.65043e-153	0.487945	0.942	0.493	6.90077e-149	MDSCs	Scp2
Rpl10a	1.33914e-152	0.271685	0.644	0.205	2.5315e-148	MDSCs	Rpl10a
Rps20	4.54723e-151	0.547374	0.962	0.635	8.59609e-147	MDSCs	Rps20
Gsr	2.30246e-148	0.299924	0.913	0.354	4.35257e-144	MDSCs	Gsr
Lasp1	7.1529e-148	0.283401	0.858	0.322	1.35218e-143	MDSCs	Lasp1
Myl61	2.99873e-147	0.302626	0.999	0.973	5.66879e-143	MDSCs	Myl6
Gpi1	5.06738e-147	0.39801	0.998	0.805	9.57937e-143	MDSCs	Gpi1
Sem1	6.39021e-145	0.32367	0.997	0.935	1.20801e-140	MDSCs	Sem1
Ciao2a	4.06259e-144	0.265006	0.82	0.3	7.67992e-140	MDSCs	Ciao2a
Prok2	2.94643e-142	0.560007	0.897	0.437	5.56994e-138	MDSCs	Prok2
Fpr2	9.47016e-142	0.407405	0.98	0.552	1.79024e-137	MDSCs	Fpr2
Sp140	1.02048e-139	0.301594	0.874	0.353	1.92911e-135	MDSCs	Sp140
Sh3bgrl3	1.02409e-138	0.324656	0.998	0.941	1.93595e-134	MDSCs	Sh3bgrl3
Asnsd1	7.57527e-136	0.330887	0.908	0.381	1.43203e-131	MDSCs	Asnsd1
Plaur	3.57833e-133	0.403657	0.991	0.593	6.76448e-129	MDSCs	Plaur
Rps18	1.54642e-132	0.432807	0.921	0.473	2.92335e-128	MDSCs	Rps18
Ndufa1	6.40274e-131	0.329731	0.935	0.442	1.21037e-126	MDSCs	Ndufa1
Prdx5	1.01349e-130	0.303033	0.997	0.975	1.91591e-126	MDSCs	Prdx5
Zdhhc3	1.28895e-130	0.255512	0.795	0.299	2.43663e-126	MDSCs	Zdhhc3
Mmp9	1.3471e-130	0.449403	0.994	0.835	2.54655e-126	MDSCs	Mmp9
Mettl9	4.57466e-124	0.382012	0.991	0.657	8.64794e-120	MDSCs	Mettl9
Rflnb	8.37816e-124	0.36118	0.965	0.479	1.58381e-119	MDSCs	Rflnb
Cd24a	2.80716e-123	0.360685	0.994	0.726	5.30666e-119	MDSCs	Cd24a
Rpl4	3.41706e-123	0.259671	0.821	0.331	6.45961e-119	MDSCs	Rpl4
Atxn10	4.14023e-119	0.395158	0.991	0.611	7.82668e-115	MDSCs	Atxn10
Dbnl	2.84711e-118	0.30932	0.931	0.432	5.38217e-114	MDSCs	Dbnl
Cpne3	6.03491e-117	0.303176	0.765	0.317	1.14084e-112	MDSCs	Cpne3
Hmgn2	1.74049e-116	0.563083	0.966	0.671	3.29022e-112	MDSCs	Hmgn2
Msra	2.84411e-112	0.253959	0.907	0.384	5.37651e-108	MDSCs	Msra
Plp2	5.36179e-111	0.349944	0.983	0.612	1.01359e-106	MDSCs	Plp2
Rps24	1.30756e-109	0.350188	0.992	0.881	2.4718e-105	MDSCs	Rps24
Rplp0	5.3507e-107	0.373676	0.998	0.894	1.0115e-102	MDSCs	Rplp0
Cstdc6	5.32305e-106	0.421349	0.574	0.235	1.00627e-101	MDSCs	Cstdc6
Trem3	1.15783e-104	0.318283	0.985	0.632	2.18876e-100	MDSCs	Trem3
Cyba	5.00608e-102	0.257257	1	0.983	9.46348e-98	MDSCs	Cyba
R3hdm4	2.45041e-101	0.35117	0.987	0.628	4.63225e-97	MDSCs	R3hdm4
Cd52	6.32099e-98	0.254888	1	0.994	1.19492e-93	MDSCs	Cd52
Slc2a31	2.13696e-96	0.287807	0.926	0.451	4.03972e-92	MDSCs	Slc2a3
Rps4x	7.24776e-95	0.368505	0.961	0.616	1.37012e-90	MDSCs	Rps4x
Plscr1	9.27844e-95	0.26952	0.856	0.408	1.754e-90	MDSCs	Plscr1
Esd1	9.53155e-92	0.2815	0.909	0.446	1.80185e-87	MDSCs	Esd
Slfn41	1.10909e-88	0.298606	0.955	0.568	2.09663e-84	MDSCs	Slfn4
Rps19	2.66923e-87	0.341734	0.955	0.625	5.04591e-83	MDSCs	Rps19
Myh91	1.01618e-86	0.323522	0.979	0.604	1.92099e-82	MDSCs	Myh9
Cnn2	1.93398e-85	0.302816	0.992	0.657	3.65599e-81	MDSCs	Cnn2
Ndufb7	2.43476e-83	0.267085	0.953	0.58	4.60267e-79	MDSCs	Ndufb7
Ifitm31	1.12063e-80	0.298507	1	0.939	2.11843e-76	MDSCs	Ifitm3
Actr3	1.34709e-76	0.258867	1	0.859	2.54654e-72	MDSCs	Actr3
Ltb4r1	1.85251e-71	0.272225	0.973	0.664	3.50199e-67	MDSCs	Ltb4r1
Prr13	4.16078e-70	0.299666	0.999	0.845	7.86554e-66	MDSCs	Prr13
Retnlg	3.48867e-69	0.460018	0.997	0.878	6.59499e-65	MDSCs	Retnlg
Pira2	5.32469e-66	0.253638	0.957	0.581	1.00658e-61	MDSCs	Pira2
Pygl	1.85518e-59	0.25134	0.994	0.813	3.50704e-55	MDSCs	Pygl
Cstdc5	7.89424e-36	0.804486	0.915	0.84	1.49233e-31	MDSCs	Cstdc5
Stfa3	6.55572e-31	0.871142	0.573	0.409	1.23929e-26	MDSCs	Stfa3
Stfa2	3.4594e-12	0.365076	0.68	0.569	6.53966e-08	MDSCs	Stfa2
Olfm4	4.74469e-09	1.15003	0.19	0.14	8.96936e-05	MDSCs	Olfm4
Epas11	0	1.36364	0.618	0.035	0	neutrophil progenitors	Epas1
Cldn5	0	1.1326	0.493	0.019	0	neutrophil progenitors	Cldn5
Ramp2	0	1.08636	0.529	0.02	0	neutrophil progenitors	Ramp2
Egfl7	0	1.04298	0.452	0.022	0	neutrophil progenitors	Egfl7
Calcrl	0	0.996996	0.426	0.018	0	neutrophil progenitors	Calcrl
Cd36	0	0.994513	0.412	0.015	0	neutrophil progenitors	Cd36
Adgrf5	0	0.937233	0.438	0.014	0	neutrophil progenitors	Adgrf5
Gpihbp1	0	0.923776	0.397	0.014	0	neutrophil progenitors	Gpihbp1
Igfbp71	0	0.831528	0.379	0.013	0	neutrophil progenitors	Igfbp7
Tmem100	0	0.800044	0.415	0.012	0	neutrophil progenitors	Tmem100
Slco2a11	0	0.771556	0.36	0.01	0	neutrophil progenitors	Slco2a1
Ptprb	0	0.64048	0.294	0.007	0	neutrophil progenitors	Ptprb
Ly6a	3.63323e-303	1.11733	0.482	0.028	6.86826e-299	neutrophil progenitors	Ly6a
Tspan7	1.29606e-302	0.63642	0.327	0.01	2.45007e-298	neutrophil progenitors	Tspan7
Hpgd	1.44874e-302	0.73489	0.357	0.013	2.7387e-298	neutrophil progenitors	Hpgd
Cdh5	3.11788e-299	0.669259	0.331	0.01	5.89404e-295	neutrophil progenitors	Cdh5
Cav1	2.09271e-295	0.588508	0.312	0.009	3.95606e-291	neutrophil progenitors	Cav1
Plvap	1.05374e-280	0.59331	0.272	0.006	1.99198e-276	neutrophil progenitors	Plvap
Cavin21	2.0035e-278	0.484102	0.29	0.008	3.78742e-274	neutrophil progenitors	Cavin2
Myzap	8.94786e-273	0.453876	0.239	0.004	1.6915e-268	neutrophil progenitors	Myzap
Clec14a	3.22836e-270	0.508767	0.268	0.007	6.10289e-266	neutrophil progenitors	Clec14a
Pltp	6.58262e-261	0.581143	0.301	0.01	1.24438e-256	neutrophil progenitors	Pltp
Ace	3.36648e-257	0.755586	0.305	0.011	6.36399e-253	neutrophil progenitors	Ace
Cyyr1	1.67765e-255	0.406739	0.235	0.005	3.17142e-251	neutrophil progenitors	Cyyr1
Crip2	3.8808e-248	0.513401	0.316	0.013	7.33627e-244	neutrophil progenitors	Crip2
Ctla2a1	2.56231e-240	0.741993	0.441	0.03	4.8438e-236	neutrophil progenitors	Ctla2a
Aqp11	5.60711e-237	0.565573	0.294	0.011	1.05997e-232	neutrophil progenitors	Aqp1
Itga1	6.1399e-234	0.420915	0.195	0.003	1.16069e-229	neutrophil progenitors	Itga1
Sparc	3.05647e-233	0.496861	0.294	0.011	5.77796e-229	neutrophil progenitors	Sparc
Foxf1	1.78006e-231	0.388262	0.206	0.004	3.36502e-227	neutrophil progenitors	Foxf1
Arhgap29	1.3088e-222	0.287917	0.158	0.002	2.47416e-218	neutrophil progenitors	Arhgap29
Sox18	1.22525e-219	0.301225	0.202	0.004	2.31622e-215	neutrophil progenitors	Sox18
Tmem176a1	1.11176e-218	0.519678	0.312	0.015	2.10167e-214	neutrophil progenitors	Tmem176a
Cav2	3.44565e-216	0.351697	0.217	0.006	6.51366e-212	neutrophil progenitors	Cav2
Fmo1	4.26352e-216	0.301131	0.191	0.004	8.05975e-212	neutrophil progenitors	Fmo1
Eng	3.78311e-215	0.419246	0.243	0.008	7.15158e-211	neutrophil progenitors	Eng
Esam1	5.57535e-215	0.454195	0.228	0.006	1.05396e-210	neutrophil progenitors	Esam
Stmn2	1.04292e-213	0.370472	0.21	0.005	1.97154e-209	neutrophil progenitors	Stmn2
Dlc1	9.28927e-211	0.282488	0.173	0.003	1.75604e-206	neutrophil progenitors	Dlc1
Tm4sf1	5.30768e-209	0.453505	0.239	0.008	1.00336e-204	neutrophil progenitors	Tm4sf1
Tjp1	1.95523e-207	0.256836	0.188	0.004	3.69617e-203	neutrophil progenitors	Tjp1
Tmem176b	5.13952e-206	0.551665	0.312	0.016	9.71575e-202	neutrophil progenitors	Tmem176b
Arhgef121	1.11001e-204	0.388012	0.25	0.009	2.09836e-200	neutrophil progenitors	Arhgef12
Kdr	3.64996e-203	0.432195	0.217	0.006	6.89988e-199	neutrophil progenitors	Kdr
Flt1	8.77817e-200	0.433104	0.228	0.007	1.65942e-195	neutrophil progenitors	Flt1
Sema3c	9.69629e-200	0.374086	0.188	0.004	1.83299e-195	neutrophil progenitors	Sema3c
Plpp1	8.7431e-194	0.368098	0.18	0.004	1.6528e-189	neutrophil progenitors	Plpp1
Pecam11	2.63691e-192	0.666164	0.353	0.024	4.98482e-188	neutrophil progenitors	Pecam1
Ecscr	6.1031e-191	0.352696	0.199	0.005	1.15373e-186	neutrophil progenitors	Ecscr
Ehd41	6.29482e-186	0.734145	0.397	0.033	1.18997e-181	neutrophil progenitors	Ehd4
Col4a1	1.28792e-181	0.381634	0.195	0.006	2.43468e-177	neutrophil progenitors	Col4a1
Ece1	1.00007e-172	0.331964	0.173	0.004	1.89053e-168	neutrophil progenitors	Ece1
Cd93	1.04543e-170	0.476196	0.221	0.009	1.97628e-166	neutrophil progenitors	Cd93
Emp2	5.42846e-169	0.841051	0.29	0.018	1.0262e-164	neutrophil progenitors	Emp2
Fermt2	6.44749e-167	0.27121	0.158	0.004	1.21883e-162	neutrophil progenitors	Fermt2
Slc43a3	1.44264e-165	0.281804	0.176	0.005	2.72718e-161	neutrophil progenitors	Slc43a3
Acer21	1.77601e-165	0.297361	0.162	0.004	3.35736e-161	neutrophil progenitors	Acer2
Pakap.1	2.60376e-165	0.326691	0.169	0.004	4.92214e-161	neutrophil progenitors	Pakap.1
Clic5	1.1431e-164	0.338959	0.18	0.005	2.16091e-160	neutrophil progenitors	Clic5
Tek	1.76169e-162	0.346478	0.165	0.004	3.3303e-158	neutrophil progenitors	Tek
Dpysl2	4.9409e-162	0.304979	0.195	0.007	9.34028e-158	neutrophil progenitors	Dpysl2
Tspan8	3.65752e-160	0.284314	0.158	0.004	6.91418e-156	neutrophil progenitors	Tspan8
Cyp4b1	5.95692e-160	0.30552	0.158	0.004	1.1261e-155	neutrophil progenitors	Cyp4b1
Scn7a	5.89249e-159	0.460307	0.184	0.006	1.11392e-154	neutrophil progenitors	Scn7a
Heg1	2.83564e-152	0.315257	0.191	0.007	5.36049e-148	neutrophil progenitors	Heg1
Nfib	7.3185e-146	0.287691	0.176	0.006	1.38349e-141	neutrophil progenitors	Nfib
S1pr1	1.05475e-141	0.330632	0.176	0.007	1.9939e-137	neutrophil progenitors	S1pr1
Rasgef1a	2.33061e-140	0.261566	0.132	0.003	4.40578e-136	neutrophil progenitors	Rasgef1a
Sema3f	8.09371e-140	0.34758	0.147	0.004	1.53003e-135	neutrophil progenitors	Sema3f
2022-09-04	3.24868e-139	0.254785	0.165	0.006	6.14131e-135	neutrophil progenitors	2022-09-04
Efnb2	2.16931e-137	0.264469	0.129	0.003	4.10086e-133	neutrophil progenitors	Efnb2
Gimap1	3.75898e-137	0.271857	0.151	0.005	7.10598e-133	neutrophil progenitors	Gimap1
Ly6c1	2.89308e-135	1.15589	0.559	0.105	5.46908e-131	neutrophil progenitors	Ly6c1
Col4a2	5.32324e-135	0.311172	0.184	0.008	1.00631e-130	neutrophil progenitors	Col4a2
Gng111	7.62369e-134	0.276099	0.25	0.017	1.44118e-129	neutrophil progenitors	Gng11
Id3	4.75936e-130	0.491761	0.276	0.022	8.99709e-126	neutrophil progenitors	Id3
Igfbp4	5.39199e-130	0.399706	0.162	0.006	1.0193e-125	neutrophil progenitors	Igfbp4
Cavin11	1.47755e-129	0.292554	0.173	0.007	2.79317e-125	neutrophil progenitors	Cavin1
Pmp221	7.66258e-128	0.275631	0.129	0.003	1.44853e-123	neutrophil progenitors	Pmp22
Sptbn11	1.60905e-125	1.02082	0.522	0.096	3.04174e-121	neutrophil progenitors	Sptbn1
S100a16	2.11482e-125	0.262204	0.14	0.004	3.99786e-121	neutrophil progenitors	S100a16
Acvrl1	5.56802e-125	0.489271	0.29	0.026	1.05258e-120	neutrophil progenitors	Acvrl1
Gstm1	1.10228e-124	0.37611	0.221	0.014	2.08374e-120	neutrophil progenitors	Gstm1
Kitl	1.14372e-123	0.271407	0.129	0.004	2.16208e-119	neutrophil progenitors	Kitl
Slc9a3r2	1.44814e-114	0.536473	0.32	0.036	2.73757e-110	neutrophil progenitors	Slc9a3r2
Podxl	5.88145e-112	0.282129	0.14	0.005	1.11183e-107	neutrophil progenitors	Podxl
Slc25a4	9.66606e-108	0.255946	0.169	0.009	1.82727e-103	neutrophil progenitors	Slc25a4
Clic41	2.19004e-103	0.45013	0.298	0.033	4.14005e-99	neutrophil progenitors	Clic4
Clec1a	7.70596e-99	0.5409	0.257	0.026	1.45673e-94	neutrophil progenitors	Clec1a
Ddah2	6.33127e-98	0.279354	0.184	0.013	1.19686e-93	neutrophil progenitors	Ddah2
Thbd	8.48131e-97	0.379542	0.206	0.016	1.60331e-92	neutrophil progenitors	Thbd
Icam2	1.22367e-96	0.422714	0.25	0.025	2.31322e-92	neutrophil progenitors	Icam2
Fendrr	5.04506e-96	0.316055	0.114	0.004	9.53719e-92	neutrophil progenitors	Fendrr
Gbp4	1.36737e-90	0.278326	0.18	0.013	2.58488e-86	neutrophil progenitors	Gbp4
Fkbp1a1	3.09117e-89	0.568056	0.364	0.058	5.84355e-85	neutrophil progenitors	Fkbp1a
Car4	2.40062e-87	0.297857	0.18	0.014	4.53813e-83	neutrophil progenitors	Car4
Rbpms	8.98543e-87	0.258079	0.136	0.007	1.69861e-82	neutrophil progenitors	Rbpms
Ccnd1	2.84484e-72	0.377328	0.173	0.016	5.37789e-68	neutrophil progenitors	Ccnd1
Crip11	3.82168e-68	0.819728	0.39	0.086	7.2245e-64	neutrophil progenitors	Crip1
Selenow1	4.71734e-68	0.294923	0.21	0.025	8.91766e-64	neutrophil progenitors	Selenow
BC028528	8.63629e-57	0.552366	0.276	0.053	1.6326e-52	neutrophil progenitors	BC028528
Tcf4	1.32662e-55	0.472712	0.268	0.049	2.50785e-51	neutrophil progenitors	Tcf4
Bmpr2	3.09788e-54	0.631423	0.467	0.143	5.85624e-50	neutrophil progenitors	Bmpr2
S100a101	1.39623e-50	0.319208	0.206	0.032	2.63943e-46	neutrophil progenitors	S100a10
Ccdc85b	1.89375e-49	0.327092	0.257	0.05	3.57995e-45	neutrophil progenitors	Ccdc85b
H2-Ab1	3.37172e-49	0.53094	0.224	0.039	6.37391e-45	neutrophil progenitors	H2-Ab1
AW112010	3.47646e-40	0.300504	0.147	0.021	6.5719e-36	neutrophil progenitors	AW112010
Cd74	6.43981e-35	0.857574	0.327	0.101	1.21738e-30	neutrophil progenitors	Cd74
mt-Nd21	1.50358e-32	0.699052	0.805	0.591	2.84237e-28	neutrophil progenitors	mt-Nd2
Ets1	1.66164e-32	0.311753	0.243	0.062	3.14116e-28	neutrophil progenitors	Ets1
Inmt	8.95785e-31	0.449098	0.114	0.016	1.69339e-26	neutrophil progenitors	Inmt
Ktn1	1.66746e-30	0.259878	0.162	0.031	3.15217e-26	neutrophil progenitors	Ktn1
Gpx3	5.36682e-30	0.266545	0.107	0.015	1.01454e-25	neutrophil progenitors	Gpx3
H2-Eb1	3.97144e-29	0.330046	0.147	0.028	7.50761e-25	neutrophil progenitors	H2-Eb1
mt-Cytb1	9.0494e-27	0.575573	0.949	0.896	1.7107e-22	neutrophil progenitors	mt-Cytb
Jup	2.04541e-25	0.282647	0.213	0.061	3.86664e-21	neutrophil progenitors	Jup
Tns1	8.57121e-25	0.253512	0.232	0.066	1.6203e-20	neutrophil progenitors	Tns1
mt-Atp61	1.4862e-24	0.480881	0.993	0.989	2.80952e-20	neutrophil progenitors	mt-Atp6
Ahnak	2.02046e-24	0.316436	0.25	0.077	3.81947e-20	neutrophil progenitors	Ahnak
Bst21	4.85603e-23	0.283142	0.217	0.063	9.17983e-19	neutrophil progenitors	Bst2
Rpl3	1.03381e-22	0.519986	0.46	0.23	1.95432e-18	neutrophil progenitors	Rpl3
mt-Nd41	9.17737e-22	0.460538	0.904	0.81	1.73489e-17	neutrophil progenitors	mt-Nd4
mt-Nd3	1.05426e-21	0.448369	0.471	0.236	1.99298e-17	neutrophil progenitors	mt-Nd3
Ybx11	2.00314e-21	0.547842	0.732	0.552	3.78674e-17	neutrophil progenitors	Ybx1
H2-K11	3.93087e-21	0.479903	0.857	0.695	7.43091e-17	neutrophil progenitors	H2-K1
mt-Nd1	1.66465e-20	0.531036	0.757	0.595	3.14685e-16	neutrophil progenitors	mt-Nd1
Cyb5r3	3.12292e-19	0.329468	0.294	0.116	5.90357e-15	neutrophil progenitors	Cyb5r3
Krtcap2	4.74768e-19	0.25913	0.213	0.069	8.97502e-15	neutrophil progenitors	Krtcap2
Selenop	5.98571e-19	0.29175	0.342	0.149	1.13154e-14	neutrophil progenitors	Selenop
Hsp90ab11	1.38055e-18	0.468387	0.522	0.311	2.60979e-14	neutrophil progenitors	Hsp90ab1
mt-Co2	2.62506e-18	0.355215	0.996	0.988	4.9624e-14	neutrophil progenitors	mt-Co2
mt-Co31	3.78196e-18	0.351236	0.996	0.989	7.14943e-14	neutrophil progenitors	mt-Co3
mt-Nd4l	4.75956e-18	0.362904	0.349	0.159	8.99748e-14	neutrophil progenitors	mt-Nd4l
Clec2d1	1.83329e-17	0.445432	0.585	0.376	3.46565e-13	neutrophil progenitors	Clec2d
Rpl131	4.40974e-17	0.425971	0.89	0.796	8.33617e-13	neutrophil progenitors	Rpl13
Ptma1	1.34597e-16	0.384782	0.868	0.65	2.54441e-12	neutrophil progenitors	Ptma
Hsp90b1	1.49755e-16	0.274748	0.309	0.133	2.83097e-12	neutrophil progenitors	Hsp90b1
Rpl36a	2.75584e-16	0.405987	0.529	0.323	5.20965e-12	neutrophil progenitors	Rpl36a
Rps201	6.16966e-16	0.444618	0.824	0.669	1.16631e-11	neutrophil progenitors	Rps20
Tmsb101	1.20308e-15	0.472674	0.54	0.335	2.2743e-11	neutrophil progenitors	Tmsb10
Cyb5a1	2.94411e-15	0.310258	0.364	0.189	5.56554e-11	neutrophil progenitors	Cyb5a
H2-Aa	5.84518e-14	0.353434	0.143	0.045	1.10497e-09	neutrophil progenitors	H2-Aa
Macf1	8.03778e-14	0.33963	0.29	0.14	1.51946e-09	neutrophil progenitors	Macf1
Rpl10a1	9.90719e-14	0.421246	0.434	0.251	1.87285e-09	neutrophil progenitors	Rpl10a
Ly6e1	2.11449e-13	0.370639	0.449	0.261	3.99722e-09	neutrophil progenitors	Ly6e
Ppia2	2.88452e-13	0.339716	0.768	0.622	5.4529e-09	neutrophil progenitors	Ppia
Eef1a1	1.01358e-12	0.30239	0.941	0.889	1.91607e-08	neutrophil progenitors	Eef1a1
Rps81	1.49911e-12	0.340107	0.879	0.767	2.83392e-08	neutrophil progenitors	Rps8
Rpl35	4.65806e-12	0.386189	0.676	0.52	8.80561e-08	neutrophil progenitors	Rpl35
Guk1	3.01415e-11	0.28567	0.265	0.133	5.69794e-07	neutrophil progenitors	Guk1
Rpl141	6.20763e-11	0.363124	0.526	0.351	1.17349e-06	neutrophil progenitors	Rpl14
Ptms	1.01965e-10	0.338977	0.426	0.257	1.92754e-06	neutrophil progenitors	Ptms
Rpl381	1.20559e-10	0.25368	0.934	0.875	2.27905e-06	neutrophil progenitors	Rpl38
Pitpnc1	4.30759e-09	0.277615	0.268	0.149	8.14306e-05	neutrophil progenitors	Pitpnc1
Rps181	4.42779e-09	0.37911	0.673	0.521	8.37029e-05	neutrophil progenitors	Rps18
Rpl12	7.39317e-09	0.315784	0.482	0.33	0.000139761	neutrophil progenitors	Rpl12
Rps4x1	8.34717e-09	0.332205	0.776	0.653	0.000157795	neutrophil progenitors	Rps4x
Rplp11	9.04919e-09	0.336703	0.923	0.863	0.000171066	neutrophil progenitors	Rplp1
Hopx1	1.29365e-08	0.283275	0.445	0.309	0.000244551	neutrophil progenitors	Hopx
Hnrnpa3	1.36695e-08	0.299481	0.404	0.269	0.000258407	neutrophil progenitors	Hnrnpa3
Itgb12	1.59483e-08	0.25516	0.305	0.174	0.000301487	neutrophil progenitors	Itgb1
Smarca2	2.34047e-08	0.250535	0.309	0.183	0.000442443	neutrophil progenitors	Smarca2
Ndufa42	5.67788e-08	0.283257	0.518	0.38	0.00107335	neutrophil progenitors	Ndufa4
Rpl221	9.02884e-08	0.270993	0.721	0.593	0.00170681	neutrophil progenitors	Rpl22
Rack1	8.7404e-07	0.283087	0.684	0.57	0.0165228	neutrophil progenitors	Rack1
Rpl36al1	1.31701e-06	0.271077	0.32	0.206	0.0248967	neutrophil progenitors	Rpl36al
Rpl321	2.15802e-06	0.316211	0.732	0.653	0.0407952	neutrophil progenitors	Rpl32
Rpl361	4.49376e-06	0.256574	0.765	0.689	0.08495	neutrophil progenitors	Rpl36
Rps281	9.01621e-06	0.2876	0.805	0.705	0.170443	neutrophil progenitors	Rps28
Rpl42	0.000300961	0.262202	0.467	0.386	1	neutrophil progenitors	Rpl4
Retnlg1	0	1.1879	1	0.866	0	pro-tumor neutrophils	Retnlg
Prok21	0	1.18241	0.935	0.384	0	pro-tumor neutrophils	Prok2
Mmp81	0	0.891874	0.976	0.511	0	pro-tumor neutrophils	Mmp8
S100a61	0	0.859553	0.997	0.962	0	pro-tumor neutrophils	S100a6
Ifitm61	0	0.70543	0.969	0.565	0	pro-tumor neutrophils	Ifitm6
Wfdc17	0	0.684956	1	0.993	0	pro-tumor neutrophils	Wfdc17
Ly6g1	0	0.575559	0.893	0.325	0	pro-tumor neutrophils	Ly6g
Gapdh1	0	0.55862	0.999	0.929	0	pro-tumor neutrophils	Gapdh
Wfdc211	0	0.552062	0.999	0.947	0	pro-tumor neutrophils	Wfdc21
Alox5ap	0	0.509916	1	0.991	0	pro-tumor neutrophils	Alox5ap
S100a11	0	0.362512	0.999	0.998	0	pro-tumor neutrophils	S100a11
Ggt11	3.96593e-298	0.528451	0.576	0.15	7.49719e-294	pro-tumor neutrophils	Ggt1
S100a81	1.27521e-297	0.54409	1	0.999	2.41066e-293	pro-tumor neutrophils	S100a8
Cd1771	7.05683e-275	0.523236	0.848	0.309	1.33402e-270	pro-tumor neutrophils	Cd177
Mgst11	1.79291e-248	0.594704	0.946	0.496	3.38932e-244	pro-tumor neutrophils	Mgst1
Tspo	2.86511e-241	0.370868	0.999	0.973	5.41621e-237	pro-tumor neutrophils	Tspo
Actn11	7.24346e-228	0.458772	0.832	0.35	1.3693e-223	pro-tumor neutrophils	Actn1
Atxn101	6.38326e-227	0.505774	0.969	0.581	1.20669e-222	pro-tumor neutrophils	Atxn10
Esd2	6.5724e-223	0.520232	0.846	0.418	1.24245e-218	pro-tumor neutrophils	Esd
Lcn21	1.62695e-220	0.41865	0.997	0.82	3.07558e-216	pro-tumor neutrophils	Lcn2
Prr131	2.51165e-216	0.46957	0.995	0.831	4.74803e-212	pro-tumor neutrophils	Prr13
Gclm1	6.40252e-216	0.529827	0.739	0.323	1.21033e-211	pro-tumor neutrophils	Gclm
Timp2	8.00261e-204	0.458533	0.877	0.448	1.51281e-199	pro-tumor neutrophils	Timp2
Gyg	3.69184e-201	0.460006	0.877	0.45	6.97905e-197	pro-tumor neutrophils	Gyg
Asnsd11	3.7059e-193	0.439972	0.79	0.36	7.00563e-189	pro-tumor neutrophils	Asnsd1
Adpgk1	4.09168e-190	0.312876	0.665	0.228	7.73491e-186	pro-tumor neutrophils	Adpgk
Mov10	8.56622e-187	0.347685	0.518	0.172	1.61936e-182	pro-tumor neutrophils	Mov10
Rplp01	1.69684e-186	0.477136	0.994	0.885	3.20771e-182	pro-tumor neutrophils	Rplp0
Aldh22	6.77105e-180	0.354816	0.861	0.396	1.28e-175	pro-tumor neutrophils	Aldh2
Glrx	2.65504e-179	0.420338	0.987	0.739	5.01909e-175	pro-tumor neutrophils	Glrx
Rdh12	1.52399e-175	0.376475	0.696	0.299	2.88096e-171	pro-tumor neutrophils	Rdh12
Anxa12	3.14153e-168	0.285362	0.999	0.944	5.93876e-164	pro-tumor neutrophils	Anxa1
Lyz21	3.736e-168	0.291177	0.993	0.777	7.06254e-164	pro-tumor neutrophils	Lyz2
Lgals31	6.39859e-167	0.401326	0.975	0.632	1.20959e-162	pro-tumor neutrophils	Lgals3
R3hdm41	7.88587e-163	0.4126	0.963	0.6	1.49074e-158	pro-tumor neutrophils	R3hdm4
Zdhhc31	4.8783e-161	0.338642	0.663	0.284	9.22194e-157	pro-tumor neutrophils	Zdhhc3
Ceacam101	5.12465e-161	0.385621	0.633	0.253	9.68763e-157	pro-tumor neutrophils	Ceacam10
Padi41	5.75199e-159	0.308359	0.565	0.215	1.08736e-154	pro-tumor neutrophils	Padi4
Tkt1	3.03137e-157	0.399545	0.963	0.568	5.73051e-153	pro-tumor neutrophils	Tkt
Mapk131	5.14091e-150	0.376813	0.853	0.431	9.71837e-146	pro-tumor neutrophils	Mapk13
Glipr2	2.73789e-145	0.366194	0.971	0.631	5.1757e-141	pro-tumor neutrophils	Glipr2
Anxa111	1.09075e-141	0.376798	0.897	0.5	2.06195e-137	pro-tumor neutrophils	Anxa11
Prdx51	1.49805e-138	0.29218	0.999	0.973	2.83192e-134	pro-tumor neutrophils	Prdx5
Mmp251	1.31393e-136	0.314437	0.653	0.287	2.48386e-132	pro-tumor neutrophils	Mmp25
Flot21	1.46269e-136	0.284803	0.684	0.301	2.76507e-132	pro-tumor neutrophils	Flot2
Pnkp1	1.01841e-135	0.354098	0.892	0.487	1.92519e-131	pro-tumor neutrophils	Pnkp
Ifitm32	6.54245e-134	0.344978	1	0.933	1.23679e-129	pro-tumor neutrophils	Ifitm3
Cstdc61	3.94227e-132	0.320028	0.532	0.214	7.45248e-128	pro-tumor neutrophils	Cstdc6
S100a91	3.88336e-129	0.262551	1	1	7.3411e-125	pro-tumor neutrophils	S100a9
Gsr1	2.25547e-127	0.299832	0.722	0.348	4.26374e-123	pro-tumor neutrophils	Gsr
Dbi	4.71502e-126	0.444943	0.775	0.437	8.91327e-122	pro-tumor neutrophils	Dbi
Msra1	1.924e-125	0.299528	0.75	0.373	3.63713e-121	pro-tumor neutrophils	Msra
Cmas	9.54727e-124	0.276907	0.505	0.212	1.80482e-119	pro-tumor neutrophils	Cmas
G6pdx1	7.22205e-117	0.300984	0.806	0.405	1.36526e-112	pro-tumor neutrophils	G6pdx
Lipg1	1.57622e-116	0.315468	0.416	0.16	2.97968e-112	pro-tumor neutrophils	Lipg
Snai1	2.15116e-112	0.297466	0.411	0.158	4.06656e-108	pro-tumor neutrophils	Snai1
Cstdc51	7.21622e-111	0.742807	0.933	0.828	1.36415e-106	pro-tumor neutrophils	Cstdc5
Rps241	2.27277e-103	0.328768	0.988	0.872	4.29645e-99	pro-tumor neutrophils	Rps24
Stfa21	1.69896e-100	0.871446	0.747	0.542	3.21171e-96	pro-tumor neutrophils	Stfa2
Hopx2	2.57068e-100	0.251488	0.561	0.253	4.85961e-96	pro-tumor neutrophils	Hopx
Pglyrp11	2.85448e-95	0.25776	0.999	0.943	5.39611e-91	pro-tumor neutrophils	Pglyrp1
Rflnb1	5.17961e-95	0.283265	0.822	0.467	9.79154e-91	pro-tumor neutrophils	Rflnb
Vasp1	4.06629e-94	0.284616	0.976	0.731	7.68692e-90	pro-tumor neutrophils	Vasp
Ifitm1	5.54292e-94	0.322466	0.995	0.982	1.04783e-89	pro-tumor neutrophils	Ifitm1
Mmp91	6.34844e-92	0.296518	0.99	0.821	1.20011e-87	pro-tumor neutrophils	Mmp9
Plp21	1.26485e-90	0.285958	0.913	0.593	2.39107e-86	pro-tumor neutrophils	Plp2
Stfa31	7.84104e-90	0.866528	0.601	0.387	1.48227e-85	pro-tumor neutrophils	Stfa3
Pygl1	1.87105e-87	0.261905	0.99	0.798	3.53704e-83	pro-tumor neutrophils	Pygl
Pgd1	8.22146e-76	0.255971	0.938	0.641	1.55418e-71	pro-tumor neutrophils	Pgd
Cstdc4	1.14926e-62	0.69767	0.791	0.664	2.17257e-58	pro-tumor neutrophils	Cstdc4
Rpsa1	1.72564e-52	0.295908	0.868	0.612	3.26215e-48	pro-tumor neutrophils	Rpsa
Asprv1	3.12679e-49	0.298848	0.884	0.754	5.91088e-45	pro-tumor neutrophils	Asprv1
Wfdc171	3.64561e-114	0.410232	1	0.993	6.89167e-110	transitional neutrophils	Wfdc17
Ccl6	7.48801e-82	0.514028	0.814	0.63	1.41553e-77	transitional neutrophils	Ccl6
Cpd	4.40768e-50	0.297268	0.788	0.66	8.33229e-46	transitional neutrophils	Cpd
Smpdl3a	1.53076e-31	0.251741	0.784	0.716	2.89375e-27	transitional neutrophils	Smpdl3a
Stfa2l1	9.13684e-25	0.297833	0.852	0.808	1.72723e-20	transitional neutrophils	Stfa2l1

## Sheet: neut.subclusters.freq
	np	saline
chemotactic neutrophils	0.00381801	0.00250268
IFN-associated neutrophils	0.435571	0.0466571
mature neutrophils	0.162902	0.345906
MDSCs	0.122494	0.115838
neutrophil progenitors	0.0486796	0.0212728
pro-tumor neutrophils	0.128858	0.230604
transitional neutrophils	0.0976774	0.237218

## Sheet: mon.markers
	p_val	avg_logFC	pct.1	pct.2	p_val_adj	cluster	gene
Steap4	2.28757e-219	1.00233	0.92	0.033	4.32443e-215	basophils/eosinophils	Steap4
Slc40a1	4.70659e-215	0.654228	0.77	0.016	8.89734e-211	basophils/eosinophils	Slc40a1
Chil1	1.50368e-193	0.951823	0.793	0.025	2.84256e-189	basophils/eosinophils	Chil1
Mrgpra2b	3.15322e-175	0.611315	0.575	0.008	5.96085e-171	basophils/eosinophils	Mrgpra2b
Cxcr2	1.19292e-174	1.48513	0.954	0.062	2.2551e-170	basophils/eosinophils	Cxcr2
Mmp9	3.98138e-174	0.974181	0.805	0.034	7.52639e-170	basophils/eosinophils	Mmp9
Stfa2l1	2.39239e-143	1.96711	0.839	0.058	4.52257e-139	basophils/eosinophils	Stfa2l1
Asprv1	2.68846e-133	1.3	0.736	0.044	5.08227e-129	basophils/eosinophils	Asprv1
Il1f9	1.33027e-129	0.483967	0.69	0.035	2.51474e-125	basophils/eosinophils	Il1f9
Acod1	1.58634e-99	0.619692	0.575	0.033	2.99883e-95	basophils/eosinophils	Acod1
Mirt2	7.30006e-98	0.385243	0.632	0.044	1.38e-93	basophils/eosinophils	Mirt2
Hdc	1.34909e-97	1.45488	1	0.198	2.55031e-93	basophils/eosinophils	Hdc
Slc2a3	5.61402e-97	0.3576	0.471	0.02	1.06127e-92	basophils/eosinophils	Slc2a3
Prok2	1.58929e-84	0.6542	0.425	0.019	3.0044e-80	basophils/eosinophils	Prok2
Ankrd33b	2.55842e-82	0.40819	0.655	0.06	4.83643e-78	basophils/eosinophils	Ankrd33b
Stfa2	3.12537e-75	1.57842	0.529	0.043	5.90821e-71	basophils/eosinophils	Stfa2
Csf1	2.69016e-71	0.449397	0.437	0.027	5.08548e-67	basophils/eosinophils	Csf1
Cstdc4	3.30942e-60	2.00254	0.678	0.113	6.25613e-56	basophils/eosinophils	Cstdc4
Ifitm1	1.38443e-59	2.66365	1	0.514	2.61712e-55	basophils/eosinophils	Ifitm1
Fpr1	2.06249e-59	0.316818	0.483	0.043	3.89894e-55	basophils/eosinophils	Fpr1
Pglyrp1	3.36643e-59	1.09037	0.977	0.282	6.3639e-55	basophils/eosinophils	Pglyrp1
G0s2	2.29682e-58	2.0502	0.77	0.164	4.34191e-54	basophils/eosinophils	G0s2
Actn1	3.45116e-57	0.305636	0.333	0.019	6.52407e-53	basophils/eosinophils	Actn1
Retnlg	8.66753e-56	2.75522	0.862	0.241	1.63851e-51	basophils/eosinophils	Retnlg
S100a9	7.17623e-54	3.34053	1	0.975	1.3566e-49	basophils/eosinophils	S100a9
Ly6g	3.28919e-52	0.424397	0.31	0.019	6.21788e-48	basophils/eosinophils	Ly6g
Csf3r	2.34004e-49	1.11703	1	0.838	4.42361e-45	basophils/eosinophils	Csf3r
Grina	9.59123e-48	0.973866	1	0.861	1.81313e-43	basophils/eosinophils	Grina
S100a8	5.53849e-47	2.6443	1	0.969	1.047e-42	basophils/eosinophils	S100a8
Mxd1	2.04848e-46	1.13116	1	0.6	3.87244e-42	basophils/eosinophils	Mxd1
Rdh12	2.61344e-44	0.268917	0.379	0.037	4.94044e-40	basophils/eosinophils	Rdh12
Cstdc5	1.55745e-40	2.57059	0.805	0.28	2.94419e-36	basophils/eosinophils	Cstdc5
Upp1	2.63627e-40	0.57925	0.586	0.108	4.98361e-36	basophils/eosinophils	Upp1
Slfn4	1.34235e-39	0.55551	0.644	0.129	2.53757e-35	basophils/eosinophils	Slfn4
Il1r2	2.2324e-37	0.452307	0.644	0.141	4.22012e-33	basophils/eosinophils	Il1r2
Wfdc21	7.14163e-37	1.29983	0.977	0.476	1.35005e-32	basophils/eosinophils	Wfdc21
Rflnb	7.29174e-36	0.418098	0.506	0.089	1.37843e-31	basophils/eosinophils	Rflnb
Stfa3	1.34093e-35	1.00732	0.391	0.053	2.53489e-31	basophils/eosinophils	Stfa3
Trem1	1.10212e-34	0.730023	0.943	0.441	2.08344e-30	basophils/eosinophils	Trem1
Map1lc3b	1.21598e-34	0.572513	1	0.981	2.29869e-30	basophils/eosinophils	Map1lc3b
Lcn2	2.213e-34	1.33102	0.908	0.395	4.18345e-30	basophils/eosinophils	Lcn2
Il1b	3.01145e-34	1.08607	1	0.901	5.69285e-30	basophils/eosinophils	Il1b
Lrg1	1.05209e-32	0.979961	0.989	0.568	1.98887e-28	basophils/eosinophils	Lrg1
Wfdc17	1.8488e-32	1.09674	1	0.998	3.49496e-28	basophils/eosinophils	Wfdc17
Nudt4	2.27067e-32	0.560098	0.92	0.485	4.29247e-28	basophils/eosinophils	Nudt4
Selplg	8.31263e-30	0.589694	1	0.94	1.57142e-25	basophils/eosinophils	Selplg
Clec4d	2.72861e-29	0.50356	0.874	0.362	5.15817e-25	basophils/eosinophils	Clec4d
Igfbp6	5.65638e-29	0.826356	0.92	0.457	1.06928e-24	basophils/eosinophils	Igfbp6
Srgn	1.91536e-28	0.54085	1	1	3.62081e-24	basophils/eosinophils	Srgn
Cd84	2.72894e-28	0.676747	0.92	0.487	5.1588e-24	basophils/eosinophils	Cd84
Cpd	3.36661e-28	0.475365	0.759	0.24	6.36424e-24	basophils/eosinophils	Cpd
Mapk13	4.18697e-28	0.293707	0.552	0.128	7.91505e-24	basophils/eosinophils	Mapk13
Adam19	7.2908e-28	0.260273	0.483	0.099	1.37825e-23	basophils/eosinophils	Adam19
Iqsec1	1.78882e-27	0.330967	0.655	0.177	3.38158e-23	basophils/eosinophils	Iqsec1
Cd300lf	1.24568e-26	0.627669	0.943	0.595	2.35484e-22	basophils/eosinophils	Cd300lf
Siglece	2.19942e-26	0.430539	0.793	0.293	4.15779e-22	basophils/eosinophils	Siglece
Cd24a	9.75315e-26	0.446573	0.736	0.239	1.84374e-21	basophils/eosinophils	Cd24a
C5ar1	2.02002e-25	0.576149	0.954	0.575	3.81864e-21	basophils/eosinophils	C5ar1
Gadd45a	2.24207e-25	0.500629	0.701	0.232	4.23841e-21	basophils/eosinophils	Gadd45a
Ccr1	3.2939e-25	0.600819	0.989	0.609	6.22678e-21	basophils/eosinophils	Ccr1
Egr3	4.84553e-24	0.259478	0.31	0.047	9.15999e-20	basophils/eosinophils	Egr3
Cd33	3.96935e-23	0.485105	0.931	0.425	7.50365e-19	basophils/eosinophils	Cd33
Sorl1	8.09615e-23	0.473085	1	0.83	1.5305e-18	basophils/eosinophils	Sorl1
Adam8	6.29301e-22	0.364376	0.736	0.276	1.18963e-17	basophils/eosinophils	Adam8
Mcl1	7.36263e-22	0.376079	1	0.999	1.39183e-17	basophils/eosinophils	Mcl1
Lmnb1	7.78328e-22	0.404821	0.816	0.36	1.47135e-17	basophils/eosinophils	Lmnb1
Lilr4b	1.16669e-21	0.528704	0.966	0.789	2.2055e-17	basophils/eosinophils	Lilr4b
Arg2	3.28721e-21	0.468027	0.943	0.533	6.21415e-17	basophils/eosinophils	Arg2
Zyx	1.9371e-20	0.42408	0.989	0.975	3.6619e-16	basophils/eosinophils	Zyx
Fam122a	1.97493e-20	0.265819	0.655	0.217	3.73341e-16	basophils/eosinophils	Fam122a
Ctsd	2.07257e-20	0.525231	1	0.922	3.91798e-16	basophils/eosinophils	Ctsd
Sntb2	3.14383e-20	0.339573	0.759	0.294	5.94309e-16	basophils/eosinophils	Sntb2
S100a11	4.05062e-20	0.460426	1	0.997	7.65729e-16	basophils/eosinophils	S100a11
Hist1h2bc	5.49708e-19	0.598334	0.759	0.316	1.03917e-14	basophils/eosinophils	Hist1h2bc
Litaf	8.81649e-19	0.413334	0.989	0.847	1.66667e-14	basophils/eosinophils	Litaf
Ccpg1	1.25854e-18	0.422696	0.943	0.643	2.37915e-14	basophils/eosinophils	Ccpg1
Clec4e	2.06917e-18	0.527845	0.977	0.725	3.91156e-14	basophils/eosinophils	Clec4e
Ypel3	3.40582e-18	0.406217	1	0.86	6.43837e-14	basophils/eosinophils	Ypel3
Cxcl2	1.21263e-17	1.25135	0.77	0.396	2.29235e-13	basophils/eosinophils	Cxcl2
Stk17b	1.24156e-17	0.377409	1	0.975	2.34704e-13	basophils/eosinophils	Stk17b
Rac2	2.45027e-17	0.38935	1	0.989	4.63198e-13	basophils/eosinophils	Rac2
2022-03-07	5.16341e-17	0.359142	0.954	0.645	9.76092e-13	basophils/eosinophils	2022-03-07
Cebpd	6.52388e-17	0.477337	1	0.889	1.23327e-12	basophils/eosinophils	Cebpd
Pnrc1	8.15661e-17	0.424223	0.989	0.873	1.54193e-12	basophils/eosinophils	Pnrc1
Igf1r	9.57996e-17	0.269001	0.621	0.219	1.811e-12	basophils/eosinophils	Igf1r
Resf1	1.25944e-16	0.560684	0.92	0.621	2.38085e-12	basophils/eosinophils	Resf1
Cyp4f18	1.34802e-16	0.426663	0.747	0.34	2.54829e-12	basophils/eosinophils	Cyp4f18
Hmgb2	8.22288e-16	0.312645	1	0.989	1.55445e-11	basophils/eosinophils	Hmgb2
Slfn1	1.08297e-15	0.470677	0.954	0.655	2.04725e-11	basophils/eosinophils	Slfn1
Ppp1r3b	1.91977e-15	0.281225	0.575	0.208	3.62912e-11	basophils/eosinophils	Ppp1r3b
Ifitm2	2.39178e-15	0.29062	1	1	4.52142e-11	basophils/eosinophils	Ifitm2
Gcnt2	3.64692e-15	0.401651	0.977	0.717	6.89413e-11	basophils/eosinophils	Gcnt2
Txn1	4.10933e-15	0.395343	1	0.998	7.76828e-11	basophils/eosinophils	Txn1
Ube2b	5.28652e-15	0.33409	1	0.909	9.99363e-11	basophils/eosinophils	Ube2b
Neat1	6.9005e-15	0.473134	1	0.962	1.30447e-10	basophils/eosinophils	Neat1
Malat1	7.34072e-15	0.419296	1	0.999	1.38769e-10	basophils/eosinophils	Malat1
Socs3	1.55192e-14	0.482182	0.954	0.739	2.93374e-10	basophils/eosinophils	Socs3
Hp	6.272e-14	0.363806	1	0.978	1.18566e-09	basophils/eosinophils	Hp
Sh2d3c	1.1267e-13	0.250746	0.529	0.203	2.12991e-09	basophils/eosinophils	Sh2d3c
Slc16a3	1.24548e-13	0.359957	0.851	0.519	2.35446e-09	basophils/eosinophils	Slc16a3
Marcks	1.34808e-13	0.425718	0.977	0.828	2.54842e-09	basophils/eosinophils	Marcks
Tnfaip2	1.60045e-13	0.51831	0.989	0.871	3.0255e-09	basophils/eosinophils	Tnfaip2
Junb	1.61221e-13	0.36119	1	0.999	3.04772e-09	basophils/eosinophils	Junb
Mir142hg	1.78223e-13	0.254543	0.747	0.347	3.36913e-09	basophils/eosinophils	Mir142hg
Pygl	1.93469e-13	0.388733	0.943	0.73	3.65734e-09	basophils/eosinophils	Pygl
Adipor1	2.76202e-13	0.323324	0.966	0.893	5.22132e-09	basophils/eosinophils	Adipor1
Fbxl5	3.0422e-13	0.360076	0.92	0.746	5.75098e-09	basophils/eosinophils	Fbxl5
Ube2h	6.64923e-13	0.3382	0.839	0.513	1.25697e-08	basophils/eosinophils	Ube2h
Lyst	7.12515e-13	0.340799	0.897	0.515	1.34694e-08	basophils/eosinophils	Lyst
Msrb1	7.74186e-13	0.252475	1	0.999	1.46352e-08	basophils/eosinophils	Msrb1
Dusp1	9.22988e-13	0.374172	1	0.993	1.74482e-08	basophils/eosinophils	Dusp1
Glrx	1.37499e-12	0.37538	0.943	0.767	2.59928e-08	basophils/eosinophils	Glrx
Ltb	2.52826e-12	0.428413	0.977	0.826	4.77942e-08	basophils/eosinophils	Ltb
Dhrs7	3.70603e-12	0.338683	0.92	0.647	7.00588e-08	basophils/eosinophils	Dhrs7
Lpcat2	5.08384e-12	0.335812	0.862	0.508	9.6105e-08	basophils/eosinophils	Lpcat2
Ubb	7.63453e-12	0.250559	1	1	1.44323e-07	basophils/eosinophils	Ubb
Txnip	9.09428e-12	0.400693	0.977	0.899	1.71918e-07	basophils/eosinophils	Txnip
2310001H17Rik	1.08794e-11	0.285896	0.724	0.358	2.05665e-07	basophils/eosinophils	2310001H17Rik
Hcst	1.74562e-11	0.334238	0.943	0.668	3.29992e-07	basophils/eosinophils	Hcst
Mtus1	1.76793e-11	0.339122	0.943	0.704	3.34209e-07	basophils/eosinophils	Mtus1
Cd37	5.35707e-11	0.31101	0.908	0.623	1.0127e-06	basophils/eosinophils	Cd37
Btg1	1.06689e-10	0.282179	1	0.999	2.01685e-06	basophils/eosinophils	Btg1
Gpcpd1	1.17163e-10	0.336314	0.954	0.815	2.21485e-06	basophils/eosinophils	Gpcpd1
Ets2	3.1562e-10	0.310271	0.851	0.522	5.96649e-06	basophils/eosinophils	Ets2
R3hdm4	3.81474e-10	0.28412	0.862	0.606	7.21139e-06	basophils/eosinophils	R3hdm4
Pilra	4.18995e-10	0.279078	0.828	0.509	7.92067e-06	basophils/eosinophils	Pilra
Nfam1	4.58415e-10	0.27118	0.989	0.969	8.66588e-06	basophils/eosinophils	Nfam1
Timp2	4.70638e-10	0.293237	0.632	0.317	8.89694e-06	basophils/eosinophils	Timp2
Cdkn2d	4.71967e-10	0.314155	0.966	0.79	8.92206e-06	basophils/eosinophils	Cdkn2d
Cebpb	6.74456e-10	0.285055	1	1	1.27499e-05	basophils/eosinophils	Cebpb
Jund	1.03785e-09	0.294907	1	0.985	1.96195e-05	basophils/eosinophils	Jund
F630028O10Rik	1.28554e-09	0.384984	0.736	0.475	2.43019e-05	basophils/eosinophils	F630028O10Rik
Hist1h4i	1.4591e-09	0.285075	0.448	0.186	2.75827e-05	basophils/eosinophils	Hist1h4i
Atxn10	2.29645e-09	0.290702	0.759	0.512	4.34122e-05	basophils/eosinophils	Atxn10
Lcp1	2.9545e-09	0.262483	1	0.994	5.58519e-05	basophils/eosinophils	Lcp1
Fgl2	3.56127e-09	0.316525	0.943	0.723	6.73223e-05	basophils/eosinophils	Fgl2
Snap23	1.02175e-08	0.301799	0.954	0.787	0.000193152	basophils/eosinophils	Snap23
Sell	1.36095e-08	0.334271	0.954	0.683	0.000257274	basophils/eosinophils	Sell
Cks2	1.86914e-08	0.280974	0.529	0.257	0.000353342	basophils/eosinophils	Cks2
Por	2.29853e-08	0.269974	0.851	0.57	0.000434514	basophils/eosinophils	Por
Isg15	2.65278e-08	0.355208	0.839	0.555	0.000501482	basophils/eosinophils	Isg15
Atg3	2.8706e-08	0.269434	0.977	0.908	0.000542659	basophils/eosinophils	Atg3
Ccrl2	3.83218e-08	0.493209	0.874	0.638	0.000724434	basophils/eosinophils	Ccrl2
Rtp4	4.95929e-08	0.299492	0.655	0.379	0.000937503	basophils/eosinophils	Rtp4
Ptgs2	5.53403e-08	0.379603	0.632	0.349	0.00104615	basophils/eosinophils	Ptgs2
Ppp1r2	8.56521e-08	0.251244	0.931	0.786	0.00161917	basophils/eosinophils	Ppp1r2
Picalm	1.1532e-07	0.250982	1	0.975	0.00218	basophils/eosinophils	Picalm
Trib1	1.23758e-07	0.304109	0.92	0.724	0.00233952	basophils/eosinophils	Trib1
S100a6	1.623e-07	0.323914	1	0.999	0.00306812	basophils/eosinophils	S100a6
Ddx6	2.7144e-07	0.268723	0.931	0.793	0.0051313	basophils/eosinophils	Ddx6
Nfkbiz	2.93816e-07	0.267015	0.828	0.591	0.0055543	basophils/eosinophils	Nfkbiz
Gm5150	3.91127e-07	0.2576	0.977	0.913	0.00739386	basophils/eosinophils	Gm5150
Slpi	4.83524e-07	0.279623	0.989	0.814	0.00914054	basophils/eosinophils	Slpi
Cdk2ap2	7.48234e-07	0.332289	0.989	0.973	0.0141446	basophils/eosinophils	Cdk2ap2
Irf1	8.65476e-07	0.304066	0.897	0.652	0.016361	basophils/eosinophils	Irf1
Glipr2	1.02642e-06	0.253025	0.897	0.698	0.0194035	basophils/eosinophils	Glipr2
Osm	1.03178e-06	0.386326	0.874	0.687	0.0195048	basophils/eosinophils	Osm
Anxa1	1.27688e-06	0.286157	0.989	0.955	0.0241382	basophils/eosinophils	Anxa1
Ppp1r15a	1.74247e-06	0.262914	0.92	0.778	0.0329396	basophils/eosinophils	Ppp1r15a
Ngp	1.78768e-06	0.525395	0.333	0.142	0.0337943	basophils/eosinophils	Ngp
Mmp8	6.08992e-06	0.416059	0.805	0.588	0.115124	basophils/eosinophils	Mmp8
Klf2	9.85015e-06	0.291197	1	0.983	0.186207	basophils/eosinophils	Klf2
Nfkbia	6.56388e-05	0.304951	0.885	0.789	1	basophils/eosinophils	Nfkbia
Saa3	0.00832001	0.419032	0.644	0.51	1	basophils/eosinophils	Saa3
Ube2c	1.58697e-104	0.582077	0.606	0.097	3.00002e-100	classical monocytes	Ube2c
Tmsb10	1.99661e-99	0.664687	1	0.999	3.7744e-95	classical monocytes	Tmsb10
Lgals3	4.34052e-91	0.49744	1	1	8.20532e-87	classical monocytes	Lgals3
Pclaf	4.43466e-83	0.459639	0.391	0.039	8.38327e-79	classical monocytes	Pclaf
Stmn1	8.58635e-82	0.452964	0.414	0.047	1.62316e-77	classical monocytes	Stmn1
Lgals1	2.67993e-80	0.791802	1	0.924	5.06614e-76	classical monocytes	Lgals1
Ccnb2	1.93526e-79	0.583061	0.323	0.022	3.65842e-75	classical monocytes	Ccnb2
Arhgdib	4.70678e-71	0.379289	0.997	1	8.8977e-67	classical monocytes	Arhgdib
F13a1	7.54104e-69	0.750866	0.99	0.779	1.42556e-64	classical monocytes	F13a1
Prtn3	9.28827e-66	0.801927	0.933	0.567	1.75585e-61	classical monocytes	Prtn3
Elane	8.63403e-65	0.288031	0.3	0.027	1.63218e-60	classical monocytes	Elane
Capg	1.34922e-62	0.587732	0.987	0.808	2.55057e-58	classical monocytes	Capg
S100a10	3.30764e-62	0.630228	1	0.941	6.25277e-58	classical monocytes	S100a10
Birc5	1.14435e-61	0.431531	0.222	0.01	2.16328e-57	classical monocytes	Birc5
Knstrn	7.70458e-56	0.290136	0.441	0.092	1.45647e-51	classical monocytes	Knstrn
Gapdh	1.56265e-55	0.342819	1	0.999	2.95404e-51	classical monocytes	Gapdh
Hmgn2	3.75038e-55	0.583221	0.862	0.514	7.08972e-51	classical monocytes	Hmgn2
Cfp	4.2272e-55	0.475485	0.869	0.461	7.99111e-51	classical monocytes	Cfp
S100a61	1.51279e-54	0.382897	1	0.999	2.85979e-50	classical monocytes	S100a6
Oaz1	6.68963e-51	0.300569	1	1	1.26461e-46	classical monocytes	Oaz1
Ly6c2	1.21083e-48	0.55365	0.993	0.861	2.28895e-44	classical monocytes	Ly6c2
Myl6	1.69743e-47	0.276104	1	0.999	3.20882e-43	classical monocytes	Myl6
Ppia	2.3448e-47	0.429552	1	0.999	4.43261e-43	classical monocytes	Ppia
Sec61b	1.35738e-46	0.298884	1	1	2.56599e-42	classical monocytes	Sec61b
Sell1	2.98919e-46	0.518554	0.973	0.643	5.65077e-42	classical monocytes	Sell
Atp5j	1.439e-45	0.325725	0.993	0.992	2.72028e-41	classical monocytes	Atp5j
Tspo	2.9187e-44	0.328507	1	0.997	5.51752e-40	classical monocytes	Tspo
S100a111	7.42101e-44	0.395694	1	0.996	1.40287e-39	classical monocytes	S100a11
Mrpl33	6.21089e-43	0.358126	1	0.996	1.17411e-38	classical monocytes	Mrpl33
Rbm3	8.86682e-43	0.321258	1	0.999	1.67618e-38	classical monocytes	Rbm3
Prdx1	2.00198e-41	0.327663	1	0.992	3.78454e-37	classical monocytes	Prdx1
Hopx	2.30138e-41	0.498109	0.98	0.88	4.35053e-37	classical monocytes	Hopx
Fn1	2.57796e-41	0.632476	0.963	0.76	4.87338e-37	classical monocytes	Fn1
Cox6c	5.4671e-41	0.267009	1	1	1.0335e-36	classical monocytes	Cox6c
Sh3bgrl3	2.6296e-40	0.2841	1	0.999	4.97099e-36	classical monocytes	Sh3bgrl3
Snrpg	2.9047e-40	0.29402	0.997	0.993	5.49105e-36	classical monocytes	Snrpg
H2afz	4.75899e-40	0.41974	1	0.999	8.99639e-36	classical monocytes	H2afz
Selenoh	9.96807e-40	0.440476	0.845	0.556	1.88436e-35	classical monocytes	Selenoh
Hmgb21	1.97411e-38	0.672255	1	0.988	3.73186e-34	classical monocytes	Hmgb2
S100a13	2.26398e-37	0.334831	0.99	0.932	4.27983e-33	classical monocytes	S100a13
Plp2	2.29726e-37	0.376502	0.835	0.502	4.34275e-33	classical monocytes	Plp2
Anxa2	4.587e-37	0.32728	1	0.98	8.67127e-33	classical monocytes	Anxa2
Dbi	6.30173e-37	0.308136	0.997	0.994	1.19128e-32	classical monocytes	Dbi
Serpinb1a	9.54204e-37	0.300248	0.529	0.187	1.80383e-32	classical monocytes	Serpinb1a
Pkm	1.11499e-36	0.305365	0.997	0.993	2.10778e-32	classical monocytes	Pkm
Mki67	1.24869e-36	0.415495	0.269	0.05	2.36052e-32	classical monocytes	Mki67
Sec11c	1.32393e-36	0.33666	0.997	0.951	2.50276e-32	classical monocytes	Sec11c
Ybx1	7.70065e-36	0.283554	1	0.999	1.45573e-31	classical monocytes	Ybx1
Ndufa4	8.11462e-36	0.265279	0.997	0.997	1.53399e-31	classical monocytes	Ndufa4
Rnaseh2c	5.11238e-34	0.372774	0.879	0.654	9.66444e-30	classical monocytes	Rnaseh2c
Mgst1	6.58243e-34	0.381444	0.983	0.905	1.24434e-29	classical monocytes	Mgst1
Ciao2a	1.3604e-31	0.306272	0.997	0.959	2.5717e-27	classical monocytes	Ciao2a
Cisd1	2.33494e-31	0.338051	0.875	0.586	4.41398e-27	classical monocytes	Cisd1
Ly6c1	2.93776e-31	0.326291	0.943	0.621	5.55355e-27	classical monocytes	Ly6c1
Prdx4	4.09714e-31	0.316866	0.758	0.441	7.74523e-27	classical monocytes	Prdx4
Tmem256	6.74118e-31	0.252692	1	0.986	1.27435e-26	classical monocytes	Tmem256
Rps2	1.19587e-30	0.273728	1	0.999	2.26066e-26	classical monocytes	Rps2
Ethe1	2.13398e-30	0.338787	0.916	0.755	4.03407e-26	classical monocytes	Ethe1
Cd24a1	9.97817e-30	0.366643	0.515	0.215	1.88627e-25	classical monocytes	Cd24a
Cks1b	1.14467e-29	0.346268	0.394	0.133	2.16388e-25	classical monocytes	Cks1b
Ndufb11	1.88239e-29	0.267051	0.993	0.955	3.55847e-25	classical monocytes	Ndufb11
Elob	2.79003e-29	0.251154	0.997	0.994	5.27427e-25	classical monocytes	Elob
Glipr21	1.48005e-28	0.291931	0.936	0.665	2.79789e-24	classical monocytes	Glipr2
Rnh1	1.88764e-28	0.311495	0.997	0.955	3.5684e-24	classical monocytes	Rnh1
Txn11	2.3715e-28	0.269377	1	0.997	4.48309e-24	classical monocytes	Txn1
Snrpf	5.48441e-27	0.295797	0.976	0.896	1.03677e-22	classical monocytes	Snrpf
Anxa11	9.98423e-27	0.37145	1	0.948	1.88742e-22	classical monocytes	Anxa1
Pycard	1.24007e-26	0.305853	0.956	0.876	2.34423e-22	classical monocytes	Pycard
Itga1	3.38465e-26	0.251461	0.542	0.238	6.39835e-22	classical monocytes	Itga1
AI839979	6.82657e-26	0.383829	0.886	0.639	1.2905e-21	classical monocytes	AI839979
Mmp81	7.13642e-26	0.433214	0.832	0.554	1.34907e-21	classical monocytes	Mmp8
Aldoa	1.45678e-25	0.263683	1	0.987	2.75391e-21	classical monocytes	Aldoa
Tle5	3.72458e-25	0.273326	0.983	0.891	7.04095e-21	classical monocytes	Tle5
Pgam1	8.33727e-25	0.282806	0.997	0.949	1.57608e-20	classical monocytes	Pgam1
Eno1	3.62159e-24	0.254973	0.993	0.968	6.84625e-20	classical monocytes	Eno1
Lbr	7.00455e-24	0.330581	0.825	0.565	1.32414e-19	classical monocytes	Lbr
Atxn101	2.18863e-23	0.259107	0.774	0.475	4.13739e-19	classical monocytes	Atxn10
Prdx6	2.99828e-23	0.296331	0.956	0.852	5.66795e-19	classical monocytes	Prdx6
Hnrnpa1	1.30222e-22	0.254568	0.987	0.939	2.46171e-18	classical monocytes	Hnrnpa1
Cenpa	1.33411e-22	0.58994	0.481	0.223	2.522e-18	classical monocytes	Cenpa
H2afv	1.35539e-22	0.468147	0.845	0.666	2.56223e-18	classical monocytes	H2afv
Vcan	1.6347e-22	0.43157	0.724	0.451	3.09024e-18	classical monocytes	Vcan
Atpif1	3.73741e-22	0.281801	0.976	0.908	7.0652e-18	classical monocytes	Atpif1
Esyt1	5.04403e-22	0.274985	0.953	0.782	9.53524e-18	classical monocytes	Esyt1
C1galt1c1	6.15962e-22	0.316796	0.798	0.526	1.16441e-17	classical monocytes	C1galt1c1
Pgk1	6.7686e-22	0.256949	0.98	0.94	1.27954e-17	classical monocytes	Pgk1
Sqor	7.34008e-22	0.254196	0.892	0.715	1.38757e-17	classical monocytes	Sqor
Etfb	7.58762e-22	0.254287	0.926	0.812	1.43436e-17	classical monocytes	Etfb
Itgb7	2.53898e-21	0.274616	0.966	0.815	4.79969e-17	classical monocytes	Itgb7
Swi5	4.18293e-21	0.254562	0.96	0.836	7.90741e-17	classical monocytes	Swi5
Slpi1	6.18816e-21	0.374728	0.963	0.796	1.16981e-16	classical monocytes	Slpi
Ifitm6	9.28504e-21	0.288552	1	0.944	1.75524e-16	classical monocytes	Ifitm6
Ddost	1.67022e-20	0.254384	0.919	0.79	3.15738e-16	classical monocytes	Ddost
Hp1	7.40028e-20	0.251703	1	0.975	1.39895e-15	classical monocytes	Hp
C3	2.15919e-19	0.306919	0.983	0.919	4.08174e-15	classical monocytes	C3
Pygl1	4.80019e-19	0.26587	0.899	0.71	9.07429e-15	classical monocytes	Pygl
Lsm5	1.10345e-18	0.30934	0.872	0.717	2.08596e-14	classical monocytes	Lsm5
Ptma	2.44915e-18	0.358893	1	0.999	4.62988e-14	classical monocytes	Ptma
Osm1	8.05234e-18	0.425219	0.855	0.665	1.52221e-13	classical monocytes	Osm
Pttg1	9.50286e-18	0.314661	0.259	0.09	1.79642e-13	classical monocytes	Pttg1
Hist1h2bc1	1.06188e-17	0.331471	0.535	0.299	2.00739e-13	classical monocytes	Hist1h2bc
Lsm4	4.28246e-15	0.256435	0.815	0.697	8.09556e-11	classical monocytes	Lsm4
Nucks1	2.63333e-11	0.361787	0.71	0.544	4.97805e-07	classical monocytes	Nucks1
Wfdc211	3.64602e-11	0.465852	0.67	0.467	6.89243e-07	classical monocytes	Wfdc21
S100a81	6.7779e-10	0.646478	0.98	0.969	1.28129e-05	classical monocytes	S100a8
Ptms	1.6131e-08	0.275511	0.845	0.745	0.00030494	classical monocytes	Ptms
Lcn21	1.64778e-08	0.532099	0.549	0.394	0.000311496	classical monocytes	Lcn2
Hmgb1	3.93134e-08	0.292124	0.99	0.986	0.00074318	classical monocytes	Hmgb1
Cks21	1.1705e-07	0.250521	0.391	0.247	0.00221272	classical monocytes	Cks2
Mt1	9.35331e-05	0.317219	0.781	0.689	1	classical monocytes	Mt1
Ifit1bl1	2.78535e-86	0.651689	0.533	0.013	5.26543e-82	IFN-associated monocytes	Ifit1bl1
Ifit3b	9.84794e-79	0.816816	0.533	0.015	1.86165e-74	IFN-associated monocytes	Ifit3b
Rsad2	2.88569e-75	2.24328	0.867	0.054	5.45511e-71	IFN-associated monocytes	Rsad2
Ifit2	4.88294e-73	1.80455	0.933	0.069	9.23072e-69	IFN-associated monocytes	Ifit2
Ifit1	7.92245e-69	1.99432	0.933	0.072	1.49766e-64	IFN-associated monocytes	Ifit1
Ifit3	6.09999e-63	1.61975	0.833	0.063	1.15314e-58	IFN-associated monocytes	Ifit3
Cxcl10	1.54771e-55	2.02902	0.567	0.029	2.9258e-51	IFN-associated monocytes	Cxcl10
Usp18	3.01403e-42	1.13139	0.9	0.121	5.69773e-38	IFN-associated monocytes	Usp18
Rilpl1	9.42325e-34	0.282541	0.3	0.013	1.78137e-29	IFN-associated monocytes	Rilpl1
Gm13822	1.64739e-33	0.451515	0.467	0.034	3.11422e-29	IFN-associated monocytes	Gm13822
Oasl1	2.12584e-32	1.08064	0.867	0.149	4.01869e-28	IFN-associated monocytes	Oasl1
Oasl2	4.85118e-32	0.993692	0.867	0.145	9.17067e-28	IFN-associated monocytes	Oasl2
Slfn9	7.06015e-28	0.636681	0.733	0.112	1.33465e-23	IFN-associated monocytes	Slfn9
Tnfsf10	2.77359e-27	0.266558	0.367	0.025	5.2432e-23	IFN-associated monocytes	Tnfsf10
Herc6	1.34219e-24	0.85574	0.933	0.257	2.53727e-20	IFN-associated monocytes	Herc6
Phf11a	3.83065e-24	0.632278	0.567	0.078	7.24146e-20	IFN-associated monocytes	Phf11a
Tor3a	4.79392e-23	1.0298	1	0.432	9.06243e-19	IFN-associated monocytes	Tor3a
Rtp41	6.38865e-23	1.1873	1	0.382	1.20771e-18	IFN-associated monocytes	Rtp4
Phf11d	1.39509e-21	0.703357	0.7	0.135	2.63727e-17	IFN-associated monocytes	Phf11d
Ifih1	1.59629e-21	0.980939	1	0.398	3.01763e-17	IFN-associated monocytes	Ifih1
Ifi214	2.3113e-21	0.62217	0.6	0.098	4.36928e-17	IFN-associated monocytes	Ifi214
Isg151	3.66998e-21	2.04224	1	0.561	6.93773e-17	IFN-associated monocytes	Isg15
Phf11b	9.51084e-21	1.06219	1	0.399	1.79793e-16	IFN-associated monocytes	Phf11b
Eif2ak2	1.44575e-20	0.920727	0.967	0.36	2.73304e-16	IFN-associated monocytes	Eif2ak2
Cmpk2	3.95107e-20	0.998112	0.767	0.181	7.46911e-16	IFN-associated monocytes	Cmpk2
Ifi44	2.60818e-19	1.59706	0.967	0.527	4.93051e-15	IFN-associated monocytes	Ifi44
Ddx60	4.48721e-19	0.524553	0.533	0.083	8.48262e-15	IFN-associated monocytes	Ddx60
Slfn5	5.40701e-19	1.42061	1	0.756	1.02214e-14	IFN-associated monocytes	Slfn5
Ifi47	7.96755e-19	1.29785	1	0.545	1.50619e-14	IFN-associated monocytes	Ifi47
Isg20	1.64529e-18	0.949571	0.833	0.231	3.11025e-14	IFN-associated monocytes	Isg20
Irf7	1.71714e-18	1.6091	1	0.682	3.24608e-14	IFN-associated monocytes	Irf7
Daxx	2.06142e-18	0.87194	1	0.52	3.89691e-14	IFN-associated monocytes	Daxx
Trim30d	2.33064e-18	0.318541	0.3	0.026	4.40585e-14	IFN-associated monocytes	Trim30d
Ifi205	2.33395e-18	0.686234	0.767	0.189	4.41209e-14	IFN-associated monocytes	Ifi205
Slc25a22	5.11375e-18	0.384974	0.6	0.112	9.66704e-14	IFN-associated monocytes	Slc25a22
Xaf1	5.65214e-18	0.902402	1	0.532	1.06848e-13	IFN-associated monocytes	Xaf1
Ifi209	8.75078e-18	1.20427	0.967	0.635	1.65425e-13	IFN-associated monocytes	Ifi209
Ifi203	1.4889e-17	1.31627	1	0.783	2.81461e-13	IFN-associated monocytes	Ifi203
Slfn11	3.00171e-17	1.16405	1	0.664	5.67442e-13	IFN-associated monocytes	Slfn1
Samd9l	3.06929e-17	0.954224	0.967	0.489	5.80218e-13	IFN-associated monocytes	Samd9l
Gbp9	4.10127e-17	0.558298	0.7	0.153	7.75304e-13	IFN-associated monocytes	Gbp9
Klrk1	4.37635e-17	0.414086	0.6	0.112	8.27306e-13	IFN-associated monocytes	Klrk1
Gbp5	5.87331e-17	0.729833	0.767	0.205	1.11029e-12	IFN-associated monocytes	Gbp5
Mndal	1.14455e-16	1.17509	1	0.933	2.16366e-12	IFN-associated monocytes	Mndal
A530040E14Rik	1.25059e-16	0.281594	0.433	0.061	2.36411e-12	IFN-associated monocytes	A530040E14Rik
Gbp2b	1.59927e-16	1.0385	0.933	0.392	3.02326e-12	IFN-associated monocytes	Gbp2b
Ifi202b	1.70737e-16	1.08653	1	0.805	3.22761e-12	IFN-associated monocytes	Ifi202b
Znfx1	1.77393e-16	0.834524	0.9	0.332	3.35343e-12	IFN-associated monocytes	Znfx1
Ube2l6	2.48175e-16	0.647257	0.867	0.266	4.6915e-12	IFN-associated monocytes	Ube2l6
Igtp	4.66854e-16	0.728478	0.9	0.327	8.8254e-12	IFN-associated monocytes	Igtp
Trim30c	5.86202e-16	0.476477	0.533	0.099	1.10816e-11	IFN-associated monocytes	Trim30c
Ifi204	6.60378e-16	1.25569	1	0.752	1.24838e-11	IFN-associated monocytes	Ifi204
Nt5c3	8.01803e-16	0.694914	0.8	0.271	1.51573e-11	IFN-associated monocytes	Nt5c3
Ifi211	8.28992e-16	0.921939	0.933	0.431	1.56713e-11	IFN-associated monocytes	Ifi211
Ifi44l	1.58474e-15	1.00183	0.967	0.499	2.99578e-11	IFN-associated monocytes	Ifi44l
Gm20559	3.12223e-15	0.366216	0.6	0.128	5.90225e-11	IFN-associated monocytes	Gm20559
Sp100	4.98935e-15	0.835119	1	0.862	9.43186e-11	IFN-associated monocytes	Sp100
Trim30a	5.37087e-15	0.897355	1	0.767	1.01531e-10	IFN-associated monocytes	Trim30a
Rnf213	7.38716e-15	0.863143	1	0.577	1.39647e-10	IFN-associated monocytes	Rnf213
Ddx58	7.67689e-15	0.779759	0.833	0.289	1.45124e-10	IFN-associated monocytes	Ddx58
Slfn8	9.0601e-15	0.71229	0.9	0.356	1.71272e-10	IFN-associated monocytes	Slfn8
2022-03-05	1.45793e-14	0.793825	1	0.76	2.75607e-10	IFN-associated monocytes	2022-03-05
Frmd4a	1.93063e-14	0.657884	0.733	0.214	3.64966e-10	IFN-associated monocytes	Frmd4a
Parp14	2.56533e-14	0.957773	1	0.647	4.8495e-10	IFN-associated monocytes	Parp14
Gbp7	9.04262e-14	0.91209	0.933	0.508	1.70942e-09	IFN-associated monocytes	Gbp7
Irgm1	1.66716e-13	0.920277	0.933	0.476	3.15161e-09	IFN-associated monocytes	Irgm1
Fcgr1	2.07575e-13	1.04411	0.933	0.686	3.924e-09	IFN-associated monocytes	Fcgr1
Zbp1	2.51526e-13	0.768368	1	0.811	4.75485e-09	IFN-associated monocytes	Zbp1
Ms4a4c	4.05044e-13	0.874632	1	0.972	7.65695e-09	IFN-associated monocytes	Ms4a4c
Stat1	7.6349e-13	0.850962	1	0.788	1.4433e-08	IFN-associated monocytes	Stat1
Setdb2	9.73135e-13	0.531769	0.633	0.166	1.83961e-08	IFN-associated monocytes	Setdb2
Pnp	1.85987e-12	0.835485	1	0.905	3.51589e-08	IFN-associated monocytes	Pnp
Parp12	2.03419e-12	0.651433	0.867	0.402	3.84544e-08	IFN-associated monocytes	Parp12
Trafd1	2.10012e-12	0.794022	1	0.763	3.97007e-08	IFN-associated monocytes	Trafd1
Nmral1	2.3809e-12	0.45347	0.6	0.163	4.50084e-08	IFN-associated monocytes	Nmral1
Bst2	2.70154e-12	0.931198	1	0.79	5.10699e-08	IFN-associated monocytes	Bst2
Gbp4	3.21465e-12	0.532055	0.567	0.137	6.07698e-08	IFN-associated monocytes	Gbp4
Epsti1	3.84656e-12	0.681576	0.933	0.489	7.27154e-08	IFN-associated monocytes	Epsti1
Ifi35	6.79154e-12	0.65417	0.933	0.644	1.28387e-07	IFN-associated monocytes	Ifi35
Fgl21	7.57587e-12	0.793704	1	0.729	1.43214e-07	IFN-associated monocytes	Fgl2
Ifi207	7.77575e-12	0.847067	0.967	0.684	1.46993e-07	IFN-associated monocytes	Ifi207
Oas3	8.9118e-12	0.613517	0.867	0.364	1.68469e-07	IFN-associated monocytes	Oas3
Gbp2	9.90927e-12	0.683888	0.9	0.39	1.87325e-07	IFN-associated monocytes	Gbp2
Ly6e	1.58851e-11	0.650822	1	0.979	3.00291e-07	IFN-associated monocytes	Ly6e
Ms4a6d	1.8267e-11	0.630722	1	0.995	3.45319e-07	IFN-associated monocytes	Ms4a6d
Fam241a	2.13399e-11	0.625194	0.967	0.566	4.0341e-07	IFN-associated monocytes	Fam241a
Adap2	2.66586e-11	0.282146	0.533	0.128	5.03953e-07	IFN-associated monocytes	Adap2
Stat2	3.2523e-11	0.65769	0.833	0.364	6.14814e-07	IFN-associated monocytes	Stat2
Dtx3l	5.24787e-11	0.685074	0.967	0.615	9.92057e-07	IFN-associated monocytes	Dtx3l
H2-T23	5.50437e-11	0.652003	0.967	0.965	1.04055e-06	IFN-associated monocytes	H2-T23
Lgals9	6.88679e-11	0.721094	0.933	0.505	1.30188e-06	IFN-associated monocytes	Lgals9
Pik3ap1	1.17044e-10	0.656017	0.933	0.551	2.21259e-06	IFN-associated monocytes	Pik3ap1
Sp140	1.26515e-10	0.592498	1	0.752	2.39165e-06	IFN-associated monocytes	Sp140
Gbp6	1.28907e-10	0.303489	0.333	0.055	2.43685e-06	IFN-associated monocytes	Gbp6
Iigp1	1.4725e-10	0.507713	0.367	0.065	2.78362e-06	IFN-associated monocytes	Iigp1
Gramd3	1.65058e-10	0.305649	0.5	0.125	3.12026e-06	IFN-associated monocytes	Gramd3
Dck	2.01253e-10	0.636364	0.867	0.48	3.80448e-06	IFN-associated monocytes	Dck
Gbp3	2.43678e-10	0.821912	0.867	0.489	4.60649e-06	IFN-associated monocytes	Gbp3
Oas1a	2.56875e-10	0.528786	0.833	0.411	4.85596e-06	IFN-associated monocytes	Oas1a
Helz2	2.72249e-10	0.519699	0.667	0.244	5.14659e-06	IFN-associated monocytes	Helz2
Parp10	2.9414e-10	0.393777	0.7	0.252	5.56042e-06	IFN-associated monocytes	Parp10
Chmp4b	3.48567e-10	0.454	1	0.986	6.58931e-06	IFN-associated monocytes	Chmp4b
Serpina3g	3.78285e-10	0.407195	0.433	0.092	7.1511e-06	IFN-associated monocytes	Serpina3g
Plac8	4.0278e-10	0.516177	1	1	7.61415e-06	IFN-associated monocytes	Plac8
Dek	8.72132e-10	0.594289	1	0.918	1.64868e-05	IFN-associated monocytes	Dek
H2-T22	1.248e-09	0.642265	0.967	0.672	2.35922e-05	IFN-associated monocytes	H2-T22
Usp25	2.05961e-09	0.573279	0.967	0.759	3.89349e-05	IFN-associated monocytes	Usp25
Stard3	2.18893e-09	0.439006	0.933	0.546	4.13795e-05	IFN-associated monocytes	Stard3
Oas2	2.62649e-09	0.3368	0.7	0.245	4.96512e-05	IFN-associated monocytes	Oas2
Dhx58	3.59752e-09	0.385713	0.8	0.352	6.80075e-05	IFN-associated monocytes	Dhx58
Psmb9	3.68955e-09	0.525976	1	0.961	6.97473e-05	IFN-associated monocytes	Psmb9
Pml	6.65448e-09	0.319149	0.467	0.12	0.000125796	IFN-associated monocytes	Pml
Nmi	7.0817e-09	0.506407	0.9	0.616	0.000133872	IFN-associated monocytes	Nmi
Slfn2	9.73216e-09	0.547364	1	0.976	0.000183977	IFN-associated monocytes	Slfn2
Cd40	1.11122e-08	0.674703	0.733	0.344	0.000210066	IFN-associated monocytes	Cd40
Sp110	1.12099e-08	0.610169	0.9	0.751	0.000211912	IFN-associated monocytes	Sp110
Tap1	1.13922e-08	0.564605	0.933	0.73	0.000215359	IFN-associated monocytes	Tap1
Snx2	1.37834e-08	0.634449	0.967	0.817	0.000260561	IFN-associated monocytes	Snx2
Mitd1	1.75506e-08	0.507488	0.8	0.373	0.000331777	IFN-associated monocytes	Mitd1
Ms4a6b	1.9365e-08	0.463009	1	0.984	0.000366076	IFN-associated monocytes	Ms4a6b
Zup1	1.99766e-08	0.554047	0.833	0.456	0.000377639	IFN-associated monocytes	Zup1
Larp1	4.00902e-08	0.508284	0.933	0.675	0.000757866	IFN-associated monocytes	Larp1
Psmb8	4.0361e-08	0.451263	1	0.996	0.000762985	IFN-associated monocytes	Psmb8
Tdrd7	4.4629e-08	0.372322	0.8	0.366	0.000843666	IFN-associated monocytes	Tdrd7
Etnk1	4.62689e-08	0.513959	0.8	0.42	0.000874667	IFN-associated monocytes	Etnk1
Ms4a6c	5.79181e-08	0.352576	1	0.999	0.00109488	IFN-associated monocytes	Ms4a6c
Sppl2a	6.07358e-08	0.595314	0.967	0.833	0.00114815	IFN-associated monocytes	Sppl2a
Fndc3a	6.3584e-08	0.555989	0.833	0.546	0.00120199	IFN-associated monocytes	Fndc3a
Cd69	8.11805e-08	0.443507	0.367	0.091	0.00153464	IFN-associated monocytes	Cd69
Cfb	9.87454e-08	0.463234	0.8	0.37	0.00186668	IFN-associated monocytes	Cfb
Tent4a	1.13219e-07	0.319381	0.567	0.195	0.00214029	IFN-associated monocytes	Tent4a
Calhm6	1.20222e-07	0.581768	0.767	0.385	0.00227267	IFN-associated monocytes	Calhm6
Mthfr	1.79877e-07	0.267539	0.4	0.109	0.0034004	IFN-associated monocytes	Mthfr
Ankle2	1.96991e-07	0.385144	0.8	0.456	0.00372392	IFN-associated monocytes	Ankle2
Capza2	2.48339e-07	0.337408	1	0.999	0.0046946	IFN-associated monocytes	Capza2
Lgals3bp	2.50777e-07	0.495101	0.733	0.334	0.00474068	IFN-associated monocytes	Lgals3bp
Ctsc	2.63715e-07	0.478802	1	0.996	0.00498527	IFN-associated monocytes	Ctsc
Aldh1b1	2.75562e-07	0.343599	0.433	0.137	0.00520923	IFN-associated monocytes	Aldh1b1
Ifitm3	3.65837e-07	0.344303	1	0.999	0.00691579	IFN-associated monocytes	Ifitm3
Il27	3.91005e-07	0.357355	0.433	0.126	0.00739156	IFN-associated monocytes	Il27
9930111J21Rik2	4.6402e-07	0.596	0.867	0.758	0.00877184	IFN-associated monocytes	9930111J21Rik2
Samhd1	4.64631e-07	0.342935	1	0.999	0.00878338	IFN-associated monocytes	Samhd1
AW112010	5.11102e-07	0.634229	0.967	0.637	0.00966187	IFN-associated monocytes	AW112010
Slfn41	5.30888e-07	0.407758	0.467	0.148	0.0100359	IFN-associated monocytes	Slfn4
Rnf114	5.50764e-07	0.392131	0.9	0.553	0.0104116	IFN-associated monocytes	Rnf114
Il18	5.88479e-07	0.514716	0.667	0.331	0.0111246	IFN-associated monocytes	Il18
Hmox2	7.13936e-07	0.509418	0.9	0.762	0.0134962	IFN-associated monocytes	Hmox2
Sdc3	8.48576e-07	0.434261	0.667	0.297	0.0160415	IFN-associated monocytes	Sdc3
A530032D15Rik	9.01076e-07	0.288181	0.533	0.194	0.0170339	IFN-associated monocytes	A530032D15Rik
Cd47	1.05816e-06	0.314837	1	0.998	0.0200034	IFN-associated monocytes	Cd47
Tor1aip1	1.06811e-06	0.553043	1	0.888	0.0201915	IFN-associated monocytes	Tor1aip1
Ifi27l2a	1.1751e-06	0.622789	1	0.942	0.0222141	IFN-associated monocytes	Ifi27l2a
Dbnl	1.18229e-06	0.356918	1	0.885	0.02235	IFN-associated monocytes	Dbnl
Il18bp	1.42853e-06	0.294307	0.367	0.104	0.0270049	IFN-associated monocytes	Il18bp
Ly6c21	1.46786e-06	0.744688	1	0.88	0.0277485	IFN-associated monocytes	Ly6c2
Prr5l	1.51732e-06	0.329506	0.767	0.353	0.0286834	IFN-associated monocytes	Prr5l
Max	1.57887e-06	0.385622	0.9	0.608	0.029847	IFN-associated monocytes	Max
Nlrc5	1.68539e-06	0.354035	0.6	0.256	0.0318607	IFN-associated monocytes	Nlrc5
C130026I21Rik	1.84373e-06	0.412401	0.633	0.281	0.0348538	IFN-associated monocytes	C130026I21Rik
B2m	2.50358e-06	0.288464	1	1	0.0473276	IFN-associated monocytes	B2m
Ranbp2	2.81333e-06	0.385529	0.867	0.579	0.0531832	IFN-associated monocytes	Ranbp2
Psmb10	3.43962e-06	0.383464	1	0.958	0.0650225	IFN-associated monocytes	Psmb10
Peli1	3.54338e-06	0.496621	0.833	0.708	0.0669841	IFN-associated monocytes	Peli1
Gpr141	4.32107e-06	0.573018	0.933	0.914	0.0816854	IFN-associated monocytes	Gpr141
Ogfr	4.43425e-06	0.469965	0.867	0.693	0.0838251	IFN-associated monocytes	Ogfr
Psme1	4.44447e-06	0.393772	1	0.986	0.0840182	IFN-associated monocytes	Psme1
Pgap2	4.73488e-06	0.358578	0.767	0.424	0.0895081	IFN-associated monocytes	Pgap2
Clic4	5.63347e-06	0.402815	0.767	0.431	0.106495	IFN-associated monocytes	Clic4
Zc3hav1	5.76993e-06	0.350963	0.9	0.661	0.109075	IFN-associated monocytes	Zc3hav1
Nampt	8.22797e-06	0.499262	0.833	0.587	0.155542	IFN-associated monocytes	Nampt
Ehd4	9.37542e-06	0.335679	0.967	0.914	0.177233	IFN-associated monocytes	Ehd4
Uba7	1.07319e-05	0.295301	0.567	0.24	0.202877	IFN-associated monocytes	Uba7
Casp4	1.09467e-05	0.417859	0.9	0.639	0.206937	IFN-associated monocytes	Casp4
Ms4a4b	1.23472e-05	0.265165	0.7	0.339	0.233411	IFN-associated monocytes	Ms4a4b
Naa25	1.51382e-05	0.365285	0.567	0.258	0.286172	IFN-associated monocytes	Naa25
Tspo1	2.32164e-05	0.330427	1	0.998	0.438882	IFN-associated monocytes	Tspo
Rap2c	3.42378e-05	0.423135	0.833	0.571	0.647231	IFN-associated monocytes	Rap2c
Pdcd10	3.9371e-05	0.26172	1	0.894	0.744269	IFN-associated monocytes	Pdcd10
Ly86	4.12906e-05	0.436025	1	0.973	0.780557	IFN-associated monocytes	Ly86
Tapbp	6.87746e-05	0.4602	0.933	0.93	1	IFN-associated monocytes	Tapbp
Tor1aip2	6.96276e-05	0.356869	0.633	0.375	1	IFN-associated monocytes	Tor1aip2
Dpy19l1	6.98119e-05	0.378422	0.8	0.611	1	IFN-associated monocytes	Dpy19l1
Stx16	8.16683e-05	0.323184	0.867	0.656	1	IFN-associated monocytes	Stx16
Cd164	8.57321e-05	0.266659	0.6	0.314	1	IFN-associated monocytes	Cd164
Dcp2	9.19754e-05	0.307903	0.7	0.449	1	IFN-associated monocytes	Dcp2
Evi2a	9.64745e-05	0.293364	1	0.913	1	IFN-associated monocytes	Evi2a
Evl	0.000111767	0.329439	0.9	0.675	1	IFN-associated monocytes	Evl
H3f3b	0.00011313	0.324686	1	1	1	IFN-associated monocytes	H3f3b
Psme2	0.00011509	0.302721	1	0.967	1	IFN-associated monocytes	Psme2
Cd180	0.000117167	0.252914	0.6	0.288	1	IFN-associated monocytes	Cd180
Itpr1	0.00012034	0.300634	0.633	0.349	1	IFN-associated monocytes	Itpr1
Clec2d	0.000130937	0.421582	0.833	0.585	1	IFN-associated monocytes	Clec2d
BC051226	0.000135242	0.293194	0.533	0.258	1	IFN-associated monocytes	BC051226
Nsd3	0.000147683	0.382512	0.967	0.817	1	IFN-associated monocytes	Nsd3
Bri3	0.00015746	0.304346	0.967	0.993	1	IFN-associated monocytes	Bri3
Resf11	0.000162778	0.414824	0.833	0.632	1	IFN-associated monocytes	Resf1
Themis2	0.000208057	0.342856	0.933	0.738	1	IFN-associated monocytes	Themis2
Dnaja1	0.000214715	0.379134	1	0.927	1	IFN-associated monocytes	Dnaja1
Fcgr4	0.000220344	0.550974	0.767	0.548	1	IFN-associated monocytes	Fcgr4
Srgap2	0.000224888	0.342153	0.8	0.501	1	IFN-associated monocytes	Srgap2
Pcgf5	0.000238556	0.331937	0.767	0.519	1	IFN-associated monocytes	Pcgf5
Tcirg1	0.000246094	0.271941	0.933	0.713	1	IFN-associated monocytes	Tcirg1
Xrn2	0.000250402	0.318597	1	0.891	1	IFN-associated monocytes	Xrn2
Psma5	0.000264889	0.255949	1	0.922	1	IFN-associated monocytes	Psma5
Sdcbp	0.000273575	0.281173	1	0.976	1	IFN-associated monocytes	Sdcbp
Cd52	0.000296571	0.26928	1	1	1	IFN-associated monocytes	Cd52
Mpeg1	0.00035909	0.306516	1	0.996	1	IFN-associated monocytes	Mpeg1
H2afy	0.000359323	0.27098	1	0.995	1	IFN-associated monocytes	H2afy
Tmem106a	0.000388974	0.397532	0.767	0.603	1	IFN-associated monocytes	Tmem106a
Dclre1c	0.000420321	0.273975	0.5	0.249	1	IFN-associated monocytes	Dclre1c
Mycbp2	0.00045115	0.360173	0.933	0.901	1	IFN-associated monocytes	Mycbp2
Rasa4	0.000454925	0.360079	0.667	0.399	1	IFN-associated monocytes	Rasa4
Lnpep	0.000458027	0.308632	0.933	0.79	1	IFN-associated monocytes	Lnpep
Selenow	0.000491977	0.400539	0.967	0.884	1	IFN-associated monocytes	Selenow
Hspa5	0.000515738	0.370454	0.967	0.97	1	IFN-associated monocytes	Hspa5
Keap1	0.000568513	0.283262	0.667	0.406	1	IFN-associated monocytes	Keap1
Adar	0.000576239	0.270499	0.633	0.374	1	IFN-associated monocytes	Adar
Ogfrl1	0.000592847	0.371458	0.967	0.799	1	IFN-associated monocytes	Ogfrl1
Sap30	0.000702279	0.314315	0.967	0.838	1	IFN-associated monocytes	Sap30
Elf1	0.000717259	0.421811	0.8	0.674	1	IFN-associated monocytes	Elf1
Ly6c11	0.000761065	0.392533	0.867	0.669	1	IFN-associated monocytes	Ly6c1
Irf2	0.000837126	0.350828	0.967	0.918	1	IFN-associated monocytes	Irf2
Ccr5	0.000893389	0.361737	0.7	0.447	1	IFN-associated monocytes	Ccr5
Bbx	0.000940521	0.267332	0.733	0.479	1	IFN-associated monocytes	Bbx
AI662270	0.000958428	0.293264	0.933	0.866	1	IFN-associated monocytes	AI662270
Svbp	0.000989294	0.266116	0.833	0.657	1	IFN-associated monocytes	Svbp
Sema4d	0.000994331	0.263995	0.867	0.589	1	IFN-associated monocytes	Sema4d
Slirp	0.00114785	0.255093	0.867	0.72	1	IFN-associated monocytes	Slirp
Tmem243	0.00119703	0.278157	0.767	0.663	1	IFN-associated monocytes	Tmem243
Maf	0.00128725	0.289051	0.567	0.289	1	IFN-associated monocytes	Maf
Ddx24	0.0012928	0.258315	1	0.817	1	IFN-associated monocytes	Ddx24
Ilrun	0.0013349	0.274171	0.833	0.582	1	IFN-associated monocytes	Ilrun
Smchd1	0.00133591	0.277383	0.833	0.669	1	IFN-associated monocytes	Smchd1
Rnase6	0.00133803	0.390993	0.9	0.734	1	IFN-associated monocytes	Rnase6
Slamf8	0.0014268	0.389449	0.433	0.238	1	IFN-associated monocytes	Slamf8
Xrn1	0.00144845	0.284127	0.667	0.402	1	IFN-associated monocytes	Xrn1
Hpse	0.00161905	0.275143	0.867	0.692	1	IFN-associated monocytes	Hpse
Tap2	0.00166251	0.370615	0.767	0.629	1	IFN-associated monocytes	Tap2
Rasgef1b	0.00174483	0.318503	0.4	0.189	1	IFN-associated monocytes	Rasgef1b
H2-K1	0.00222334	0.286048	1	0.995	1	IFN-associated monocytes	H2-K1
Prpf38a	0.00260407	0.28011	0.633	0.424	1	IFN-associated monocytes	Prpf38a
Fcf1	0.00264694	0.262994	0.767	0.563	1	IFN-associated monocytes	Fcf1
Npc2	0.00264916	0.261344	1	0.999	1	IFN-associated monocytes	Npc2
Gpr65	0.00271074	0.376527	0.933	0.752	1	IFN-associated monocytes	Gpr65
Ccdc86	0.00313799	0.272204	0.767	0.594	1	IFN-associated monocytes	Ccdc86
Itga4	0.00494963	0.290389	0.967	0.965	1	IFN-associated monocytes	Itga4
Ccl2	0.00502736	0.480651	0.333	0.156	1	IFN-associated monocytes	Ccl2
Casp1	0.00524629	0.297684	0.867	0.774	1	IFN-associated monocytes	Casp1
Spon1	0.00624791	0.381931	0.367	0.188	1	IFN-associated monocytes	Spon1
Mxd11	0.00709521	0.278238	0.833	0.615	1	IFN-associated monocytes	Mxd1
Cxcl9	0.00767042	1.20042	0.133	0.039	1	IFN-associated monocytes	Cxcl9
Sell2	0.00882189	0.317329	0.867	0.693	1	IFN-associated monocytes	Sell
Stxbp3	0.00915075	0.281001	0.6	0.53	1	IFN-associated monocytes	Stxbp3
Cyyr1	1.93544e-223	0.822722	0.75	0.007	3.65876e-219	monocyte progenitors	Cyyr1
Ecscr	1.00055e-221	0.7755	0.795	0.009	1.89145e-217	monocyte progenitors	Ecscr
Esam	2.84035e-193	0.879566	0.75	0.01	5.3694e-189	monocyte progenitors	Esam
Podxl	1.78547e-181	0.660571	0.75	0.012	3.37526e-177	monocyte progenitors	Podxl
Nfib	1.76446e-174	0.814659	0.727	0.012	3.33554e-170	monocyte progenitors	Nfib
Cav1	7.9604e-174	1.17104	0.909	0.025	1.50483e-169	monocyte progenitors	Cav1
Cdh5	9.17235e-173	1.31157	0.795	0.017	1.73394e-168	monocyte progenitors	Cdh5
Clec1a	2.07913e-172	0.96608	0.795	0.017	3.93039e-168	monocyte progenitors	Clec1a
Arhgef15	1.14458e-167	0.352559	0.568	0.005	2.16372e-163	monocyte progenitors	Arhgef15
Slco2a1	9.46615e-162	1.22892	0.841	0.023	1.78948e-157	monocyte progenitors	Slco2a1
Tspan7	7.14789e-156	1.15427	0.795	0.021	1.35124e-151	monocyte progenitors	Tspan7
Tjp1	3.97111e-155	0.481007	0.614	0.009	7.50699e-151	monocyte progenitors	Tjp1
Foxf1	2.59034e-153	0.74272	0.636	0.01	4.89678e-149	monocyte progenitors	Foxf1
Aqp1	2.4537e-152	0.962529	0.773	0.02	4.63847e-148	monocyte progenitors	Aqp1
Mfap2	4.01795e-151	0.331769	0.523	0.005	7.59553e-147	monocyte progenitors	Mfap2
Myct1	2.08359e-150	0.482251	0.591	0.008	3.93882e-146	monocyte progenitors	Myct1
Tmem252	9.26901e-150	0.579056	0.477	0.003	1.75221e-145	monocyte progenitors	Tmem252
Sox18	1.17779e-148	0.817704	0.614	0.01	2.22649e-144	monocyte progenitors	Sox18
S1pr1	2.59812e-147	0.835742	0.705	0.016	4.91148e-143	monocyte progenitors	S1pr1
Sema3f	5.60924e-147	0.543176	0.591	0.009	1.06037e-142	monocyte progenitors	Sema3f
Clec14a	8.8364e-147	0.982264	0.727	0.018	1.67043e-142	monocyte progenitors	Clec14a
Tmem100	1.09381e-145	1.18125	0.773	0.022	2.06774e-141	monocyte progenitors	Tmem100
Scn7a	6.64833e-144	0.724547	0.636	0.012	1.2568e-139	monocyte progenitors	Scn7a
Cavin1	8.59489e-144	0.604277	0.682	0.015	1.62478e-139	monocyte progenitors	Cavin1
Acer2	1.13697e-143	0.626037	0.591	0.009	2.14933e-139	monocyte progenitors	Acer2
Pakap.1	1.52276e-143	0.505173	0.591	0.009	2.87862e-139	monocyte progenitors	Pakap.1
Cldn5	6.95218e-142	1.77424	0.932	0.039	1.31424e-137	monocyte progenitors	Cldn5
Tm4sf1	8.87872e-141	0.939524	0.636	0.013	1.67843e-136	monocyte progenitors	Tm4sf1
Gpr182	5.50486e-140	0.390447	0.386	0.001	1.04064e-135	monocyte progenitors	Gpr182
Gja4	5.38165e-138	0.470414	0.432	0.003	1.01735e-133	monocyte progenitors	Gja4
Ptprb	7.41099e-138	1.28743	0.75	0.022	1.40097e-133	monocyte progenitors	Ptprb
Fendrr	3.29915e-136	0.565898	0.568	0.009	6.23671e-132	monocyte progenitors	Fendrr
Kitl	1.06736e-134	0.577513	0.545	0.008	2.01774e-130	monocyte progenitors	Kitl
Lyve1	3.53508e-134	0.930616	0.5	0.006	6.68271e-130	monocyte progenitors	Lyve1
Nkd1	2.65157e-133	0.448261	0.591	0.011	5.01253e-129	monocyte progenitors	Nkd1
Phldb2	7.3176e-132	0.309796	0.432	0.003	1.38332e-127	monocyte progenitors	Phldb2
Dlc1	5.20976e-131	0.419619	0.455	0.004	9.84853e-127	monocyte progenitors	Dlc1
Nedd4	9.36184e-131	0.610013	0.591	0.012	1.76976e-126	monocyte progenitors	Nedd4
Tmem204	3.36599e-130	0.367967	0.455	0.004	6.36306e-126	monocyte progenitors	Tmem204
Lysmd2	1.26394e-129	0.364401	0.5	0.007	2.38934e-125	monocyte progenitors	Lysmd2
Col4a2	1.32531e-129	0.667055	0.568	0.01	2.50537e-125	monocyte progenitors	Col4a2
Gpihbp1	2.97124e-129	1.41947	0.818	0.032	5.61683e-125	monocyte progenitors	Gpihbp1
Fgd5	8.76771e-129	0.305707	0.409	0.003	1.65745e-124	monocyte progenitors	Fgd5
Dll4	3.09042e-126	0.398598	0.386	0.002	5.84212e-122	monocyte progenitors	Dll4
Afap1l1	1.17844e-124	0.374979	0.545	0.01	2.22771e-120	monocyte progenitors	Afap1l1
Clic5	4.79182e-124	0.633918	0.636	0.016	9.05845e-120	monocyte progenitors	Clic5
Plpp3	9.6467e-124	0.475395	0.523	0.009	1.82361e-119	monocyte progenitors	Plpp3
Fermt2	3.22813e-122	0.544854	0.545	0.01	6.10246e-118	monocyte progenitors	Fermt2
Ushbp1	4.60355e-122	0.322637	0.432	0.004	8.70254e-118	monocyte progenitors	Ushbp1
Galnt18	1.78085e-121	0.326504	0.455	0.005	3.36653e-117	monocyte progenitors	Galnt18
Cyp4b1	3.4853e-121	0.608304	0.568	0.012	6.58861e-117	monocyte progenitors	Cyp4b1
Ramp2	2.53495e-120	1.68142	0.886	0.045	4.79206e-116	monocyte progenitors	Ramp2
Egfl7	1.96622e-118	1.68147	0.886	0.046	3.71694e-114	monocyte progenitors	Egfl7
Emcn	4.90859e-118	0.290194	0.409	0.004	9.2792e-114	monocyte progenitors	Emcn
Tbx3	1.52851e-117	0.405858	0.455	0.006	2.8895e-113	monocyte progenitors	Tbx3
Pcdh1	2.06202e-117	0.491453	0.432	0.005	3.89805e-113	monocyte progenitors	Pcdh1
Ctla2a	2.8756e-117	1.51739	0.886	0.045	5.43604e-113	monocyte progenitors	Ctla2a
Grrp1	4.55459e-115	0.413922	0.386	0.003	8.61e-111	monocyte progenitors	Grrp1
Hmcn1	6.17488e-115	0.401224	0.386	0.003	1.1673e-110	monocyte progenitors	Hmcn1
Adgrf5	9.87352e-115	1.27246	0.773	0.033	1.86649e-110	monocyte progenitors	Adgrf5
Tek	9.92531e-115	0.659148	0.545	0.012	1.87628e-110	monocyte progenitors	Tek
Ly6a	1.40441e-113	1.62365	1	0.066	2.6549e-109	monocyte progenitors	Ly6a
Sparc	5.56718e-113	0.91137	0.705	0.026	1.05242e-108	monocyte progenitors	Sparc
Arhgap29	1.71408e-111	0.414476	0.545	0.013	3.2403e-107	monocyte progenitors	Arhgap29
Sema3c	1.34339e-110	0.662713	0.5	0.01	2.53954e-106	monocyte progenitors	Sema3c
Plvap	2.938e-110	1.23436	0.614	0.019	5.554e-106	monocyte progenitors	Plvap
Slc9a3r2	3.79605e-110	0.971229	0.705	0.027	7.17605e-106	monocyte progenitors	Slc9a3r2
Cavin2	4.88157e-110	0.803267	0.636	0.02	9.22812e-106	monocyte progenitors	Cavin2
Bcam	1.48438e-109	0.394255	0.432	0.006	2.80607e-105	monocyte progenitors	Bcam
Adamts1	1.37545e-108	0.519161	0.341	0.002	2.60016e-104	monocyte progenitors	Adamts1
Mcam	1.86517e-107	0.511537	0.455	0.008	3.52593e-103	monocyte progenitors	Mcam
Kit	2.87324e-107	0.641139	0.5	0.01	5.43157e-103	monocyte progenitors	Kit
Hey1	2.18693e-106	0.337555	0.364	0.003	4.13417e-102	monocyte progenitors	Hey1
Ldb2	1.09999e-105	0.341875	0.386	0.004	2.07942e-101	monocyte progenitors	Ldb2
Gata2	2.55188e-105	0.341459	0.409	0.005	4.82408e-101	monocyte progenitors	Gata2
Prex2	1.22351e-104	0.398818	0.5	0.011	2.31293e-100	monocyte progenitors	Prex2
Shank3	7.67209e-103	0.282831	0.341	0.003	1.45033e-98	monocyte progenitors	Shank3
Nckap5	6.59595e-102	0.337752	0.409	0.006	1.2469e-97	monocyte progenitors	Nckap5
Rasgrp3	9.83444e-102	0.320335	0.364	0.004	1.8591e-97	monocyte progenitors	Rasgrp3
Rasgef1a	4.87489e-101	0.467042	0.455	0.009	9.21548e-97	monocyte progenitors	Rasgef1a
Itga3	6.21175e-100	0.262326	0.318	0.002	1.17427e-95	monocyte progenitors	Itga3
Amotl1	7.41985e-100	0.258798	0.318	0.002	1.40265e-95	monocyte progenitors	Amotl1
Myzap	9.15211e-100	0.449653	0.477	0.01	1.73012e-95	monocyte progenitors	Myzap
Tie1	2.62433e-99	0.397506	0.432	0.008	4.96104e-95	monocyte progenitors	Tie1
Efnb2	1.13264e-97	0.451263	0.455	0.009	2.14114e-93	monocyte progenitors	Efnb2
Stmn2	1.13901e-97	0.54509	0.523	0.014	2.15318e-93	monocyte progenitors	Stmn2
Tspan18	1.5323e-97	0.416978	0.386	0.005	2.89667e-93	monocyte progenitors	Tspan18
Bmp6	2.04749e-97	0.299596	0.364	0.004	3.87057e-93	monocyte progenitors	Bmp6
Scn3b	2.40809e-96	0.529602	0.432	0.008	4.55225e-92	monocyte progenitors	Scn3b
Ppp1r16b	4.47372e-96	0.4686	0.523	0.015	8.45713e-92	monocyte progenitors	Ppp1r16b
Fmo1	6.37083e-95	0.460888	0.5	0.013	1.20434e-90	monocyte progenitors	Fmo1
Gm13889	7.0494e-95	0.457994	0.409	0.007	1.33262e-90	monocyte progenitors	Gm13889
Adgrl2	1.33021e-94	0.430465	0.409	0.007	2.51463e-90	monocyte progenitors	Adgrl2
Col4a1	4.9357e-94	0.880845	0.705	0.035	9.33044e-90	monocyte progenitors	Col4a1
Sema6a	7.00434e-94	0.40781	0.386	0.006	1.3241e-89	monocyte progenitors	Sema6a
Ephb4	1.61598e-93	0.293734	0.364	0.005	3.05484e-89	monocyte progenitors	Ephb4
Gimap1	1.84396e-93	0.295039	0.386	0.006	3.48582e-89	monocyte progenitors	Gimap1
Serpinh1	5.0431e-93	0.258095	0.364	0.005	9.53348e-89	monocyte progenitors	Serpinh1
Sash1	1.25947e-92	0.363396	0.477	0.012	2.38091e-88	monocyte progenitors	Sash1
Adrb1	3.48172e-92	0.414176	0.523	0.015	6.58185e-88	monocyte progenitors	Adrb1
Ablim1	1.56438e-91	0.289422	0.409	0.008	2.9573e-87	monocyte progenitors	Ablim1
Cd36	1.10122e-90	1.42099	0.841	0.058	2.08174e-86	monocyte progenitors	Cd36
S100a16	4.07366e-90	0.373396	0.477	0.013	7.70084e-86	monocyte progenitors	S100a16
Sema3g	9.67331e-90	0.358198	0.318	0.003	1.82864e-85	monocyte progenitors	Sema3g
Igfbp7	2.20566e-89	1.07703	0.705	0.037	4.16959e-85	monocyte progenitors	Igfbp7
Dock9	3.73072e-89	0.410567	0.409	0.008	7.05255e-85	monocyte progenitors	Dock9
Plpp1	1.42156e-88	0.637921	0.636	0.028	2.68733e-84	monocyte progenitors	Plpp1
Tspan8	3.1108e-88	0.332615	0.432	0.01	5.88065e-84	monocyte progenitors	Tspan8
Rapgef5	8.59572e-88	0.322581	0.432	0.01	1.62494e-83	monocyte progenitors	Rapgef5
Ddah2	2.02625e-87	0.494746	0.591	0.024	3.83042e-83	monocyte progenitors	Ddah2
Rgs12	1.06264e-86	0.273257	0.386	0.007	2.00882e-82	monocyte progenitors	Rgs12
Hyal2	1.43937e-86	0.530998	0.591	0.024	2.72098e-82	monocyte progenitors	Hyal2
Gstm2	8.37919e-86	0.267731	0.364	0.006	1.584e-81	monocyte progenitors	Gstm2
Cd200	1.2919e-84	0.450528	0.386	0.008	2.44221e-80	monocyte progenitors	Cd200
Gimap4	1.68279e-84	0.36605	0.477	0.014	3.18114e-80	monocyte progenitors	Gimap4
Epas1	2.28032e-84	1.60987	0.977	0.098	4.31071e-80	monocyte progenitors	Epas1
Pmp22	1.72419e-83	0.417984	0.432	0.011	3.25941e-79	monocyte progenitors	Pmp22
Mgll	2.31164e-83	0.364533	0.409	0.009	4.36993e-79	monocyte progenitors	Mgll
Rasip1	4.93368e-82	0.508419	0.545	0.022	9.32663e-78	monocyte progenitors	Rasip1
Rhoj	1.61975e-81	0.331369	0.386	0.008	3.06197e-77	monocyte progenitors	Rhoj
Pcdh17	3.65616e-81	0.615752	0.477	0.015	6.9116e-77	monocyte progenitors	Pcdh17
Car4	4.33683e-80	0.704063	0.455	0.014	8.19834e-76	monocyte progenitors	Car4
Myo6	2.03989e-79	0.302048	0.409	0.01	3.8562e-75	monocyte progenitors	Myo6
Akap12	1.07203e-78	0.29857	0.409	0.01	2.02657e-74	monocyte progenitors	Akap12
Prx	1.10367e-78	0.370671	0.386	0.009	2.08638e-74	monocyte progenitors	Prx
Cxcl12	1.82092e-77	0.406652	0.318	0.005	3.44227e-73	monocyte progenitors	Cxcl12
2022-09-04	1.98011e-75	0.344852	0.432	0.013	3.7432e-71	monocyte progenitors	2022-09-04
Pecam1	8.60562e-74	1.06677	0.864	0.078	1.62681e-69	monocyte progenitors	Pecam1
Efna1	2.30868e-73	0.297942	0.295	0.004	4.36432e-69	monocyte progenitors	Efna1
Sema7a	5.73776e-73	0.26092	0.273	0.003	1.08467e-68	monocyte progenitors	Sema7a
Kdr	9.00215e-73	0.721543	0.568	0.029	1.70177e-68	monocyte progenitors	Kdr
Pdzd2	2.57077e-71	0.346571	0.318	0.006	4.85978e-67	monocyte progenitors	Pdzd2
Aplnr	3.62377e-70	0.337533	0.295	0.005	6.85037e-66	monocyte progenitors	Aplnr
Slc43a3	1.40902e-68	0.595294	0.568	0.031	2.66361e-64	monocyte progenitors	Slc43a3
Calcrl	3.47343e-68	1.58013	0.909	0.107	6.56617e-64	monocyte progenitors	Calcrl
Armcx4	8.6093e-67	0.269783	0.295	0.005	1.6275e-62	monocyte progenitors	Armcx4
Ctla2b	3.5181e-65	0.277144	0.341	0.009	6.65061e-61	monocyte progenitors	Ctla2b
Arhgef12	2.12944e-64	0.648072	0.682	0.053	4.02549e-60	monocyte progenitors	Arhgef12
Ets1	9.46906e-63	0.539986	0.545	0.031	1.79003e-58	monocyte progenitors	Ets1
St5	1.00175e-62	0.293188	0.273	0.005	1.8937e-58	monocyte progenitors	St5
Tns1	1.48872e-62	0.441082	0.477	0.023	2.81428e-58	monocyte progenitors	Tns1
Mylk	3.16084e-61	0.266236	0.341	0.01	5.97524e-57	monocyte progenitors	Mylk
Crim1	2.90285e-60	0.304043	0.364	0.012	5.48755e-56	monocyte progenitors	Crim1
Igfbp4	1.24213e-59	0.597963	0.614	0.044	2.34813e-55	monocyte progenitors	Igfbp4
Sox4	2.1948e-59	0.334497	0.341	0.01	4.14905e-55	monocyte progenitors	Sox4
Jcad	8.48566e-59	0.392285	0.409	0.017	1.60413e-54	monocyte progenitors	Jcad
Jup	8.82067e-59	0.541312	0.659	0.054	1.66746e-54	monocyte progenitors	Jup
Cracr2b	1.2979e-58	0.305434	0.5	0.027	2.45355e-54	monocyte progenitors	Cracr2b
Erg	4.33853e-58	0.277249	0.25	0.004	8.20156e-54	monocyte progenitors	Erg
Gimap6	4.45224e-58	0.364393	0.341	0.011	8.41652e-54	monocyte progenitors	Gimap6
Hspb1	1.20884e-57	0.782247	0.455	0.023	2.28519e-53	monocyte progenitors	Hspb1
Crip2	2.18587e-55	0.755706	0.727	0.074	4.13218e-51	monocyte progenitors	Crip2
Sox17	3.03462e-55	0.270519	0.25	0.005	5.73664e-51	monocyte progenitors	Sox17
Gng11	2.50602e-54	0.609602	0.659	0.058	4.73737e-50	monocyte progenitors	Gng11
Cadm1	5.36407e-54	0.364097	0.341	0.012	1.01402e-49	monocyte progenitors	Cadm1
Rhoc	5.25692e-49	0.352618	0.409	0.022	9.93769e-45	monocyte progenitors	Rhoc
Cnn3	2.12831e-48	0.410461	0.591	0.05	4.02336e-44	monocyte progenitors	Cnn3
Adgrl4	2.88363e-48	0.519364	0.545	0.044	5.45122e-44	monocyte progenitors	Adgrl4
Itga6	4.4612e-48	0.369793	0.341	0.015	8.43345e-44	monocyte progenitors	Itga6
Emp2	5.16557e-47	0.910318	0.477	0.034	9.765e-43	monocyte progenitors	Emp2
Eng	1.96685e-46	1.00011	0.75	0.104	3.71814e-42	monocyte progenitors	Eng
Timp3	1.33365e-45	0.421616	0.25	0.007	2.52113e-41	monocyte progenitors	Timp3
Fnbp1l	5.79387e-44	0.272461	0.341	0.016	1.09527e-39	monocyte progenitors	Fnbp1l
Flt1	3.56884e-43	0.865409	0.75	0.101	6.74653e-39	monocyte progenitors	Flt1
Stab1	4.99607e-42	0.261558	0.386	0.023	9.44457e-38	monocyte progenitors	Stab1
Enho	5.37643e-40	0.26265	0.273	0.011	1.01636e-35	monocyte progenitors	Enho
Adcy4	6.1558e-40	0.36011	0.386	0.025	1.16369e-35	monocyte progenitors	Adcy4
Casz1	1.87515e-38	0.46971	0.523	0.052	3.54478e-34	monocyte progenitors	Casz1
Ccnd1	4.12716e-38	0.333374	0.455	0.038	7.80197e-34	monocyte progenitors	Ccnd1
Edn1	2.66896e-36	0.329099	0.227	0.008	5.0454e-32	monocyte progenitors	Edn1
Icam2	1.46351e-34	0.853096	0.818	0.17	2.76662e-30	monocyte progenitors	Icam2
Tnfsf101	1.95432e-34	0.36669	0.341	0.023	3.69445e-30	monocyte progenitors	Tnfsf10
Efnb1	9.34058e-33	0.354124	0.432	0.041	1.76574e-28	monocyte progenitors	Efnb1
Clstn1	5.82074e-32	0.263925	0.295	0.018	1.10035e-27	monocyte progenitors	Clstn1
Cd9	9.52339e-31	1.0356	0.818	0.19	1.8003e-26	monocyte progenitors	Cd9
St3gal6	5.22207e-30	0.321773	0.409	0.041	9.8718e-26	monocyte progenitors	St3gal6
Smad6	5.62969e-28	0.36697	0.409	0.043	1.06424e-23	monocyte progenitors	Smad6
Heg1	6.90408e-28	0.435133	0.523	0.07	1.30515e-23	monocyte progenitors	Heg1
Arap3	1.47421e-27	0.409528	0.545	0.081	2.78684e-23	monocyte progenitors	Arap3
Iigp11	2.77225e-27	0.803598	0.477	0.06	5.24066e-23	monocyte progenitors	Iigp1
Acvrl1	2.82695e-27	0.898491	0.818	0.245	5.34407e-23	monocyte progenitors	Acvrl1
Cav2	5.20247e-27	0.619386	0.614	0.112	9.83476e-23	monocyte progenitors	Cav2
Zeb1	4.50716e-26	0.304139	0.318	0.027	8.52034e-22	monocyte progenitors	Zeb1
Fzd4	5.96383e-25	0.391818	0.455	0.062	1.1274e-20	monocyte progenitors	Fzd4
Scgb3a1	5.99716e-25	0.480873	0.159	0.006	1.1337e-20	monocyte progenitors	Scgb3a1
Gbp41	1.14296e-24	0.569739	0.682	0.13	2.16065e-20	monocyte progenitors	Gbp4
Ptgfrn	2.43533e-23	0.382989	0.545	0.096	4.60374e-19	monocyte progenitors	Ptgfrn
Hpgd	1.45471e-22	0.770746	0.682	0.144	2.74998e-18	monocyte progenitors	Hpgd
Rtl8a	1.89339e-22	0.531367	0.591	0.121	3.57926e-18	monocyte progenitors	Rtl8a
Cemip2	2.93838e-21	0.576566	0.705	0.187	5.55471e-17	monocyte progenitors	Cemip2
Hilpda	3.35537e-20	0.691261	0.727	0.197	6.34299e-16	monocyte progenitors	Hilpda
Ece1	1.24595e-18	0.608816	0.795	0.294	2.35535e-14	monocyte progenitors	Ece1
Pltp	3.89423e-18	0.867768	0.841	0.318	7.36164e-14	monocyte progenitors	Pltp
Mcf2l	3.9304e-18	0.256785	0.273	0.03	7.43002e-14	monocyte progenitors	Mcf2l
Tmcc2	2.98961e-17	0.374165	0.341	0.049	5.65156e-13	monocyte progenitors	Tmcc2
Eva1b	4.18036e-17	0.328988	0.523	0.116	7.90255e-13	monocyte progenitors	Eva1b
Ly6c12	4.90494e-17	0.979598	1	0.664	9.27231e-13	monocyte progenitors	Ly6c1
Arhgap31	8.98898e-17	0.714516	0.659	0.229	1.69928e-12	monocyte progenitors	Arhgap31
Impdh1	1.55305e-16	0.367286	0.5	0.109	2.93589e-12	monocyte progenitors	Impdh1
Ace	1.8344e-16	0.846053	0.818	0.278	3.46776e-12	monocyte progenitors	Ace
Pitpnc1	2.12039e-16	0.644656	0.659	0.204	4.00839e-12	monocyte progenitors	Pitpnc1
Smagp	2.64282e-16	0.348349	0.545	0.124	4.99599e-12	monocyte progenitors	Smagp
Serpina3g1	3.15269e-16	0.619839	0.455	0.089	5.95985e-12	monocyte progenitors	Serpina3g
Nostrin	4.31717e-16	0.372047	0.545	0.139	8.16118e-12	monocyte progenitors	Nostrin
Cpd1	3.90457e-15	0.453681	0.75	0.253	7.3812e-11	monocyte progenitors	Cpd
Gna11	5.21961e-15	0.258662	0.5	0.11	9.86714e-11	monocyte progenitors	Gna11
Serpinb6a	6.5156e-15	0.310684	0.523	0.126	1.23171e-10	monocyte progenitors	Serpinb6a
Csrp1	1.24723e-14	0.292476	0.455	0.1	2.35776e-10	monocyte progenitors	Csrp1
Id3	5.79621e-14	0.793229	0.818	0.314	1.09572e-09	monocyte progenitors	Id3
Sptbn1	6.6858e-14	0.839138	0.955	0.694	1.26388e-09	monocyte progenitors	Sptbn1
Hdac7	1.02349e-13	0.345121	0.477	0.115	1.93481e-09	monocyte progenitors	Hdac7
Rtl8b	1.35347e-13	0.317797	0.5	0.129	2.5586e-09	monocyte progenitors	Rtl8b
Itga11	1.77004e-13	0.590255	0.727	0.276	3.34608e-09	monocyte progenitors	Itga1
4931406P16Rik	2.27199e-13	0.350845	0.591	0.189	4.29498e-09	monocyte progenitors	4931406P16Rik
Kank3	2.68528e-13	0.3923	0.545	0.156	5.07625e-09	monocyte progenitors	Kank3
Id1	5.48122e-13	0.677689	0.636	0.222	1.03617e-08	monocyte progenitors	Id1
Lpl	6.30985e-13	0.304265	0.295	0.048	1.19281e-08	monocyte progenitors	Lpl
Clec2d1	7.0633e-13	0.781678	0.886	0.582	1.33525e-08	monocyte progenitors	Clec2d
Zbtb20	8.03037e-13	0.40985	0.636	0.2	1.51806e-08	monocyte progenitors	Zbtb20
Cd81	4.31158e-12	0.27898	0.364	0.076	8.1506e-08	monocyte progenitors	Cd81
Bmpr2	5.39295e-12	0.851045	0.864	0.529	1.01948e-07	monocyte progenitors	Bmpr2
Ankrd33b1	1.63319e-11	0.255473	0.364	0.081	3.08738e-07	monocyte progenitors	Ankrd33b
Zbtb4	2.70496e-11	0.255327	0.432	0.106	5.11346e-07	monocyte progenitors	Zbtb4
Vwf	3.45264e-11	0.413668	0.182	0.022	6.52688e-07	monocyte progenitors	Vwf
Fkbp1a	1.10574e-10	0.483096	0.955	0.835	2.09029e-06	monocyte progenitors	Fkbp1a
Ccser2	1.45415e-10	0.286661	0.455	0.132	2.74893e-06	monocyte progenitors	Ccser2
Ehd41	1.60444e-10	0.58353	0.977	0.913	3.03303e-06	monocyte progenitors	Ehd4
Rnf144a	1.87569e-10	0.361298	0.545	0.184	3.54581e-06	monocyte progenitors	Rnf144a
Cd151	2.53584e-10	0.257732	0.5	0.156	4.79376e-06	monocyte progenitors	Cd151
Smad7	4.17512e-10	0.407125	0.682	0.272	7.89265e-06	monocyte progenitors	Smad7
H2-K11	7.27808e-10	0.580898	1	0.995	1.37585e-05	monocyte progenitors	H2-K1
Thbd	8.33256e-10	0.630235	0.773	0.434	1.57519e-05	monocyte progenitors	Thbd
Clic41	1.15206e-09	0.627722	0.75	0.429	2.17785e-05	monocyte progenitors	Clic4
Arhgap5	2.70211e-09	0.280424	0.364	0.098	5.10808e-05	monocyte progenitors	Arhgap5
Arrb1	4.42723e-09	0.332001	0.705	0.314	8.36924e-05	monocyte progenitors	Arrb1
Tspan13	9.03954e-09	0.470078	0.955	0.78	0.000170883	monocyte progenitors	Tspan13
Cyth3	2.45873e-08	0.379475	0.614	0.27	0.000464799	monocyte progenitors	Cyth3
H2-D1	3.76658e-08	0.314703	1	1	0.000712035	monocyte progenitors	H2-D1
Mgp	5.18607e-08	0.540874	0.136	0.018	0.000980374	monocyte progenitors	Mgp
Ehd1	7.10927e-08	0.355111	0.705	0.329	0.00134394	monocyte progenitors	Ehd1
H2-Q7	8.688e-08	0.360327	0.659	0.333	0.00164238	monocyte progenitors	H2-Q7
Wars	1.63214e-07	0.377138	0.705	0.382	0.0030854	monocyte progenitors	Wars
H2-Q4	4.36799e-07	0.368726	0.886	0.647	0.00825726	monocyte progenitors	H2-Q4
Zmynd11	6.43462e-07	0.276822	0.682	0.341	0.012164	monocyte progenitors	Zmynd11
Ccdc85b	7.93391e-07	0.339313	0.795	0.548	0.0149983	monocyte progenitors	Ccdc85b
Tuba1a	8.66463e-07	0.455392	0.932	0.676	0.0163796	monocyte progenitors	Tuba1a
Lpin2	8.70216e-07	0.262314	0.682	0.345	0.0164506	monocyte progenitors	Lpin2
BC028528	9.34837e-07	0.385624	0.955	0.882	0.0176722	monocyte progenitors	BC028528
Rbpms	9.37988e-07	0.322114	0.659	0.316	0.0177317	monocyte progenitors	Rbpms
Afdn	1.20023e-06	0.274047	0.568	0.261	0.0226892	monocyte progenitors	Afdn
Foxp1	1.61806e-06	0.434993	0.955	0.86	0.0305878	monocyte progenitors	Foxp1
Oaz2	2.30254e-06	0.258619	0.705	0.359	0.0435272	monocyte progenitors	Oaz2
Nrp1	2.81777e-06	0.423727	0.682	0.364	0.0532671	monocyte progenitors	Nrp1
Plk2	2.95564e-06	0.300245	0.545	0.234	0.0558734	monocyte progenitors	Plk2
Notch1	3.12884e-06	0.314761	0.841	0.463	0.0591477	monocyte progenitors	Notch1
Slc3a2	4.18987e-06	0.371193	0.955	0.832	0.0792053	monocyte progenitors	Slc3a2
Map4	4.56979e-06	0.263217	0.705	0.373	0.0863873	monocyte progenitors	Map4
Cyb5a	4.71612e-06	0.306151	0.955	0.854	0.0891536	monocyte progenitors	Cyb5a
H2-Q6	5.36663e-06	0.307088	0.523	0.242	0.101451	monocyte progenitors	H2-Q6
Icam1	7.57278e-06	0.353417	0.818	0.521	0.143156	monocyte progenitors	Icam1
Cyb5r3	8.23289e-06	0.398414	0.682	0.396	0.155635	monocyte progenitors	Cyb5r3
Smarca2	1.01664e-05	0.268619	0.659	0.37	0.192186	monocyte progenitors	Smarca2
Ctnnd1	1.26961e-05	0.257418	0.727	0.412	0.240006	monocyte progenitors	Ctnnd1
Dpysl2	3.39228e-05	0.288085	0.727	0.452	0.641277	monocyte progenitors	Dpysl2
Gstm1	4.56327e-05	0.273745	0.773	0.514	0.86264	monocyte progenitors	Gstm1
Cd93	4.70574e-05	0.506189	0.727	0.546	0.889574	monocyte progenitors	Cd93
Guk1	4.93483e-05	0.324246	0.727	0.553	0.93288	monocyte progenitors	Guk1
Tcf4	6.56052e-05	0.382035	0.886	0.683	1	monocyte progenitors	Tcf4
Timp21	8.73025e-05	0.334789	0.591	0.325	1	monocyte progenitors	Timp2
Inmt	8.91945e-05	0.35601	0.159	0.041	1	monocyte progenitors	Inmt
Jun	0.000110752	0.378322	0.977	0.863	1	monocyte progenitors	Jun
Gpx3	0.000145738	0.374865	0.477	0.236	1	monocyte progenitors	Gpx3
Tax1bp1	0.000148896	0.313058	0.977	0.934	1	monocyte progenitors	Tax1bp1
Dennd5b	0.000156697	0.254329	0.364	0.148	1	monocyte progenitors	Dennd5b
Ppp1r21	0.000190995	0.274997	0.909	0.789	1	monocyte progenitors	Ppp1r2
Klf9	0.000253202	0.372347	0.682	0.481	1	monocyte progenitors	Klf9
Anxa3	0.00049916	0.283484	0.682	0.451	1	monocyte progenitors	Anxa3
H2-T231	0.000609309	0.319131	0.977	0.965	1	monocyte progenitors	H2-T23
Gpr146	0.000640538	0.273538	0.773	0.521	1	monocyte progenitors	Gpr146
Ednrb	0.000681072	0.33228	0.205	0.072	1	monocyte progenitors	Ednrb
Sptan1	0.000728537	0.280797	0.75	0.594	1	monocyte progenitors	Sptan1
Ptp4a3	0.00108026	0.360551	0.5	0.291	1	monocyte progenitors	Ptp4a3
Hes1	0.00111262	0.295998	0.545	0.3	1	monocyte progenitors	Hes1
Igtp1	0.00173023	0.318467	0.523	0.332	1	monocyte progenitors	Igtp
Csrp2	0.00231182	0.254929	0.568	0.393	1	monocyte progenitors	Csrp2
Irf11	0.00231931	0.319434	0.864	0.659	1	monocyte progenitors	Irf1
AW1120101	0.00234165	0.346152	0.795	0.639	1	monocyte progenitors	AW112010
Malat11	0.00236905	0.277055	1	0.999	1	monocyte progenitors	Malat1
Cebpd1	0.00257035	0.302573	0.977	0.892	1	monocyte progenitors	Cebpd
Klf7	0.0030403	0.267018	0.568	0.373	1	monocyte progenitors	Klf7
Gbp71	0.00970677	0.314656	0.705	0.51	1	monocyte progenitors	Gbp7
H2-Eb1	2.0819e-167	2.50535	0.809	0.168	3.93562e-163	non-classical monocytes	H2-Eb1
H2-Aa	1.76835e-159	2.39567	0.88	0.288	3.34289e-155	non-classical monocytes	H2-Aa
H2-Ab1	8.30627e-159	2.32652	0.885	0.288	1.57022e-154	non-classical monocytes	H2-Ab1
Bcl2a1a	5.29977e-143	1.0485	0.615	0.079	1.00187e-138	non-classical monocytes	Bcl2a1a
Cd74	1.16189e-142	2.27202	0.938	0.506	2.19644e-138	non-classical monocytes	Cd74
Treml4	9.47551e-132	1.00281	0.775	0.21	1.79125e-127	non-classical monocytes	Treml4
Bcl2a1d	2.38604e-131	1.15717	0.742	0.194	4.51057e-127	non-classical monocytes	Bcl2a1d
Bcl2a1b	3.06126e-130	1.07103	0.569	0.07	5.787e-126	non-classical monocytes	Bcl2a1b
Adgre4	2.12786e-125	0.934196	0.816	0.262	4.0225e-121	non-classical monocytes	Adgre4
H2-K12	1.69632e-113	0.694793	1	0.994	3.20673e-109	non-classical monocytes	H2-K1
H2-DMb1	4.64764e-103	1.19427	0.751	0.27	8.78589e-99	non-classical monocytes	H2-DMb1
Nr1h3	2.2292e-97	0.462065	0.44	0.05	4.21408e-93	non-classical monocytes	Nr1h3
B2m1	1.94335e-96	0.458722	1	1	3.67371e-92	non-classical monocytes	B2m
Pfn1	3.63104e-96	0.426216	1	0.999	6.86412e-92	non-classical monocytes	Pfn1
Aif1	1.03851e-93	1.0195	0.957	0.81	1.96319e-89	non-classical monocytes	Aif1
H2-D11	4.55575e-92	0.433153	1	1	8.61219e-88	non-classical monocytes	H2-D1
Calm1	3.80112e-91	0.593668	1	0.999	7.18564e-87	non-classical monocytes	Calm1
Cxcl16	2.76409e-90	0.555255	0.498	0.086	5.22524e-86	non-classical monocytes	Cxcl16
Ace1	5.19975e-90	0.930024	0.651	0.187	9.82961e-86	non-classical monocytes	Ace
Grk3	9.82534e-90	0.680541	0.844	0.434	1.85738e-85	non-classical monocytes	Grk3
Gngt2	2.33082e-83	0.88323	0.99	0.948	4.40619e-79	non-classical monocytes	Gngt2
Rap1a	3.13686e-82	0.510563	0.998	0.99	5.92993e-78	non-classical monocytes	Rap1a
Cd300c2	3.97757e-81	0.624231	0.988	0.861	7.51919e-77	non-classical monocytes	Cd300c2
Itgax	1.43288e-78	0.342211	0.344	0.032	2.70872e-74	non-classical monocytes	Itgax
Itgal	1.26093e-76	0.682942	0.976	0.897	2.38367e-72	non-classical monocytes	Itgal
Hck	6.21902e-71	0.56078	1	0.946	1.17564e-66	non-classical monocytes	Hck
Eno3	7.75502e-71	0.571695	0.349	0.044	1.46601e-66	non-classical monocytes	Eno3
Tcf7l2	5.80911e-69	0.471929	0.572	0.182	1.09815e-64	non-classical monocytes	Tcf7l2
Efhd2	5.89387e-69	0.491375	0.988	0.944	1.11418e-64	non-classical monocytes	Efhd2
Ciita	2.02797e-67	0.542732	0.636	0.227	3.83368e-63	non-classical monocytes	Ciita
Lst1	7.63422e-67	0.380506	1	1	1.44317e-62	non-classical monocytes	Lst1
H2-DMa	8.01635e-67	0.628713	0.974	0.927	1.51541e-62	non-classical monocytes	H2-DMa
Ctsz	3.58241e-66	0.420332	1	0.998	6.77218e-62	non-classical monocytes	Ctsz
Il2rg	2.03585e-65	0.51234	0.792	0.433	3.84858e-61	non-classical monocytes	Il2rg
H2-Q71	2.09255e-65	0.525877	0.648	0.252	3.95576e-61	non-classical monocytes	H2-Q7
Tgm2	7.46614e-64	0.482058	0.512	0.146	1.4114e-59	non-classical monocytes	Tgm2
Gm2a	9.61859e-64	0.418214	1	0.998	1.8183e-59	non-classical monocytes	Gm2a
Tmem51	1.66746e-63	0.492348	0.833	0.506	3.15216e-59	non-classical monocytes	Tmem51
Calr	1.07975e-61	0.646916	0.978	0.949	2.04115e-57	non-classical monocytes	Calr
Hes11	2.48809e-61	0.647841	0.62	0.216	4.70349e-57	non-classical monocytes	Hes1
Csf1r	3.7405e-61	0.446444	0.995	0.985	7.07104e-57	non-classical monocytes	Csf1r
Atox1	6.55123e-61	0.359442	1	1	1.23845e-56	non-classical monocytes	Atox1
Psmb81	4.24536e-57	0.424306	0.995	0.996	8.02543e-53	non-classical monocytes	Psmb8
Cd274	1.92496e-56	0.397538	0.388	0.083	3.63895e-52	non-classical monocytes	Cd274
Rasgrp1	3.9726e-56	0.305637	0.385	0.083	7.50981e-52	non-classical monocytes	Rasgrp1
Lair1	8.76165e-56	0.528597	0.758	0.408	1.6563e-51	non-classical monocytes	Lair1
Marcksl1	2.56281e-55	1.05763	0.572	0.227	4.84474e-51	non-classical monocytes	Marcksl1
Pilrb2	8.621e-55	0.405164	0.665	0.305	1.62971e-50	non-classical monocytes	Pilrb2
Cst3	1.46745e-53	0.367309	1	0.999	2.77407e-49	non-classical monocytes	Cst3
Metrnl	4.74027e-53	0.565321	0.978	0.944	8.96101e-49	non-classical monocytes	Metrnl
Fyb	1.77807e-52	0.42921	0.993	0.984	3.36126e-48	non-classical monocytes	Fyb
Dusp2	2.18191e-51	0.700776	0.679	0.327	4.12469e-47	non-classical monocytes	Dusp2
Sdc31	2.98295e-51	0.406263	0.56	0.228	5.63897e-47	non-classical monocytes	Sdc3
Cyth31	2.82778e-49	0.43774	0.531	0.206	5.34564e-45	non-classical monocytes	Cyth3
Psme11	7.41405e-49	0.377008	0.995	0.984	1.40155e-44	non-classical monocytes	Psme1
Pmaip1	9.00869e-49	0.584065	0.859	0.619	1.703e-44	non-classical monocytes	Pmaip1
Lilra5	1.2641e-48	0.360052	0.335	0.07	2.38965e-44	non-classical monocytes	Lilra5
Slc12a2	4.87933e-48	0.291209	0.22	0.021	9.22388e-44	non-classical monocytes	Slc12a2
Fam49a	1.0846e-47	0.463915	0.897	0.732	2.05032e-43	non-classical monocytes	Fam49a
Jpt1	3.40559e-47	0.398383	0.988	0.934	6.43793e-43	non-classical monocytes	Jpt1
Traf1	3.47164e-47	0.546991	0.481	0.177	6.5628e-43	non-classical monocytes	Traf1
Acp2	2.26626e-46	0.362353	0.464	0.163	4.28413e-42	non-classical monocytes	Acp2
Slamf81	6.97018e-46	0.342513	0.486	0.17	1.31764e-41	non-classical monocytes	Slamf8
Ctsb	1.15911e-45	0.484418	1	0.998	2.19118e-41	non-classical monocytes	Ctsb
Sema4d1	1.76524e-45	0.411584	0.806	0.532	3.33702e-41	non-classical monocytes	Sema4d
Pilrb1	4.03559e-45	0.345621	0.555	0.23	7.62889e-41	non-classical monocytes	Pilrb1
Spon11	2.64971e-44	0.414559	0.416	0.126	5.00901e-40	non-classical monocytes	Spon1
Smpdl3b	2.25305e-43	0.507076	0.555	0.257	4.25916e-39	non-classical monocytes	Smpdl3b
Ptprj	7.08206e-43	0.402434	0.809	0.607	1.33879e-38	non-classical monocytes	Ptprj
Mapkapk2	9.29296e-43	0.416428	0.983	0.961	1.75674e-38	non-classical monocytes	Mapkapk2
Plek	1.4179e-42	0.592732	0.902	0.778	2.6804e-38	non-classical monocytes	Plek
Hsp90ab1	1.31694e-41	0.457587	1	0.997	2.48955e-37	non-classical monocytes	Hsp90ab1
Ptp4a2	5.77541e-41	0.338661	0.988	0.992	1.09178e-36	non-classical monocytes	Ptp4a2
Tnfrsf1b	3.02637e-40	0.436331	0.947	0.897	5.72106e-36	non-classical monocytes	Tnfrsf1b
Pltp1	1.30379e-39	0.478701	0.577	0.259	2.46468e-35	non-classical monocytes	Pltp
Psme21	3.08082e-39	0.423549	0.986	0.962	5.82399e-35	non-classical monocytes	Psme2
H2-Q41	3.30508e-39	0.392563	0.825	0.603	6.24793e-35	non-classical monocytes	H2-Q4
Hsp90aa1	3.98534e-39	0.461823	0.947	0.886	7.53388e-35	non-classical monocytes	Hsp90aa1
Pilra1	7.50795e-39	0.464054	0.72	0.468	1.4193e-34	non-classical monocytes	Pilra
Arl5c	3.99537e-38	0.503753	0.801	0.566	7.55284e-34	non-classical monocytes	Arl5c
Vasp	8.22538e-38	0.493355	0.902	0.811	1.55493e-33	non-classical monocytes	Vasp
Pot1b	2.26152e-37	0.335638	0.517	0.234	4.27519e-33	non-classical monocytes	Pot1b
H2-Q61	7.03357e-37	0.276639	0.469	0.186	1.32963e-32	non-classical monocytes	H2-Q6
Rasa41	1.79784e-36	0.371763	0.612	0.343	3.39864e-32	non-classical monocytes	Rasa4
Zmiz2	1.93894e-36	0.306069	0.679	0.423	3.66536e-32	non-classical monocytes	Zmiz2
Ptk2b	3.56357e-35	0.372135	0.766	0.554	6.73658e-31	non-classical monocytes	Ptk2b
Sod2	1.35795e-34	0.653087	0.897	0.83	2.56707e-30	non-classical monocytes	Sod2
Sdc4	2.69587e-34	0.314324	0.17	0.019	5.09627e-30	non-classical monocytes	Sdc4
Smc6	4.12384e-34	0.515194	0.811	0.626	7.79571e-30	non-classical monocytes	Smc6
Prkcd	1.89957e-33	0.397883	0.955	0.897	3.59095e-29	non-classical monocytes	Prkcd
Atp1a1	4.75226e-33	0.383832	0.969	0.918	8.98367e-29	non-classical monocytes	Atp1a1
Spi1	5.19651e-33	0.285371	1	0.999	9.82348e-29	non-classical monocytes	Spi1
Plaat3	5.94084e-33	0.356845	0.612	0.331	1.12306e-28	non-classical monocytes	Plaat3
Cfb1	7.87939e-33	0.617144	0.574	0.32	1.48952e-28	non-classical monocytes	Cfb
Mthfs	5.88325e-32	0.312511	0.581	0.323	1.11217e-27	non-classical monocytes	Mthfs
Cd300a	3.71211e-31	0.312164	0.981	0.963	7.01738e-27	non-classical monocytes	Cd300a
Clic42	5.32936e-31	0.345177	0.639	0.378	1.00746e-26	non-classical monocytes	Clic4
Cd300ld	5.85902e-31	0.489075	0.656	0.416	1.10759e-26	non-classical monocytes	Cd300ld
Pik3ap11	7.5284e-31	0.315985	0.734	0.506	1.42317e-26	non-classical monocytes	Pik3ap1
Psmb91	1.03914e-30	0.31447	0.981	0.957	1.96439e-26	non-classical monocytes	Psmb9
Itgb1	4.78991e-30	0.355118	0.931	0.86	9.05484e-26	non-classical monocytes	Itgb1
Ly6e1	5.77225e-30	0.318474	0.981	0.979	1.09119e-25	non-classical monocytes	Ly6e
Clec4a1	2.11766e-29	0.299671	0.981	0.952	4.00323e-25	non-classical monocytes	Clec4a1
Serpina3g2	1.0161e-28	0.355784	0.237	0.058	1.92084e-24	non-classical monocytes	Serpina3g
Hcls1	4.82573e-28	0.287641	0.969	0.943	9.12256e-24	non-classical monocytes	Hcls1
Bbc3	6.31962e-28	0.28061	0.541	0.299	1.19466e-23	non-classical monocytes	Bbc3
Apbb1ip	3.327e-27	0.299138	0.95	0.945	6.28937e-23	non-classical monocytes	Apbb1ip
Slc11a1	1.04783e-26	0.339142	0.768	0.563	1.98082e-22	non-classical monocytes	Slc11a1
Rap1b	1.24818e-26	0.295344	0.998	0.996	2.35956e-22	non-classical monocytes	Rap1b
Rgs1	2.53476e-26	0.418789	0.194	0.041	4.79171e-22	non-classical monocytes	Rgs1
Ehd11	3.69123e-26	0.389768	0.512	0.288	6.97791e-22	non-classical monocytes	Ehd1
Ptprc	1.01516e-25	0.261808	1	1	1.91905e-21	non-classical monocytes	Ptprc
Sdf2l1	1.28372e-25	0.422877	0.785	0.668	2.42675e-21	non-classical monocytes	Sdf2l1
Eif4a1	1.31361e-25	0.257661	0.995	0.996	2.48326e-21	non-classical monocytes	Eif4a1
Abi3	2.04424e-25	0.331946	0.871	0.74	3.86443e-21	non-classical monocytes	Abi3
Spn	2.69009e-25	0.513037	0.505	0.302	5.08534e-21	non-classical monocytes	Spn
Fpr2	3.38501e-25	0.49698	0.512	0.291	6.39901e-21	non-classical monocytes	Fpr2
Nabp1	3.61598e-25	0.384514	0.72	0.555	6.83565e-21	non-classical monocytes	Nabp1
Marcks1	3.78139e-25	0.364087	0.914	0.812	7.14833e-21	non-classical monocytes	Marcks
Ear2	4.91028e-25	0.521304	0.411	0.2	9.2824e-21	non-classical monocytes	Ear2
Bhlhe40	1.49256e-24	0.456028	0.577	0.373	2.82154e-20	non-classical monocytes	Bhlhe40
Ms4a6d1	1.73454e-24	0.308291	0.995	0.994	3.27898e-20	non-classical monocytes	Ms4a6d
Stk10	2.35686e-24	0.43196	0.789	0.659	4.45541e-20	non-classical monocytes	Stk10
Cx3cr1	3.58584e-24	0.487096	0.701	0.523	6.77868e-20	non-classical monocytes	Cx3cr1
Sh3bp1	4.75491e-24	0.283377	0.835	0.712	8.98868e-20	non-classical monocytes	Sh3bp1
Tap11	6.3028e-24	0.299493	0.84	0.702	1.19148e-19	non-classical monocytes	Tap1
Rbpms1	7.52458e-24	0.287883	0.493	0.276	1.42245e-19	non-classical monocytes	Rbpms
Plac81	8.16777e-24	0.270149	1	1	1.54404e-19	non-classical monocytes	Plac8
Gnb1	8.96054e-24	0.262774	0.95	0.908	1.6939e-19	non-classical monocytes	Gnb1
AW1120102	1.76605e-23	0.660469	0.751	0.611	3.33854e-19	non-classical monocytes	AW112010
Hspa51	3.09142e-23	0.37648	0.976	0.968	5.84403e-19	non-classical monocytes	Hspa5
Clec12a	6.11279e-23	0.305244	0.88	0.783	1.15556e-18	non-classical monocytes	Clec12a
H2-T232	7.01982e-23	0.283496	0.981	0.961	1.32703e-18	non-classical monocytes	H2-T23
Pdia3	7.30031e-23	0.337192	0.967	0.96	1.38005e-18	non-classical monocytes	Pdia3
Kras	7.38491e-23	0.301701	0.94	0.888	1.39604e-18	non-classical monocytes	Kras
Srebf2	7.91704e-23	0.269869	0.617	0.421	1.49664e-18	non-classical monocytes	Srebf2
Idi1	1.26752e-22	0.297056	0.423	0.216	2.39612e-18	non-classical monocytes	Idi1
Cxcl91	2.01032e-22	0.757011	0.122	0.017	3.80031e-18	non-classical monocytes	Cxcl9
Tbc1d8	2.81979e-22	0.256217	0.397	0.196	5.33053e-18	non-classical monocytes	Tbc1d8
Rnase61	3.33611e-22	0.329712	0.842	0.706	6.30659e-18	non-classical monocytes	Rnase6
Il1rn	3.56503e-22	0.381864	0.304	0.122	6.73934e-18	non-classical monocytes	Il1rn
Fcgr41	3.73215e-22	0.50236	0.689	0.512	7.05525e-18	non-classical monocytes	Fcgr4
Plgrkt	3.42851e-21	0.297099	0.66	0.488	6.48126e-17	non-classical monocytes	Plgrkt
Id2	3.82084e-21	0.536526	0.835	0.788	7.22292e-17	non-classical monocytes	Id2
Calhm61	9.53639e-21	0.336034	0.555	0.343	1.80276e-16	non-classical monocytes	Calhm6
Ikzf1	9.7293e-21	0.337405	0.833	0.768	1.83923e-16	non-classical monocytes	Ikzf1
Il1b1	1.06758e-20	0.348305	0.976	0.886	2.01814e-16	non-classical monocytes	Il1b
Adam17	2.27552e-20	0.28216	0.861	0.761	4.30165e-16	non-classical monocytes	Adam17
Blvrb	2.54605e-20	0.286934	0.663	0.504	4.81306e-16	non-classical monocytes	Blvrb
Dusp5	4.23645e-20	0.368885	0.696	0.516	8.00859e-16	non-classical monocytes	Dusp5
Hsp90b1	8.56874e-20	0.315657	0.978	0.97	1.61983e-15	non-classical monocytes	Hsp90b1
Ccdc50	1.7673e-19	0.316544	0.801	0.714	3.34091e-15	non-classical monocytes	Ccdc50
Tuba1b	4.90532e-19	0.270914	0.919	0.852	9.27301e-15	non-classical monocytes	Tuba1b
Ppp1r15a1	1.37119e-18	0.286535	0.878	0.758	2.59209e-14	non-classical monocytes	Ppp1r15a
Fyn	1.39361e-18	0.290395	0.419	0.237	2.63448e-14	non-classical monocytes	Fyn
Msn	1.56621e-18	0.256958	0.988	0.997	2.96077e-14	non-classical monocytes	Msn
Selenow1	1.73746e-18	0.279407	0.928	0.873	3.28449e-14	non-classical monocytes	Selenow
Myo1g	4.75248e-18	0.299791	0.816	0.743	8.98409e-14	non-classical monocytes	Myo1g
St13	7.09107e-18	0.254156	0.849	0.75	1.3405e-13	non-classical monocytes	St13
Sat1	8.73348e-18	0.42636	0.995	0.997	1.65098e-13	non-classical monocytes	Sat1
Sppl2a1	1.07311e-17	0.25674	0.876	0.823	2.0286e-13	non-classical monocytes	Sppl2a
Stat11	1.40987e-17	0.366537	0.849	0.774	2.66521e-13	non-classical monocytes	Stat1
Adap1	1.59749e-17	0.255076	0.706	0.59	3.01989e-13	non-classical monocytes	Adap1
Rras	1.68492e-17	0.259933	0.888	0.797	3.18517e-13	non-classical monocytes	Rras
Arl4c	4.20232e-17	0.267186	0.849	0.752	7.94406e-13	non-classical monocytes	Arl4c
Rap1gap2	4.28604e-17	0.298383	0.493	0.339	8.10234e-13	non-classical monocytes	Rap1gap2
Tgif1	7.1833e-17	0.251105	0.667	0.5	1.35793e-12	non-classical monocytes	Tgif1
Evl1	7.83265e-17	0.275979	0.768	0.653	1.48068e-12	non-classical monocytes	Evl
Jarid2	1.85947e-16	0.264085	0.888	0.846	3.51514e-12	non-classical monocytes	Jarid2
Pdia6	2.49872e-16	0.303382	0.923	0.89	4.72358e-12	non-classical monocytes	Pdia6
Ccdc88a	3.41518e-16	0.340312	0.849	0.798	6.45605e-12	non-classical monocytes	Ccdc88a
Ass1	4.62543e-16	0.296953	0.469	0.303	8.7439e-12	non-classical monocytes	Ass1
Ptafr	9.52119e-16	0.401585	0.624	0.496	1.79989e-11	non-classical monocytes	Ptafr
Samsn1	1.59591e-15	0.385534	0.823	0.816	3.0169e-11	non-classical monocytes	Samsn1
Gm21188	1.7663e-15	0.254552	0.83	0.773	3.33901e-11	non-classical monocytes	Gm21188
Cyp51	3.09338e-15	0.262187	0.337	0.181	5.84773e-11	non-classical monocytes	Cyp51
Rnf19b	3.43062e-15	0.253848	0.708	0.586	6.48524e-11	non-classical monocytes	Rnf19b
Apobec1	3.57646e-15	0.272151	0.873	0.83	6.76095e-11	non-classical monocytes	Apobec1
Ppp1cb	3.69635e-15	0.314138	0.756	0.702	6.98759e-11	non-classical monocytes	Ppp1cb
Slc15a3	7.1672e-15	0.264322	0.751	0.639	1.35489e-10	non-classical monocytes	Slc15a3
Cyp4f16	7.52812e-15	0.258798	0.679	0.577	1.42312e-10	non-classical monocytes	Cyp4f16
Pid1	1.17167e-14	0.289873	0.794	0.721	2.21492e-10	non-classical monocytes	Pid1
Rel	1.53308e-14	0.300317	0.797	0.73	2.89813e-10	non-classical monocytes	Rel
Emp3	1.68308e-14	0.314172	0.998	0.998	3.1817e-10	non-classical monocytes	Emp3
Id31	2.59475e-14	0.493463	0.462	0.287	4.90511e-10	non-classical monocytes	Id3
Pim3	2.77723e-14	0.250304	0.593	0.437	5.25008e-10	non-classical monocytes	Pim3
Cdc42ep2	3.007e-14	0.308848	0.447	0.294	5.68444e-10	non-classical monocytes	Cdc42ep2
Itgb5	3.25674e-14	0.259819	0.636	0.484	6.15653e-10	non-classical monocytes	Itgb5
Lpl1	3.26186e-14	0.257426	0.127	0.033	6.16622e-10	non-classical monocytes	Lpl
Acp5	5.69717e-14	0.296824	0.378	0.219	1.07699e-09	non-classical monocytes	Acp5
Ltb1	7.57922e-14	0.26394	0.895	0.815	1.43277e-09	non-classical monocytes	Ltb
Tmem176a	8.22561e-14	0.341817	0.835	0.729	1.55497e-09	non-classical monocytes	Tmem176a
Plekho2	1.0844e-13	0.251803	0.885	0.846	2.04995e-09	non-classical monocytes	Plekho2
Maf1	1.17305e-13	0.320776	0.416	0.259	2.21752e-09	non-classical monocytes	Maf
Ccl5	2.19317e-13	0.258578	0.12	0.031	4.14598e-09	non-classical monocytes	Ccl5
Trem3	9.0358e-13	0.311678	0.603	0.466	1.70813e-08	non-classical monocytes	Trem3
Sgk1	1.35759e-12	0.298827	0.888	0.839	2.56639e-08	non-classical monocytes	Sgk1
Pou2f2	2.90575e-12	0.483054	0.873	0.874	5.49302e-08	non-classical monocytes	Pou2f2
Fdps	3.06091e-12	0.336115	0.584	0.468	5.78634e-08	non-classical monocytes	Fdps
Gbp21	6.9029e-12	0.362258	0.507	0.366	1.30492e-07	non-classical monocytes	Gbp2
Gbp2b1	9.17415e-12	0.373841	0.522	0.366	1.73428e-07	non-classical monocytes	Gbp2b
Ccrl21	1.27721e-11	0.283018	0.734	0.625	2.41444e-07	non-classical monocytes	Ccrl2
Stap1	2.35001e-11	0.281484	0.545	0.428	4.44245e-07	non-classical monocytes	Stap1
Nfkbia1	3.44755e-11	0.41446	0.854	0.776	6.51724e-07	non-classical monocytes	Nfkbia
Malt1	5.66641e-11	0.334797	0.581	0.491	1.07118e-06	non-classical monocytes	Malt1
Prdx5	3.08223e-10	0.335967	1	1	5.82665e-06	non-classical monocytes	Prdx5
Zfp36l1	1.23967e-09	0.336921	0.792	0.716	2.34348e-05	non-classical monocytes	Zfp36l1
Nfe2l2	2.94006e-09	0.281575	0.804	0.773	5.55789e-05	non-classical monocytes	Nfe2l2
Apoe	4.85532e-08	0.298098	0.921	0.847	0.000917849	non-classical monocytes	Apoe
Gpr651	6.53118e-08	0.280167	0.766	0.752	0.00123465	non-classical monocytes	Gpr65
Klf4	2.00031e-06	0.27982	0.856	0.897	0.0378139	non-classical monocytes	Klf4
Ceacam1	6.83063e-06	0.395181	0.651	0.683	0.129126	non-classical monocytes	Ceacam1
Ccl4	0.000186675	0.416506	0.297	0.225	1	non-classical monocytes	Ccl4
Cxcl21	0.00680239	0.286057	0.455	0.402	1	non-classical monocytes	Cxcl2
Ccr2	5.39221e-58	0.353688	1	0.969	1.01934e-53	transitional monocytes	Ccr2
Emb	1.2346e-36	0.26316	0.994	0.942	2.33388e-32	transitional monocytes	Emb
Ahnak	4.06426e-33	0.303021	0.996	0.943	7.68308e-29	transitional monocytes	Ahnak
Gatm	1.1354e-32	0.280309	0.925	0.799	2.14636e-28	transitional monocytes	Gatm
Mgst11	9.6527e-31	0.280983	0.985	0.841	1.82475e-26	transitional monocytes	Mgst1
Vim	2.64916e-27	0.291731	1	0.991	5.00797e-23	transitional monocytes	Vim
Trf	3.49345e-27	0.32085	0.945	0.874	6.60401e-23	transitional monocytes	Trf
Fn11	4.80124e-27	0.291434	0.912	0.656	9.07627e-23	transitional monocytes	Fn1
Gm50022	9.21243e-27	0.255719	0.955	0.886	1.74152e-22	transitional monocytes	Gm50022
Chil3	2.9539e-25	0.669505	0.772	0.627	5.58406e-21	transitional monocytes	Chil3
Tgfbi	8.86886e-23	0.253678	0.983	0.967	1.67657e-18	transitional monocytes	Tgfbi
Cd177	1.2142e-21	0.259439	0.521	0.333	2.29532e-17	transitional monocytes	Cd177
Tppp3	5.35478e-19	0.348464	0.69	0.549	1.01227e-14	transitional monocytes	Tppp3
Apoe1	9.58032e-18	0.359684	0.913	0.807	1.81106e-13	transitional monocytes	Apoe
Saa31	8.93438e-17	0.455633	0.592	0.43	1.68895e-12	transitional monocytes	Saa3
Lrg11	2.24811e-13	0.327654	0.659	0.506	4.24983e-09	transitional monocytes	Lrg1
Cfh	6.74356e-13	0.2789	0.732	0.679	1.2748e-08	transitional monocytes	Cfh
Tmem176b	4.44349e-12	0.280134	0.851	0.774	8.39997e-08	transitional monocytes	Tmem176b
Apoc1	5.74351e-12	0.306766	0.371	0.235	1.08575e-07	transitional monocytes	Apoc1

## Sheet: mon.subclusters.freq
	np	saline
basophils/eosinophils	0.0413081	0.0552408
classical monocytes	0.172978	0.135977
IFN-associated monocytes	0.020654	0.00849858
monocyte progenitors	0.0309811	0.0113314
non-classical monocytes	0.289157	0.116147
transitional monocytes	0.444923	0.672805

## Sheet: dc.markers
	p_val	avg_logFC	pct.1	pct.2	p_val_adj	cluster	gene
Id2	1.34154e-19	0.853523	0.933	0.656	2.53606e-15	activated cDCs	Id2
Prdx5	2.06586e-18	0.707597	0.997	0.938	3.90529e-14	activated cDCs	Prdx5
Fpr2	5.17349e-18	0.77066	0.766	0.375	9.77997e-14	activated cDCs	Fpr2
Fth1	9.58577e-17	0.543245	1	0.994	1.81209e-12	activated cDCs	Fth1
C3	2.05715e-16	0.6865	0.676	0.306	3.88884e-12	activated cDCs	C3
Tnfaip2	6.55167e-16	0.547514	0.84	0.419	1.23853e-11	activated cDCs	Tnfaip2
F10	2.4704e-14	0.540176	0.564	0.175	4.67005e-10	activated cDCs	F10
Sod2	1.52702e-13	0.72341	0.817	0.5	2.88668e-09	activated cDCs	Sod2
Ikbke	2.29599e-12	0.443796	0.369	0.069	4.34034e-08	activated cDCs	Ikbke
Plac8	4.56111e-12	0.427827	0.994	0.981	8.62231e-08	activated cDCs	Plac8
AW112010	8.81151e-12	0.582129	0.821	0.494	1.66573e-07	activated cDCs	AW112010
Atox1	1.1067e-11	0.36105	0.987	0.912	2.09211e-07	activated cDCs	Atox1
Ptafr	1.15511e-11	0.543857	0.468	0.15	2.18363e-07	activated cDCs	Ptafr
Cfb	2.72996e-11	0.553927	0.388	0.094	5.16072e-07	activated cDCs	Cfb
Cd74	3.55772e-11	0.829624	0.84	0.562	6.72552e-07	activated cDCs	Cd74
Hmox1	1.07662e-10	0.685148	0.564	0.25	2.03523e-06	activated cDCs	Hmox1
Smpdl3b	2.09996e-10	0.450928	0.856	0.631	3.96976e-06	activated cDCs	Smpdl3b
H2-Aa	3.09792e-10	0.881663	0.673	0.375	5.85631e-06	activated cDCs	H2-Aa
Cd14	3.74472e-10	0.406201	0.769	0.469	7.07901e-06	activated cDCs	Cd14
Efhd2	3.81181e-10	0.407203	0.971	0.887	7.20584e-06	activated cDCs	Efhd2
H2-Eb1	7.59349e-10	0.848241	0.593	0.269	1.43547e-05	activated cDCs	H2-Eb1
Vim	1.00972e-09	0.55874	0.929	0.756	1.90877e-05	activated cDCs	Vim
Kmt5a	3.55284e-09	0.35057	0.663	0.362	6.71628e-05	activated cDCs	Kmt5a
Fos	4.34342e-09	0.433426	0.99	0.887	8.21079e-05	activated cDCs	Fos
Jaml	5.4393e-09	0.397707	0.619	0.312	0.000102824	activated cDCs	Jaml
Cxcl2	6.56899e-09	0.71358	0.503	0.219	0.00012418	activated cDCs	Cxcl2
Plek	1.20058e-08	0.390591	0.952	0.838	0.000226958	activated cDCs	Plek
H2-Ab1	1.49307e-08	0.765067	0.66	0.381	0.000282249	activated cDCs	H2-Ab1
Ifrd1	1.79026e-08	0.369073	0.612	0.319	0.000338431	activated cDCs	Ifrd1
Rasgrp1	2.12685e-08	0.313319	0.519	0.212	0.000402059	activated cDCs	Rasgrp1
Tmsb10	2.52398e-08	0.39096	0.987	0.975	0.000477134	activated cDCs	Tmsb10
Hpse	4.33643e-08	0.271705	0.442	0.181	0.000819758	activated cDCs	Hpse
Clec4e	4.47665e-08	0.516409	0.75	0.5	0.000846266	activated cDCs	Clec4e
Serpina3g	4.52313e-08	0.363023	0.378	0.125	0.000855052	activated cDCs	Serpina3g
Vamp8	4.77814e-08	0.335891	0.962	0.881	0.00090326	activated cDCs	Vamp8
Ggh	5.79101e-08	0.301075	0.455	0.194	0.00109473	activated cDCs	Ggh
Tlr2	6.2915e-08	0.42005	0.583	0.319	0.00118934	activated cDCs	Tlr2
Ahnak	8.22383e-08	0.462053	0.753	0.5	0.00155463	activated cDCs	Ahnak
Txn1	1.08174e-07	0.27484	0.965	0.881	0.00204493	activated cDCs	Txn1
Stat1	1.08468e-07	0.38599	0.84	0.637	0.00205048	activated cDCs	Stat1
Ass1	1.30633e-07	0.277952	0.295	0.081	0.00246949	activated cDCs	Ass1
Cd302	1.31011e-07	0.359812	0.75	0.512	0.00247663	activated cDCs	Cd302
Dusp1	1.43448e-07	0.372547	0.997	0.981	0.00271175	activated cDCs	Dusp1
Pde4b	1.46122e-07	0.371562	0.772	0.525	0.00276229	activated cDCs	Pde4b
Ets2	1.50031e-07	0.288004	0.712	0.419	0.00283619	activated cDCs	Ets2
Nr1h3	1.87289e-07	0.339284	0.304	0.094	0.00354051	activated cDCs	Nr1h3
Plaat3	1.89156e-07	0.277489	0.471	0.212	0.00357581	activated cDCs	Plaat3
Mcemp1	2.60016e-07	0.29948	0.686	0.381	0.00491534	activated cDCs	Mcemp1
Ubash3b	2.83912e-07	0.310745	0.599	0.344	0.00536707	activated cDCs	Ubash3b
Wnt6	3.32948e-07	0.286868	0.317	0.094	0.00629406	activated cDCs	Wnt6
Ehd1	3.47603e-07	0.367701	0.561	0.288	0.00657109	activated cDCs	Ehd1
Gpr65	4.33192e-07	0.366006	0.651	0.381	0.00818906	activated cDCs	Gpr65
Pgk1	4.96975e-07	0.296142	0.779	0.537	0.00939481	activated cDCs	Pgk1
Gbp2	5.77416e-07	0.371328	0.478	0.225	0.0109155	activated cDCs	Gbp2
Mapkapk2	5.95505e-07	0.289679	0.936	0.806	0.0112574	activated cDCs	Mapkapk2
Psme2	6.20193e-07	0.307196	0.881	0.625	0.0117241	activated cDCs	Psme2
Nfkbia	6.43653e-07	0.334272	0.936	0.775	0.0121676	activated cDCs	Nfkbia
Marcksl1	9.89387e-07	0.564877	0.436	0.2	0.0187034	activated cDCs	Marcksl1
Lyz2	1.4112e-06	0.36517	0.997	0.994	0.0266773	activated cDCs	Lyz2
Tnfaip3	1.70901e-06	0.347229	0.603	0.338	0.0323072	activated cDCs	Tnfaip3
Aif1	2.93721e-06	0.391358	0.606	0.381	0.055525	activated cDCs	Aif1
Pira2	3.60945e-06	0.270133	0.66	0.406	0.068233	activated cDCs	Pira2
Man2a1	3.96634e-06	0.303788	0.779	0.531	0.0749797	activated cDCs	Man2a1
Cd44	4.00348e-06	0.261774	0.952	0.875	0.0756817	activated cDCs	Cd44
Lgals3	4.04636e-06	0.274423	0.968	0.944	0.0764924	activated cDCs	Lgals3
Arl5c	6.40081e-06	0.266367	0.731	0.462	0.121001	activated cDCs	Arl5c
Mpeg1	7.2551e-06	0.28779	0.968	0.844	0.13715	activated cDCs	Mpeg1
Il1rn	1.08417e-05	0.280966	0.24	0.075	0.204951	activated cDCs	Il1rn
Iigp1	1.09174e-05	0.25627	0.138	0.013	0.206382	activated cDCs	Iigp1
Ccrl2	1.17138e-05	0.32983	0.776	0.556	0.221437	activated cDCs	Ccrl2
Nfe2l2	1.17707e-05	0.290661	0.849	0.65	0.222513	activated cDCs	Nfe2l2
Traf1	1.24362e-05	0.267814	0.737	0.5	0.235093	activated cDCs	Traf1
Vasp	1.35321e-05	0.284276	0.92	0.781	0.25581	activated cDCs	Vasp
Hsp90ab1	1.79963e-05	0.252999	0.994	0.963	0.340202	activated cDCs	Hsp90ab1
Acp2	2.25332e-05	0.27195	0.455	0.231	0.425967	activated cDCs	Acp2
Ninj1	2.31825e-05	0.279711	0.407	0.206	0.438242	activated cDCs	Ninj1
Atp6v1b2	3.375e-05	0.257377	0.785	0.562	0.63801	activated cDCs	Atp6v1b2
Tap1	3.37546e-05	0.259453	0.686	0.419	0.638097	activated cDCs	Tap1
Raf1	3.61266e-05	0.252196	0.747	0.55	0.682938	activated cDCs	Raf1
Ncf1	4.34793e-05	0.258505	0.673	0.462	0.821932	activated cDCs	Ncf1
Plaur	4.37436e-05	0.269013	0.859	0.675	0.826928	activated cDCs	Plaur
Cstb	5.46809e-05	0.278899	0.628	0.381	1	activated cDCs	Cstb
Ms4a6d	5.54092e-05	0.369779	0.91	0.825	1	activated cDCs	Ms4a6d
Txnrd1	6.12821e-05	0.294577	0.446	0.256	1	activated cDCs	Txnrd1
Bcl2a1b	0.000129178	0.383824	0.878	0.762	1	activated cDCs	Bcl2a1b
Slc15a3	0.000135917	0.279091	0.679	0.469	1	activated cDCs	Slc15a3
Irak3	0.000135923	0.257954	0.474	0.281	1	activated cDCs	Irak3
Cited2	0.00014928	0.306332	0.747	0.556	1	activated cDCs	Cited2
Fpr1	0.000180137	0.275747	0.288	0.131	1	activated cDCs	Fpr1
Slpi	0.000259157	0.372006	0.365	0.194	1	activated cDCs	Slpi
Ms4a4c	0.000362454	0.252219	0.696	0.469	1	activated cDCs	Ms4a4c
Tnip1	0.000875349	0.256052	0.564	0.381	1	activated cDCs	Tnip1
Gpr141	0.000915837	0.251819	0.817	0.662	1	activated cDCs	Gpr141
Lmo4	0.000998349	0.256155	0.888	0.794	1	activated cDCs	Lmo4
Emp3	0.0014769	0.250381	0.933	0.869	1	activated cDCs	Emp3
H2-DMb1	0.00164746	0.308009	0.24	0.119	1	activated cDCs	H2-DMb1
Rgs1	0.00179095	0.371547	0.391	0.25	1	activated cDCs	Rgs1
Lpl	0.003149	0.361166	0.173	0.075	1	activated cDCs	Lpl
Ifi27l2a	0.00395141	0.282725	0.788	0.631	1	activated cDCs	Ifi27l2a
Hp	0.00486137	0.284049	0.875	0.8	1	activated cDCs	Hp
S100a4	0.00504788	0.286234	0.849	0.8	1	activated cDCs	S100a4
Apoe	9.91645e-14	0.661077	0.945	0.865	1.87461e-09	cDCs	Apoe
Hfe	8.67814e-13	0.477647	0.849	0.696	1.64052e-08	cDCs	Hfe
Smc6	9.10286e-12	0.451166	0.973	0.929	1.72081e-07	cDCs	Smc6
Trf	4.11088e-11	0.457694	0.952	0.902	7.7712e-07	cDCs	Trf
Serpinb6a	5.91996e-11	0.51048	0.596	0.328	1.11911e-06	cDCs	Serpinb6a
Fcgrt	7.70925e-11	0.487889	0.795	0.687	1.45736e-06	cDCs	Fcgrt
Cd72	8.01327e-09	0.444558	0.226	0.055	0.000151483	cDCs	Cd72
Stk38	1.1955e-08	0.408337	0.911	0.847	0.000225998	cDCs	Stk38
Fabp4	1.62962e-08	0.660607	0.644	0.445	0.000308063	cDCs	Fabp4
Cd300e	2.54328e-08	0.361344	0.911	0.718	0.000480782	cDCs	Cd300e
Ighm	4.35702e-08	0.436105	0.452	0.245	0.000823651	cDCs	Ighm
Itgax	5.0998e-08	0.46241	0.699	0.586	0.000964066	cDCs	Itgax
Mbnl1	5.28538e-08	0.315942	0.925	0.905	0.000999149	cDCs	Mbnl1
Fxyd5	7.40249e-08	0.291805	0.993	0.982	0.00139937	cDCs	Fxyd5
Cd9	1.17637e-07	0.379632	0.856	0.807	0.00222381	cDCs	Cd9
Fcgr4	1.24624e-07	0.333434	0.959	0.923	0.00235589	cDCs	Fcgr4
Tgfbr3	1.42043e-07	0.362144	0.336	0.138	0.00268518	cDCs	Tgfbr3
Pltp	1.62562e-07	0.519507	0.671	0.567	0.00307307	cDCs	Pltp
Cd244a	3.15072e-07	0.36353	0.836	0.773	0.00595612	cDCs	Cd244a
Scgb1a1	3.29628e-07	0.407566	0.212	0.061	0.00623128	cDCs	Scgb1a1
Cfh	5.55382e-07	0.484412	0.623	0.463	0.0104989	cDCs	Cfh
Clec2i	9.44446e-07	0.393657	0.425	0.242	0.0178538	cDCs	Clec2i
Arhgap45	1.09343e-06	0.333542	0.74	0.644	0.0206703	cDCs	Arhgap45
Malat1	1.35608e-06	0.289344	1	1	0.0256354	cDCs	Malat1
Wnk1	2.6306e-06	0.261883	0.788	0.745	0.0497288	cDCs	Wnk1
Dpep2	2.8385e-06	0.438917	0.377	0.206	0.0536589	cDCs	Dpep2
Ear2	3.56006e-06	0.357695	0.904	0.807	0.0672994	cDCs	Ear2
Ccl9	7.81476e-06	0.366937	0.637	0.469	0.14773	cDCs	Ccl9
Lilra5	9.86245e-06	0.374552	0.801	0.739	0.18644	cDCs	Lilra5
Mef2c	1.1134e-05	0.356507	0.781	0.718	0.210477	cDCs	Mef2c
S1pr5	1.15668e-05	0.381838	0.541	0.408	0.218658	cDCs	S1pr5
Clec2d	1.53215e-05	0.290968	0.767	0.733	0.289638	cDCs	Clec2d
Crlf2	1.58004e-05	0.303011	0.733	0.681	0.298691	cDCs	Crlf2
Ets1	1.76412e-05	0.440136	0.425	0.282	0.33349	cDCs	Ets1
Krt80	1.8165e-05	0.340353	0.76	0.647	0.343391	cDCs	Krt80
Rsrp1	1.84578e-05	0.278049	0.959	0.933	0.348926	cDCs	Rsrp1
Rcn3	1.88361e-05	0.293202	0.171	0.052	0.356078	cDCs	Rcn3
Maml3	1.91789e-05	0.342471	0.329	0.184	0.362557	cDCs	Maml3
Tm6sf1	1.98874e-05	0.304927	0.76	0.721	0.375951	cDCs	Tm6sf1
Cd2ap	2.42662e-05	0.309875	0.74	0.693	0.458729	cDCs	Cd2ap
Plbd1	3.38917e-05	0.275967	0.712	0.607	0.640689	cDCs	Plbd1
Gda	4.1467e-05	0.368896	0.774	0.678	0.783892	cDCs	Gda
Ssh2	4.35129e-05	0.296399	0.89	0.85	0.822567	cDCs	Ssh2
Cux1	4.57677e-05	0.292823	0.534	0.423	0.865193	cDCs	Cux1
Runx1	5.30049e-05	0.324254	0.596	0.54	1	cDCs	Runx1
Fem1c	5.3901e-05	0.317423	0.575	0.488	1	cDCs	Fem1c
Epsti1	5.45486e-05	0.317911	0.541	0.445	1	cDCs	Epsti1
Fus	6.02432e-05	0.286819	0.884	0.859	1	cDCs	Fus
Clec4b1	6.1599e-05	0.284441	0.212	0.089	1	cDCs	Clec4b1
B4galnt1	6.30747e-05	0.284611	0.822	0.801	1	cDCs	B4galnt1
Smagp	7.41491e-05	0.312032	0.568	0.485	1	cDCs	Smagp
Arhgap39	8.03114e-05	0.373625	0.438	0.328	1	cDCs	Arhgap39
Stap1	8.05184e-05	0.250691	0.932	0.88	1	cDCs	Stap1
Tgfbr1	0.000103089	0.331733	0.616	0.558	1	cDCs	Tgfbr1
Ehd4	0.000115897	0.307686	0.774	0.788	1	cDCs	Ehd4
Tle5	0.000153643	0.256374	0.753	0.718	1	cDCs	Tle5
Mapkap1	0.000200328	0.285052	0.493	0.399	1	cDCs	Mapkap1
Sipa1l1	0.000207253	0.301324	0.507	0.39	1	cDCs	Sipa1l1
Neurl3	0.000208656	0.314078	0.671	0.635	1	cDCs	Neurl3
Inpp5f	0.000327568	0.334518	0.541	0.451	1	cDCs	Inpp5f
Slc12a2	0.000330257	0.40166	0.712	0.666	1	cDCs	Slc12a2
Atp1a3	0.000343529	0.322172	0.582	0.531	1	cDCs	Atp1a3
Cbfa2t3	0.00039078	0.327882	0.658	0.638	1	cDCs	Cbfa2t3
Susd3	0.000545289	0.298196	0.644	0.589	1	cDCs	Susd3
Arglu1	0.000665143	0.293562	0.637	0.626	1	cDCs	Arglu1
Nfatc3	0.000824544	0.294207	0.555	0.491	1	cDCs	Nfatc3
Zcchc7	0.000917932	0.252979	0.541	0.469	1	cDCs	Zcchc7
Hpgd	0.00129192	0.549231	0.247	0.147	1	cDCs	Hpgd
Tnfaip8l2	0.00177484	0.253713	0.616	0.561	1	cDCs	Tnfaip8l2
Herc4	0.00186434	0.29627	0.685	0.656	1	cDCs	Herc4
Stx16	0.00232823	0.286184	0.507	0.482	1	cDCs	Stx16
Eps8	0.00243352	0.25211	0.349	0.255	1	cDCs	Eps8
Sephs2	0.00304495	0.267008	0.432	0.368	1	cDCs	Sephs2
Ankrd11	0.00387383	0.264043	0.705	0.733	1	cDCs	Ankrd11
Ythdc1	0.00391618	0.266721	0.596	0.583	1	cDCs	Ythdc1
Chd9	0.00436599	0.306966	0.473	0.429	1	cDCs	Chd9
Chic2	0.00586605	0.262648	0.568	0.561	1	cDCs	Chic2
Ccr2	0.00593848	0.283814	0.562	0.5	1	cDCs	Ccr2
Mirt2	1.97644e-67	0.536866	0.714	0.002	3.73626e-63	inflammatory DCs	Mirt2
Steap4	3.16673e-63	1.29575	0.929	0.015	5.98638e-59	inflammatory DCs	Steap4
Slc40a1	3.55941e-62	0.770466	0.857	0.011	6.7287e-58	inflammatory DCs	Slc40a1
Mmp9	1.87088e-54	0.905827	0.929	0.022	3.53672e-50	inflammatory DCs	Mmp9
Mrgpra2b	1.68711e-47	0.696268	0.571	0.004	3.18932e-43	inflammatory DCs	Mrgpra2b
Cxcr2	6.79229e-47	1.77039	0.929	0.033	1.28401e-42	inflammatory DCs	Cxcr2
Nlrp12	5.06509e-45	0.361027	0.429	0	9.57504e-41	inflammatory DCs	Nlrp12
Chil1	5.08728e-43	1.07541	0.786	0.022	9.617e-39	inflammatory DCs	Chil1
Ccr1	5.7481e-42	1.21037	1	0.048	1.08662e-37	inflammatory DCs	Ccr1
Sell	5.43004e-39	0.981418	1	0.05	1.0265e-34	inflammatory DCs	Sell
Il1f9	8.61682e-37	0.456958	0.643	0.015	1.62892e-32	inflammatory DCs	Il1f9
Il1r2	1.92501e-36	0.388185	0.5	0.007	3.63904e-32	inflammatory DCs	Il1r2
Tarm1	2.59336e-36	0.436259	0.571	0.011	4.90248e-32	inflammatory DCs	Tarm1
Csf1	1.18971e-32	0.460535	0.643	0.02	2.24903e-28	inflammatory DCs	Csf1
Hdc	1.48483e-32	2.07403	1	0.079	2.80691e-28	inflammatory DCs	Hdc
Dhrs9	2.15579e-31	0.271939	0.357	0.002	4.0753e-27	inflammatory DCs	Dhrs9
Ptgs2	1.53992e-28	1.0746	0.857	0.055	2.91106e-24	inflammatory DCs	Ptgs2
Igfbp6	2.56076e-27	1.22244	0.929	0.072	4.84086e-23	inflammatory DCs	Igfbp6
Slc2a3	5.46866e-26	0.357044	0.643	0.028	1.0338e-21	inflammatory DCs	Slc2a3
AA467197	1.35992e-25	0.420083	0.5	0.015	2.57079e-21	inflammatory DCs	AA467197
Adam19	2.23939e-25	0.378086	0.5	0.015	4.23334e-21	inflammatory DCs	Adam19
Tmem154	2.23939e-25	0.294812	0.5	0.015	4.23334e-21	inflammatory DCs	Tmem154
Gm568	1.93773e-24	0.26303	0.286	0.002	3.66309e-20	inflammatory DCs	Gm568
Asprv1	1.26441e-22	1.21462	0.643	0.039	2.39025e-18	inflammatory DCs	Asprv1
Cd24a	1.57097e-21	0.718618	0.714	0.055	2.96975e-17	inflammatory DCs	Cd24a
Klra17	5.90732e-21	0.271419	0.357	0.009	1.11672e-16	inflammatory DCs	Klra17
Fabp5	1.07245e-20	0.355406	0.643	0.039	2.02735e-16	inflammatory DCs	Fabp5
Wfdc21	4.48145e-20	2.2851	1	0.159	8.47173e-16	inflammatory DCs	Wfdc21
Lrg1	9.23052e-20	1.80638	0.929	0.127	1.74494e-15	inflammatory DCs	Lrg1
Rflnb	1.30439e-17	0.406468	0.5	0.028	2.46583e-13	inflammatory DCs	Rflnb
Mrgpra2a	1.60769e-17	0.285187	0.214	0.002	3.03918e-13	inflammatory DCs	Mrgpra2a
Siglecf	1.60769e-17	0.279852	0.214	0.002	3.03918e-13	inflammatory DCs	Siglecf
Lcn2	2.59822e-17	1.83806	0.929	0.142	4.91167e-13	inflammatory DCs	Lcn2
Slfn4	5.56188e-17	0.735506	0.643	0.057	1.05142e-12	inflammatory DCs	Slfn4
Arg2	6.89965e-17	0.643566	0.857	0.1	1.30431e-12	inflammatory DCs	Arg2
Cstdc4	7.95046e-17	1.85312	0.714	0.079	1.50295e-12	inflammatory DCs	Cstdc4
Iqsec1	9.74951e-17	0.513655	0.857	0.096	1.84305e-12	inflammatory DCs	Iqsec1
Cd33	1.16544e-16	0.55792	0.643	0.057	2.20314e-12	inflammatory DCs	Cd33
Spon1	3.90512e-16	0.539582	0.5	0.033	7.38224e-12	inflammatory DCs	Spon1
Csta3	6.03865e-16	0.268017	0.143	0	1.14155e-11	inflammatory DCs	Csta3
Fgl2	1.04077e-15	1.04429	1	0.166	1.96746e-11	inflammatory DCs	Fgl2
Ly6g	2.61974e-15	0.258249	0.357	0.015	4.95235e-11	inflammatory DCs	Ly6g
Rtp4	5.57027e-15	0.726193	0.786	0.103	1.053e-10	inflammatory DCs	Rtp4
Stfa2l1	7.66041e-15	1.89137	0.571	0.055	1.44812e-10	inflammatory DCs	Stfa2l1
Adam8	1.97479e-14	0.44877	0.571	0.052	3.73314e-10	inflammatory DCs	Adam8
Scimp	1.98958e-14	0.405521	0.357	0.017	3.7611e-10	inflammatory DCs	Scimp
Cd84	7.2736e-14	0.733474	0.786	0.114	1.375e-09	inflammatory DCs	Cd84
Ifit1	9.79631e-14	0.414723	0.286	0.011	1.85189e-09	inflammatory DCs	Ifit1
Retnlg	1.41852e-13	2.08196	0.857	0.166	2.68157e-09	inflammatory DCs	Retnlg
Stfa2	1.9926e-13	1.28692	0.429	0.031	3.7668e-09	inflammatory DCs	Stfa2
Mmp8	2.46506e-13	0.683781	0.429	0.031	4.65995e-09	inflammatory DCs	Mmp8
Ifitm1	2.05728e-12	2.83059	1	0.341	3.88907e-08	inflammatory DCs	Ifitm1
Tnfsf14	3.21393e-12	0.307932	0.357	0.022	6.07561e-08	inflammatory DCs	Tnfsf14
Egr3	3.27222e-12	0.384018	0.286	0.013	6.18581e-08	inflammatory DCs	Egr3
Clec4d	3.66059e-12	0.699134	0.929	0.172	6.91998e-08	inflammatory DCs	Clec4d
Lmnb1	1.23885e-11	0.680824	0.857	0.164	2.34193e-07	inflammatory DCs	Lmnb1
Isg15	1.46035e-11	1.53274	0.786	0.155	2.76065e-07	inflammatory DCs	Isg15
Oas2	1.67972e-11	0.31879	0.5	0.048	3.17535e-07	inflammatory DCs	Oas2
Mxd1	3.42461e-11	1.26678	1	0.38	6.47388e-07	inflammatory DCs	Mxd1
Gm16556	4.03534e-11	0.307507	0.286	0.015	7.6284e-07	inflammatory DCs	Gm16556
Clec5a	5.35136e-11	0.259192	0.429	0.037	1.01162e-06	inflammatory DCs	Clec5a
Slfn5	2.36503e-10	0.613482	0.571	0.079	4.47086e-06	inflammatory DCs	Slfn5
Trim30b	3.27403e-10	0.345508	0.5	0.055	6.18922e-06	inflammatory DCs	Trim30b
Acod1	3.42196e-10	0.696656	0.714	0.127	6.46888e-06	inflammatory DCs	Acod1
Gm16096	3.78187e-10	0.300468	0.286	0.017	7.14925e-06	inflammatory DCs	Gm16096
Hcar2	4.78769e-10	0.603286	0.429	0.044	9.05065e-06	inflammatory DCs	Hcar2
S100a9	5.94194e-10	3.73075	1	0.934	1.12326e-05	inflammatory DCs	S100a9
Slco3a1	9.64196e-10	0.270953	0.429	0.044	1.82272e-05	inflammatory DCs	Slco3a1
Slfn1	9.70122e-10	0.684599	0.857	0.183	1.83392e-05	inflammatory DCs	Slfn1
Oasl2	1.49816e-09	0.470132	0.286	0.02	2.83213e-05	inflammatory DCs	Oasl2
Gbp7	2.0774e-09	0.819767	0.929	0.205	3.92711e-05	inflammatory DCs	Gbp7
S100a8	2.66926e-09	3.45015	1	0.906	5.04596e-05	inflammatory DCs	S100a8
Oas3	2.94366e-09	0.671794	0.714	0.131	5.5647e-05	inflammatory DCs	Oas3
Rsad2	3.18808e-09	0.58581	0.357	0.033	6.02674e-05	inflammatory DCs	Rsad2
Csf3r	4.1123e-09	1.22418	1	0.596	7.7739e-05	inflammatory DCs	Csf3r
Wfdc17	4.21828e-09	2.08299	1	0.76	7.97423e-05	inflammatory DCs	Wfdc17
Grina	4.56429e-09	1.08544	1	0.672	8.62833e-05	inflammatory DCs	Grina
Il1b	6.34829e-09	1.18474	1	0.974	0.000120008	inflammatory DCs	Il1b
Ppp1r3b	1.10529e-08	0.314137	0.571	0.085	0.000208944	inflammatory DCs	Ppp1r3b
Ggt5	1.13583e-08	0.262332	0.286	0.022	0.000214718	inflammatory DCs	Ggt5
Egr1	1.3549e-08	1.04777	1	0.295	0.000256131	inflammatory DCs	Egr1
S100a11	1.47815e-08	1.13177	1	0.884	0.000279429	inflammatory DCs	S100a11
Dhrs7	2.3175e-08	0.765337	0.857	0.234	0.0004381	inflammatory DCs	Dhrs7
Gm47230	2.75678e-08	0.275899	0.143	0.004	0.000521143	inflammatory DCs	Gm47230
Casp9	6.19168e-08	0.303649	0.714	0.133	0.00117048	inflammatory DCs	Casp9
Tacstd2	6.4246e-08	0.356045	0.429	0.057	0.00121451	inflammatory DCs	Tacstd2
Sfxn5	8.2812e-08	0.285465	0.5	0.074	0.00156548	inflammatory DCs	Sfxn5
Pak1	8.99967e-08	0.331592	0.643	0.118	0.0017013	inflammatory DCs	Pak1
1600014C10Rik	9.12796e-08	0.307349	0.714	0.135	0.00172555	inflammatory DCs	1600014C10Rik
Junb	1.02664e-07	0.80778	1	0.978	0.00194076	inflammatory DCs	Junb
Cstdc5	1.35662e-07	2.21889	0.714	0.216	0.00256456	inflammatory DCs	Cstdc5
Hist1h2bc	1.42758e-07	0.525856	0.571	0.105	0.0026987	inflammatory DCs	Hist1h2bc
Tmem140	1.88533e-07	0.363169	0.5	0.079	0.00356403	inflammatory DCs	Tmem140
H2-T24	2.09957e-07	0.264559	0.429	0.059	0.00396903	inflammatory DCs	H2-T24
Ddit3	2.63634e-07	0.385626	0.786	0.172	0.00498374	inflammatory DCs	Ddit3
Ankrd37	2.66703e-07	0.266803	0.429	0.061	0.00504174	inflammatory DCs	Ankrd37
Dgat2	3.01297e-07	0.256493	0.5	0.079	0.00569572	inflammatory DCs	Dgat2
Ier3	3.31969e-07	1.23854	0.643	0.153	0.00627554	inflammatory DCs	Ier3
Cd300lf	4.7181e-07	0.76635	0.929	0.395	0.00891909	inflammatory DCs	Cd300lf
Trem1	5.5043e-07	0.704417	1	0.478	0.0104053	inflammatory DCs	Trem1
Map1lc3b	5.76654e-07	0.689995	1	0.854	0.0109011	inflammatory DCs	Map1lc3b
H2-DMb11	6.04073e-07	0.794279	0.714	0.183	0.0114194	inflammatory DCs	H2-DMb1
Glrx	6.67122e-07	0.679191	1	0.376	0.0126113	inflammatory DCs	Glrx
Arrdc4	7.08525e-07	0.399671	0.643	0.135	0.013394	inflammatory DCs	Arrdc4
B4galt3	9.29733e-07	0.332324	0.5	0.087	0.0175757	inflammatory DCs	B4galt3
Cxcl9	1.03335e-06	0.253007	0.143	0.007	0.0195344	inflammatory DCs	Cxcl9
Cebpd	1.2007e-06	1.05599	0.929	0.498	0.022698	inflammatory DCs	Cebpd
Anxa1	1.38193e-06	0.758874	1	0.585	0.026124	inflammatory DCs	Anxa1
Cfp	1.52613e-06	0.361494	0.714	0.168	0.02885	inflammatory DCs	Cfp
Slpi1	1.60614e-06	0.343894	0.929	0.288	0.0303625	inflammatory DCs	Slpi
Cd52	1.64133e-06	0.676677	1	0.943	0.0310277	inflammatory DCs	Cd52
Gng2	2.33761e-06	0.44262	0.714	0.183	0.0441902	inflammatory DCs	Gng2
Hmgb2	2.67972e-06	0.54202	1	0.934	0.0506574	inflammatory DCs	Hmgb2
Cxcl21	2.80207e-06	1.35363	0.929	0.391	0.0529704	inflammatory DCs	Cxcl2
Entpd1	2.85321e-06	0.296941	0.857	0.214	0.0539371	inflammatory DCs	Entpd1
Nfkbid	3.61152e-06	0.354614	0.714	0.177	0.0682722	inflammatory DCs	Nfkbid
Tspo	3.92528e-06	0.67342	1	0.862	0.0742035	inflammatory DCs	Tspo
Upp1	4.01302e-06	0.751266	0.643	0.17	0.075862	inflammatory DCs	Upp1
Samd9l	5.0346e-06	0.481344	0.929	0.286	0.0951741	inflammatory DCs	Samd9l
Armc7	6.85939e-06	0.315677	0.5	0.1	0.12967	inflammatory DCs	Armc7
Hk3	7.52302e-06	0.265222	0.714	0.17	0.142215	inflammatory DCs	Hk3
Smox	8.58621e-06	0.342439	0.643	0.151	0.162314	inflammatory DCs	Smox
AI839979	9.15122e-06	0.255182	0.5	0.1	0.172995	inflammatory DCs	AI839979
Ly6c2	1.0014e-05	0.432368	0.571	0.129	0.189304	inflammatory DCs	Ly6c2
Csrnp1	1.03514e-05	0.684792	0.929	0.349	0.195683	inflammatory DCs	Csrnp1
Mtus1	1.13306e-05	0.498582	0.786	0.245	0.214194	inflammatory DCs	Mtus1
Cd141	1.16567e-05	1.02283	1	0.657	0.220358	inflammatory DCs	Cd14
Nlrp3	1.28662e-05	0.461551	0.857	0.262	0.243222	inflammatory DCs	Nlrp3
Txn11	1.38761e-05	0.76196	1	0.934	0.262313	inflammatory DCs	Txn1
Ube2h	1.74752e-05	0.519217	0.786	0.312	0.330352	inflammatory DCs	Ube2h
Clec4a2	1.9036e-05	0.447624	0.786	0.236	0.359857	inflammatory DCs	Clec4a2
Gbp2b	2.00048e-05	0.890372	0.786	0.321	0.378171	inflammatory DCs	Gbp2b
Gbp21	2.06718e-05	0.780325	0.857	0.378	0.39078	inflammatory DCs	Gbp2
Pigc	2.10944e-05	0.263292	0.571	0.129	0.398769	inflammatory DCs	Pigc
Ldhb	2.1441e-05	0.329461	0.429	0.083	0.405321	inflammatory DCs	Ldhb
Gm5150	2.36048e-05	0.604422	1	0.62	0.446224	inflammatory DCs	Gm5150
Gabarap	2.64458e-05	0.47832	1	0.969	0.499931	inflammatory DCs	Gabarap
Hlx	3.16972e-05	0.479171	0.786	0.269	0.599204	inflammatory DCs	Hlx
Arid5a	3.20671e-05	0.439857	0.714	0.236	0.606196	inflammatory DCs	Arid5a
Egr2	3.24214e-05	0.287558	0.214	0.024	0.612894	inflammatory DCs	Egr2
Lgals9	3.2442e-05	0.292851	0.429	0.09	0.613283	inflammatory DCs	Lgals9
Slc28a2	3.3294e-05	0.30615	0.786	0.221	0.62939	inflammatory DCs	Slc28a2
Tnfaip21	3.81386e-05	0.862645	1	0.688	0.720972	inflammatory DCs	Tnfaip2
Osm	3.8482e-05	0.959729	0.714	0.236	0.727463	inflammatory DCs	Osm
Gsn	4.36218e-05	0.446084	0.929	0.319	0.824626	inflammatory DCs	Gsn
Ccng2	4.45072e-05	0.263216	0.571	0.142	0.841365	inflammatory DCs	Ccng2
Fos1	4.48654e-05	0.579183	1	0.954	0.848135	inflammatory DCs	Fos
Isg20	4.68926e-05	0.277629	0.5	0.111	0.886457	inflammatory DCs	Isg20
Dok2	4.79145e-05	0.267384	0.357	0.066	0.905776	inflammatory DCs	Dok2
Sft2d2	4.99475e-05	0.284176	0.643	0.175	0.944208	inflammatory DCs	Sft2d2
Tmem176a	5.4897e-05	0.487342	0.643	0.19	1	inflammatory DCs	Tmem176a
Zdhhc18	5.55748e-05	0.273041	0.643	0.168	1	inflammatory DCs	Zdhhc18
Ubb	5.64941e-05	0.374021	1	0.993	1	inflammatory DCs	Ubb
Abhd5	5.79028e-05	0.317209	0.5	0.124	1	inflammatory DCs	Abhd5
Glipr2	6.12607e-05	0.317112	0.714	0.214	1	inflammatory DCs	Glipr2
Sema4a	6.65452e-05	0.565074	0.857	0.354	1	inflammatory DCs	Sema4a
Jaml1	7.34362e-05	0.661439	0.929	0.502	1	inflammatory DCs	Jaml
Ipmk	7.49485e-05	0.321276	0.786	0.249	1	inflammatory DCs	Ipmk
Litaf	7.77378e-05	0.515127	1	0.609	1	inflammatory DCs	Litaf
Pstpip1	7.97494e-05	0.360866	0.929	0.317	1	inflammatory DCs	Pstpip1
Ckap4	8.6996e-05	0.274806	0.5	0.124	1	inflammatory DCs	Ckap4
Amdhd2	8.7706e-05	0.261612	0.5	0.122	1	inflammatory DCs	Amdhd2
Alox5ap	9.01227e-05	0.495193	1	0.956	1	inflammatory DCs	Alox5ap
Fam122a	9.92513e-05	0.287695	0.429	0.098	1	inflammatory DCs	Fam122a
Cox8a	0.000123001	0.373339	1	0.969	1	inflammatory DCs	Cox8a
Map2k3	0.000126441	0.332758	0.929	0.301	1	inflammatory DCs	Map2k3
Il4ra	0.000134227	0.385176	0.786	0.301	1	inflammatory DCs	Il4ra
G0s2	0.000138888	2.29929	0.714	0.297	1	inflammatory DCs	G0s2
Tmem176b	0.000143917	0.701827	0.571	0.183	1	inflammatory DCs	Tmem176b
Cir1	0.000177412	0.373686	0.786	0.273	1	inflammatory DCs	Cir1
Igtp	0.000196093	0.410348	0.714	0.236	1	inflammatory DCs	Igtp
Igf1r	0.000200124	0.308728	0.571	0.166	1	inflammatory DCs	Igf1r
Sirpb1b	0.000204789	0.335913	0.929	0.376	1	inflammatory DCs	Sirpb1b
R3hdm4	0.000205794	0.441469	0.786	0.354	1	inflammatory DCs	R3hdm4
Rps9	0.000227044	0.294581	1	1	1	inflammatory DCs	Rps9
Gpr146	0.000235532	0.306566	0.571	0.159	1	inflammatory DCs	Gpr146
Hebp1	0.000278328	0.351648	0.786	0.264	1	inflammatory DCs	Hebp1
Tspan13	0.000319392	0.457255	1	0.71	1	inflammatory DCs	Tspan13
Sorl1	0.00032891	0.639751	0.929	0.624	1	inflammatory DCs	Sorl1
Atp6v1g1	0.00034945	0.484216	1	0.83	1	inflammatory DCs	Atp6v1g1
Tgfbi	0.000407341	0.575273	0.929	0.655	1	inflammatory DCs	Tgfbi
Ndrg1	0.000421253	0.272002	0.5	0.138	1	inflammatory DCs	Ndrg1
Ifi27l2a1	0.000430264	0.844996	1	0.727	1	inflammatory DCs	Ifi27l2a
Ccl24	0.00043178	0.526275	0.286	0.055	1	inflammatory DCs	Ccl24
Ctsd	0.000444409	0.426516	1	0.775	1	inflammatory DCs	Ctsd
2310001H17Rik	0.000449565	0.43647	0.786	0.29	1	inflammatory DCs	2310001H17Rik
Stat2	0.000488331	0.362155	0.571	0.172	1	inflammatory DCs	Stat2
Hmgn2	0.000504534	0.320627	0.786	0.301	1	inflammatory DCs	Hmgn2
Actg1	0.00050518	0.292039	1	1	1	inflammatory DCs	Actg1
Fbxl5	0.000513557	0.448885	0.929	0.563	1	inflammatory DCs	Fbxl5
Casp4	0.00052744	0.362717	0.929	0.341	1	inflammatory DCs	Casp4
Ppt2	0.000540383	0.41362	0.714	0.284	1	inflammatory DCs	Ppt2
Selplg	0.000622297	0.473902	1	0.777	1	inflammatory DCs	Selplg
Slc2a1	0.000629075	0.304229	0.571	0.183	1	inflammatory DCs	Slc2a1
Slc7a11	0.000647267	0.276903	0.429	0.111	1	inflammatory DCs	Slc7a11
Ifi47	0.000697545	0.4159	0.571	0.203	1	inflammatory DCs	Ifi47
Stfa3	0.000725636	0.859923	0.214	0.037	1	inflammatory DCs	Stfa3
Lilr4b	0.000730489	0.485787	0.929	0.614	1	inflammatory DCs	Lilr4b
Resf1	0.000734459	0.566421	1	0.557	1	inflammatory DCs	Resf1
C5ar1	0.00087711	0.419258	1	0.59	1	inflammatory DCs	C5ar1
Mettl9	0.000898628	0.377499	1	0.485	1	inflammatory DCs	Mettl9
Mthfs	0.000927059	0.326437	0.786	0.362	1	inflammatory DCs	Mthfs
Aif11	0.00103284	0.680206	0.857	0.52	1	inflammatory DCs	Aif1
Clec4e1	0.00103987	0.323046	1	0.655	1	inflammatory DCs	Clec4e
Msrb1	0.0010712	0.336507	1	0.989	1	inflammatory DCs	Msrb1
S100a6	0.00110643	0.671348	1	0.919	1	inflammatory DCs	S100a6
Socs3	0.00113316	0.507373	1	0.638	1	inflammatory DCs	Socs3
Prdx51	0.00116515	0.4294	1	0.976	1	inflammatory DCs	Prdx5
Tlr21	0.00121279	0.341981	1	0.478	1	inflammatory DCs	Tlr2
Pnpla2	0.0012175	0.384327	0.929	0.445	1	inflammatory DCs	Pnpla2
Hp1	0.00123411	0.445577	1	0.845	1	inflammatory DCs	Hp
Timm10b	0.00125371	0.433124	1	0.784	1	inflammatory DCs	Timm10b
Rnf167	0.0012861	0.271857	0.643	0.229	1	inflammatory DCs	Rnf167
Atg3	0.00131078	0.388527	0.929	0.6	1	inflammatory DCs	Atg3
Irf7	0.00132176	0.310253	0.929	0.4	1	inflammatory DCs	Irf7
Ypel3	0.0013455	0.377717	1	0.648	1	inflammatory DCs	Ypel3
H2-Aa1	0.00141339	0.937833	0.857	0.563	1	inflammatory DCs	H2-Aa
Ddx60	0.00147722	0.393054	0.286	0.061	1	inflammatory DCs	Ddx60
Pnp	0.00148427	0.48409	0.786	0.391	1	inflammatory DCs	Pnp
Marcksl11	0.00153981	0.471262	0.786	0.343	1	inflammatory DCs	Marcksl1
Zfp36	0.00154704	0.361316	1	0.98	1	inflammatory DCs	Zfp36
Cd37	0.0016074	0.375659	0.786	0.384	1	inflammatory DCs	Cd37
Srgn	0.00161178	0.409419	1	0.998	1	inflammatory DCs	Srgn
Mcemp11	0.00162639	0.337649	1	0.57	1	inflammatory DCs	Mcemp1
Atp11a	0.00167107	0.262021	0.357	0.096	1	inflammatory DCs	Atp11a
Chmp4b	0.00175883	0.334455	1	0.801	1	inflammatory DCs	Chmp4b
Ccdc86	0.00181682	0.259032	0.571	0.192	1	inflammatory DCs	Ccdc86
Hcst	0.00185772	0.461785	0.929	0.502	1	inflammatory DCs	Hcst
H2-DMa	0.00195579	0.562636	0.857	0.568	1	inflammatory DCs	H2-DMa
Msr1	0.00196225	0.305156	0.571	0.205	1	inflammatory DCs	Msr1
Smap2	0.00233336	0.307632	0.929	0.463	1	inflammatory DCs	Smap2
Tctex1d2	0.0023636	0.284526	0.571	0.207	1	inflammatory DCs	Tctex1d2
Tcp11l2	0.00237638	0.36135	0.429	0.153	1	inflammatory DCs	Tcp11l2
Rbm42	0.00239599	0.317069	0.929	0.485	1	inflammatory DCs	Rbm42
Dcun1d1	0.00260859	0.256868	0.857	0.347	1	inflammatory DCs	Dcun1d1
Pgls	0.00262206	0.343393	0.929	0.587	1	inflammatory DCs	Pgls
Cdk2ap2	0.00263725	0.482297	1	0.926	1	inflammatory DCs	Cdk2ap2
Gbp3	0.00270274	0.295899	0.643	0.271	1	inflammatory DCs	Gbp3
Trim30a	0.00273932	0.434368	0.786	0.345	1	inflammatory DCs	Trim30a
Id1	0.00275565	0.479997	0.429	0.131	1	inflammatory DCs	Id1
Ccdc88b	0.0029107	0.299793	0.786	0.345	1	inflammatory DCs	Ccdc88b
Plk3	0.00293742	0.364806	0.571	0.21	1	inflammatory DCs	Plk3
Bcl2l11	0.00303505	0.253743	0.643	0.242	1	inflammatory DCs	Bcl2l11
Mir142hg	0.00313134	0.258169	0.714	0.269	1	inflammatory DCs	Mir142hg
Pip5k1c	0.00319111	0.271125	0.786	0.352	1	inflammatory DCs	Pip5k1c
Chil3	0.00333555	0.276356	0.357	0.103	1	inflammatory DCs	Chil3
Sri	0.00338745	0.385244	1	0.766	1	inflammatory DCs	Sri
Btg2	0.00362455	0.344232	1	0.98	1	inflammatory DCs	Btg2
Gadd45a	0.00386613	0.312054	0.571	0.207	1	inflammatory DCs	Gadd45a
Rnf11	0.00399838	0.300336	0.643	0.264	1	inflammatory DCs	Rnf11
Evi2a	0.00403291	0.355722	0.857	0.491	1	inflammatory DCs	Evi2a
Tap11	0.00407062	0.370921	1	0.583	1	inflammatory DCs	Tap1
Nudt4	0.00422453	0.36543	0.714	0.338	1	inflammatory DCs	Nudt4
Vps28	0.0043402	0.335311	0.929	0.528	1	inflammatory DCs	Vps28
Ifi30	0.00439735	0.400366	0.929	0.729	1	inflammatory DCs	Ifi30
Ptafr1	0.00440123	0.276129	0.786	0.347	1	inflammatory DCs	Ptafr
Plac81	0.00486838	0.439417	1	0.989	1	inflammatory DCs	Plac8
2022-03-07	0.00488182	0.381629	0.857	0.524	1	inflammatory DCs	2022-03-07
H2-Eb11	0.00498639	0.780687	0.714	0.476	1	inflammatory DCs	H2-Eb1
Gatm	0.00504362	0.270058	0.571	0.227	1	inflammatory DCs	Gatm
Tceal9	0.00510923	0.542023	0.5	0.212	1	inflammatory DCs	Tceal9
Ccr21	0.00519615	0.463422	0.857	0.509	1	inflammatory DCs	Ccr2
Sub1	0.00564826	0.340031	1	0.891	1	inflammatory DCs	Sub1
Ninj11	0.0057232	0.393361	0.714	0.328	1	inflammatory DCs	Ninj1
H2-Ab11	0.00631499	0.964285	0.786	0.559	1	inflammatory DCs	H2-Ab1
Ndufa8	0.006395	0.302936	0.929	0.555	1	inflammatory DCs	Ndufa8
Lilrb4a	0.00653606	0.375395	1	0.847	1	inflammatory DCs	Lilrb4a
Cd741	0.0067554	0.717981	0.857	0.742	1	inflammatory DCs	Cd74
Trim12c	0.00762058	0.312216	0.714	0.297	1	inflammatory DCs	Trim12c
Pttg1ip	0.00814039	0.272414	0.857	0.376	1	inflammatory DCs	Pttg1ip
Ctnnbl1	0.00814546	0.287625	0.643	0.284	1	inflammatory DCs	Ctnnbl1
Pnpla7	0.00828662	0.267142	0.571	0.231	1	inflammatory DCs	Pnpla7
Snap23	0.00864923	0.281554	0.929	0.585	1	inflammatory DCs	Snap23
Snu13	0.00890835	0.284281	1	0.657	1	inflammatory DCs	Snu13
Mndal	0.00949704	0.363488	0.786	0.452	1	inflammatory DCs	Mndal
Thbs1	0.00981262	0.444997	0.214	0.052	1	inflammatory DCs	Thbs1
Cox7a2	0.00993518	0.301426	1	0.878	1	inflammatory DCs	Cox7a2

## Sheet: dc.subclusters.freq
	np	saline
activated cDCs	0.789757	0.188119
cDCs	0.175202	0.80198
inflammatory DCs	0.0350404	0.00990099
